# Supplementary material for: Functional characterization of all CDKN2A missense variants and comparison to in silico models of pathogenicity
Source: bioRxiv preprint, doi:10.1101/2023.12.28.573507, version 3 (2025-02-11)
Supplement: Appendix 1-table 4 [file 573507_file10.pdf]

Appendix 1-table 4. Assay outputs and functional classifications for all possible *CDKN24* missense and synonymous variants.

| Residue | Variant   | Benchmark  | Functionally reported VUS | Experiment_1 |             |            |             | Experiment_2 |             |            |             | Experiment_1  |                               | Experiment_2  |                               | Merged        |                    |                                    |
|---------|-----------|------------|---------------------------|--------------|-------------|------------|-------------|--------------|-------------|------------|-------------|---------------|-------------------------------|---------------|-------------------------------|---------------|--------------------|------------------------------------|
|         |           |            |                           | Read count   |             | Proportion |             | Read count   |             | Proportion |             | Log P value_1 | Functional characterization_1 | Log P value_2 | Functional characterization_2 |               | Log P value_merged | Functional characterization_merged |
|         |           |            |                           | Day 9_1      | Confluent_1 | Day 9_1    | Confluent_1 | Day 9_2      | Confluent_2 | Day 9_2    | Confluent_2 |               |                               |               |                               |               |                    |                                    |
| 1       | p.Met1Asn | Synonymous |                           | 7917         | 3240        | 4.45       | 4.27        |              |             |            |             | -1.53E-01     | Neutral                       |               |                               | -1.53E-01     | Neutral            |                                    |
| 1       | p.Met1Lys |            | 10656                     | 3866         | 5.99        | 5.10       |             |              |             |            | -8.17E-03   | Neutral       |                               |               | -8.17E-03                     | Neutral       |                    |                                    |
| 1       | p.Met1Thr |            | 8682                      | 3625         | 4.88        | 4.78       |             |              |             |            | -1.36E-01   | Neutral       |                               |               | -1.36E-01                     | Neutral       |                    |                                    |
| 1       | p.Met1Arg |            | 4562                      | 1607         | 2.56        | 2.12       |             |              |             |            | -2.18E-01   | Neutral       |                               |               | -2.18E-01                     | Neutral       |                    |                                    |
| 1       | p.Met1Ser |            | 14850                     | 6066         | 8.35        | 8.00       |             |              |             |            | -9.32E-03   | Neutral       |                               |               | -9.32E-03                     | Neutral       |                    |                                    |
| 1       | p.Met1Ile |            | 5660                      | 2304         | 3.18        | 3.04       |             |              |             |            | -4.38E-01   | Neutral       |                               |               | -4.38E-01                     | Neutral       |                    |                                    |
| 1       | p.Met1Met |            | 5258                      | 2332         | 2.96        | 3.08       |             |              |             |            | -1.06E+00   | Neutral       |                               |               | -1.06E+00                     | Neutral       |                    |                                    |
| 1       | p.Met1His |            | 5078                      | 2285         | 2.85        | 3.01       |             |              |             |            | -1.27E+00   | Neutral       |                               |               | -1.27E+00                     | Neutral       |                    |                                    |
| 1       | p.Met1Gln |            | 5985                      | 4102         | 5.39        | 5.41       |             |              |             |            | -1.24E-01   | Neutral       |                               |               | -1.24E-01                     | Neutral       |                    |                                    |
| 1       | p.Met1Pro |            | 5141                      | 1985         | 2.89        | 2.62       |             |              |             |            | -3.62E-01   | Neutral       |                               |               | -3.62E-01                     | Neutral       |                    |                                    |
| 1       | p.Met1Leu |            | 14664                     | 6252         | 8.24        | 8.25       |             |              |             |            | -1.90E-02   | Neutral       |                               |               | -1.90E-02                     | Neutral       |                    |                                    |
| 1       | p.Met1Asp |            | 14894                     | 5681         | 8.37        | 7.49       |             |              |             |            | -2.98E-03   | Neutral       |                               |               | -2.98E-03                     | Neutral       |                    |                                    |
| 1       | p.Met1Glu |            | 5078                      | 2195         | 2.85        | 2.89       |             |              |             |            | -9.57E-01   | Neutral       |                               |               | -9.57E-01                     | Neutral       |                    |                                    |
| 1       | p.Met1Ala |            | 8804                      | 3502         | 4.95        | 4.62       |             |              |             |            | -7.30E-02   | Neutral       |                               |               | -7.30E-02                     | Neutral       |                    |                                    |
| 1       | p.Met1Gly |            | 6523                      | 2720         | 3.67        | 3.59       |             |              |             |            | -3.55E-01   | Neutral       |                               |               | -3.55E-01                     | Neutral       |                    |                                    |
| 1       | p.Met1Val |            | 11052                     | 7911         | 6.21        | 10.43      |             |              |             |            | -4.16E+00   | Neutral       |                               |               | -4.16E+00                     | Neutral       |                    |                                    |
| 1       | p.Met1Tyr |            | 12992                     | 5282         | 7.30        | 6.97       |             |              |             |            | -1.70E-02   | Neutral       |                               |               | -1.70E-02                     | Neutral       |                    |                                    |
| 1       | p.Met1Cys |            | 14675                     | 5858         | 8.25        | 7.73       |             |              |             |            | -6.89E-03   | Neutral       |                               |               | -6.89E-03                     | Neutral       |                    |                                    |
| 1       | p.Met1Trp |            | 3926                      | 1599         | 2.21        | 2.11       |             |              |             |            | -1.15E+00   | Neutral       |                               |               | -1.15E+00                     | Neutral       |                    |                                    |
| 1       | p.Met1Phe |            | 7910                      | 3411         | 4.45        | 4.50       |             |              |             |            | -2.65E-01   | Neutral       |                               |               | -2.65E-01                     | Neutral       |                    |                                    |
| 2       | p.Glu2Asn | Synonymous |                           | 6727         | 2813        | 4.99       | 2.50        |              |             |            |             | -2.75E-14     | Neutral                       |               |                               | 0.00E+00      | Neutral            |                                    |
| 2       | p.Glu2Lys |            | 6744                      | 5413         | 5.01        | 4.81       |             |              |             |            | -2.54E+00   | Neutral       |                               |               | -2.54E+00                     | Neutral       |                    |                                    |
| 2       | p.Glu2Thr |            | 5212                      | 4425         | 3.87        | 3.93       |             |              |             |            | -6.21E-05   | Neutral       |                               |               | -6.21E-05                     | Neutral       |                    |                                    |
| 2       | p.Glu2Arg |            | 5222                      | 2299         | 3.88        | 2.04       |             |              |             |            | -1.88E-12   | Neutral       |                               |               | 0.00E+00                      | Neutral       |                    |                                    |
| 2       | p.Glu2Ser |            | 4630                      | 6041         | 3.44        | 5.36       |             |              |             |            | -1.34E-01   | Neutral       |                               |               | -1.34E-01                     | Neutral       |                    |                                    |
| 2       | p.Glu2Ile |            | 7541                      | 3779         | 5.60        | 3.36       |             |              |             |            | -2.35E-12   | Neutral       |                               |               | 0.00E+00                      | Neutral       |                    |                                    |
| 2       | p.Glu2Met |            | 6300                      | 7369         | 4.68        | 6.54       |             |              |             |            | -7.63E-03   | Neutral       |                               |               | -7.63E-03                     | Neutral       |                    |                                    |
| 2       | p.Glu2His |            | 7815                      | 6349         | 5.80        | 5.64       |             |              |             |            | -1.05E-06   | Neutral       |                               |               | -1.05E-06                     | Neutral       |                    |                                    |
| 2       | p.Glu2Gln |            | 9277                      | 5087         | 6.89        | 4.52       |             |              |             |            | -4.48E-12   | Neutral       |                               |               | 0.00E+00                      | Neutral       |                    |                                    |
| 2       | p.Glu2Pro |            | 8059                      | 5092         | 5.98        | 4.52       |             |              |             |            | -1.09E+00   | Neutral       |                               |               | -9.43E-10                     | Neutral       |                    |                                    |
| 2       | p.Glu2Leu |            | 7335                      | 3699         | 5.44        | 3.28       |             |              |             |            | -3.77E-12   | Neutral       |                               |               | 0.00E+00                      | Neutral       |                    |                                    |
| 2       | p.Glu2Asp |            | 4954                      | 1515         | 3.68        | 1.35       |             |              |             |            | 0.00E+00    | Neutral       |                               |               | 0.00E+00                      | Neutral       |                    |                                    |
| 2       | p.Glu2Glu |            | 9092                      | 18647        | 6.75        | 16.56      |             |              |             |            | -1.06E+00   | Neutral       |                               |               | -1.06E+00                     | Neutral       |                    |                                    |
| 2       | p.Glu2Ala |            | 6504                      | 8164         | 4.83        | 7.25       |             |              |             |            | -1.91E-02   | Neutral       |                               |               | -1.91E-02                     | Neutral       |                    |                                    |
| 2       | p.Glu2Gly |            | 5629                      | 4118         | 4.18        | 3.66       |             |              |             |            | -1.16E-06   | Neutral       |                               |               | -1.16E-06                     | Neutral       |                    |                                    |
| 2       | p.Glu2Val |            | 6747                      | 3223         | 5.01        | 2.86       |             |              |             |            | -1.69E-12   | Neutral       |                               |               | 0.00E+00                      | Neutral       |                    |                                    |
| 2       | p.Glu2Tyr |            | 4650                      | 2961         | 3.45        | 2.63       |             |              |             |            | -1.78E-07   | Neutral       |                               |               | -1.78E-07                     | Neutral       |                    |                                    |
| 2       | p.Glu2Cys |            | 6088                      | 7985         | 4.52        | 7.09       |             |              |             |            | -4.74E-02   | Neutral       |                               |               | -4.74E-02                     | Neutral       |                    |                                    |
| 2       | p.Glu2Trp |            | 7642                      | 6902         | 5.67        | 6.13       |             |              |             |            | -1.49E-05   | Neutral       |                               |               | -1.49E-05                     | Neutral       |                    |                                    |
| 2       | p.Glu2Phe |            | 8566                      | 6750         | 6.36        | 5.99       |             |              |             |            | -2.31E-07   | Neutral       |                               |               | -2.31E-07                     | Neutral       |                    |                                    |
| 3       | p.Pro3Asn | Synonymous |                           | 10479        | 4032        | 5.98       | 5.43        |              |             |            |             | -7.64E+00     | Indeterminate                 |               |                               | -7.64E+00     | Indeterminate      |                                    |
| 3       | p.Pro3Lys |            | 6030                      | 2500         | 3.44        | 3.37       |             |              |             |            | -1.84E+01   | Indeterminate |                               |               | -1.84E+01                     | Indeterminate |                    |                                    |
| 3       | p.Pro3Thr |            | 8211                      | 4197         | 4.69        | 4.31       |             |              |             |            | -1.08E+01   | Indeterminate |                               |               | -1.08E+01                     | Indeterminate |                    |                                    |
| 3       | p.Pro3Arg |            | 8154                      | 5051         | 4.66        | 6.81       |             |              |             |            | -4.02E+01   | Indeterminate |                               |               | -3.32E+01                     | Indeterminate |                    |                                    |
| 3       | p.Pro3Ser |            | 7465                      | 3568         | 4.26        | 4.81       |             |              |             |            | -2.25E+01   | Indeterminate |                               |               | -2.25E+01                     | Indeterminate |                    |                                    |
| 3       | p.Pro3Ile |            | 6870                      | 2552         | 3.92        | 3.44       |             |              |             |            | -1.13E+01   | Indeterminate |                               |               | -1.13E+01                     | Indeterminate |                    |                                    |
| 3       | p.Pro3Met |            | 6862                      | 3240         | 3.92        | 4.37       |             |              |             |            | -2.35E+01   | Indeterminate |                               |               | -2.35E+01                     | Indeterminate |                    |                                    |
| 3       | p.Pro3His |            | 6669                      | 2007         | 3.81        | 2.71       |             |              |             |            | -5.11E+00   | Neutral       |                               |               | -5.11E+00                     | Neutral       |                    |                                    |
| 3       | p.Pro3Gln |            | 7887                      | 1624         | 4.50        | 2.19       |             |              |             |            | -2.77E-01   | Neutral       |                               |               | -2.77E-01                     | Neutral       |                    |                                    |
| 3       | p.Pro3Pro |            | 12225                     | 3414         | 6.98        | 4.60       |             |              |             |            | -1.06E+00   | Neutral       |                               |               | -1.06E+00                     | Neutral       |                    |                                    |
| 3       | p.Pro3Leu |            | 7911                      | 3359         | 4.52        | 4.53       |             |              |             |            | -1.50E+01   | Indeterminate |                               |               | -1.50E+01                     | Indeterminate |                    |                                    |
| 3       | p.Pro3Asp |            | 11034                     | 5168         | 6.30        | 6.97       |             |              |             |            | -1.44E+01   | Indeterminate |                               |               | -1.44E+01                     | Indeterminate |                    |                                    |
| 3       | p.Pro3Glu |            | 8543                      | 2741         | 4.88        | 3.69       |             |              |             |            | -4.70E+00   | Neutral       |                               |               | -4.70E+00                     | Neutral       |                    |                                    |
| 3       | p.Pro3Ala |            | 7836                      | 3235         | 4.47        | 3.13       |             |              |             |            | -3.70E+00   | Neutral       |                               |               | -3.70E+00                     | Neutral       |                    |                                    |
| 3       | p.Pro3Gly |            | 9287                      | 7121         | 5.30        | 9.60       |             |              |             |            | -5.32E+01   | Deleterious   |                               |               | -5.32E+01                     | Deleterious   |                    |                                    |
| 3       | p.Pro3Val |            | 11755                     | 5610         | 6.71        | 7.56       |             |              |             |            | -1.43E+01   | Indeterminate |                               |               | -1.43E+01                     | Indeterminate |                    |                                    |
| 3       | p.Pro3Tyr |            | 8286                      | 2722         | 4.73        | 3.67       |             |              |             |            | -5.47E+00   | Neutral       |                               |               | -5.47E+00                     | Neutral       |                    |                                    |
| 3       | p.Pro3Cys |            | 9700                      | 4045         | 5.45        | 5.45       |             |              |             |            | -1.13E+01   | Indeterminate |                               |               | -1.13E+01                     | Indeterminate |                    |                                    |
| 3       | p.Pro3Trp |            | 7181                      | 3898         | 4.10        | 5.25       |             |              |             |            | -3.25E+01   | Indeterminate |                               |               | -3.18E+01                     | Indeterminate |                    |                                    |
| 3       | p.Pro3Phe |            | 12773                     | 6021         | 7.29        | 8.12       |             |              |             |            | -1.26E+01   | Indeterminate |                               |               | -1.26E+01                     | Indeterminate |                    |                                    |
| 4       | p.Ala4Asn | Synonymous |                           | 6496         | 5119        | 5.55       | 5.97        |              |             |            |             | -5.71E+00     | Neutral                       |               |                               | -5.71E+00     | Neutral            |                                    |
| 4       | p.Ala4Lys |            | 5599                      | 3201         | 4.79        | 3.73       |             |              |             |            | -1.31E+00   | Neutral       |                               |               | -1.31E+00                     | Neutral       |                    |                                    |
| 4       | p.Ala4Thr |            | 6049                      | 9770         | 5.17        | 11.39      |             |              |             |            | -5.14E+01   | Indeterminate |                               |               | -3.32E+01                     | Indeterminate |                    |                                    |
| 4       | p.Ala4Arg |            | 6946                      | 4316         | 5.94        | 5.03       |             |              |             |            | -1.41E+00   | Neutral       |                               |               | -1.41E+00                     | Neutral       |                    |                                    |
| 4       | p.Ala4Ser |            | 5204                      | 8721         | 4.45        | 10.16      |             |              |             |            | -5.32E+01   | Deleterious   |                               |               | -5.32E+01                     | Deleterious   |                    |                                    |
| 4       | p.Ala4Ile |            | 5102                      | 2244         | 4.36        | 2.62       |             |              |             |            | -1.79E-01   | Neutral       |                               |               | -1.79E-01                     | Neutral       |                    |                                    |
| 4       | p.Ala4Met |            | 6306                      | 5309         | 5.39        | 6.19       |             |              |             |            | -7.81E+00   | Indeterminate |                               |               | -7.81E+00                     | Indeterminate |                    |                                    |
| 4       | p.Ala4His |            | 9180                      | 6186         | 7.85        | 7.21       |             |              |             |            | -1.31E+00   | Neutral       |                               |               | -1.31E+00                     | Neutral       |                    |                                    |
| 4       | p.Ala4Gln |            | 4555                      | 2044         | 3.89        | 2.38       |             |              |             |            | -3.21E-01   | Neutral       |                               |               | -3.21E-01                     | Neutral       |                    |                                    |
| 4       | p.Ala4Pro |            | 4683                      | 2290         | 4.00        | 2.67       |             |              |             |            | -6.33E-01   | Neutral       |                               |               | -6.33E-01                     | Neutral       |                    |                                    |
| 4       | p.Ala4Leu |            | 6006                      | 3343         | 5.13        | 3.90       |             |              |             |            | -9.14E-01   | Neutral       |                               |               | -9.14E-01                     | Neutral       |                    |                                    |
| 4       | p.Ala4Asp |            | 4923                      | 3133         | 4.21        | 3.65       |             |              |             |            | -3.20E+00   | Neutral       |                               |               | -3.20E+00                     | Neutral       |                    |                                    |
| 4       | p.Ala4Glu |            | 5399                      | 2024         | 4.62        | 2.36       |             |              |             |            | -1.89E-02   | Neutral       |                               |               | -1.89E-02                     | Neutral       |                    |                                    |
| 4       | p.Ala4Ala |            | 6423                      | 3731         | 5.49        | 4.35       |             |              |             |            | -1.06E+00   | Neutral       |                               |               | -1.06E+00                     | Neutral       |                    |                                    |
| 4       | p.Ala4Gly |            | 5628                      | 4372         | 4.81        | 5.10       |             |              |             |            | -6.58E+00   | Indeterminate |                               |               | -6.58E+00                     | Indeterminate |                    |                                    |
| 4       | p.Ala4Val |            | 6269                      | 2830         | 5.36        | 3.30       |             |              |             |            | -1.12E-01   | Neutral       |                               |               | -1.12E-01                     | Neutral       |                    |                                    |
| 4       | p.Ala4Tyr |            | 5640                      | 2955         | 4.82        | 3.44       |             |              |             |            | -6.72E-01   | Neutral       |                               |               | -6.72E-01                     | Neutral       |                    |                                    |
| 4       | p.Ala4Cys |            | 4485                      | 5419         | 3.83        | 6.32       |             |              |             |            | -3.33E+01   | Indeterminate |                               |               | -3.23E+01                     | Indeterminate |                    |                                    |
| 4       | p.Ala4Trp |            | 6700                      | 4351         | 5.73        | 5.07       |             |              |             |            | -2.02E+00   | Neutral       |                               |               | -2.02E+00                     | Neutral       |                    |                                    |
| 4       | p.Ala4Phe |            | 5374                      | 4447         | 4.59        | 5.18       |             |              |             |            | -8.96E+00   | Indeterminate |                               |               | -8.96E+00                     | Indeterminate |                    |                                    |
| 5       | p.Ala5Asn | Synonymous |                           | 10398        | 3217        | 7.08       | 4.47        |              |             |            |             | -1.02E-02     | Neutral                       |               |                               | -1.02E-02     | Neutral            |                                    |
| 5       | p.Ala5Lys |            | 6616                      | 943          | 4.50        | 1.31       |             |              |             |            | -1.32E-08   | Neutral       |                               |               | -1.31E-08                     | Neutral       |                    |                                    |
| 5       | p.Ala5Thr |            | 7235                      | 2897         | 4.92        | 4.02       |             |              |             |            | -7.68E-01   | Neutral       |                               |               | -7.68E-01                     | Neutral       |                    |                                    |
| 5       | p.Ala5Arg |            | 6763                      | 1495         | 4.60        | 2.08       |             |              |             |            | -3.35E-04   | Neutral       |                               |               | -3.35E-04                     | Neutral       |                    |                                    |
| 5       | p.Ala5Ser |            | 6901                      | 7643         | 4.70        | 10.62      |             |              |             |            | -4.59E+01   | Indeterminate |                               |               | -3.32E+01                     | Indeterminate |                    |                                    |
| 5       | p.Ala5Ile |            | 9416                      | 1133         | 6.41        | 1.57       |             |              |             |            | -3.62E-12   | Neutral       |                               |               | 0.00E+00                      | Neutral       |                    |                                    |
| 5       | p.Ala5Met |            | 6059                      | 2031         | 4.12        | 2.82       |             |              |             |            | -2.70E-01   | Neutral       |                               |               | -2.70E-01                     | Neutral       |                    |                                    |
| 5       | p.Ala5His |            | 9217                      | 3925         | 6.27        | 5.45       |             |              |             |            | -6.61E-01   | Neutral       |                               |               | -6.61E-01                     | Neutral       |                    |                                    |
| 5       | p.Ala5Gln |            | 8603                      | 3685         | 5.86        | 5.13       |             |              |             |            | -8.29E-01   | Neutral       |                               |               | -8.29E-01                     | Neutral       |                    |                                    |
| 5       | p.Ala5Pro |            | 8547                      | 2852         | 5.82        | 3.96       |             |              |             |            | -7.23E-02   | Neutral       |                               |               | -7.23E-02                     | Neutral       |                    |                                    |
| 5       | p.Ala5Leu |            | 10779                     | 7833         | 7.34        | 10.88      |             |              |             |            | -9.21E+00   | Indeterminate |                               |               | -9.21E+00                     | Indeterminate |                    |                                    |
| 5       | p.Ala5Asp |            | 7000                      | 3082         | 4.76        | 4.28       |             |              |             |            | -1.63E+00   | Neutral       |                               |               | -1.63E+00                     | Neutral       |                    |                                    |
| 5       | p.Ala5Glu |            | 5477                      | 2907         | 3.73        | 4.04       |             |              |             |            | -6.48E+00   | Indeterminate |                               |               | -6.48E+00                     | Indeterminate |                    |                                    |
| 5       | p.Ala5Ala |            | 5728                      | 2216         | 3.90        | 3.08       |             |              |             |            |             |               |                               |               |                               |               |                    |                                    |

|    |            |       |      |      |       |           |               |           |               |
|----|------------|-------|------|------|-------|-----------|---------------|-----------|---------------|
| 7  | p.Ser7Glu  | 5274  | 1263 | 1.38 | 1.75  | -2.95E+01 | Indeterminate | -2.94E+01 | Indeterminate |
| 7  | p.Ser7Ala  | 13797 | 3900 | 3.62 | 5.41  | -1.95E+01 | Indeterminate | -1.95E+01 | Indeterminate |
| 7  | p.Ser7Gly  | 34546 | 4664 | 9.06 | 6.48  | -1.55E-02 | Neutral       | -1.55E-02 | Neutral       |
| 7  | p.Ser7Val  | 6451  | 937  | 1.69 | 1.30  | -4.25E+00 | Neutral       | -4.25E+00 | Neutral       |
| 7  | p.Ser7Tyr  | 14033 | 5213 | 3.68 | 7.24  | -3.89E+01 | Indeterminate | -3.32E+01 | Indeterminate |
| 7  | p.Ser7Cys  | 15237 | 2771 | 4.00 | 3.85  | -3.14E+00 | Neutral       | -3.14E+00 | Neutral       |
| 7  | p.Ser7Trp  | 10664 | 2020 | 2.80 | 2.80  | -6.60E+00 | Indeterminate | -6.60E+00 | Indeterminate |
| 7  | p.Ser7Phe  | 18617 | 3141 | 4.88 | 4.36  | -1.35E+00 | Neutral       | -1.35E+00 | Neutral       |
| 8  | p.Ser8Asn  | 5102  | 2754 | 5.51 | 4.26  | -1.03E-03 | Neutral       | -1.03E-03 | Neutral       |
| 8  | p.Ser8Lys  | 3518  | 5765 | 3.80 | 8.91  | -2.11E+01 | Indeterminate | -2.11E+01 | Indeterminate |
| 8  | p.Ser8Thr  | 5291  | 4626 | 5.72 | 7.15  | -5.41E-01 | Neutral       | -5.41E-01 | Neutral       |
| 8  | p.Ser8Arg  | 4648  | 3049 | 5.02 | 4.71  | -3.81E-02 | Neutral       | -3.81E-02 | Neutral       |
| 8  | p.Ser8Ser  | 5221  | 4953 | 5.64 | 7.66  | -1.06E+00 | Neutral       | -1.06E+00 | Neutral       |
| 8  | p.Ser8Ile  | 6586  | 4481 | 7.11 | 6.93  | -1.22E-02 | Neutral       | -1.22E-02 | Neutral       |
| 8  | p.Ser8Met  | 3576  | 1885 | 3.86 | 2.91  | -5.33E-03 | Neutral       | -5.33E-03 | Neutral       |
| 8  | p.Ser8His  | 4006  | 2293 | 4.33 | 3.54  | -1.09E-02 | Neutral       | -1.09E-02 | Neutral       |
| 8  | p.Ser8Gln  | 5026  | 3177 | 5.43 | 4.91  | -1.56E-02 | Neutral       | -1.56E-02 | Neutral       |
| 8  | p.Ser8Pro  | 3368  | 2661 | 3.64 | 4.11  | -8.03E-01 | Neutral       | -8.03E-01 | Neutral       |
| 8  | p.Ser8Leu  | 4268  | 3385 | 4.61 | 5.23  | -4.31E-01 | Neutral       | -4.31E-01 | Neutral       |
| 8  | p.Ser8Asp  | 5645  | 3906 | 6.10 | 6.04  | -3.28E-02 | Neutral       | -3.28E-02 | Neutral       |
| 8  | p.Ser8Glu  | 5235  | 2231 | 5.65 | 3.45  | -6.17E-06 | Neutral       | -6.17E-06 | Neutral       |
| 8  | p.Ser8Ala  | 3572  | 2303 | 3.86 | 3.56  | -9.28E-02 | Neutral       | -9.28E-02 | Neutral       |
| 8  | p.Ser8Gly  | 4071  | 3170 | 4.40 | 4.90  | -4.21E-01 | Neutral       | -4.21E-01 | Neutral       |
| 8  | p.Ser8Val  | 5367  | 3622 | 5.80 | 5.60  | -2.92E-02 | Neutral       | -2.92E-02 | Neutral       |
| 8  | p.Ser8Tyr  | 4234  | 2444 | 4.57 | 3.78  | -9.30E-03 | Neutral       | -9.30E-03 | Neutral       |
| 8  | p.Ser8Cys  | 4875  | 2414 | 5.27 | 3.73  | -2.62E-04 | Neutral       | -2.62E-04 | Neutral       |
| 8  | p.Ser8Trp  | 5137  | 2823 | 5.55 | 4.36  | -1.37E-03 | Neutral       | -1.37E-03 | Neutral       |
| 8  | p.Ser8Phe  | 3833  | 2741 | 4.14 | 4.24  | -2.25E-01 | Neutral       | -2.25E-01 | Neutral       |
| 9  | p.Met9Asn  | 7469  | 3933 | 4.84 | 4.81  | -2.11E-01 | Neutral       | -2.11E-01 | Neutral       |
| 9  | p.Met9Lys  | 9609  | 5540 | 6.23 | 6.77  | -2.27E-01 | Neutral       | -2.27E-01 | Neutral       |
| 9  | p.Met9Thr  | 8791  | 5010 | 5.70 | 6.12  | -2.72E-01 | Neutral       | -2.72E-01 | Neutral       |
| 9  | p.Met9Arg  | 10762 | 5831 | 6.97 | 7.12  | -7.40E-02 | Neutral       | -7.40E-02 | Neutral       |
| 9  | p.Met9Ser  | 5046  | 2796 | 3.27 | 3.42  | -1.02E+00 | Neutral       | -1.02E+00 | Neutral       |
| 9  | p.Met9Ile  | 8383  | 4731 | 5.43 | 5.78  | -2.88E-01 | Neutral       | -2.88E-01 | Neutral       |
| 9  | p.Met9Met  | 3169  | 1512 | 2.05 | 1.85  | -1.06E+00 | Neutral       | -1.06E+00 | Neutral       |
| 9  | p.Met9His  | 4318  | 2163 | 2.80 | 2.64  | -7.05E-01 | Neutral       | -7.05E-01 | Neutral       |
| 9  | p.Met9Gln  | 5190  | 2565 | 3.36 | 3.13  | -3.71E-01 | Neutral       | -3.71E-01 | Neutral       |
| 9  | p.Met9Pro  | 6382  | 3588 | 4.14 | 4.38  | -6.27E-01 | Neutral       | -6.27E-01 | Neutral       |
| 9  | p.Met9Leu  | 8726  | 3851 | 5.66 | 4.71  | -1.14E-02 | Neutral       | -1.14E-02 | Neutral       |
| 9  | p.Met9Asp  | 9850  | 5446 | 6.38 | 6.65  | -1.33E-01 | Neutral       | -1.33E-01 | Neutral       |
| 9  | p.Met9Glu  | 8636  | 4204 | 5.60 | 5.14  | -4.81E-02 | Neutral       | -4.81E-02 | Neutral       |
| 9  | p.Met9Ala  | 8064  | 4131 | 5.23 | 5.05  | -1.19E-01 | Neutral       | -1.19E-01 | Neutral       |
| 9  | p.Met9Gly  | 6394  | 3368 | 4.14 | 4.12  | -3.52E-01 | Neutral       | -3.52E-01 | Neutral       |
| 9  | p.Met9Val  | 8528  | 6087 | 5.53 | 6.22  | -4.58E-01 | Neutral       | -4.58E-01 | Neutral       |
| 9  | p.Met9Tyr  | 9867  | 4712 | 6.39 | 5.76  | -2.01E-02 | Neutral       | -2.01E-02 | Neutral       |
| 9  | p.Met9Cys  | 8011  | 4120 | 5.19 | 5.03  | -1.27E-01 | Neutral       | -1.27E-01 | Neutral       |
| 9  | p.Met9Trp  | 9040  | 4855 | 5.86 | 5.93  | -1.32E-01 | Neutral       | -1.32E-01 | Neutral       |
| 9  | p.Met9Phe  | 8063  | 4400 | 5.23 | 5.38  | -2.35E-01 | Neutral       | -2.35E-01 | Neutral       |
| 10 | p.Glu10Asn | 6098  | 2242 | 4.21 | 3.54  | -2.65E+00 | Neutral       | -2.65E+00 | Neutral       |
| 10 | p.Glu10Lys | 5462  | 4301 | 3.77 | 6.80  | -4.13E+01 | Indeterminate | -3.32E+01 | Indeterminate |
| 10 | p.Glu10Thr | 5428  | 2183 | 3.75 | 3.45  | -5.04E+00 | Neutral       | -5.04E+00 | Neutral       |
| 10 | p.Glu10Arg | 6859  | 2202 | 4.74 | 3.48  | -8.52E-01 | Neutral       | -8.52E-01 | Neutral       |
| 10 | p.Glu10Ser | 4238  | 2388 | 2.93 | 3.77  | -2.20E+01 | Indeterminate | -2.20E+01 | Indeterminate |
| 10 | p.Glu10Ile | 5736  | 3004 | 3.96 | 4.75  | -1.30E+01 | Indeterminate | -1.30E+01 | Indeterminate |
| 10 | p.Glu10Met | 10083 | 5755 | 6.96 | 9.09  | -9.12E+00 | Indeterminate | -9.12E+00 | Indeterminate |
| 10 | p.Glu10His | 7085  | 5545 | 4.89 | 8.76  | -3.32E+01 | Indeterminate | -3.22E+01 | Indeterminate |
| 10 | p.Glu10Gln | 8938  | 2836 | 6.17 | 4.48  | -3.68E-01 | Neutral       | -3.68E-01 | Neutral       |
| 10 | p.Glu10Pro | 9004  | 3151 | 6.22 | 4.98  | -8.25E-01 | Neutral       | -8.25E-01 | Neutral       |
| 10 | p.Glu10Leu | 4693  | 1833 | 2.24 | 2.90  | -5.49E+00 | Neutral       | -5.49E+00 | Neutral       |
| 10 | p.Glu10Asp | 7860  | 3023 | 5.43 | 4.78  | -2.12E+00 | Neutral       | -2.12E+00 | Neutral       |
| 10 | p.Glu10Glu | 7526  | 2567 | 5.20 | 4.06  | -1.06E+00 | Neutral       | -1.06E+00 | Neutral       |
| 10 | p.Glu10Ala | 3045  | 1836 | 2.10 | 2.90  | -3.48E+01 | Indeterminate | -3.28E+01 | Indeterminate |
| 10 | p.Glu10Gly | 7598  | 2700 | 5.25 | 4.27  | -1.38E+00 | Neutral       | -1.38E+00 | Neutral       |
| 10 | p.Glu10Val | 8257  | 2931 | 5.70 | 4.63  | -1.13E+00 | Neutral       | -1.13E+00 | Neutral       |
| 10 | p.Glu10Tyr | 11783 | 5357 | 8.14 | 8.47  | -2.56E+00 | Neutral       | -2.56E+00 | Neutral       |
| 10 | p.Glu10Cys | 11223 | 4410 | 7.75 | 6.97  | -1.13E+00 | Neutral       | -1.13E+00 | Neutral       |
| 10 | p.Glu10Trp | 7320  | 2533 | 5.05 | 4.00  | -1.25E+00 | Neutral       | -1.25E+00 | Neutral       |
| 10 | p.Glu10Phe | 6589  | 2486 | 4.55 | 3.93  | -2.65E+00 | Neutral       | -2.65E+00 | Neutral       |
| 11 | p.Pro11Asn | 8506  | 1300 | 5.16 | 5.15  | -1.32E+00 | Neutral       | -1.32E+00 | Neutral       |
| 11 | p.Pro11Lys | 6439  | 1122 | 3.91 | 4.44  | -4.63E+00 | Neutral       | -4.63E+00 | Neutral       |
| 11 | p.Pro11Thr | 5725  | 1120 | 3.47 | 4.43  | -8.84E+00 | Indeterminate | -8.84E+00 | Indeterminate |
| 11 | p.Pro11Arg | 6357  | 933  | 3.86 | 3.69  | -1.90E+00 | Neutral       | -1.90E+00 | Neutral       |
| 11 | p.Pro11Ser | 8111  | 1330 | 4.92 | 5.27  | -2.27E+00 | Neutral       | -2.27E+00 | Neutral       |
| 11 | p.Pro11Ile | 8262  | 1268 | 5.01 | 5.02  | -1.45E+00 | Neutral       | -1.45E+00 | Neutral       |
| 11 | p.Pro11Met | 12247 | 1773 | 7.43 | 7.02  | -3.21E+01 | Neutral       | -3.21E+01 | Neutral       |
| 11 | p.Pro11His | 7706  | 1174 | 4.68 | 4.65  | -1.60E+00 | Neutral       | -1.60E+00 | Neutral       |
| 11 | p.Pro11Gln | 8805  | 1147 | 5.34 | 4.54  | -3.33E-01 | Neutral       | -3.33E-01 | Neutral       |
| 11 | p.Pro11Pro | 6518  | 884  | 3.95 | 3.50  | -1.06E+00 | Neutral       | -1.06E+00 | Neutral       |
| 11 | p.Pro11Leu | 7222  | 1095 | 4.38 | 4.34  | -1.78E+00 | Neutral       | -1.78E+00 | Neutral       |
| 11 | p.Pro11Asp | 10405 | 1506 | 6.31 | 5.96  | -5.22E-01 | Neutral       | -5.22E-01 | Neutral       |
| 11 | p.Pro11Glu | 7910  | 1079 | 4.80 | 4.27  | -6.80E-01 | Neutral       | -6.80E-01 | Neutral       |
| 11 | p.Pro11Ala | 12124 | 1807 | 7.36 | 7.15  | -4.33E-01 | Neutral       | -4.33E-01 | Neutral       |
| 11 | p.Pro11Gly | 8624  | 1400 | 5.23 | 5.54  | -1.89E+00 | Neutral       | -1.89E+00 | Neutral       |
| 11 | p.Pro11Val | 8786  | 1298 | 5.33 | 5.14  | -9.61E-01 | Neutral       | -9.61E-01 | Neutral       |
| 11 | p.Pro11Tyr | 7352  | 1214 | 4.46 | 4.81  | -2.83E+00 | Neutral       | -2.83E+00 | Neutral       |
| 11 | p.Pro11Cys | 7776  | 1069 | 4.72 | 4.23  | -7.57E-01 | Neutral       | -7.57E-01 | Neutral       |
| 11 | p.Pro11Trp | 7900  | 1402 | 4.79 | 5.55  | -3.64E+00 | Neutral       | -3.64E+00 | Neutral       |
| 11 | p.Pro11Phe | 8057  | 1336 | 4.89 | 5.29  | -2.45E+00 | Neutral       | -2.45E+00 | Neutral       |
| 12 | p.Ser12Asn | 4278  | 1302 | 3.95 | 3.63  | -1.24E+00 | Neutral       | -1.24E+00 | Neutral       |
| 12 | p.Ser12Lys | 4907  | 1159 | 4.53 | 3.23  | -7.52E-02 | Neutral       | -7.52E-02 | Neutral       |
| 12 | p.Ser12Thr | 5668  | 1434 | 5.24 | 4.00  | -9.67E-02 | Neutral       | -9.67E-02 | Neutral       |
| 12 | p.Ser12Arg | 4891  | 1365 | 4.52 | 3.81  | -4.41E-01 | Neutral       | -4.41E-01 | Neutral       |
| 12 | p.Ser12Ser | 5874  | 1944 | 5.43 | 5.42  | -1.06E+00 | Neutral       | -1.06E+00 | Neutral       |
| 12 | p.Ser12Ile | 4931  | 1318 | 4.56 | 3.67  | -2.87E-01 | Neutral       | -2.87E-01 | Neutral       |
| 12 | p.Ser12Met | 5639  | 1332 | 5.21 | 3.71  | -4.17E-02 | Neutral       | -4.17E-02 | Neutral       |
| 12 | p.Ser12His | 5177  | 1913 | 4.78 | 5.33  | -2.76E+00 | Neutral       | -2.76E+00 | Neutral       |
| 12 | p.Ser12Gln | 6165  | 2351 | 5.70 | 6.55  | -2.38E+00 | Neutral       | -2.38E+00 | Neutral       |
| 12 | p.Ser12Pro | 6926  | 1787 | 6.40 | 4.98  | -5.42E-02 | Neutral       | -5.42E-02 | Neutral       |
| 12 | p.Ser12Leu | 7110  | 5319 | 6.57 | 15.38 | -2.85E+00 | Indeterminate | -2.84E+00 | Indeterminate |
| 12 | p.Ser12Asp | 6223  | 1364 | 5.75 | 3.80  | -8.73E-03 | Neutral       | -8.73E-03 | Neutral       |
| 12 | p.Ser12Glu | 3816  | 1115 | 3.53 | 3.11  | -1.21E+00 | Neutral       | -1.21E+00 | Neutral       |
| 12 | p.Ser12Ala | 4304  | 1215 | 3.98 | 3.39  | -6.95E-01 | Neutral       | -6.95E-01 | Neutral       |
| 12 | p.Ser12Gly | 6165  | 1672 | 5.70 | 4.66  | -1.55E-01 | Neutral       | -1.55E-01 | Neutral       |
| 12 | p.Ser12Val | 3830  | 1433 | 3.54 | 3.99  | -4.85E+00 | Neutral       | -4.85E+00 | Neutral       |
| 12 | p.Ser12Tyr | 5082  | 1268 | 4.70 | 3.53  | -1.25E-01 | Neutral       | -1.25E-01 | Neutral       |
| 12 | p.Ser12Cys | 5540  | 2071 | 5.12 | 5.77  | -2.60E+00 | Neutral       | -2.60E+00 | Neutral       |
| 12 | p.Ser12Trp | 4602  | 1720 | 4.25 | 4.79  | -3.60E+00 | Neutral       | -3.60E+00 | Neutral       |
| 12 | p.Ser12Phe | 7080  | 2591 | 6.54 | 7.22  | -1.39E+00 | Neutral       | -1.39E+00 | Neutral       |
| 13 | p.Alal3Asn | 4218  | 1562 | 5.37 | 4.39  | -1.90E-03 | Neutral       | -1.90E-03 | Neutral       |
| 13 | p.Alal3Lys | 3029  | 1313 | 3.85 | 3.69  | -9.89E-02 | Neutral       | -9.89E-02 | Neutral       |
| 13 | p.Alal3Thr | 3969  | 1691 | 5.05 | 4.75  | -2.47E-02 | Neutral       | -2.47E-02 | Neutral       |
| 13 | p.Alal3Arg | 4846  | 1789 | 6.17 | 5.03  | -7.73E-04 | Neutral       | -7.73E-04 | Neutral       |
| 13 | p.Alal3Ser | 6020  | 2315 | 7.66 | 6.51  | -4.26E-04 | Neutral       | -4.26E-04 | Neutral       |
| 13 | p.Alal3Ile | 3905  | 1553 | 4.97 | 4.37  | -9.58E-03 | Neutral       | -9.58E-03 | Neutral       |
| 13 | p.Alal3Met | 5301  | 1446 | 6.75 | 9.69  | -8.15E-01 | Neutral       | -8.15E-01 | Neutral       |
| 13 | p.Alal3His | 3118  | 1431 | 3.97 | 4.02  | -1.69E-01 | Neutral       | -1.69E-01 | Neutral       |
| 13 | p.Alal3Gln | 3692  | 1490 | 4.70 | 4.19  | -1.59E-02 | Neutral       | -1.59E-02 | Neutral       |
| 13 | p.Alal3Pro | 4393  | 1429 | 5.59 | 4.02  | -1.21E-04 | Neutral       | -1.21E-04 | Neutral       |
| 13 | p.Alal3Leu | 2886  | 1301 | 3.67 | 3.66  | -1.84E-01 | Neutral       | -1.84E-01 | Neutral       |
| 13 | p.Alal3Asp | 4736  | 1965 | 6.03 | 5.52  | -6.79E-03 | Neutral       | -6.79E-03 | Neutral       |
| 13 | p.Alal3Glu | 3561  | 1393 | 4.53 | 3.92  | -1.19E-02 | Neutral       | -1.19E-02 | Neutral       |
| 13 | p.Alal3Ala | 3906  | 497  | 2377 | 6.68  | -1.06E+00 | Neutral       | -1.06E+00 | Neutral       |
| 13 | p.Alal3Gly | 3294  | 1146 | 4.19 | 3.22  | -2.68E-03 | Neutral       | -2.68E-03 | Neutral       |
| 13 | p.Alal3Val | 3458  | 1473 | 4.40 | 4.14  | -4.60E-02 | Neutral       | -4.60E-02 | Neutral       |
| 13 | p.Alal3Tyr | 3988  | 2503 | 5.08 | 7.04  | -1.26E+00 | Neutral       | -1.26E+00 | Neutral       |
| 13 | p.Alal3Cys | 2683  | 1335 | 3.41 | 3.75  | -5.86E-01 | Neutral       | -5.86E-01 | Neutral       |
| 13 | p.Alal3Trp | 2538  | 1184 | 3.23 | 3.33  | -3.92E-01 | Neutral       | -3.92E-01 | Neutral       |
| 13 | p.Alal3Phe | 5038  | 2876 | 6.41 | 8.09  | -3.08E-01 | Neutral       | -3.08E-01 | Neutral       |
| 14 | p.Aspl4Asn | 3574  | 1772 | 3.96 | 3.01  | -3.70E+00 | Neutral       | -3.70E+0  |               |

|    |            |            |       |       |      |       |       |       |           |               |  |               |           |               |
|----|------------|------------|-------|-------|------|-------|-------|-------|-----------|---------------|--|---------------|-----------|---------------|
| 13 | p.Asp14Asp | Synonymous | 4511  | 2067  | 5.01 | 3.34  |       |       | -1.06E+00 | Neutral       |  |               | -1.06E+00 | Neutral       |
| 14 | p.Asp14Glu |            | 4387  | 1980  | 4.86 | 3.53  |       |       | -1.99E+00 | Neutral       |  |               | -1.99E+00 | Neutral       |
| 14 | p.Asp14Ala |            | 3103  | 1857  | 3.44 | 3.15  |       |       | -1.00E+01 | Indeterminate |  |               | -1.00E+01 | Indeterminate |
| 14 | p.Asp14Gly |            | 5701  | 2590  | 6.32 | 4.40  |       |       | -8.22E+01 | Neutral       |  |               | -8.22E+01 | Neutral       |
| 14 | p.Asp14Val |            | 5632  | 6061  | 6.24 | 10.29 |       |       | -3.17E+01 | Indeterminate |  |               | -3.13E+01 | Indeterminate |
| 14 | p.Asp14Tyr |            | 4781  | 4014  | 5.30 | 6.81  |       |       | -1.88E+01 | Indeterminate |  |               | -1.88E+01 | Indeterminate |
| 14 | p.Asp14Cys |            | 4284  | 1950  | 4.75 | 3.31  |       |       | -1.62E+00 | Neutral       |  |               | -1.62E+00 | Neutral       |
| 14 | p.Asp14Trp |            | 4208  | 3422  | 4.66 | 5.81  |       |       | -1.94E+01 | Indeterminate |  |               | -1.94E+01 | Indeterminate |
| 15 | p.Asp14Pro |            | 4096  | 3448  | 4.54 | 5.85  |       |       | -2.20E+01 | Indeterminate |  |               | -2.20E+01 | Indeterminate |
| 15 | p.Trp15Asn |            | 6806  | 1782  | 4.70 | 5.32  | 11345 | 3522  | 4.53      | 3.40          |  | Neutral       | -4.97E+00 | Neutral       |
| 15 | p.Trp15Lys |            | 7236  | 1725  | 5.00 | 5.15  | 13768 | 4227  | 5.49      | 4.09          |  | Neutral       | -2.58E+00 | Neutral       |
| 15 | p.Trp15Thr |            | 5550  | 1595  | 3.84 | 4.76  | 9633  | 4223  | 3.84      | 4.08          |  | Indeterminate | -1.13E+01 | Indeterminate |
| 15 | p.Trp15Arg |            | 5767  | 1195  | 3.99 | 3.57  | 9685  | 2686  | 3.86      | 2.60          |  | Neutral       | -1.65E+00 | Neutral       |
| 15 | p.Trp15Ser |            | 7958  | 1900  | 5.50 | 5.67  | 13848 | 4083  | 5.52      | 3.95          |  | Neutral       | -2.11E+00 | Neutral       |
| 15 | p.Trp15Ile |            | 7563  | 1034  | 3.98 | 3.09  | 9127  | 3846  | 3.64      | 3.72          |  | Neutral       | -1.11E+00 | Neutral       |
| 15 | p.Trp15Met |            | 5274  | 3033  | 3.64 | 3.03  | 9117  | 3643  | 3.64      | 2.52          |  | Neutral       | -1.86E+00 | Neutral       |
| 15 | p.Trp15His |            | 4145  | 1068  | 2.86 | 3.19  | 7396  | 5106  | 2.95      | 4.93          |  | Indeterminate | -2.39E+01 | Indeterminate |
| 15 | p.Trp15Gln |            | 7425  | 1883  | 5.13 | 5.62  | 12925 | 6246  | 5.16      | 6.04          |  | Neutral       | -4.61E+00 | Neutral       |
| 15 | p.Trp15Pro |            | 4346  | 1381  | 3.00 | 4.12  | 8773  | 5495  | 3.50      | 5.31          |  | Indeterminate | -2.78E+01 | Indeterminate |
| 15 | p.Trp15Leu |            | 12335 | 2792  | 8.52 | 8.34  | 22595 | 11054 | 9.01      | 10.68         |  | Neutral       | -5.23E+01 | Neutral       |
| 15 | p.Trp15Asp |            | 11922 | 2648  | 8.24 | 7.91  | 18631 | 8445  | 7.43      | 8.16          |  | Neutral       | -4.71E+01 | Neutral       |
| 15 | p.Trp15Glu |            | 10331 | 1960  | 7.14 | 5.85  | 16533 | 7828  | 6.60      | 7.57          |  | Neutral       | -2.89E+01 | Neutral       |
| 15 | p.Trp15Ala |            | 8846  | 2089  | 6.11 | 6.24  | 15101 | 4990  | 6.02      | 4.82          |  | Neutral       | -1.52E+00 | Neutral       |
| 15 | p.Trp15Gly |            | 5208  | 1067  | 3.60 | 3.19  | 9097  | 5665  | 3.63      | 5.48          |  | Indeterminate | -9.01E+00 | Indeterminate |
| 15 | p.Trp15Val |            | 4607  | 847   | 4.00 | 3.18  | 7933  | 2119  | 3.16      | 2.05          |  | Neutral       | -1.17E+02 | Neutral       |
| 15 | p.Trp15Tyr |            | 8482  | 2468  | 5.86 | 7.37  | 14113 | 5497  | 5.63      | 5.31          |  | Neutral       | -5.94E+00 | Indeterminate |
| 15 | p.Trp15Cys |            | 6277  | 1646  | 4.34 | 4.91  | 12412 | 4374  | 4.95      | 4.23          |  | Indeterminate | -7.76E+00 | Neutral       |
| 15 | p.Trp15Trp | Synonymous | 6045  | 1051  | 4.18 | 3.14  | 9713  | 4153  | 3.87      | 4.01          |  | Neutral       | -8.18E+01 | Neutral       |
| 15 | p.Trp15Phe |            | 10391 | 2331  | 7.18 | 6.96  | 18937 | 6268  | 7.55      | 6.06          |  | Neutral       | -6.10E+01 | Neutral       |
| 16 | p.Leu16Asn |            | 5055  | 6743  | 4.59 | 5.25  |       |       | -5.32E+01 | Deleterious   |  |               | -5.32E+01 | Deleterious   |
| 16 | p.Leu16Lys |            | 5427  | 16967 | 8.15 | 13.21 |       |       | -5.32E+01 | Deleterious   |  |               | -5.32E+01 | Deleterious   |
| 16 | p.Leu16Trp |            | 2209  | 660   | 3.32 | 0.51  |       |       | -2.76E+01 | Indeterminate |  |               | -2.76E+01 | Indeterminate |
| 16 | p.Leu16Arg | Pathogenic | 3583  | 13291 | 5.38 | 10.35 |       |       | -5.32E+01 | Deleterious   |  |               | -5.32E+01 | De            |

|    |            |       |       |      |       |           |               |      |           |               |               |           |               |           |               |
|----|------------|-------|-------|------|-------|-----------|---------------|------|-----------|---------------|---------------|-----------|---------------|-----------|---------------|
| 21 | p.Ala21Leu | 375   | 1034  | 8.19 | 1.58  | -5.31E+00 | Neutral       |      | -5.31E+00 | Neutral       |               |           |               |           |               |
| 21 | p.Ala21Asp | 2436  | 9530  | 5.31 | 14.60 | -5.32E+01 | Deleterious   |      | -5.32E+01 | Deleterious   |               |           |               |           |               |
| 21 | p.Ala21Glu | 1636  | 2674  | 3.57 | 4.10  | -5.32E+01 | Deleterious   |      | -5.32E+01 | Deleterious   |               |           |               |           |               |
| 21 | p.Ala21Ala | 1979  | 331   | 4.31 | 0.51  | -1.06E+00 | Neutral       |      | -1.06E+00 | Neutral       |               |           |               |           |               |
| 21 | p.Ala21Val | 2395  | 390   | 5.22 | 0.60  | -5.23E+01 | Neutral       |      | -5.23E+01 | Neutral       |               |           |               |           |               |
| 21 | p.Ala21Gly | 2784  | 547   | 6.07 | 0.84  | -1.47E+00 | Neutral       |      | -1.47E+00 | Neutral       |               |           |               |           |               |
| 21 | p.Ala21Tyr | 2718  | 3295  | 5.93 | 5.05  | -5.32E+01 | Deleterious   |      | -5.32E+01 | Deleterious   |               |           |               |           |               |
| 21 | p.Ala21Cys | 2659  | 468   | 5.80 | 0.72  | -7.45E+01 | Neutral       |      | -7.45E+01 | Neutral       |               |           |               |           |               |
| 21 | p.Ala21Tlp | 2399  | 3082  | 5.23 | 4.72  | -5.32E+01 | Deleterious   |      | -5.32E+01 | Deleterious   |               |           |               |           |               |
| 21 | p.Ala21Phe | 1984  | 1999  | 4.33 | 3.06  | -5.32E+01 | Deleterious   |      | -5.32E+01 | Deleterious   |               |           |               |           |               |
| 22 | p.Arg22Asn | 1177  | 1020  | 8.01 | 2.54  | -1.24E-07 | Neutral       |      | -1.24E-07 | Neutral       |               |           |               |           |               |
| 22 | p.Arg22Lys | 1049  | 2391  | 7.14 | 5.96  | -1.44E+00 | Neutral       |      | -1.44E+00 | Neutral       |               |           |               |           |               |
| 22 | p.Arg22Thr | 1153  | 5650  | 7.85 | 14.09 | -2.77E+01 | Indeterminate |      | -2.77E+01 | Indeterminate |               |           |               |           |               |
| 22 | p.Arg22Arg | 1233  | 2837  | 8.39 | 7.08  | -1.06E+00 | Neutral       |      | -1.06E+00 | Neutral       |               |           |               |           |               |
| 22 | p.Arg22Ser | 473   | 1630  | 3.22 | 4.07  | -2.39E+01 | Indeterminate |      | -2.39E+01 | Indeterminate |               |           |               |           |               |
| 22 | p.Arg22Ile | 819   | 1627  | 5.58 | 4.06  | -9.80E+01 | Neutral       |      | -9.80E+01 | Neutral       |               |           |               |           |               |
| 22 | p.Arg22Met | 1029  | 3315  | 7.01 | 8.27  | -8.42E+00 | Deleterious   |      | -8.42E+00 | Deleterious   |               |           |               |           |               |
| 22 | p.Arg22His | 338   | 167   | 2.30 | 0.42  | -2.42E-09 | Neutral       |      | -2.28E-09 | Neutral       |               |           |               |           |               |
| 22 | p.Arg22Gln | 1275  | 1139  | 8.68 | 2.84  | -1.37E-07 | Neutral       |      | -1.37E-07 | Neutral       |               |           |               |           |               |
| 22 | p.Arg22Pro | 424   | 6555  | 2.89 | 16.35 | -5.32E+01 | Deleterious   |      | -5.32E+01 | Deleterious   |               |           |               |           |               |
| 22 | p.Arg22Leu | 617   | 764   | 4.20 | 1.91  | -1.65E-02 | Neutral       |      | -1.65E-02 | Neutral       |               |           |               |           |               |
| 22 | p.Arg22Asp | 324   | 671   | 2.21 | 1.67  | -6.69E+00 | Indeterminate |      | -6.69E+00 | Indeterminate |               |           |               |           |               |
| 22 | p.Arg22Glu | 737   | 522   | 5.02 | 1.30  | -3.73E-08 | Neutral       |      | -3.72E-08 | Neutral       |               |           |               |           |               |
| 22 | p.Arg22Ala | 310   | 287   | 2.11 | 0.72  | -6.27E-03 | Neutral       |      | -6.27E-03 | Neutral       |               |           |               |           |               |
| 22 | p.Arg22Gly | 323   | 2465  | 2.20 | 6.15  | -5.32E+01 | Deleterious   |      | -5.32E+01 | Deleterious   |               |           |               |           |               |
| 22 | p.Arg22Val | 312   | 367   | 2.12 | 0.92  | -1.56E+01 | Neutral       |      | -1.56E+01 | Neutral       |               |           |               |           |               |
| 22 | p.Arg22Tyr | 596   | 1333  | 4.06 | 3.32  | -3.79E+00 | Neutral       |      | -3.79E+00 | Neutral       |               |           |               |           |               |
| 22 | p.Arg22Cys | 639   | 324   | 4.35 | 0.81  | -1.16E-11 | Neutral       |      | 0.00E+00  | Neutral       |               |           |               |           |               |
| 22 | p.Arg22Trp | 1319  | 4784  | 8.98 | 11.93 | -9.64E+00 | Indeterminate |      | -9.64E+00 | Indeterminate |               |           |               |           |               |
| 22 | p.Arg22Phe | 542   | 2250  | 3.69 | 5.61  | -3.42E+01 | Indeterminate |      | -3.26E+01 | Indeterminate |               |           |               |           |               |
| 23 | p.Gly23Asn | 1971  | 217   | 4.60 | 0.67  | -2.16E+01 | Indeterminate |      | -2.16E+01 | Indeterminate |               |           |               |           |               |
| 23 | p.Gly23Lys | 2291  | 2054  | 5.34 | 6.32  | -5.32E+01 | Deleterious   |      | -5.32E+01 | Deleterious   |               |           |               |           |               |
| 23 | p.Gly23Ile | 2549  | 2313  | 5.94 | 7.12  | -5.32E+01 | Deleterious   |      | -5.32E+01 | Deleterious   |               |           |               |           |               |
| 23 | p.Gly23Arg | 2176  | 1816  | 5.07 | 5.59  | -5.32E+01 | Deleterious   |      | -5.32E+01 | Deleterious   |               |           |               |           |               |
| 23 | p.Gly23Ser | 1609  | 285   | 3.75 | 0.88  | -5.32E+01 | Deleterious   |      | -5.32E+01 | Deleterious   |               |           |               |           |               |
| 23 | p.Gly23Ile | 2654  | 2752  | 6.19 | 8.47  | -5.32E+01 | Deleterious   |      | -5.32E+01 | Deleterious   |               |           |               |           |               |
| 23 | p.Gly23Met | 2276  | 2025  | 5.31 | 6.23  | -5.32E+01 | Deleterious   |      | -5.32E+01 | Deleterious   |               |           |               |           |               |
| 23 | p.Gly23His | 2587  | 2185  | 6.03 | 6.72  | -5.32E+01 | Deleterious   |      | -5.32E+01 | Deleterious   |               |           |               |           |               |
| 23 | p.Gly23Gln | 2634  | 2152  | 6.14 | 6.62  | -5.32E+01 | Deleterious   |      | -5.32E+01 | Deleterious   |               |           |               |           |               |
| 23 | p.Gly23Pro | 2042  | 1771  | 4.76 | 5.45  | -5.32E+01 | Deleterious   |      | -5.32E+01 | Deleterious   |               |           |               |           |               |
| 23 | p.Gly23Leu | 724   | 160   | 2.25 | 0.55  | -5.32E+01 | Deleterious   |      | -5.32E+01 | Deleterious   |               |           |               |           |               |
| 23 | p.Gly23Asp | 1669  | 1066  | 3.89 | 3.28  | -5.32E+01 | Deleterious   |      | -5.32E+01 | Deleterious   |               |           |               |           |               |
| 23 | p.Gly23Glu | 2812  | 2666  | 6.56 | 8.20  | -5.32E+01 | Deleterious   |      | -5.32E+01 | Deleterious   |               |           |               |           |               |
| 23 | p.Gly23Ala | 1966  | 112   | 4.58 | 0.34  | -1.29E+00 | Neutral       |      | -1.29E+00 | Neutral       |               |           |               |           |               |
| 23 | p.Gly23Gly | 1029  | 46    | 2.40 | 0.14  | -1.06E+00 | Neutral       |      | -1.06E+00 | Neutral       |               |           |               |           |               |
| 23 | p.Gly23Val | 2948  | 2588  | 6.87 | 7.96  | -5.32E+01 | Deleterious   |      | -5.32E+01 | Deleterious   |               |           |               |           |               |
| 23 | p.Gly23Tyr | 1763  | 1578  | 4.11 | 4.85  | -5.32E+01 | Deleterious   |      | -5.32E+01 | Deleterious   |               |           |               |           |               |
| 23 | p.Gly23Cys | 2210  | 1286  | 5.15 | 3.96  | -5.32E+01 | Deleterious   |      | -5.32E+01 | Deleterious   |               |           |               |           |               |
| 23 | p.Gly23Phe | 2196  | 2273  | 5.12 | 6.99  | -5.32E+01 | Deleterious   |      | -5.32E+01 | Deleterious   |               |           |               |           |               |
| 23 | p.Gly23Phe | 2187  | 2593  | 6.50 | 7.98  | -5.32E+01 | Deleterious   |      | -5.32E+01 | Deleterious   |               |           |               |           |               |
| 24 | p.Arg24Asn | 2933  | 1156  | 4.19 | 2.75  | 7521      | 6903          | 4.31 | 3.38      | -9.14E-02     | Neutral       | -1.70E+00 | Neutral       | -6.25E-01 | Neutral       |
| 24 | p.Arg24Lys | 3506  | 1119  | 5.01 | 2.66  | 8038      | 8566          | 4.61 | 4.19      | -1.60E-03     | Neutral       | -3.49E+00 | Neutral       | -1.72E+00 | Neutral       |
| 24 | p.Arg24Thr | 3180  | 1226  | 4.54 | 2.92  | 6972      | 8076          | 4.00 | 3.95      | -4.97E-02     | Neutral       | -6.38E+00 | Neutral       | -3.98E+00 | Neutral       |
| 24 | p.Arg24Arg | 3351  | 1793  | 4.79 | 4.27  | 8843      | 7900          | 5.07 | 3.91      | -1.06E+00     | Neutral       | -1.06E+00 | Neutral       | -8.18E-01 | Neutral       |
| 24 | p.Arg24Ser | 3650  | 1131  | 5.21 | 2.69  | 8814      | 7806          | 5.06 | 3.82      | -7.40E-04     | Neutral       | -9.24E-01 | Neutral       | -2.10E-01 | Neutral       |
| 24 | p.Arg24Ile | 2629  | 1067  | 2.54 | 2.54  | 6448      | 5232          | 3.70 | 2.56      | -1.91E+01     | Neutral       | -1.04E+00 | Neutral       | -3.42E-01 | Neutral       |
| 24 | p.Arg24Met | 2651  | 1815  | 5.36 | 4.42  | 9777      | 9768          | 5.72 | 4.78      | -3.40E+01     | Neutral       | -1.40E+00 | Neutral       | -6.00E-01 | Neutral       |
| 24 | p.Arg24His | 3570  | 1006  | 5.10 | 2.39  | 9360      | 7018          | 5.37 | 3.44      | -1.29E-04     | Neutral       | -1.72E-01 | Neutral       | -9.56E-03 | Neutral       |
| 24 | p.Arg24Gln | 3595  | 2952  | 5.14 | 7.02  | 8545      | 12341         | 4.90 | 6.04      | -8.69E-02     | Indeterminate | -1.14E+01 | Indeterminate | -1.62E+01 | Indeterminate |
| 24 | p.Arg24Pro | 2814  | 13992 | 4.02 | 33.29 | 7157      | 46361         | 4.11 | 22.70     | -5.32E+01     | Deleterious   | -5.32E+01 | Deleterious   | -5.32E+01 | Deleterious   |
| 24 | p.Arg24Leu | 2863  | 1249L | 4.09 | 2.97  | 7372      | 7029          | 4.23 | 3.44      | -2.98E-01     | Neutral       | -2.23E+00 | Neutral       | -1.07E+00 | Neutral       |
| 24 | p.Arg24Asp | 3473  | 1883  | 6.77 | 4.48  | 12409     | 9485          | 7.12 | 4.64      | -1.18E-02     | Neutral       | -7.32E-02 | Neutral       | -2.41E-03 | Neutral       |
| 24 | p.Arg24Glu | 3650  | 1301  | 5.21 | 3.09  | 8804      | 9043          | 5.05 | 4.43      | -8.28E-03     | Neutral       | -2.43E+00 | Neutral       | -1.01E+00 | Neutral       |
| 24 | p.Arg24Ala | 3163  | 902   | 4.52 | 2.15  | 8126      | 6212          | 4.66 | 3.04      | -3.62E+04     | Neutral       | -3.36E-01 | Neutral       | -3.41E+00 | Neutral       |
| 24 | p.Arg24Gly | 2844  | 1050  | 4.06 | 2.50  | 7234      | 8057          | 4.15 | 3.94      | -4.58E-02     | Neutral       | -5.10E+00 | Neutral       | -2.96E+00 | Neutral       |
| 24 | p.Arg24Val | 4782  | 1725  | 6.83 | 4.10  | 11195     | 10279         | 6.42 | 5.03      | -2.26E-03     | Neutral       | -6.60E-01 | Neutral       | -1.17E-01 | Neutral       |
| 24 | p.Arg24Tyr | 3352  | 1179  | 4.79 | 2.80  | 8524      | 8763          | 4.89 | 4.29      | -1.05E-02     | Neutral       | -2.60E+00 | Neutral       | -1.12E+00 | Neutral       |
| 24 | p.Arg24Cys | 2826  | 1270  | 4.04 | 3.02  | 6942      | 4683          | 3.98 | 2.29      | -4.09E-01     | Neutral       | -1.61E-01 | Neutral       | -8.97E-02 | Neutral       |
| 24 | p.Arg24Trp | 4945  | 2525  | 7.06 | 6.01  | 11886     | 12036         | 6.82 | 5.89      | -2.34E-01     | Neutral       | -1.19E+00 | Neutral       | -4.32E-01 | Neutral       |
| 24 | p.Arg24Phe | 3862  | 1694  | 5.52 | 4.03  | 10145     | 8607          | 5.82 | 4.21      | -1.10E-01     | Neutral       | -4.45E-01 | Neutral       | -8.53E-02 | Neutral       |
| 25 | p.Val25Asn | 8478  | 1522  | 4.84 | 3.94  | -4.24E+00 | Neutral       |      |           | -4.24E+00     | Neutral       |           |               | -4.24E+00 | Neutral       |
| 25 | p.Val25Lys | 9210  | 2493  | 6.45 | 5.25  | -1.78E+00 | Indeterminate |      |           | -1.78E+00     | Indeterminate |           |               | -1.78E+00 | Indeterminate |
| 25 | p.Val25Thr | 8108  | 1182  | 4.82 | 3.06  | -1.42E+00 | Indeterminate |      |           | -1.42E+00     | Indeterminate |           |               | -1.42E+00 | Indeterminate |
| 25 | p.Val25Arg | 13506 | 2689  | 7.70 | 6.96  | -3.28E+00 | Neutral       |      |           | -3.28E+00     | Neutral       |           |               | -3.28E+00 | Neutral       |
| 25 | p.Val25Ser | 8701  | 1111  | 4.96 | 2.87  | -4.26E-01 | Neutral       |      |           | -4.26E-01     | Neutral       |           |               | -4.26E-01 | Neutral       |
| 25 | p.Val25Ile | 6987  | 845   | 3.98 | 2.19  | -5.01E-01 | Neutral       |      |           | -5.01E-01     | Neutral       |           |               | -5.01E-01 | Neutral       |
| 25 | p.Val25Met | 10879 | 3296  | 6.20 | 8.53  | -2.10E+01 | Indeterminate |      |           | -2.10E+01     | Indeterminate |           |               | -2.10E+01 | Indeterminate |
| 25 | p.Val25His | 7159  | 812   | 4.08 | 2.10  | -2.56E-01 | Neutral       |      |           | -2.56E-01     | Neutral       |           |               | -2.56E-01 | Neutral       |
| 25 | p.Val25Gln | 5328  | 992   | 3.04 | 1.53  | -5.25E-01 | Neutral       |      |           | -5.25E-01     | Neutral       |           |               | -5.25E-01 | Neutral       |
| 25 | p.Val25Pro | 4054  | 267   | 0.69 | 0.69  | -1.91E+01 | Neutral       |      |           | -1.91E+01     | Neutral       |           |               | -1.91E+01 | Neutral       |
| 25 | p.Val25Leu | 4540  | 391   | 2.59 | 1.01  | -6.34E-02 | Neutral       |      |           | -6.34E-02     | Neutral       |           |               | -6.34E-02 | Neutral       |
| 25 | p.Val25Asp | 11884 | 3484  | 6.78 | 9.01  | -1.76E+01 | Indeterminate |      |           | -1.76E+01     | Indeterminate |           |               | -1.76E+01 | Indeterminate |
| 25 | p.Val25Glu | 11601 | 1495  | 6.62 | 3.87  | -1.83E-01 | Neutral       |      |           | -1.83E-01     | Neutral       |           |               | -1.83E-01 | Neutral       |
| 25 | p.Val25Ala | 6216  | 5757  | 3.55 | 14.90 | -5.32E+01 | Deleterious   |      |           | -5.32E+01     | Deleterious   |           |               | -5.32E+01 | Deleterious   |
| 25 | p.Val25Gly | 10784 | 3197  | 6.15 | 8.27  | -1.99E+01 | Indeterminate |      |           | -1.99E+01     | Indeterminate |           |               | -1.99E+01 | Indeterminate |
| 25 | p.Val25Val | 9182  | 1337  | 5.24 | 3.46  | -1.06E+00 | Neutral       |      |           | -1.06E+00     | Neutral       |           |               | -1.06E+00 | Neutral       |
| 25 | p.Val25Tyr | 9422  | 3948  | 5.37 | 10.21 | -5.20E-01 | Indeterminate |      |           | -5.20E-01     | Indeterminate |           |               | -3.32E-01 | Indeterminate |
| 25 | p.Val25Cys | 9741  | 871   | 2.57 | 0.43  | -2.47E-03 | Neutral       |      |           | -2.47E-03     | Neutral       |           |               | -2.47E-03 | Neutral       |
| 25 | p.Val25Trp | 11563 | 2037  | 6.59 | 5.27  | -2.22E+00 | Neutral       |      |           | -2.22E+00     | Neutral       |           |               | -2.22E+00 | Neutral       |
| 25 | p.Val25Phe | 7991  | 1324  | 4.56 | 3.43  | -3.13E+00 | Neutral       |      |           | -3.13E+00     | Neutral       |           |               | -3.13E+00 | Neutral       |
| 26 | p.Glu26Asn | 2618  | 1398  | 2.56 | 2.14  | -1.41E+00 | Neutral       |      |           | -1.41E+00     | Neutral       |           |               | -1.41E+00 | Neutral       |
| 26 | p.Glu26Lys | 4162  | 2229  | 4.06 | 3.42  | -4.39E-01 | Neutral       |      |           | -4.39E-01     | Neutral       |           |               | -4.39E-01 | Neutral       |
| 26 | p.Glu26Thr | 1175  | 706   | 1.15 | 1.08  | -9.37E+00 | Indeterminate |      |           | -9.37E+00     | Indeterminate |           |               | -9.37E+00 | Indeterminate |
| 26 | p.Glu26Arg | 8484  | 4992  | 8.28 | 7.65  | -1.02E+01 | Neutral       |      |           | -1.02E+01     | Neutral       |           |               | -1.02E+01 | Neutral       |
| 26 | p.Glu26Ser | 903   | 705   | 0.88 | 1.08  | -2.74E+01 | Indeterminate |      |           | -2.74E+01     | Indeterminate |           |               | -2.74E+01 | Indeterminate |
| 26 | p.Glu26Ile | 6233  | 3893  | 5.97 | 5.97  | -5.21E+00 | Neutral       |      |           | -5.21E+00     | Neutral       |           |               | -5.21E+00 | Neutral       |
| 26 | p.Glu26Met | 5772  | 3272  | 5.64 | 5.02  | -2.70E-01 | Neutral       |      |           | -2.70E-01     | Neutral       |           |               | -2.70E-01 | Neutral       |
| 26 | p.Glu26His | 3306  | 2308  | 3.23 | 3.54  | -4.15E+00 | Neutral       |      |           | -4.15E+00     | Neutral       |           |               | -4.15E+00 | Neutral       |
| 26 | p.Glu26Gln | 4189  | 2887  | 4.09 | 4.43  | -2.58E+00 | Neutral       |      |           | -2.58E+00     | Neutral       |           |               | -2.58E+00 | Neutral       |
| 26 | p.Glu26Pro | 9408  | 6512  | 9.19 | 9.98  | -3.86E-01 | Neutral       |      |           | -3.86E-01     | Neutral       |           |               | -3.86E-01 | Neutral       |
| 26 | p.Glu26Leu | 4257  | 2348  | 4.16 | 3.60  | -5.32E+01 | Neutral       |      |           | -5.32E+01     | Neutral       |           |               | -5.32E+01 | Neutral       |
| 26 | p.Glu26Asp | 3303  | 2162  | 3.23 | 3.31  | -3.00E+00 | Neutral       |      |           | -3.00E+00     | Neutral       |           |               | -3.00E+00 | Neutral       |
| 26 | p.Glu26Glu | 2487  | 3596  | 5.36 | 5.51  | -1.06E+00 | Neutral       |      |           | -1.06E+00     | Neutral       |           |               | -1.06E+00 | Neutral       |

|    |            |       |       |       |       |           |               |           |               |
|----|------------|-------|-------|-------|-------|-----------|---------------|-----------|---------------|
| 28 | p.Val28Pro | 8623  | 12625 | 4.40  | 7.79  | -5.32E+01 | Deleterious   | -5.32E+01 | Deleterious   |
| 28 | p.Val28Leu | 11339 | 1580  | 5.79  | 0.98  | -2.63E-03 | Neutral       | -2.63E-03 | Neutral       |
| 28 | p.Val28Asp | 10547 | 15278 | 5.38  | 9.43  | -5.32E+01 | Deleterious   | -5.32E+01 | Deleterious   |
| 28 | p.Val28Glu | 12987 | 12241 | 6.63  | 7.56  | -5.32E+01 | Deleterious   | -5.32E+01 | Deleterious   |
| 28 | p.Val28Ala | 11044 | 1828  | 5.64  | 1.13  | -4.21E-02 | Neutral       | -4.21E-02 | Neutral       |
| 28 | p.Val28Gly | 8378  | 3399  | 4.28  | 2.10  | -2.04E+01 | Indeterminate | -2.04E+01 | Indeterminate |
| 28 | p.Val28Val | 11421 | 2640  | 5.83  | 1.63  | -1.06E+00 | Neutral       | -1.06E+00 | Neutral       |
| 28 | p.Val28Tyr | 8913  | 13513 | 4.55  | 8.34  | -5.32E+01 | Deleterious   | -5.32E+01 | Deleterious   |
| 28 | p.Val28Cys | 8264  | 1344  | 4.22  | 0.83  | -1.12E-01 | Neutral       | -1.12E-01 | Neutral       |
| 28 | p.Val28Trp | 11572 | 19076 | 5.91  | 11.77 | -5.32E+01 | Deleterious   | -5.32E+01 | Deleterious   |
| 28 | p.Val28Phe | 9745  | 10542 | 4.97  | 6.51  | -5.32E+01 | Deleterious   | -5.32E+01 | Deleterious   |
| 29 | p.Arg29Asn | 20602 | 4626  | 6.41  | 6.71  | -1.64E+00 | Neutral       | -4.64E+00 | Neutral       |
| 29 | p.Arg29Lys | 20053 | 2816  | 6.24  | 4.08  | -1.73E-01 | Neutral       | -1.73E-01 | Neutral       |
| 29 | p.Arg29Thr | 12052 | 2884  | 3.75  | 4.18  | -1.21E+01 | Indeterminate | -1.21E+01 | Indeterminate |
| 29 | p.Arg29Arg | 17229 | 2824  | 5.36  | 4.09  | -1.06E+00 | Neutral       | -1.06E+00 | Neutral       |
| 29 | p.Arg29Ser | 32631 | 6359  | 10.16 | 9.22  | -7.93E-01 | Neutral       | -7.93E-01 | Neutral       |
| 29 | p.Arg29Ile | 15556 | 4861  | 4.84  | 7.05  | -2.12E+01 | Indeterminate | -2.12E+01 | Indeterminate |
| 29 | p.Arg29Met | 16707 | 2888  | 5.20  | 4.19  | -1.63E+00 | Neutral       | -1.63E+00 | Neutral       |
| 29 | p.Arg29His | 7538  | 1143  | 2.35  | 1.66  | -3.49E+00 | Neutral       | -3.49E+00 | Neutral       |
| 29 | p.Arg29Gln | 19103 | 2763  | 5.95  | 4.01  | -2.77E-01 | Neutral       | -2.77E-01 | Neutral       |
| 29 | p.Arg29Pro | 4160  | 10588 | 1.30  | 15.35 | -5.32E+01 | Deleterious   | -5.32E+01 | Deleterious   |
| 29 | p.Arg29Leu | 19150 | 3168  | 5.96  | 4.59  | -8.77E-01 | Neutral       | -8.77E-01 | Neutral       |
| 29 | p.Arg29Asp | 17057 | 5258  | 5.31  | 7.62  | -1.87E+01 | Indeterminate | -1.87E+01 | Indeterminate |
| 29 | p.Arg29Glu | 13773 | 2739  | 4.29  | 3.97  | -4.92E+00 | Neutral       | -4.92E+00 | Neutral       |
| 29 | p.Arg29Ala | 17777 | 1898  | 5.53  | 2.75  | -7.71E-03 | Neutral       | -7.71E-03 | Neutral       |
| 29 | p.Arg29Gly | 19312 | 3544  | 6.01  | 5.14  | -1.76E+00 | Neutral       | -1.76E+00 | Neutral       |
| 29 | p.Arg29Val | 10545 | 1606  | 3.28  | 2.33  | -1.92E+00 | Neutral       | -1.92E+00 | Neutral       |
| 29 | p.Arg29Tyr | 18295 | 570   | 3.77  | 2.72  | -2.72E-01 | Neutral       | -2.72E-01 | Neutral       |
| 29 | p.Arg29Cys | 22937 | 4095  | 7.14  | 5.94  | -9.90E-01 | Neutral       | -9.90E-01 | Neutral       |
| 29 | p.Arg29Trp | 9347  | 1224  | 2.91  | 1.77  | -9.07E-01 | Neutral       | -9.07E-01 | Neutral       |
| 29 | p.Arg29Phe | 7409  | 1098  | 2.31  | 1.59  | -3.19E+00 | Neutral       | -3.19E+00 | Neutral       |
| 30 | p.Ala30Asn | 21267 | 13488 | 5.27  | 11.35 | -5.32E+01 | Deleterious   | -5.32E+01 | Deleterious   |
| 30 | p.Ala30Lys | 17443 | 2724  | 4.32  | 2.29  | -1.25E+00 | Neutral       | -1.25E+00 | Neutral       |
| 30 | p.Ala30Thr | 24071 | 8424  | 5.96  | 7.09  | -2.40E+01 | Indeterminate | -2.40E+01 | Indeterminate |
| 30 | p.Ala30Arg | 26854 | 5725  | 6.65  | 4.83  | -3.40E+00 | Neutral       | -3.40E+00 | Neutral       |
| 30 | p.Ala30Ser | 20268 | 5206  | 5.02  | 4.38  | -1.11E+01 | Indeterminate | -1.11E+01 | Indeterminate |
| 30 | p.Ala30Ile | 18034 | 4333  | 4.47  | 3.64  | -1.00E+01 | Indeterminate | -1.00E+01 | Indeterminate |
| 30 | p.Ala30Met | 27133 | 6428  | 6.72  | 5.41  | -5.52E+00 | Neutral       | -5.52E+00 | Neutral       |
| 30 | p.Ala30His | 18096 | 3956  | 4.48  | 3.33  | -6.94E+00 | Indeterminate | -6.94E+00 | Indeterminate |
| 30 | p.Ala30Gln | 18462 | 4653  | 4.57  | 3.91  | -1.15E+01 | Indeterminate | -1.15E+01 | Indeterminate |
| 30 | p.Ala30Pro | 18318 | 9216  | 4.54  | 7.75  | -5.32E+01 | Deleterious   | -5.32E+01 | Deleterious   |
| 30 | p.Ala30Leu | 14439 | 3198  | 3.58  | 2.69  | -9.74E+00 | Indeterminate | -9.74E+00 | Indeterminate |
| 30 | p.Ala30Asp | 11706 | 4156  | 2.90  | 3.50  | -3.46E+01 | Indeterminate | -3.32E+01 | Indeterminate |
| 30 | p.Ala30Glu | 21369 | 1913  | 5.30  | 3.29  | -2.24E+00 | Neutral       | -2.24E+00 | Neutral       |
| 30 | p.Ala30Ala | 25468 | 4405  | 6.31  | 3.71  | -1.06E+00 | Neutral       | -1.06E+00 | Neutral       |
| 30 | p.Ala30Gly | 17570 | 10117 | 4.35  | 8.51  | -5.32E+01 | Deleterious   | -5.32E+01 | Deleterious   |
| 30 | p.Ala30Val | 33236 | 8979  | 8.24  | 7.55  | -7.22E+00 | Indeterminate | -7.22E+00 | Indeterminate |
| 30 | p.Ala30Tyr | 16045 | 5032  | 3.98  | 4.23  | -2.56E+01 | Indeterminate | -2.56E+01 | Indeterminate |
| 30 | p.Ala30Cys | 15100 | 4355  | 3.74  | 3.66  | -2.15E+01 | Indeterminate | -2.15E+01 | Indeterminate |
| 30 | p.Ala30Trp | 26402 | 7996  | 6.54  | 6.73  | -1.43E+01 | Indeterminate | -1.43E+01 | Indeterminate |
| 30 | p.Ala30Phe | 12276 | 2580  | 3.04  | 2.17  | -9.80E+00 | Indeterminate | -9.80E+00 | Indeterminate |
| 31 | p.Leu31Asn | 17658 | 3677  | 4.70  | 3.62  | -1.58E+01 | Indeterminate | -1.58E+01 | Indeterminate |
| 31 | p.Leu31Lys | 22252 | 3043  | 5.93  | 3.00  | -1.84E+00 | Neutral       | -1.84E+00 | Neutral       |
| 31 | p.Leu31Thr | 16130 | 2611  | 4.30  | 2.57  | -7.23E+00 | Indeterminate | -7.23E+00 | Indeterminate |
| 31 | p.Leu31Arg | 19399 | 2812  | 5.17  | 2.77  | -3.31E+00 | Neutral       | -3.31E+00 | Neutral       |
| 31 | p.Leu31Ser | 18159 | 3537  | 4.84  | 3.49  | -1.24E+01 | Indeterminate | -1.24E+01 | Indeterminate |
| 31 | p.Leu31Ile | 26461 | 3657  | 7.05  | 3.61  | -1.36E+00 | Neutral       | -1.36E+00 | Neutral       |
| 31 | p.Leu31Met | 25568 | 4775  | 6.81  | 4.71  | -6.95E+00 | Indeterminate | -6.95E+00 | Indeterminate |
| 31 | p.Leu31His | 14102 | 2056  | 3.76  | 2.03  | -5.62E+00 | Neutral       | -5.62E+00 | Neutral       |
| 31 | p.Leu31Gln | 20265 | 4695  | 5.40  | 4.63  | -1.90E+01 | Indeterminate | -1.90E+01 | Indeterminate |
| 31 | p.Leu31Pro | 18066 | 30967 | 4.81  | 30.53 | -5.32E+01 | Deleterious   | -5.32E+01 | Deleterious   |
| 31 | p.Leu31Leu | 29114 | 4009  | 7.76  | 3.95  | -1.06E+00 | Neutral       | -1.06E+00 | Neutral       |
| 31 | p.Leu31Asp | 17841 | 8877  | 4.75  | 8.75  | -5.32E+01 | Deleterious   | -5.32E+01 | Deleterious   |
| 31 | p.Leu31Glu | 12731 | 2060  | 3.39  | 2.03  | -9.76E+00 | Indeterminate | -9.76E+00 | Indeterminate |
| 31 | p.Leu31Ala | 17448 | 3125  | 4.65  | 3.08  | -9.65E+00 | Indeterminate | -9.65E+00 | Indeterminate |
| 31 | p.Leu31Gly | 16782 | 2693  | 4.47  | 2.65  | -6.62E+00 | Indeterminate | -6.62E+00 | Indeterminate |
| 31 | p.Leu31Val | 16042 | 3588  | 4.27  | 3.54  | -2.14E+00 | Indeterminate | -2.14E+00 | Indeterminate |
| 31 | p.Leu31Tyr | 29006 | 7869  | 7.73  | 7.76  | -2.12E+01 | Indeterminate | -2.12E+01 | Indeterminate |
| 31 | p.Leu31Cys | 10884 | 2718  | 2.90  | 2.68  | -3.93E+01 | Indeterminate | -3.32E+01 | Indeterminate |
| 31 | p.Leu31Trp | 13277 | 2652  | 3.54  | 2.61  | -1.85E+01 | Indeterminate | -1.85E+01 | Indeterminate |
| 31 | p.Leu31Phe | 14121 | 2017  | 3.76  | 1.99  | -5.13E+00 | Neutral       | -5.13E+00 | Neutral       |
| 32 | p.Leu32Asn | 2757  | 2086  | 5.77  | 6.42  | -2.49E+01 | Indeterminate | -2.98E+01 | Indeterminate |
| 32 | p.Leu32Lys | 4132  | 3792  | 8.65  | 11.66 | -2.90E+01 | Indeterminate | -2.73E+01 | Indeterminate |
| 32 | p.Leu32Thr | 1677  | 990   | 3.51  | 3.05  | -1.98E+01 | Indeterminate | -3.76E-02 | Neutral       |
| 32 | p.Leu32Arg | 1636  | 1636  | 4.11  | 5.03  | -4.17E+01 | Indeterminate | -5.14E+01 | Neutral       |
| 32 | p.Leu32Ser | 2088  | 1649  | 4.37  | 5.07  | -3.51E+01 | Indeterminate | -4.41E+00 | Neutral       |
| 32 | p.Leu32Ile | 2006  | 586   | 4.20  | 1.80  | -4.47E-01 | Neutral       | -1.01E-04 | Neutral       |
| 32 | p.Leu32Met | 3442  | 1252  | 7.21  | 3.85  | -4.29E-01 | Neutral       | -1.11E-05 | Neutral       |
| 32 | p.Leu32His | 1717  | 1516  | 3.60  | 4.66  | -5.20E+01 | Indeterminate | -4.02E+01 | Indeterminate |
| 32 | p.Leu32Gln | 2563  | 1371  | 5.37  | 4.22  | -1457     | 756           | 6.21      | 5.07          |
| 32 | p.Leu32Pro | 4912  | 4768  | 10.29 | 14.67 | -1841     | 2065          | 7.84      | 13.85         |
| 32 | p.Leu32Leu | 1981  | 642   | 4.15  | 1.97  | 851       | 281           | 3.63      | 1.88          |
| 32 | p.Leu32Asp | 2011  | 1682  | 4.21  | 5.17  | 723       | 788           | 3.08      | 5.29          |
| 32 | p.Leu32Glu | 2518  | 2363  | 5.27  | 7.27  | 1148      | 1069          | 4.89      | 7.17          |
| 32 | p.Leu32Ala | 876   | 322   | 1.83  | 0.99  | 256       | 98            | 1.09      | 0.66          |
| 32 | p.Leu32Gly | 1595  | 1406  | 3.34  | 4.32  | 878       | 716           | 3.74      | 4.80          |
| 32 | p.Leu32Val | 3564  | 1243  | 7.46  | 3.82  | 1582      | 300           | 6.74      | 2.01          |
| 32 | p.Leu32Tyr | 1947  | 1414  | 4.08  | 4.35  | 1105      | 911           | 4.71      | 6.11          |
| 32 | p.Leu32Cys | 1419  | 550   | 2.97  | 1.69  | 793       | 133           | 3.38      | 0.89          |
| 32 | p.Leu32Trp | 2952  | 2525  | 6.18  | 7.77  | 1653      | 1521          | 7.04      | 10.20         |
| 32 | p.Leu32Phe | 1622  | 716   | 2.40  | 2.20  | 1208      | 288           | 5.15      | 1.93          |
| 33 | p.Glu33Asn | 2405  | 1987  | 6.29  | 6.03  | -1.19E-01 | Neutral       | -7.76E-03 | Neutral       |
| 33 | p.Glu33Lys | 2310  | 2125  | 6.04  | 6.45  | -4.10E-01 | Neutral       | -4.10E-01 | Neutral       |
| 33 | p.Glu33Thr | 2551  | 2244  | 6.67  | 6.81  | -1.92E-01 | Neutral       | -1.92E-01 | Neutral       |
| 33 | p.Glu33Arg | 323   | 265   | 0.84  | 0.80  | -9.24E+00 | Indeterminate | -9.24E+00 | Indeterminate |
| 33 | p.Glu33Ser | 894   | 826   | 2.34  | 2.51  | -3.59E+00 | Neutral       | -3.59E+00 | Neutral       |
| 33 | p.Glu33Ile | 3960  | 3269  | 10.35 | 9.92  | -1.31E-02 | Neutral       | -1.31E-02 | Neutral       |
| 33 | p.Glu33Met | 4009  | 3279  | 10.48 | 9.95  | -1.07E-02 | Neutral       | -1.07E-02 | Neutral       |
| 33 | p.Glu33His | 2694  | 2397  | 7.04  | 7.28  | -1.79E+01 | Neutral       | -6.81E-01 | Neutral       |
| 33 | p.Glu33Gln | 3450  | 3143  | 9.02  | 9.54  | -9.23E-02 | Neutral       | -4.33E-01 | Neutral       |
| 33 | p.Glu33Pro | 2489  | 1886  | 6.51  | 5.73  | -3.51E-02 | Neutral       | -3.51E-02 | Neutral       |
| 33 | p.Glu33Leu | 2006  | 1914  | 5.25  | 5.81  | -8.22E-01 | Neutral       | -8.22E-01 | Neutral       |
| 33 | p.Glu33Asp | 1895  | 1477  | 4.96  | 4.48  | -1.51E-01 | Neutral       | -1.51E-01 | Neutral       |
| 33 | p.Glu33Glu | 1646  | 1522  | 4.30  | 4.62  | -1.06E+00 | Neutral       | -1.06E+00 | Neutral       |
| 33 | p.Glu33Ala | 425   | 405   | 1.11  | 1.23  | -1.14E+01 | Indeterminate | -1.14E+01 | Indeterminate |
| 33 | p.Glu33Gly | 2167  | 1901  | 5.67  | 5.77  | -3.21E-01 | Neutral       | -3.21E-01 | Neutral       |
| 33 | p.Glu33Val | 1148  | 984   | 3.00  | 2.99  | -1.44E+00 | Neutral       | -1.44E+00 | Neutral       |
| 33 | p.Glu33Tyr | 374   | 322   | 0.98  | 0.98  | -9.22E+00 | Indeterminate | -9.22E+00 | Indeterminate |
| 33 | p.Glu33Cys | 784   | 708   | 2.05  | 2.15  | -3.97E+00 | Neutral       | -3.97E+00 | Neutral       |
| 33 | p.Glu33Trp | 1942  | 1609  | 5.08  | 4.88  | -2.63E-01 | Neutral       | -2.63E-01 | Neutral       |
| 33 | p.Glu33Phe | 771   | 678   | 2.02  | 2.06  | -3.58E+00 | Neutral       | -3.58E+00 | Neutral       |
| 34 | p.Ala34Asn | 1048  | 380   | 2.48  | 2.47  | 974       | 864           | 2.39      | 3.01          |
| 34 | p.Ala34Lys | 1978  | 717   | 4.68  | 4.66  | 1977      | 1399          | 4.84      | 4.88          |
| 34 | p.Ala34Thr | 1206  | 360   | 2.86  | 2.34  | 1040      | 862           | 2.55      | 3.01          |
| 34 | p.Ala34Arg | 4462  | 1497  | 10.56 | 9.73  | 4243      | 2972          | 10.39     | 10.37         |
| 34 | p.Ala34Ser | 1003  | 246   | 2.37  | 1.60  | 903       | 642           | 2.21      | 2.24          |
| 34 | p.Ala34Ile | 1160  | 348   | 2.75  | 2.26  | 1259      | 760           | 3.08      | 2.65          |
| 34 | p.Ala34Met | 2790  | 1090  | 6.61  | 7.08  | 2925      | 1910          | 7.16      | 6.66          |
| 34 | p.Ala34His | 1987  | 510   | 4.70  | 3.31  | 1486      | 902           | 3.64      | 3.15          |
| 34 | p.Ala34Gln | 2756  | 1108  | 6.53  | 7.20  | 2539      | 2187          | 6.22      | 7.63          |
| 34 | p.Ala34Pro | 1736  | 907   | 4.11  | 5.89  | 1555      | 1319          | 3.81      | 4.60          |
| 34 | p.Ala34Leu | 2439  | 838   | 5.77  | 5.64  | 1808      | 1808          | 6.05      | 6.31          |
| 34 | p.Ala34Asp | 1230  | 868   | 5.04  | 5.64  | 2207      | 1477          | 5.41      | 5.15          |
| 34 | p.Ala34Glu | 2272  | 972   | 5.38  | 6.32  | 2212      | 1619          | 5.42      | 5.65          |
| 34 | p.Ala34Ala | 2329  | 837   | 5.51  | 5.44  | 2131      | 1576          | 5.22      | 5.50          |
| 34 | p.Ala34Gly | 1829  | 780   | 4.33  | 5.07  | 1820      | 1092          | 4.46      | 3.81          |
| 34 | p.Ala34Val | 1093  | 525   | 2.59  | 3.41  | 1289      | 878           | 3.16      | 3.06          |
| 34 | p.Ala34Tyr |       |       |       |       |           |               |           |               |

|    |            |             |       |       |       |       |       |       |      |       |           |               |           |               |           |               |
|----|------------|-------------|-------|-------|-------|-------|-------|-------|------|-------|-----------|---------------|-----------|---------------|-----------|---------------|
| 35 | p.Gly35Gln |             | 4241  | 1991  | 7.61  | 4.43  | 14962 | 14359 | 6.63 | 5.97  | -5.28E+00 | Neutral       | -7.21E+00 | Indeterminate | -9.22E+00 | Indeterminate |
| 35 | p.Gly35Leu |             | 2624  | 9100  | 4.71  | 20.24 | 10587 | 31189 | 4.69 | 12.96 | -5.32E+01 | Deleterious   | -5.32E+01 | Deleterious   | -5.32E+01 | Deleterious   |
| 35 | p.Gly35Pro |             | 3145  | 2964  | 5.64  | 6.59  | 12395 | 15692 | 5.49 | 6.52  | -5.32E+01 | Deleterious   | -5.32E+01 | Indeterminate | -5.32E+01 | Deleterious   |
| 35 | p.Gly35Asp |             | 2568  | 1419  | 4.61  | 3.16  | 10551 | 7765  | 4.67 | 3.23  | -1.75E+01 | Indeterminate | -3.89E+00 | Neutral       | -1.72E+01 | Indeterminate |
| 35 | p.Gly35Glu | Neutral     | 2733  | 1146  | 4.90  | 2.55  | 10753 | 9407  | 4.76 | 3.91  | -6.09E+00 | Indeterminate | -7.72E+00 | Indeterminate | -1.04E+01 | Indeterminate |
| 35 | p.Gly35Ala |             | 2285  | 903   | 4.10  | 2.01  | 9298  | 6841  | 4.12 | 2.84  | -6.10E+00 | Indeterminate | -4.52E+00 | Neutral       | -7.55E+00 | Indeterminate |
| 35 | p.Gly35Gly | Synonymous  | 1358  | 329   | 2.44  | 0.73  | 5570  | 2694  | 2.47 | 1.12  | -1.06E+00 | Neutral       | -1.06E+00 | Neutral       | -8.18E-01 | Neutral       |
| 35 | p.Gly35Val | Deleterious | 3854  | 5902  | 6.91  | 13.13 | 15424 | 25699 | 6.83 | 10.68 | -5.32E+01 | Deleterious   | -3.73E+01 | Indeterminate | -5.32E+01 | Deleterious   |
| 35 | p.Gly35Tyr |             | 2312  | 1427  | 4.15  | 3.17  | 10542 | 8067  | 4.67 | 3.35  | -2.63E+01 | Indeterminate | -4.47E+00 | Neutral       | -2.63E+01 | Indeterminate |
| 35 | p.Gly35Cys |             | 3042  | 1561  | 5.46  | 3.47  | 11585 | 9259  | 5.13 | 3.85  | -1.15E+01 | Indeterminate | -4.73E+00 | Neutral       | -1.26E+01 | Indeterminate |
| 35 | p.Gly35Trp | Deleterious | 4083  | 3648  | 7.32  | 8.11  | 15410 | 18194 | 6.83 | 7.56  | -4.10E+01 | Indeterminate | -1.46E+01 | Indeterminate | -5.32E+01 | Deleterious   |
| 35 | p.Gly35Phe |             | 3051  | 1446  | 5.47  | 3.22  | 13371 | 10574 | 5.92 | 4.39  | -8.60E+00 | Indeterminate | -3.57E+00 | Neutral       | -8.93E+00 | Indeterminate |
| 36 | p.Ala36Asn |             | 5581  | 3345  | 5.14  | 6.08  |       |       |      |       | -2.13E+01 | Indeterminate |           |               | -2.13E+01 | Indeterminate |
| 36 | p.Ala36Lys |             | 8028  | 18657 | 7.40  | 33.90 |       |       |      |       | -5.32E+01 | Deleterious   |           |               | -5.32E+01 | Deleterious   |
| 36 | p.Ala36Thr |             | 2783  | 1191  | 2.56  | 2.16  |       |       |      |       | -1.56E+01 | Indeterminate |           |               | -1.56E+01 | Indeterminate |
| 36 | p.Ala36Arg |             | 4397  | 1199  | 4.05  | 2.18  |       |       |      |       | -8.65E-01 | Neutral       |           |               | -8.65E-01 | Neutral       |
| 36 | p.Ala36Ser |             | 4348  | 1450  | 4.01  | 2.64  |       |       |      |       | -3.16E+00 | Neutral       |           |               | -3.16E+00 | Neutral       |
| 36 | p.Ala36Ile |             | 5237  | 1240  | 4.83  | 2.25  |       |       |      |       | -1.36E-01 | Neutral       |           |               | -1.36E-01 | Neutral       |
| 36 | p.Ala36Met |             | 6481  | 232   | 5.97  | 0.42  |       |       |      |       | 0.00E+00  | Neutral       |           |               | 0.00E+00  | Neutral       |
| 36 | p.Ala36His |             | 5535  | 1160  | 5.10  | 2.11  |       |       |      |       | -2.28E-02 | Neutral       |           |               | -2.28E-02 | Neutral       |
| 36 | p.Ala36Gln |             | 5409  | 1222  | 4.98  | 2.22  |       |       |      |       | -6.88E-02 | Neutral       |           |               | -6.88E-02 | Neutral       |
| 36 | p.Ala36Pro |             | 8410  | 9367  | 7.75  | 17.02 |       |       |      |       | -5.32E+01 | Deleterious   |           |               | -5.32E+01 | Deleterious   |
| 36 | p.Ala36Leu |             | 6369  | 2754  | 5.87  | 5.00  |       |       |      |       | -5.94E+00 | Indeterminate |           |               | -5.94E+00 | Indeterminate |
| 36 | p.Ala36Asp |             | 3629  | 1165  | 3.34  | 2.12  |       |       |      |       | -3.54E+00 | Neutral       |           |               | -3.54E+00 | Neutral       |
| 36 | p.Ala36Glu |             | 7209  | 3345  | 6.64  | 6.08  |       |       |      |       | -6.72E+00 | Indeterminate |           |               | -6.72E+00 | Indeterminate |
| 36 | p.Ala36Ala | Synonymous  | 4309  | 1200  | 3.97  | 2.18  |       |       |      |       | -1.06E+00 | Neutral       |           |               | -1.06E+00 | Neutral       |
| 36 | p.Ala36Gly |             | 2425  | 903   | 2.23  | 1.64  |       |       |      |       | -1.15E+01 | Indeterminate |           |               | -1.15E+01 | Indeterminate |
| 36 | p.Ala36Val |             | 5770  | 1324  | 5.32  | 2.41  |       |       |      |       | -6.40E-02 | Neutral       |           |               | -6.40E-02 | Neutral       |
| 36 | p.Ala36Tyr |             | 4470  | 1637  | 4.12  | 2.97  |       |       |      |       | -4.78E+00 | Neutral       |           |               | -4.78E+00 | Neutral       |
| 36 | p.Ala36Cys |             | 4719  | 296   | 4.35  | 0.54  |       |       |      |       | -1.04E-14 | Neutral       |           |               | 0.00E+00  | Neutral       |
| 36 | p.Ala36Trp |             | 7861  | 1433  | 7.24  | 2.60  |       |       |      |       | -2.83E-04 | Neutral       |           |               | -2.83E-04 | Neutral       |
| 36 | p.Ala36Phe |             | 5551  | 1908  | 5.12  | 3.47  |       |       |      |       | -2.39E+00 | Neutral       |           |               | -2.39E+00 | Neutral       |
| 37 | p.Leu37Asn |             | 15659 | 807   | 7.21  | 4.34  |       |       |      |       | -7.48E-02 | Neutral       |           |               | -7.48E-02 | Neutral       |
| 37 | p.Leu37Lys |             | 9469  | 805   | 4.36  | 4.33  |       |       |      |       | -8.20E+00 | Indeterminate |           |               | -8.20E+00 | Indeterminate |
| 37 | p.Leu37Thr |             | 7000  | 646   | 3.22  | 3.48  |       |       |      |       | -1.54E+01 | Indeterminate |           |               | -1.54E+01 | Indeterminate |
| 37 | p.Leu37Arg |             | 10261 | 287   | 4.73  | 1.54  |       |       |      |       | -2.02E-05 | Neutral       |           |               | -2.02E-05 | Neutral       |
| 37 | p.Leu37Ser |             | 7945  | 512   | 3.66  | 2.76  |       |       |      |       | -3.05E+00 | Neutral       |           |               | -3.05E+00 | Neutral       |
| 37 | p.Leu37Ile |             | 13094 | 1494  | 6.03  | 8.04  |       |       |      |       | -1.56E+01 | Indeterminate |           |               | -1.56E+01 | Indeterminate |
| 37 | p.Leu37Met |             | 11651 | 487   | 5.37  | 2.62  |       |       |      |       | -1.66E-02 | Neutral       |           |               | -1.66E-02 | Neutral       |
| 37 | p.Leu37His |             | 11818 | 1084  | 5.44  | 5.83  |       |       |      |       | -8.27E+00 | Indeterminate |           |               | -8.27E+00 | Indeterminate |
| 37 | p.Leu37Gln |             | 17769 | 1937  | 8.18  | 10.42 |       |       |      |       | -9.51E+00 | Indeterminate |           |               | -9.51E+00 | Indeterminate |
| 37 | p.Leu37Pro |             | 9322  | 1163  | 4.29  | 6.26  |       |       |      |       | -2.77E+01 | Indeterminate |           |               | -2.77E+01 | Indeterminate |
| 37 | p.Leu37Leu | Synonymous  | 14149 | 931   | 6.52  | 5.01  |       |       |      |       | -1.06E+00 | Neutral       |           |               | -1.06E+00 | Neutral       |
| 37 | p.Leu37Asp |             | 10884 | 742   | 5.01  | 3.99  |       |       |      |       | -2.34E+00 | Neutral       |           |               | -2.34E+00 | Neutral       |
| 37 | p.Leu37Glu |             | 9551  | 634   | 4.40  | 3.41  |       |       |      |       | -2.57E+00 | Neutral       |           |               | -2.57E+00 | Neutral       |
| 37 | p.Leu37Ala |             | 11018 | 534   | 5.08  | 2.87  |       |       |      |       | -1.43E-01 | Neutral       |           |               | -1.43E-01 | Neutral       |
| 37 | p.Leu37Gly |             | 9306  | 588   | 4.29  | 3.16  |       |       |      |       | -2.03E+00 | Neutral       |           |               | -2.03E+00 | Neutral       |
| 37 | p.Leu37Val |             | 13136 | 1307  | 6.05  | 7.03  |       |       |      |       | -9.83E+00 | Indeterminate |           |               | -9.83E+00 | Indeterminate |
| 37 | p.Leu37Tyr |             | 8482  | 697   | 3.91  | 3.75  |       |       |      |       | -8.28E+00 | Indeterminate |           |               | -8.28E+00 | Indeterminate |
| 37 | p.Leu37Cys |             | 9322  | 518   | 4.29  | 2.79  |       |       |      |       | -8.47E-01 | Neutral       |           |               | -8.47E-01 | Neutral       |
| 37 | p.Leu37Trp |             | 6345  | 2856  | 2.92  | 15.27 |       |       |      |       | -5.32E+01 | Deleterious   |           |               | -5.32E+01 | Deleterious   |
| 37 | p.Leu37Phe |             | 10921 | 555   | 5.03  | 2.99  |       |       |      |       | -2.43E+01 | Neutral       |           |               | -2.43E+01 | Neutral       |
| 38 | p.Pro38Asn |             | 7663  | 2366  | 4.62  | 2.91  |       |       |      |       | -5.32E+01 | Deleterious   |           |               | -5.32E+01 | Deleterious   |
| 38 | p.Pro38Lys |             | 6677  | 2439  | 4.03  | 3.00  |       |       |      |       | -5.32E+01 | Deleterious   |           |               | -5.32E+01 | Deleterious   |
| 38 | p.Pro38Thr |             | 6647  | 881   | 4.01  | 1.08  |       |       |      |       | -6.12E+00 | Indeterminate |           |               | -6.12E+00 | Indeterminate |
| 38 | p.Pro38Arg |             | 6252  | 3126  | 3.77  | 3.84  |       |       |      |       | -5.32E+01 | Deleterious   |           |               | -5.32E+01 | Deleterious   |
| 38 | p.Pro38Ser |             | 6013  | 1033  | 3.63  | 1.27  |       |       |      |       | -1.73E+01 | Indeterminate |           |               | -1.73E+01 | Indeterminate |
| 38 | p.Pro38Ile |             | 6138  | 1077  | 3.70  | 1.32  |       |       |      |       | -1.81E+01 | Indeterminate |           |               | -1.81E+01 | Indeterminate |
| 38 | p.Pro38Met |             | 8518  | 1945  | 5.14  | 2.39  |       |       |      |       | -2.77E+01 | Indeterminate |           |               | -2.77E+01 | Indeterminate |
| 38 | p.Pro38His |             | 5342  | 2012  | 3.22  | 2.47  |       |       |      |       | -5.32E+01 | Deleterious   |           |               | -5.32E+01 | Deleterious   |
| 38 | p.Pro38Gln |             | 17977 | 7277  | 10.84 | 8.94  |       |       |      |       | -5.32E+01 | Deleterious   |           |               | -5.32E+01 | Deleterious   |
| 38 | p.Pro38Pro | Synonymous  | 7226  | 717   | 4.36  | 0.88  |       |       |      |       | -1.06E+00 | Neutral       |           |               | -1.06E+00 | Neutral       |
| 38 | p.Pro38Leu |             | 10269 | 3279  | 6.19  | 4.03  |       |       |      |       | -5.30E+01 | Indeterminate |           |               | -3.32E+01 | Indeterminate |
| 38 | p.Pro38Asp |             | 7287  | 14782 | 4.39  | 18.15 |       |       |      |       | -5.32E+01 | Deleterious   |           |               | -5.32E+01 | Deleterious   |
| 38 | p.Pro38Glu |             | 14248 | 3748  | 8.59  | 4.60  |       |       |      |       | -2.57E+01 | Indeterminate |           |               | -2.57E+01 | Indeterminate |
| 38 | p.Pro38Ala |             | 6236  | 3456  | 3.76  | 4.24  |       |       |      |       | -5.32E+01 | Deleterious   |           |               | -5.32E+01 | Deleterious   |
| 38 | p.Pro38Gly |             | 8191  | 804   | 4.94  | 0.99  |       |       |      |       | -7.14E-01 | Neutral       |           |               | -7.14E-01 | Neutral       |
| 38 | p.Pro38Val |             | 10026 | 1016  | 6.04  | 1.25  |       |       |      |       | -5.34E-01 | Neutral       |           |               | -5.34E-01 | Neutral       |
| 38 | p.Pro38Tyr |             | 4282  | 1445  | 2.58  | 1.77  |       |       |      |       | -5.32E+01 | Deleterious   |           |               | -5.32E+01 | Deleterious   |
| 38 | p.Pro38Cys |             | 8165  | 611   | 4.92  | 0.75  |       |       |      |       | -4.22E-02 | Neutral       |           |               | -4.22E-02 | Neutral       |
| 38 | p.Pro38Trp |             | 7975  | 24617 | 4.81  | 30.23 |       |       |      |       | -5.32E+01 | Deleterious   |           |               | -5.32E+01 | Deleterious   |
| 38 | p.Pro38Phe |             | 10730 | 4800  | 6.47  | 5.89  |       |       |      |       | -5.32E+01 | Deleterious   |           |               | -5.32E+01 | Deleterious   |
| 39 | p.Asn39Asn | Synonymous  | 11025 | 1321  | 4.88  | 1.95  |       |       |      |       | -1.06E+00 | Neutral       |           |               | -1.06E+00 | Neutral       |
| 39 | p.Asn39Thr |             | 12759 | 3256  | 5.65  | 4.81  |       |       |      |       | -2.29E+01 | Indeterminate |           |               | -2.29E+01 | Indeterminate |
| 39 | p.Asn39Tyr |             | 9531  | 725   | 4.22  | 1.07  |       |       |      |       | -1.29E-02 | Neutral       |           |               | -1.29E-02 | Neutral       |
| 39 | p.Asn39Arg |             | 7919  | 1061  | 3.51  | 1.57  |       |       |      |       | -3.95E+00 | Neutral       |           |               | -3.95E+00 | Neutral       |
| 39 | p.Asn39Ser |             | 8858  | 1238  | 3.92  | 1.83  |       |       |      |       | -4.05E+00 | Neutral       |           |               | -4.05E+00 | Neutral       |
| 39 | p.Asn39Ile |             | 10639 | 1845  | 4.71  | 2.73  |       |       |      |       | -7.95E+00 | Indeterminate |           |               | -7.95E+00 | Indeterminate |
| 39 | p.Asn39Met |             | 12667 | 3339  | 5.61  | 4.93  |       |       |      |       | -2.52E+01 | Indeterminate |           |               | -2.52E+01 | Indeterminate |
| 39 | p.Asn39His |             | 11236 | 950   | 4.98  | 1.40  |       |       |      |       | -2.72E-02 | Neutral       |           |               | -2.72E-02 | Neutral       |
| 39 | p.Asn39Gln |             | 8347  | 932   | 3.70  | 1.38  |       |       |      |       | -1.24E+00 | Neutral       |           |               | -1.24E+00 | Neutral       |
| 39 | p.Asn39Lys |             | 9695  | 16800 | 4.30  | 24.82 |       |       |      |       | -5.32E+01 | Deleterious   |           |               | -5.32E+01 | Deleterious   |
| 39 | p.Asn39Leu |             | 13886 | 6932  | 6.15  | 10.24 |       |       |      |       | -5.32E+01 | Deleterious   |           |               | -5.32E+01 | Deleterious   |
| 39 | p.Asn39Asp |             | 15016 | 1873  | 6.65  | 2.77  |       |       |      |       | -6.59E-01 | Neutral       |           |               | -6.59E-01 | Neutral       |
| 39 | p.Asn39Glu |             | 15471 | 2195  | 6.85  | 3.24  |       |       |      |       | -1.56E+00 | Neutral       |           |               | -1.56E+00 | Neutral       |
| 39 | p.Asn39Ala |             | 8785  | 1365  | 3.89  | 2.02  |       |       |      |       | -6.60E+00 | Indeterminate |           |               | -6.60E+00 | Indeterminate |
| 39 | p.Asn39Gly |             | 15618 | 1831  | 6.92  | 2.70  |       |       |      |       | -3.42E-01 | Neutral       |           |               | -3.42E-01 | Neutral       |
| 39 | p.Asn39Val |             | 12208 | 1947  | 5.41  | 2.88  |       |       |      |       | -4.58E+00 | Neutral       |           |               | -4.58E+00 | Neutral       |
| 39 | p.Asn39Tyr |             | 8959  | 952   | 3.97  | 1.41  |       |       |      |       | -7.21E-01 | Neutral       |           |               | -7.21E-01 | Neutral       |
| 39 | p.Asn39Cys |             | 13589 | 7404  | 6.02  | 10.94 |       |       |      |       | -5.32E+01 | Deleterious   |           |               | -5.32E+01 | Deleterious   |
| 39 | p.Asn39Trp |             | 9837  | 1931  | 4.36  | 2.85  |       |       |      |       | -1.36E+01 | Indeterminate |           |               | -1.36E+01 | Indeterminate |
| 39 | p.Asn39Phe |             | 9654  | 9801  | 4.28  | 14.48 |       |       |      |       | -5.32E+01 | Deleterious   |           |               | -5.32E+01 | Deleterious   |
| 40 | p.Ala40Asn |             | 17799 | 1463  | 5.87  | 4.98  |       |       |      |       | -6.02E+00 | Indeterminate |           |               | -6.02E+00 | Indeterminate |
| 40 | p.Ala40Lys |             | 21626 | 1443  | 7.13  | 4.91  |       |       |      |       | -1.40E+00 | Neutral       |           |               | -1.40E+00 | Neutral       |
| 40 | p.Ala40Thr |             | 19138 | 8921  | 6.31  | 30.36 |       |       |      |       |           |               |           |               |           |               |

|    |            |       |       |      |       |      |      |      |       |           |               |           |             |           |               |
|----|------------|-------|-------|------|-------|------|------|------|-------|-----------|---------------|-----------|-------------|-----------|---------------|
| 42 | p.Asn42His | 9633  | 2787  | 4.79 | 4.52  |      |      |      |       | -5.32E+01 | Deleterious   |           |             | -5.32E+01 | Deleterious   |
| 42 | p.Asn42Gln | 10388 | 2910  | 5.16 | 4.72  |      |      |      |       | -5.32E+01 | Deleterious   |           |             | -5.32E+01 | Deleterious   |
| 42 | p.Asn42Pro | 6267  | 2676  | 3.11 | 4.34  |      |      |      |       | -5.32E+01 | Deleterious   |           |             | -5.32E+01 | Deleterious   |
| 42 | p.Asn42Leu | 9292  | 4188  | 4.62 | 6.79  |      |      |      |       | -5.32E+01 | Deleterious   |           |             | -5.32E+01 | Deleterious   |
| 42 | p.Asn42Asp | 9064  | 576   | 4.50 | 0.93  |      |      |      |       | -1.07E+01 | Indeterminate |           |             | -1.07E+01 | Indeterminate |
| 42 | p.Asn42Glu | 12901 | 6353  | 6.41 | 10.31 |      |      |      |       | -5.32E+01 | Deleterious   |           |             | -5.32E+01 | Deleterious   |
| 42 | p.Asn42Ala | 7254  | 328   | 3.61 | 0.53  |      |      |      |       | -3.46E+00 | Neutral       |           |             | -3.46E+00 | Neutral       |
| 42 | p.Asn42Val | 12142 | 451   | 6.03 | 0.73  |      |      |      |       | -2.42E+01 | Neutral       |           |             | -2.42E+01 | Neutral       |
| 42 | p.Asn42Ile | 13261 | 5223  | 6.59 | 8.47  |      |      |      |       | -5.32E+01 | Deleterious   |           |             | -5.32E+01 | Deleterious   |
| 42 | p.Asn42Tyr | 9832  | 4604  | 4.89 | 7.47  |      |      |      |       | -5.32E+01 | Deleterious   |           |             | -5.32E+01 | Deleterious   |
| 42 | p.Asn42Cys | 10625 | 622   | 5.28 | 1.01  |      |      |      |       | -6.36E+00 | Indeterminate |           |             | -6.36E+00 | Indeterminate |
| 42 | p.Asn42Trp | 8933  | 5163  | 4.44 | 8.38  |      |      |      |       | -5.32E+01 | Deleterious   |           |             | -5.32E+01 | Deleterious   |
| 42 | p.Asn42Phe | 10895 | 5419  | 5.41 | 8.79  |      |      |      |       | -5.32E+01 | Deleterious   |           |             | -5.32E+01 | Deleterious   |
| 43 | p.Ser43Asn | 8865  | 6639  | 3.69 | 3.91  |      |      |      |       | -3.02E+00 | Neutral       |           |             | -3.02E+00 | Neutral       |
| 43 | p.Ser43Ile | 16747 | 11835 | 6.97 | 6.97  |      |      |      |       | -4.78E+01 | Neutral       |           |             | -4.78E+01 | Neutral       |
| 43 | p.Ser43Thr | 14488 | 9553  | 6.03 | 5.62  |      |      |      |       | -3.96E+01 | Neutral       |           |             | -3.96E+01 | Neutral       |
| 43 | p.Ser43Arg | 16871 | 11411 | 7.02 | 6.72  |      |      |      |       | -3.13E+01 | Neutral       |           |             | -3.13E+01 | Neutral       |
| 43 | p.Ser43Ser | 11014 | 7488  | 4.58 | 4.41  |      |      |      |       | -1.06E+00 | Neutral       |           |             | -1.06E+00 | Neutral       |
| 43 | p.Ser43Ile | 7943  | 6763  | 3.30 | 3.98  |      |      |      |       | -6.55E+00 | Indeterminate |           |             | -6.55E+00 | Indeterminate |
| 43 | p.Ser43Met | 15797 | 11730 | 6.57 | 6.90  |      |      |      |       | -8.40E+01 | Neutral       |           |             | -8.40E+01 | Neutral       |
| 43 | p.Ser43His | 16521 | 11177 | 6.87 | 6.58  |      |      |      |       | -3.35E+01 | Neutral       |           |             | -3.35E+01 | Neutral       |
| 43 | p.Ser43Gln | 17314 | 11767 | 7.20 | 6.93  |      |      |      |       | -3.01E+01 | Neutral       |           |             | -3.01E+01 | Neutral       |
| 43 | p.Ser43Pro | 12527 | 8469  | 5.21 | 4.98  |      |      |      |       | -7.37E+01 | Neutral       |           |             | -7.37E+01 | Neutral       |
| 43 | p.Ser43Leu | 10449 | 7515  | 4.35 | 4.42  |      |      |      |       | -1.74E+00 | Neutral       |           |             | -1.74E+00 | Neutral       |
| 43 | p.Ser43Asp | 11537 | 8545  | 4.80 | 5.03  |      |      |      |       | -1.70E+00 | Neutral       |           |             | -1.70E+00 | Neutral       |
| 43 | p.Ser43Glu | 14597 | 10128 | 6.07 | 5.96  |      |      |      |       | -6.03E+01 | Neutral       |           |             | -6.03E+01 | Neutral       |
| 43 | p.Ser43Ala | 11830 | 7793  | 4.92 | 4.59  |      |      |      |       | -6.98E+01 | Neutral       |           |             | -6.98E+01 | Neutral       |
| 43 | p.Ser43Gly | 4691  | 3009  | 1.95 | 1.77  |      |      |      |       | -4.02E+00 | Neutral       |           |             | -4.02E+00 | Neutral       |
| 43 | p.Ser43Val | 11779 | 8766  | 4.90 | 5.16  |      |      |      |       | -1.68E+00 | Neutral       |           |             | -1.68E+00 | Neutral       |
| 43 | p.Ser43Tyr | 9565  | 6955  | 3.98 | 4.09  |      |      |      |       | -2.22E+00 | Neutral       |           |             | -2.22E+00 | Neutral       |
| 43 | p.Ser43Cys | 5091  | 3662  | 2.12 | 2.16  |      |      |      |       | -6.00E+00 | Indeterminate |           |             | -6.00E+00 | Indeterminate |
| 43 | p.Ser43Trp | 10965 | 8262  | 4.56 | 4.86  |      |      |      |       | -2.10E+00 | Neutral       |           |             | -2.10E+00 | Neutral       |
| 43 | p.Ser43Phe | 11776 | 8442  | 4.90 | 4.97  |      |      |      |       | -1.32E+00 | Neutral       |           |             | -1.32E+00 | Neutral       |
| 44 | p.Tyr44Asn | 7443  | 4844  | 6.01 | 6.02  |      |      |      |       | -3.69E+00 | Neutral       |           |             | -3.69E+00 | Neutral       |
| 44 | p.Tyr44Lys | 4300  | 2790  | 3.47 | 3.47  |      |      |      |       | -8.10E+00 | Indeterminate |           |             | -8.10E+00 | Indeterminate |
| 44 | p.Tyr44Thr | 7466  | 3963  | 6.03 | 4.92  |      |      |      |       | -1.08E+00 | Neutral       |           |             | -1.08E+00 | Neutral       |
| 44 | p.Tyr44Arg | 4924  | 2723  | 3.98 | 3.38  |      |      |      |       | -3.23E+00 | Neutral       |           |             | -3.23E+00 | Neutral       |
| 44 | p.Tyr44Ser | 6073  | 3554  | 4.90 | 4.42  |      |      |      |       | -3.02E+00 | Neutral       |           |             | -3.02E+00 | Neutral       |
| 44 | p.Tyr44Ile | 5380  | 3030  | 4.34 | 3.76  |      |      |      |       | -3.05E+00 | Neutral       |           |             | -3.05E+00 | Neutral       |
| 44 | p.Tyr44Met | 5878  | 3444  | 4.75 | 4.28  |      |      |      |       | -3.22E+00 | Neutral       |           |             | -3.22E+00 | Neutral       |
| 44 | p.Tyr44His | 8889  | 5272  | 7.18 | 6.55  |      |      |      |       | -1.55E+00 | Neutral       |           |             | -1.55E+00 | Neutral       |
| 44 | p.Tyr44Gln | 2488  | 1711  | 2.01 | 2.13  |      |      |      |       | -1.82E+01 | Indeterminate |           |             | -1.82E+01 | Indeterminate |
| 44 | p.Tyr44Pro | 6918  | 8564  | 5.59 | 10.64 |      |      |      |       | -3.52E+01 | Indeterminate |           |             | -3.52E+01 | Indeterminate |
| 44 | p.Tyr44Leu | 6515  | 3822  | 5.26 | 4.75  |      |      |      |       | -2.69E+00 | Neutral       |           |             | -2.69E+00 | Neutral       |
| 44 | p.Tyr44Asp | 5508  | 3671  | 4.45 | 4.56  |      |      |      |       | -6.48E+00 | Indeterminate |           |             | -6.48E+00 | Indeterminate |
| 44 | p.Tyr44Glu | 4288  | 3217  | 3.46 | 4.00  |      |      |      |       | -1.36E+01 | Indeterminate |           |             | -1.36E+01 | Indeterminate |
| 44 | p.Tyr44Ala | 4861  | 4765  | 3.92 | 5.92  |      |      |      |       | -2.63E+01 | Indeterminate |           |             | -2.63E+01 | Indeterminate |
| 44 | p.Tyr44Gly | 4818  | 3568  | 3.89 | 4.43  |      |      |      |       | -1.14E+00 | Indeterminate |           |             | -1.14E+00 | Indeterminate |
| 44 | p.Tyr44Val | 11028 | 6477  | 8.90 | 8.05  |      |      |      |       | -8.77E+01 | Neutral       |           |             | -8.77E+01 | Neutral       |
| 44 | p.Tyr44Tyr | 7415  | 4201  | 6.31 | 5.22  |      |      |      |       | -1.06E+00 | Neutral       |           |             | -1.06E+00 | Neutral       |
| 44 | p.Tyr44Cys | 5174  | 2688  | 4.18 | 3.34  |      |      |      |       | -2.08E+00 | Neutral       |           |             | -2.08E+00 | Neutral       |
| 44 | p.Tyr44Trp | 7945  | 4712  | 6.41 | 5.85  |      |      |      |       | -1.96E+00 | Neutral       |           |             | -1.96E+00 | Neutral       |
| 44 | p.Tyr44Phe | 6154  | 3465  | 4.97 | 4.31  |      |      |      |       | -2.38E+00 | Neutral       |           |             | -2.38E+00 | Neutral       |
| 45 | p.Gly45Asn | 9066  | 190   | 4.25 | 1.00  | 4002 | 2167 | 4.05 | 3.80  | -3.62E-02 | Neutral       | -3.51E+00 | Neutral     | -1.75E+00 | Neutral       |
| 45 | p.Gly45Lys | 10852 | 426   | 5.08 | 2.25  | 4963 | 2650 | 5.02 | 4.65  | -4.19E+00 | Neutral       | -2.20E+00 | Neutral     | -3.95E+00 | Neutral       |
| 45 | p.Gly45Thr | 8428  | 159   | 3.95 | 1.59  | 3637 | 1917 | 3.68 | 3.36  | -1.12E+02 | Neutral       | -3.59E+00 | Neutral     | -1.80E+00 | Neutral       |
| 45 | p.Gly45Arg | 13226 | 675   | 6.19 | 1.98  | 5999 | 3130 | 6.07 | 5.49  | -2.82E+01 | Neutral       | -1.27E+00 | Neutral     | -5.00E+01 | Neutral       |
| 45 | p.Gly45Ser | 13865 | 787   | 6.49 | 4.15  | 6599 | 3360 | 6.68 | 5.89  | -1.31E+01 | Indeterminate | -8.49E-01 | Neutral     | -1.05E+01 | Indeterminate |
| 45 | p.Gly45Ile | 11823 | 669   | 5.54 | 3.53  | 6125 | 3452 | 6.20 | 6.05  | -1.54E+01 | Indeterminate | -2.00E+00 | Neutral     | -1.37E+01 | Indeterminate |
| 45 | p.Gly45Met | 11011 | 402   | 5.16 | 2.12  | 5143 | 2690 | 5.21 | 4.72  | -2.82E+00 | Neutral       | -1.81E+00 | Neutral     | -2.56E+00 | Neutral       |
| 45 | p.Gly45His | 9932  | 322   | 4.65 | 1.70  | 4752 | 2496 | 4.81 | 4.38  | -1.72E+00 | Neutral       | -2.17E+00 | Neutral     | -2.01E+00 | Neutral       |
| 45 | p.Gly45Gln | 10648 | 224   | 4.99 | 1.18  | 5023 | 2411 | 5.08 | 4.23  | -1.80E-02 | Neutral       | -1.07E+00 | Neutral     | -2.78E+01 | Neutral       |
| 45 | p.Gly45Pro | 8515  | 12301 | 3.99 | 64.90 | 3482 | 7178 | 3.52 | 12.59 | -5.32E+01 | Deleterious   | -5.32E+01 | Deleterious | -5.32E+01 | Deleterious   |
| 45 | p.Gly45Leu | 43995 | 472   | 6.55 | 2.49  | 6319 | 3279 | 6.40 | 5.75  | -1.04E+00 | Neutral       | -1.09E+00 | Neutral     | -8.21E+01 | Neutral       |
| 45 | p.Gly45Asp | 11282 | 237   | 5.28 | 1.25  | 5537 | 2729 | 5.60 | 4.79  | -1.32E-02 | Neutral       | -1.03E+00 | Neutral     | -2.57E+01 | Neutral       |
| 45 | p.Gly45Glu | 10953 | 350   | 5.13 | 1.85  | 5234 | 2644 | 5.30 | 4.64  | -1.26E+00 | Neutral       | -1.39E+00 | Neutral     | -1.15E+00 | Neutral       |
| 45 | p.Gly45Ala | 8210  | 153   | 3.84 | 0.81  | 3412 | 1811 | 3.45 | 3.18  | -1.06E-02 | Neutral       | -4.13E+00 | Neutral     | -2.19E+00 | Neutral       |
| 45 | p.Gly45Gly | 9184  | 270   | 4.30 | 1.42  | 4688 | 2196 | 4.74 | 3.85  | -1.06E+00 | Neutral       | -1.06E+00 | Neutral     | -8.18E+01 | Neutral       |
| 45 | p.Gly45Val | 8564  | 481   | 4.01 | 2.54  | 4028 | 2387 | 4.08 | 4.19  | -2.07E+01 | Indeterminate | -5.33E+00 | Neutral     | -2.18E+01 | Indeterminate |
| 45 | p.Gly45Tyr | 8720  | 186   | 4.08 | 0.98  | 3827 | 2257 | 3.87 | 3.96  | -5.42E-02 | Neutral       | -5.42E+00 | Neutral     | -3.37E+00 | Neutral       |
| 45 | p.Gly45Cys | 11799 | 295   | 5.53 | 1.56  | 5280 | 2701 | 5.34 | 4.74  | -1.11E+01 | Neutral       | -1.48E+00 | Neutral     | -5.20E+01 | Neutral       |
| 45 | p.Gly45Thr | 49020 | 275   | 4.22 | 1.45  | 2974 | 2313 | 4.02 | 4.06  | -1.42E+00 | Neutral       | -5.01E+00 | Neutral     | -3.99E+00 | Neutral       |
| 45 | p.Gly45Phe | 14446 | 381   | 6.77 | 2.01  | 6777 | 3246 | 6.86 | 5.69  | -9.41E-02 | Neutral       | -4.79E-01 | Neutral     | -9.06E-02 | Neutral       |
| 46 | p.Arg46Asn | 12380 | 531   | 5.08 | 1.57  |      |      |      |       | -7.10E+01 | Neutral       |           |             | -7.10E+01 | Neutral       |
| 46 | p.Arg46Lys | 9730  | 361   | 3.99 | 1.07  |      |      |      |       | -4.08E+01 | Neutral       |           |             | -4.08E+01 | Neutral       |
| 46 | p.Arg46Thr | 16955 | 2071  | 6.96 | 6.12  |      |      |      |       | -3.64E+01 | Indeterminate |           |             | -3.31E+01 | Indeterminate |
| 46 | p.Arg46Arg | 13782 | 646   | 5.65 | 1.91  |      |      |      |       | -1.06E+00 | Neutral       |           |             | -1.06E+00 | Neutral       |
| 46 | p.Arg46Ser | 13112 | 523   | 5.38 | 1.54  |      |      |      |       | -3.19E+01 | Neutral       |           |             | -3.19E+01 | Neutral       |
| 46 | p.Arg46Ile | 17693 | 2934  | 7.26 | 8.67  |      |      |      |       | -5.32E+01 | Deleterious   |           |             | -5.32E+01 | Deleterious   |
| 46 | p.Arg46Met | 7746  | 476   | 3.18 | 1.41  |      |      |      |       | -1.07E+01 | Indeterminate |           |             | -1.07E+01 | Indeterminate |
| 46 | p.Arg46His | 8963  | 333   | 3.68 | 0.98  |      |      |      |       | -5.25E+01 | Neutral       |           |             | -5.25E+01 | Neutral       |
| 46 | p.Arg46Gln | 9746  | 704   | 4.00 | 2.08  |      |      |      |       | -1.43E+01 | Indeterminate |           |             | -1.43E+01 | Indeterminate |
| 46 | p.Arg46Pro | 18485 | 15419 | 7.58 | 45.54 |      |      |      |       | -5.32E+01 | Deleterious   |           |             | -5.32E+01 | Deleterious   |
| 46 | p.Arg46Leu | 16241 | 1098  | 6.66 | 3.24  |      |      |      |       | -5.97E+00 | Indeterminate |           |             | -5.97E+00 | Indeterminate |
| 46 | p.Arg46Asp | 8698  | 2412  | 3.57 | 7.12  |      |      |      |       | -5.32E+01 | Deleterious   |           |             | -5.32E+01 | Deleterious   |
| 46 | p.Arg46Glu | 7379  | 1044  | 3.03 | 3.08  |      |      |      |       | -5.32E+01 | Deleterious   |           |             | -5.32E+01 | Deleterious   |
| 46 | p.Arg46Ala | 9496  | 620   | 3.90 | 1.83  |      |      |      |       | -1.04E+01 | Indeterminate |           |             | -1.04E+01 | Indeterminate |
| 46 | p.Arg46Gly | 12625 | 802   | 5.18 | 2.37  |      |      |      |       | -6.54E+00 | Indeterminate |           |             | -6.54E+00 | Indeterminate |
| 46 | p.Arg46Val | 8953  | 791   | 3.67 | 2.34  |      |      |      |       | -2.76E+01 | Indeterminate |           |             | -2.76E+01 | Indeterminate |
| 46 | p.Arg46Tyr | 14312 | 1176  | 5.87 | 3.47  |      |      |      |       | -1.43E+01 | Indeterminate |           |             | -1.43E+01 | Indeterminate |
| 46 | p.Arg46Cys | 14267 | 907   | 5.85 | 2.68  |      |      |      |       | -5.51E+00 | Neutral       |           |             | -5.51E+00 | Neutral       |
| 46 | p.Arg46Trp | 11216 | 426   | 4.60 | 1.26  |      |      |      |       | -3.27E+01 | Neutral       |           |             | -3.27E+01 | Neutral       |
| 46 | p.Arg46Phe | 11963 | 581   | 4.91 | 1.72  |      |      |      |       | -1.84E+00 | Neutral       |           |             | -1.84E+00 | Neutral       |
| 47 | p.Arg47Asn | 4828  | 1429  | 3.10 | 2.33  |      |      |      |       | -2.20E+00 | Neutral       |           |             | -2.20E+00 | Neutral       |
| 47 | p.Arg47Lys | 6158  | 1982  | 3.96 | 3.24  |      |      |      |       | -2.24E+00 | Neutral       |           |             | -2.24E+00 | Neutral       |
| 47 | p.Arg47Thr | 17976 | 255   | 5.12 | 4.18  |      |      |      |       | -1.27E+00 | Neutral       |           |             | -1.27E+00 | Neutral       |
| 47 | p.Arg47Arg | 8947  | 2906  | 5.75 | 4.75  |      |      |      |       | -1.06E+00 | Neutral       |           |             | -1.06E+00 | Neutral       |
| 47 | p.Arg47Ser | 6416  | 2760  | 4.12 | 4.51  |      |      |      |       |           |               |           |             |           |               |

|    |            |       |       |       |       |           |               |           |               |
|----|------------|-------|-------|-------|-------|-----------|---------------|-----------|---------------|
| 49 | p.Ile49Met | 2492  | 263   | 4.50  | 0.93  | -1.12E+00 | Neutral       | -1.12E+00 | Neutral       |
| 49 | p.Ile49His | 2474  | 1184  | 4.47  | 4.19  | -5.32E+01 | Deleterious   | -5.32E+01 | Deleterious   |
| 49 | p.Ile49Gln | 3367  | 1300  | 6.08  | 4.60  | -5.32E+01 | Deleterious   | -5.32E+01 | Deleterious   |
| 49 | p.Ile49Phe | 3123  | 2176  | 5.64  | 7.69  | -5.32E+01 | Deleterious   | -5.32E+01 | Deleterious   |
| 49 | p.Ile49Leu | 2625  | 246   | 4.74  | 0.87  | -3.69E-01 | Neutral       | -3.69E-01 | Neutral       |
| 49 | p.Ile49Asp | 3604  | 3212  | 6.51  | 11.36 | -5.32E+01 | Deleterious   | -5.32E+01 | Deleterious   |
| 49 | p.Ile49Glu | 3855  | 3143  | 6.96  | 11.11 | -5.32E+01 | Deleterious   | -5.32E+01 | Deleterious   |
| 49 | p.Ile49Ala | 2079  | 459   | 3.76  | 1.62  | -2.97E+01 | Indeterminate | -2.96E+01 | Indeterminate |
| 49 | p.Ile49Gly | 3080  | 2656  | 5.56  | 9.39  | -5.32E+01 | Deleterious   | -5.32E+01 | Deleterious   |
| 49 | p.Ile49Val | 2891  | 306   | 5.22  | 1.08  | -7.90E-01 | Neutral       | -7.90E-01 | Neutral       |
| 49 | p.Ile49Tyr | 1968  | 1294  | 3.56  | 4.58  | -5.32E+01 | Deleterious   | -5.32E+01 | Deleterious   |
| 49 | p.Ile49Cys | 1784  | 321   | 2.22  | 1.14  | -1.96E+01 | Indeterminate | -1.96E+01 | Indeterminate |
| 49 | p.Ile49Trp | 3459  | 2624  | 6.25  | 9.28  | -5.32E+01 | Deleterious   | -5.32E+01 | Deleterious   |
| 49 | p.Ile49Phe | 2399  | 543   | 4.33  | 1.92  | -2.80E+01 | Indeterminate | -2.80E+01 | Indeterminate |
| 50 | p.Gln50Asn | 6179  | 763   | 3.25  | 0.67  | -1.25E+01 | Indeterminate | -1.25E+01 | Indeterminate |
| 50 | p.Gln50Lys | 7027  | 8327  | 3.70  | 7.36  | -5.32E+01 | Deleterious   | -5.32E+01 | Deleterious   |
| 50 | p.Gln50Thr | 5937  | 695   | 3.12  | 0.61  | -1.09E+01 | Indeterminate | -1.09E+01 | Indeterminate |
| 50 | p.Gln50Arg | 7334  | 11605 | 3.86  | 10.26 | -5.32E+01 | Deleterious   | -5.32E+01 | Deleterious   |
| 50 | p.Gln50Ser | 8421  | 928   | 4.43  | 0.82  | -5.39E+00 | Neutral       | -5.39E+00 | Neutral       |
| 50 | p.Gln50Ile | 8078  | 3493  | 4.25  | 3.09  | -5.32E+01 | Deleterious   | -5.32E+01 | Deleterious   |
| 50 | p.Gln50Met | 9962  | 960   | 5.24  | 0.85  | -2.05E+00 | Neutral       | -2.05E+00 | Neutral       |
| 50 | p.Gln50His | 10223 | 4095  | 5.38  | 3.62  | -5.32E+01 | Deleterious   | -5.32E+01 | Deleterious   |
| 50 | p.Gln50Gln | 12106 | 1126  | 6.37  | 1.00  | -1.06E+00 | Neutral       | -1.06E+00 | Neutral       |
| 50 | p.Gln50Pro | 9549  | 16066 | 5.03  | 14.20 | -5.32E+01 | Deleterious   | -5.32E+01 | Deleterious   |
| 50 | p.Gln50Leu | 11007 | 1915  | 5.79  | 1.69  | -2.00E+01 | Indeterminate | -2.00E+01 | Indeterminate |
| 50 | p.Gln50Asp | 10090 | 6468  | 5.31  | 5.72  | -5.32E+01 | Deleterious   | -5.32E+01 | Deleterious   |
| 50 | p.Gln50Glu | 12681 | 1243  | 6.67  | 1.10  | -1.37E+00 | Neutral       | -1.37E+00 | Neutral       |
| 50 | p.Gln50Ala | 7885  | 1001  | 4.15  | 0.88  | -1.04E+01 | Indeterminate | -1.04E+01 | Indeterminate |
| 50 | p.Gln50Gly | 7736  | 1057  | 4.07  | 0.93  | -1.36E+01 | Indeterminate | -1.36E+01 | Indeterminate |
| 50 | p.Gln50Val | 14010 | 5143  | 7.37  | 4.55  | -5.32E+01 | Deleterious   | -5.32E+01 | Deleterious   |
| 50 | p.Gln50Tyr | 13564 | 21314 | 7.14  | 18.84 | -5.32E+01 | Deleterious   | -5.32E+01 | Deleterious   |
| 50 | p.Gln50Cys | 9439  | 1625  | 4.97  | 1.44  | -2.24E+01 | Indeterminate | -2.24E+01 | Indeterminate |
| 50 | p.Gln50Trp | 10854 | 15054 | 5.71  | 13.30 | -5.32E+01 | Deleterious   | -5.32E+01 | Deleterious   |
| 50 | p.Gln50Phe | 7924  | 10276 | 4.17  | 9.08  | -5.32E+01 | Deleterious   | -5.32E+01 | Deleterious   |
| 51 | p.Val51Asn | 2467  | 455   | 1.70  | 0.40  | -5.32E+01 | Deleterious   | -5.32E+01 | Deleterious   |
| 51 | p.Val51Lys | 3393  | 9087  | 2.34  | 8.00  | -5.32E+01 | Deleterious   | -5.32E+01 | Deleterious   |
| 51 | p.Val51Thr | 3961  | 298   | 2.73  | 0.26  | -4.90E+00 | Neutral       | -4.90E+00 | Neutral       |
| 51 | p.Val51Arg | 3536  | 10023 | 2.44  | 8.83  | -5.32E+01 | Deleterious   | -5.32E+01 | Deleterious   |
| 51 | p.Val51Ser | 7469  | 443   | 5.14  | 0.39  | -2.22E-01 | Neutral       | -2.22E-01 | Neutral       |
| 51 | p.Val51Ile | 8945  | 908   | 6.16  | 0.80  | -5.58E+00 | Neutral       | -5.58E+00 | Neutral       |
| 51 | p.Val51Met | 6116  | 1205  | 4.21  | 1.06  | -5.32E+01 | Deleterious   | -5.32E+01 | Deleterious   |
| 51 | p.Val51His | 6561  | 10183 | 4.52  | 8.97  | -5.32E+01 | Deleterious   | -5.32E+01 | Deleterious   |
| 51 | p.Val51Gln | 10283 | 2904  | 2.56  | 2.56  | -5.32E+01 | Deleterious   | -5.32E+01 | Deleterious   |
| 51 | p.Val51Pro | 12358 | 22046 | 8.51  | 19.41 | -5.32E+01 | Deleterious   | -5.32E+01 | Deleterious   |
| 51 | p.Val51Leu | 9977  | 848   | 6.87  | 0.75  | -1.84E+00 | Neutral       | -1.84E+00 | Neutral       |
| 51 | p.Val51Asp | 11158 | 18353 | 7.68  | 16.16 | -5.32E+01 | Deleterious   | -5.32E+01 | Deleterious   |
| 51 | p.Val51Glu | 7184  | 13435 | 4.95  | 11.83 | -5.32E+01 | Deleterious   | -5.32E+01 | Deleterious   |
| 51 | p.Val51Ala | 6834  | 308   | 4.71  | 0.27  | -9.40E-03 | Neutral       | -9.40E-03 | Neutral       |
| 51 | p.Val51Gly | 5966  | 473   | 4.11  | 0.42  | -3.26E+00 | Neutral       | -3.26E+00 | Neutral       |
| 51 | p.Val51Val | 10471 | 833   | 7.21  | 0.73  | -1.06E+00 | Neutral       | -1.06E+00 | Neutral       |
| 51 | p.Val51Tyr | 4583  | 4152  | 3.66  | 3.66  | -5.32E+01 | Deleterious   | -5.32E+01 | Deleterious   |
| 51 | p.Val51Cys | 13104 | 988   | 9.02  | 0.87  | -3.73E-01 | Neutral       | -3.73E-01 | Neutral       |
| 51 | p.Val51Trp | 7433  | 14300 | 5.12  | 12.59 | -5.32E+01 | Deleterious   | -5.32E+01 | Deleterious   |
| 51 | p.Val51Phe | 3400  | 2313  | 2.34  | 2.04  | -5.32E+01 | Deleterious   | -5.32E+01 | Deleterious   |
| 52 | p.Met52Asn | 4478  | 6062  | 2.15  | 2.76  | -1.64E+01 | Indeterminate | -1.64E+01 | Indeterminate |
| 52 | p.Met52Lys | 3389  | 6716  | 1.63  | 3.06  | -5.32E+01 | Deleterious   | -5.32E+01 | Deleterious   |
| 52 | p.Met52Thr | 7325  | 6547  | 3.52  | 2.98  | -1.17E+00 | Neutral       | -1.17E+00 | Neutral       |
| 52 | p.Met52Arg | 3644  | 7476  | 1.75  | 3.41  | -5.32E+01 | Deleterious   | -5.32E+01 | Deleterious   |
| 52 | p.Met52Ser | 12692 | 10076 | 4.59  | 4.59  | -6.65E-02 | Neutral       | -6.65E-02 | Neutral       |
| 52 | p.Met52Ile | 4566  | 5019  | 2.19  | 2.29  | -7.82E+00 | Indeterminate | -7.82E+00 | Indeterminate |
| 52 | p.Met52Met | 4922  | 3803  | 2.36  | 1.73  | -1.06E+00 | Neutral       | -1.06E+00 | Neutral       |
| 52 | p.Met52His | 8903  | 10578 | 4.27  | 4.82  | -4.19E+00 | Neutral       | -4.19E+00 | Neutral       |
| 52 | p.Met52Gln | 8262  | 7816  | 3.97  | 3.56  | -1.31E+00 | Neutral       | -1.31E+00 | Neutral       |
| 52 | p.Met52Pro | 11304 | 19362 | 5.43  | 8.83  | -1.31E+01 | Indeterminate | -1.31E+01 | Indeterminate |
| 52 | p.Met52Leu | 19024 | 15490 | 9.13  | 7.06  | -1.49E-02 | Neutral       | -1.49E-02 | Neutral       |
| 52 | p.Met52Asp | 7647  | 15009 | 3.67  | 6.84  | -2.82E+01 | Indeterminate | -2.82E+01 | Indeterminate |
| 52 | p.Met52Glu | 10223 | 16152 | 4.91  | 7.36  | -1.11E+01 | Indeterminate | -1.11E+01 | Indeterminate |
| 52 | p.Met52Ala | 20519 | 16257 | 9.85  | 7.41  | -6.58E-03 | Neutral       | -6.58E-03 | Neutral       |
| 52 | p.Met52Gly | 28403 | 21442 | 13.64 | 9.77  | -4.04E-04 | Neutral       | -4.04E-04 | Neutral       |
| 52 | p.Met52Val | 16148 | 12224 | 7.75  | 5.57  | -1.12E-02 | Neutral       | -1.12E-02 | Neutral       |
| 52 | p.Met52Tyr | 5210  | 6051  | 2.50  | 2.76  | -8.17E+00 | Indeterminate | -8.17E+00 | Indeterminate |
| 52 | p.Met52Cys | 15883 | 11778 | 7.63  | 5.37  | -8.88E-03 | Neutral       | -8.88E-03 | Neutral       |
| 52 | p.Met52Trp | 10918 | 16716 | 5.24  | 7.62  | -9.17E+00 | Indeterminate | -9.17E+00 | Indeterminate |
| 52 | p.Met52Phe | 4809  | 4797  | 2.31  | 2.19  | -4.81E+00 | Neutral       | -4.81E+00 | Neutral       |
| 53 | p.Met53Asn | 5148  | 1876  | 4.45  | 2.67  | -3.58E+01 | Indeterminate | -3.30E+01 | Indeterminate |
| 53 | p.Met53Lys | 6247  | 1516  | 5.40  | 2.16  | -8.88E+00 | Indeterminate | -8.88E+00 | Indeterminate |
| 53 | p.Met53Thr | 5939  | 2515  | 5.13  | 3.58  | -4.53E+01 | Indeterminate | -3.32E+01 | Indeterminate |
| 53 | p.Met53Arg | 5012  | 915   | 4.33  | 1.30  | -3.54E+00 | Neutral       | -3.54E+00 | Neutral       |
| 53 | p.Met53Ser | 5763  | 1238  | 4.98  | 1.76  | -6.07E+00 | Indeterminate | -6.07E+00 | Indeterminate |
| 53 | p.Met53Ile | 5291  | 4631  | 4.57  | 6.59  | -5.32E+01 | Deleterious   | -5.32E+01 | Deleterious   |
| 53 | p.Met53Met | 3139  | 402   | 2.71  | 0.57  | -1.06E+00 | Neutral       | -1.06E+00 | Neutral       |
| 53 | p.Met53His | 7214  | 3027  | 6.23  | 4.31  | -3.83E+01 | Indeterminate | -3.32E+01 | Indeterminate |
| 53 | p.Met53Gln | 8241  | 1527  | 7.12  | 2.17  | -1.49E+00 | Neutral       | -1.49E+00 | Neutral       |
| 53 | p.Met53Pro | 5318  | 6610  | 4.59  | 9.40  | -5.32E+01 | Deleterious   | -5.32E+01 | Deleterious   |
| 53 | p.Met53Leu | 6554  | 1519  | 5.66  | 2.16  | -6.97E+00 | Indeterminate | -6.97E+00 | Indeterminate |
| 53 | p.Met53Asp | 5058  | 9025  | 4.37  | 12.84 | -5.32E+01 | Deleterious   | -5.32E+01 | Deleterious   |
| 53 | p.Met53Glu | 7104  | 3670  | 6.14  | 5.22  | -5.32E+01 | Deleterious   | -5.32E+01 | Deleterious   |
| 53 | p.Met53Ala | 6055  | 1223  | 5.23  | 1.74  | -4.27E+00 | Neutral       | -4.27E+00 | Neutral       |
| 53 | p.Met53Gly | 5478  | 4287  | 4.73  | 6.10  | -5.32E+01 | Deleterious   | -5.32E+01 | Deleterious   |
| 53 | p.Met53Val | 5837  | 5714  | 5.04  | 8.13  | -5.32E+01 | Deleterious   | -5.32E+01 | Deleterious   |
| 53 | p.Met53Tyr | 5550  | 4771  | 4.80  | 6.79  | -5.32E+01 | Deleterious   | -5.32E+01 | Deleterious   |
| 53 | p.Met53Cys | 4558  | 1062  | 3.94  | 1.51  | -1.12E+01 | Indeterminate | -1.12E+01 | Indeterminate |
| 53 | p.Met53Trp | 7931  | 11517 | 6.85  | 16.38 | -5.32E+01 | Deleterious   | -5.32E+01 | Deleterious   |
| 53 | p.Met53Phe | 4299  | 3259  | 3.71  | 4.64  | -5.32E+01 | Deleterious   | -5.32E+01 | Deleterious   |
| 54 | p.Met54Asn | 4729  | 6229  | 4.82  | 4.68  | -1.00E+00 | Neutral       | -1.00E+00 | Neutral       |
| 54 | p.Met54Lys | 1457  | 2678  | 1.48  | 2.01  | -2.35E+01 | Indeterminate | -2.35E+01 | Indeterminate |
| 54 | p.Met54Thr | 9921  | 9389  | 10.11 | 7.06  | -6.02E-04 | Neutral       | -6.02E-04 | Neutral       |
| 54 | p.Met54Arg | 2692  | 6197  | 2.74  | 4.66  | -2.49E+01 | Indeterminate | -2.49E+01 | Indeterminate |
| 54 | p.Met54Ser | 7785  | 8580  | 7.93  | 6.45  | -2.84E-02 | Neutral       | -2.84E-02 | Neutral       |
| 54 | p.Met54Ile | 4949  | 5748  | 5.04  | 4.32  | -3.06E-01 | Neutral       | -3.06E-01 | Neutral       |
| 54 | p.Met54Met | 1901  | 1865  | 1.94  | 1.40  | -1.06E+00 | Neutral       | -1.06E+00 | Neutral       |
| 54 | p.Met54His | 1990  | 2453  | 2.03  | 1.84  | -3.79E+00 | Neutral       | -3.79E+00 | Neutral       |
| 54 | p.Met54Gln | 3851  | 6289  | 3.92  | 4.73  | -5.09E+00 | Neutral       | -5.09E+00 | Neutral       |
| 54 | p.Met54Pro | 7720  | 20805 | 7.86  | 15.63 | -1.42E+01 | Indeterminate | -1.42E+01 | Indeterminate |
| 54 | p.Met54Leu | 5644  | 6063  | 5.75  | 4.56  | -8.18E-02 | Neutral       | -8.18E-02 | Neutral       |
| 54 | p.Met54Asp | 5244  | 12085 | 5.34  | 9.08  | -1.29E+01 | Indeterminate | -1.29E+01 | Indeterminate |
| 54 | p.Met54Glu | 3404  | 6990  | 3.47  | 5.25  | -1.42E+01 | Indeterminate | -1.42E+01 | Indeterminate |
| 54 | p.Met54Ala | 4236  | 4218  | 4.32  | 3.17  | -1.03E-01 | Neutral       | -1.03E-01 | Neutral       |
| 54 | p.Met54Gly | 6165  | 6242  | 6.28  | 4.69  | -2.56E-02 | Neutral       | -2.56E-02 | Neutral       |
| 54 | p.Met54Val | 5273  | 5438  | 5.37  | 4.09  | -6.54E-02 | Neutral       | -6.54E-02 | Neutral       |
| 54 | p.Met54Tyr | 2374  | 2422  | 2.42  | 1.82  | -8.20E-01 | Neutral       | -8.20E-01 | Neutral       |
| 54 | p.Met54Cys | 7763  | 6885  | 7.91  | 5.17  | -8.22E-04 | Neutral       | -8.22E-04 | Neutral       |
| 54 | p.Met54Trp | 4101  | 4916  | 4.18  | 3.69  | -7.00E-01 | Neutral       | -7.00E-01 | Neutral       |
| 54 | p.Met54Phe | 6961  | 7588  | 7.09  | 5.70  | -4.06E-02 | Neutral       | -4.06E-02 | Neutral       |
| 55 | p.Gly55Asn | 7992  | 1142  | 3.29  | 3.35  | -5.32E+01 | Deleterious   | -5.32E+01 | Deleterious   |
| 55 | p.Gly55Lys | 10951 | 2798  | 4.51  | 4.37  | -5.32E+01 | Deleterious   | -5.32E+01 | Deleterious   |
| 55 | p.Gly55Thr | 17033 | 3602  | 7.01  | 5.63  | -5.32E+01 | Deleterious   | -5.32E+01 | Deleterious   |
| 55 | p.Gly55Arg | 11124 | 2826  | 4.58  | 4.42  | -5.32E+01 | Deleterious   | -5.32E+01 | Deleterious   |
| 55 | p.Gly55Ser | 12413 | 706   | 5.11  | 1.10  | -3.27E+01 | Indeterminate | -3.19E+01 | Indeterminate |
| 55 | p.Gly55Ile | 11813 | 2953  | 4.86  | 4.62  | -5.32E+01 | Deleterious   | -5.32E+01 | Deleterious   |
| 55 | p.Gly55Met | 10258 | 3064  | 4.22  | 4.79  | -5.32E+01 | Deleterious   | -5.32E+01 | Deleterious   |
| 55 | p.Gly55His | 14055 | 4676  | 5.78  | 7.31  | -5.32E+01 | Deleterious   | -5.32E+01 | Deleterious   |
| 55 | p.Gly55Gln | 14040 | 9922  | 5.78  | 6.13  | -5.32E+01 | Deleterious   | -5.32E+01 | Deleterious   |
| 55 | p.Gly55Pro | 24068 | 10469 | 9.90  | 16.36 | -5.32E+01 | Deleterious   | -5.32E+01 | Deleterious   |
| 55 | p.Gly55Leu | 21350 | 7759  | 8.79  | 12.13 | -5.32E+01 | Deleterious   | -5.       |               |

|    |            |                   |       |       |      |       |       |      |      |      |           |               |           |               |           |               |
|----|------------|-------------------|-------|-------|------|-------|-------|------|------|------|-----------|---------------|-----------|---------------|-----------|---------------|
| 55 | p.Ser56Ile | Pathogenic        | 1577  | 4860  | 5.04 | 17.13 |       |      |      |      | -5.32E+01 | Deleterious   |           |               | -5.32E+01 | Deleterious   |
| 56 | p.Ser56Met |                   | 9103  | 181   | 2.91 | 0.64  |       |      |      |      | -1.66E+04 | Neutral       |           |               | -1.66E+04 | Neutral       |
| 56 | p.Ser56His |                   | 16781 | 342   | 5.36 | 1.21  |       |      |      |      | -3.27E+06 | Neutral       |           |               | -3.27E+06 | Neutral       |
| 56 | p.Ser56Gln |                   | 13828 | 378   | 4.42 | 1.33  |       |      |      |      | -4.63E+03 | Neutral       |           |               | -4.63E+03 | Neutral       |
| 56 | p.Ser56Pro |                   | 15799 | 9165  | 5.05 | 32.30 |       |      |      |      | -5.32E+01 | Deleterious   |           |               | -5.32E+01 | Deleterious   |
| 56 | p.Ser56Leu |                   | 18803 | 1683  | 6.01 | 5.93  |       |      |      |      | -1.75E+01 | Indeterminate |           |               | -1.75E+01 | Indeterminate |
| 56 | p.Ser56Asp |                   | 15719 | 594   | 5.02 | 2.09  |       |      |      |      | -2.05E+01 | Neutral       |           |               | -2.05E+01 | Neutral       |
| 56 | p.Ser56Glu |                   | 16419 | 941   | 5.25 | 3.32  |       |      |      |      | -3.79E+00 | Neutral       |           |               | -3.79E+00 | Neutral       |
| 56 | p.Ser56Ala |                   | 17828 | 655   | 5.70 | 2.31  |       |      |      |      | -9.40E+02 | Neutral       |           |               | -9.40E+02 | Neutral       |
| 56 | p.Ser56Gly |                   | 20474 | 1154  | 6.54 | 4.07  |       |      |      |      | -2.34E+00 | Neutral       |           |               | -2.34E+00 | Neutral       |
| 56 | p.Ser56Val |                   | 17532 | 973   | 5.60 | 3.43  |       |      |      |      | -2.86E+00 | Neutral       |           |               | -2.86E+00 | Neutral       |
| 56 | p.Ser56Tyr |                   | 7771  | 187   | 2.48 | 0.66  |       |      |      |      | -1.28E+02 | Neutral       |           |               | -1.28E+02 | Neutral       |
| 56 | p.Ser56Cys |                   | 14573 | 299   | 4.66 | 1.05  |       |      |      |      | -1.13E+05 | Neutral       |           |               | -1.13E+05 | Neutral       |
| 56 | p.Ser56Trp |                   | 17186 | 3817  | 5.49 | 13.45 |       |      |      |      | -5.32E+01 | Deleterious   |           |               | -5.32E+01 | Deleterious   |
| 56 | p.Ser56Phe |                   | 15288 | 528   | 4.88 | 1.86  |       |      |      |      | -8.26E+02 | Neutral       |           |               | -8.26E+02 | Neutral       |
| 57 | p.Ala57Asn |                   | 4228  | 707   | 5.51 | 4.84  | 12028 | 2228 | 5.44 | 4.68 | -8.42E+04 | Neutral       | -1.69E+00 | Neutral       | -5.69E+01 | Neutral       |
| 57 | p.Ala57Lys |                   | 3617  | 548   | 4.71 | 3.75  | 10968 | 2317 | 4.96 | 4.86 | -2.63E+07 | Neutral       | -4.13E+00 | Neutral       | -2.18E+00 | Neutral       |
| 57 | p.Ala57Thr |                   | 2864  | 570   | 3.73 | 3.90  | 8869  | 1879 | 4.01 | 3.95 | -6.42E+04 | Neutral       | -5.78E+00 | Neutral       | -3.45E+00 | Neutral       |
| 57 | p.Ala57Arg |                   | 3189  | 550   | 4.16 | 3.77  | 11295 | 1899 | 5.10 | 3.99 | -1.57E+05 | Neutral       | -1.01E+00 | Neutral       | -2.42E+01 | Neutral       |
| 57 | p.Ala57Ser |                   | 4843  | 991   | 6.31 | 6.79  | 14163 | 3613 | 6.40 | 7.59 | -3.20E+05 | Neutral       | -6.57E+00 | Neutral       | -4.10E+00 | Neutral       |
| 57 | p.Ala57Ile |                   | 2093  | 525   | 2.73 | 3.60  | 10521 | 1993 | 4.75 | 4.18 | -1.10E+01 | Neutral       | -2.51E+00 | Neutral       | -1.13E+00 | Neutral       |
| 57 | p.Ala57Met |                   | 3187  | 502   | 4.15 | 3.44  | 8084  | 1645 | 3.65 | 3.45 | -1.92E+06 | Neutral       | -5.54E+00 | Neutral       | -3.27E+00 | Neutral       |
| 57 | p.Ala57His |                   | 4482  | 956   | 6.31 | 6.55  | 13594 | 1983 | 6.14 | 4.16 | -1.45E+05 | Neutral       | -1.62E+01 | Neutral       | -8.49E+03 | Neutral       |
| 57 | p.Ala57Gln |                   | 4779  | 911   | 4.08 | 3.97  | 8794  | 2642 | 3.97 | 5.55 | -7.21E+06 | Neutral       | -3.42E+00 | Neutral       | -1.67E+00 | Neutral       |
| 57 | p.Ala57Pro |                   | 4088  | 887   | 5.33 | 6.08  | 10929 | 2644 | 4.94 | 5.55 | -3.47E+04 | Neutral       | -7.51E+00 | Indeterminate | -4.88E+00 | Neutral       |
| 57 | p.Ala57Leu |                   | 3855  | 603   | 5.02 | 4.13  | 9126  | 2396 | 4.12 | 5.03 | -3.45E+07 | Neutral       | -1.26E+01 | Indeterminate | -9.30E+00 | Indeterminate |
| 57 | p.Ala57Asp |                   | 4487  | 1216  | 5.85 | 8.33  | 13571 | 2300 | 6.13 | 4.83 | -1.01E+02 | Neutral       | -6.69E+01 | Neutral       | -1.23E+01 | Neutral       |
| 57 | p.Ala57Glu |                   | 3993  | 794   | 5.20 | 5.44  | 13025 | 3886 | 5.89 | 8.16 | -6.86E+05 | Neutral       | -1.30E+01 | Indeterminate | -9.67E+00 | Indeterminate |
| 57 | p.Ala57Ala | Synonymous        | 2787  | 983   | 3.63 | 6.73  | 9862  | 1597 | 4.46 | 3.35 | -1.06E+00 | Neutral       | -1.06E+00 | Neutral       | -8.18E+01 | Neutral       |
| 57 | p.Ala57Gly |                   | 4677  | 999   | 7.40 | 6.84  | 13161 | 2709 | 5.95 | 5.69 | -2.63E+07 | Neutral       | -2.64E+00 | Neutral       | -1.14E+00 | Neutral       |
| 57 | p.Ala57Val | Likely benign     | 5184  | 783   | 5.45 | 5.36  | 14947 | 2673 | 6.75 | 5.61 | -1.29E+05 | Neutral       | -7.94E+01 | Neutral       | -1.61E+01 | Neutral       |
| 57 | p.Ala57Tyr |                   | 5130  | 578   | 4.08 | 3.90  | 8794  | 2642 | 3.97 | 5.55 | -7.93E+06 | Neutral       | -1.99E+01 | Indeterminate | -1.60E+00 | Neutral       |
| 57 | p.Ala57Cys |                   | 4967  | 664   | 6.47 | 4.55  | 11591 | 2870 | 5.24 | 6.03 | -5.42E+10 | Neutral       | -7.62E+00 | Indeterminate | -4.97E+00 | Neutral       |
| 57 | p.Ala57Trp |                   | 3220  | 520   | 4.20 | 3.56  | 8448  | 2110 | 3.82 | 4.43 | -3.21E+06 | Neutral       | -1.16E+01 | Indeterminate | -8.41E+00 | Indeterminate |
| 57 | p.Ala57Phe |                   | 2695  | 310   | 3.51 | 2.12  | 7000  | 1919 | 3.16 | 4.03 | -2.37E+09 | Neutral       | -1.90E+01 | Indeterminate | -1.51E+01 | Indeterminate |
| 58 | p.Arg58Asn |                   | 11388 | 6167  | 5.68 | 5.29  |       |      |      |      | -3.71E+04 | Neutral       |           |               | -3.71E+04 | Neutral       |
| 58 | p.Arg58Lys |                   | 12667 | 6509  | 6.32 | 5.59  |       |      |      |      | -6.17E+05 | Neutral       |           |               | -6.17E+05 | Neutral       |
| 58 | p.Arg58Thr |                   | 4945  | 2887  | 2.47 | 2.48  |       |      |      |      | -9.58E+02 | Neutral       |           |               | -9.58E+02 | Neutral       |
| 58 | p.Arg58Arg | Synonymous        | 4309  | 3109  | 2.15 | 2.67  |       |      |      |      | -1.06E+00 | Neutral       |           |               | -1.06E+00 | Neutral       |
| 58 | p.Arg58Ser |                   | 489   | 2923  | 4.45 | 4.20  |       |      |      |      | -2.10E+04 | Neutral       |           |               | -2.10E+04 | Neutral       |
| 58 | p.Arg58Ile |                   | 14106 | 8230  | 7.04 | 7.06  |       |      |      |      | -3.97E+04 | Neutral       |           |               | -3.97E+04 | Neutral       |
| 58 | p.Arg58Met |                   | 8462  | 4305  | 4.22 | 3.70  |       |      |      |      | -7.43E+04 | Neutral       |           |               | -7.43E+04 | Neutral       |
| 58 | p.Arg58His |                   | 10078 | 4647  | 5.03 | 3.99  |       |      |      |      | -3.07E+05 | Neutral       |           |               | -3.07E+05 | Neutral       |
| 58 | p.Arg58Gln |                   | 8727  | 5863  | 4.35 | 5.03  |       |      |      |      | -5.28E+02 | Neutral       |           |               | -5.28E+02 | Neutral       |
| 58 | p.Arg58Pro |                   | 9411  | 7328  | 4.70 | 6.29  |       |      |      |      | -2.18E+01 | Neutral       |           |               | -2.18E+01 | Neutral       |
| 58 | p.Arg58Leu |                   | 10691 | 6368  | 5.33 | 5.47  |       |      |      |      | -3.14E+03 | Neutral       |           |               | -3.14E+03 | Neutral       |
| 58 | p.Arg58Asp |                   | 10734 | 5563  | 5.36 | 4.78  |       |      |      |      | -2.29E+04 | Neutral       |           |               | -2.29E+04 | Neutral       |
| 58 | p.Arg58Glu |                   | 12402 | 7460  | 6.19 | 6.40  |       |      |      |      | -1.57E+05 | Neutral       |           |               | -1.57E+05 | Neutral       |
| 58 | p.Arg58Ala |                   | 8563  | 5464  | 4.27 | 4.69  |       |      |      |      | -2.88E+02 | Neutral       |           |               | -2.88E+02 | Neutral       |
| 58 | p.Arg58Gly |                   | 9407  | 6284  | 4.69 | 5.39  |       |      |      |      | -3.52E+02 | Neutral       |           |               | -3.52E+02 | Neutral       |
| 58 | p.Arg58Val |                   | 13045 | 8449  | 6.51 | 7.25  |       |      |      |      | -4.23E+03 | Neutral       |           |               | -4.23E+03 | Neutral       |
| 58 | p.Arg58Tyr |                   | 11421 | 5102  | 5.70 | 4.38  |       |      |      |      | -5.90E+06 | Neutral       |           |               | -5.90E+06 | Neutral       |
| 58 | p.Arg58Cys |                   | 10605 | 5418  | 5.29 | 4.65  |       |      |      |      | -1.86E+04 | Neutral       |           |               | -1.86E+04 | Neutral       |
| 58 | p.Arg58Trp |                   | 8533  | 4672  | 4.26 | 4.01  |       |      |      |      | -2.67E+03 | Neutral       |           |               | -2.67E+03 | Neutral       |
| 58 | p.Arg58Phe |                   | 12024 | 7781  | 6.00 | 6.68  |       |      |      |      | -6.51E+03 | Neutral       |           |               | -6.51E+03 | Neutral       |
| 59 | p.Val59Asn |                   | 2415  | 585   | 4.15 | 1.45  |       |      |      |      | -5.32E+01 | Deleterious   |           |               | -5.32E+01 | Deleterious   |
| 59 | p.Val59Lys |                   | 13078 | 3626  | 6.38 | 8.99  |       |      |      |      | -5.32E+01 | Deleterious   |           |               | -5.32E+01 | Deleterious   |
| 59 | p.Val59Thr |                   | 3352  | 218   | 5.77 | 0.54  |       |      |      |      | -2.12E+01 | Neutral       |           |               | -2.12E+01 | Neutral       |
| 59 | p.Val59Arg |                   | 2890  | 4202  | 4.97 | 10.42 |       |      |      |      | -5.32E+01 | Deleterious   |           |               | -5.32E+01 | Deleterious   |
| 59 | p.Val59Ser |                   | 2742  | 260   | 4.72 | 0.64  |       |      |      |      | -4.70E+00 | Neutral       |           |               | -4.70E+00 | Neutral       |
| 59 | p.Val59Ile |                   | 2316  | 130   | 3.98 | 0.32  |       |      |      |      | -1.64E+01 | Neutral       |           |               | -1.64E+01 | Neutral       |
| 59 | p.Val59Met |                   | 2652  | 203   | 4.56 | 0.50  |       |      |      |      | -1.55E+00 | Neutral       |           |               | -1.55E+00 | Neutral       |
| 59 | p.Val59His |                   | 2849  | 3587  | 4.90 | 8.90  |       |      |      |      | -5.32E+01 | Deleterious   |           |               | -5.32E+01 | Deleterious   |
| 59 | p.Val59Gln |                   | 2874  | 494   | 1.96 |       |       |      |      |      | -5.32E+01 | Deleterious   |           |               | -5.32E+01 | Deleterious   |
| 59 | p.Val59Pro |                   | 3188  | 3072  | 5.48 | 7.62  |       |      |      |      | -5.32E+01 | Deleterious   |           |               | -5.32E+01 | Deleterious   |
| 59 | p.Val59Leu |                   | 3295  | 327   | 5.67 | 0.81  |       |      |      |      | -4.37E+00 | Neutral       |           |               | -4.37E+00 | Neutral       |
| 59 | p.Val59Asp |                   | 2993  | 4745  | 5.15 | 11.77 |       |      |      |      | -5.32E+01 | Deleterious   |           |               | -5.32E+01 | Deleterious   |
| 59 | p.Val59Glu |                   | 3323  | 3022  | 5.72 | 7.50  |       |      |      |      | -5.32E+01 | Deleterious   |           |               | -5.32E+01 | Deleterious   |
| 59 | p.Val59Ala |                   | 2057  | 183   | 3.54 | 0.45  |       |      |      |      | -5.43E+00 | Neutral       |           |               | -5.43E+00 | Neutral       |
| 59 | p.Val59Gly | Pathogenic        | 1783  | 295   | 3.07 | 0.73  |       |      |      |      | -4.27E+01 | Indeterminate |           |               | -3.32E+01 | Indeterminate |
| 59 | p.Val59Val | Synonymous        | 3055  | 232   | 5.26 | 0.58  |       |      |      |      | -1.06E+00 | Neutral       |           |               | -1.06E+00 | Neutral       |
| 59 | p.Val59Tyr |                   | 3471  | 947   | 5.97 | 12.27 |       |      |      |      | -5.32E+01 | Deleterious   |           |               | -5.32E+01 | Deleterious   |
| 59 | p.Val59Cys |                   | 2693  | 193   | 4.63 | 0.48  |       |      |      |      | -9.44E+01 | Neutral       |           |               | -9.44E+01 | Neutral       |
| 59 | p.Val59Trp |                   | 3706  | 6000  | 6.38 | 14.88 |       |      |      |      | -5.32E+01 | Deleterious   |           |               | -5.32E+01 | Deleterious   |
| 59 | p.Val59Phe |                   | 2767  | 3698  | 4.76 | 9.17  |       |      |      |      | -5.32E+01 | Deleterious   |           |               | -5.32E+01 | Deleterious   |
| 60 | p.Ala60Asn |                   | 8575  | 4388  | 3.78 | 4.49  |       |      |      |      | -5.32E+01 | Deleterious   |           |               | -5.32E+01 | Deleterious   |
| 60 | p.Ala60Lys |                   | 13108 | 8103  | 5.78 | 8.29  |       |      |      |      | -5.32E+01 | Deleterious   |           |               | -5.32E+01 | Deleterious   |
| 60 | p.Ala60Thr |                   | 14496 | 2990  | 6.39 | 3.06  |       |      |      |      | -1.18E+00 | Neutral       |           |               | -1.18E+00 | Neutral       |
| 60 | p.Ala60Arg | Deleterious       | 11246 | 10734 | 4.96 | 10.98 |       |      |      |      | -5.32E+01 | Deleterious   |           |               | -5.32E+01 | Deleterious   |
| 60 | p.Ala60Ser |                   | 13309 | 4554  | 5.86 | 4.66  |       |      |      |      | -1.44E+01 | Indeterminate |           |               | -1.44E+01 | Indeterminate |
| 60 | p.Ala60Ile |                   | 11680 | 4451  | 5.15 | 4.55  |       |      |      |      | -2.25E+01 | Indeterminate |           |               | -2.25E+01 | Indeterminate |
| 60 | p.Ala60Met |                   | 13714 | 3222  | 6.04 | 3.30  |       |      |      |      | -2.94E+00 | Neutral       |           |               | -2.94E+00 | Neutral       |
| 60 | p.Ala60His |                   | 14244 | 7153  | 6.28 | 7.32  |       |      |      |      | -3.83E+01 | Indeterminate |           |               | -3.32E+01 | Indeterminate |
| 60 | p.Ala60Gln |                   | 13494 | 8204  | 5.95 | 8.40  |       |      |      |      | -5.32E+01 | Deleterious   |           |               | -5.32E+01 | Deleterious   |
| 60 | p.Ala60Pro |                   | 8977  | 2945  | 3.96 | 3.01  |       |      |      |      | -1.89E+01 | Indeterminate |           |               | -1.89E+01 | Indeterminate |
| 60 | p.Ala60Leu |                   | 9673  | 1966  | 4.26 | 2.01  |       |      |      |      | -2.51E+00 | Neutral       |           |               | -2.51E+00 | Neutral       |
| 60 | p.Ala60Asp |                   | 10802 | 5546  | 4.76 | 5.68  |       |      |      |      | -4.95E+01 | Indeterminate |           |               | -3.32E+01 | Indeterminate |
| 60 | p.Ala60Glu |                   | 12346 | 6691  | 5.45 | 6.85  |       |      |      |      | -5.07E+01 | Indeterminate |           |               | -3.32E+01 | Indeterminate |
| 60 | p.Ala60Ala | Likely pathogenic | 12155 | 2329  | 5.36 | 2.38  |       |      |      |      | -1.06E+00 | Neutral       |           |               | -1.06E+00 | Neutral       |
| 60 | p.Ala60Gly | Synonymous        | 10466 | 2098  | 4.61 | 2.15  |       |      |      |      | -1.98E+00 | Neutral       |           |               | -1.98E+00 | Neutral       |
| 60 | p.Ala60Val |                   | 9945  | 2357  | 4.38 | 2.41  |       |      |      |      | -5.18E+00 | Neutral       |           |               | -5.18E+00 | Neutral       |
| 60 | p.Ala60Tyr |                   | 9740  | 5258  | 4.29 | 5.38  |       |      |      |      | -5.32E+01 | Deleterious   |           |               | -5.32E+01 | Deleterious   |
| 60 | p.Ala60Cys |                   | 9566  | 2423  | 4.21 | 2.48  |       |      |      |      | -7.26E+00 | Indeterminate |           |               | -7.26E+00 | Indeterminate |
| 60 | p.Ala60Trp |                   | 8828  | 5434  | 3.89 | 5.56  |       |      |      |      | -5.32E+01 | Deleterious   |           |               | -5.32E+01 | Deleterious   |
| 60 | p.Ala60Phe |                   | 10    |       |      |       |       |      |      |      |           |               |           |               |           |               |

|    |            |       |       |      |       |           |               |           |               |
|----|------------|-------|-------|------|-------|-----------|---------------|-----------|---------------|
| 63 | p.Leu63Ser | 8714  | 4308  | 4.51 | 5.31  | -5.32E+01 | Deleterious   | -5.32E+01 | Deleterious   |
| 63 | p.Leu63Ile | 10567 | 462   | 5.47 | 0.57  | -5.21E+00 | Neutral       | -5.21E+00 | Neutral       |
| 63 | p.Leu63Met | 8538  | 226   | 4.42 | 0.28  | -3.02E-01 | Neutral       | -3.02E-01 | Neutral       |
| 63 | p.Leu63His | 11608 | 6109  | 6.01 | 7.53  | -5.32E-01 | Deleterious   | -5.32E-01 | Deleterious   |
| 63 | p.Leu63Gln | 7276  | 4368  | 3.77 | 5.39  | -5.32E+01 | Deleterious   | -5.32E+01 | Deleterious   |
| 63 | p.Leu63Pro | 10214 | 6547  | 5.29 | 8.07  | -5.32E+01 | Deleterious   | -5.32E+01 | Deleterious   |
| 63 | p.Leu63Leu | 8789  | 273   | 4.55 | 0.34  | -1.06E+00 | Neutral       | -1.06E+00 | Neutral       |
| 63 | p.Leu63Asp | 6798  | 6741  | 3.52 | 8.31  | -5.32E+01 | Deleterious   | -5.32E+01 | Deleterious   |
| 63 | p.Leu63Glu | 13660 | 6285  | 7.07 | 7.75  | -5.32E+01 | Deleterious   | -5.32E+01 | Deleterious   |
| 63 | p.Leu63Ala | 9691  | 4744  | 5.02 | 5.85  | -5.32E+01 | Deleterious   | -5.32E+01 | Deleterious   |
| 63 | p.Leu63Gly | 8561  | 5277  | 4.43 | 6.51  | -5.32E+01 | Deleterious   | -5.32E+01 | Deleterious   |
| 63 | p.Leu63Val | 6705  | 689   | 3.47 | 0.85  | -5.32E+01 | Deleterious   | -5.32E+01 | Deleterious   |
| 63 | p.Leu63Tyr | 15623 | 7883  | 8.09 | 9.72  | -5.32E+01 | Deleterious   | -5.32E+01 | Deleterious   |
| 63 | p.Leu63Cys | 7726  | 791   | 4.00 | 0.98  | -5.32E+01 | Deleterious   | -5.32E+01 | Deleterious   |
| 63 | p.Leu63Trp | 11790 | 6222  | 6.11 | 7.67  | -5.32E+01 | Deleterious   | -5.32E+01 | Deleterious   |
| 63 | p.Leu63Phe | 6454  | 448   | 3.34 | 0.55  | -3.80E+01 | Indeterminate | -3.32E+01 | Indeterminate |
| 64 | p.Leu64Asn | 12833 | 6821  | 4.39 | 5.64  | -1.11E+01 | Indeterminate | -1.11E+01 | Indeterminate |
| 64 | p.Leu64Lys | 16339 | 6603  | 5.59 | 5.46  | -2.27E+00 | Neutral       | -2.27E+00 | Neutral       |
| 64 | p.Leu64Thr | 14425 | 4621  | 4.94 | 3.82  | -6.00E-01 | Neutral       | -6.00E-01 | Neutral       |
| 64 | p.Leu64Arg | 20825 | 9191  | 7.13 | 7.60  | -2.37E+00 | Neutral       | -2.37E+00 | Neutral       |
| 64 | p.Leu64Ser | 13437 | 4243  | 4.60 | 3.51  | -6.47E-01 | Neutral       | -6.47E-01 | Neutral       |
| 64 | p.Leu64Ile | 6398  | 2634  | 2.19 | 2.18  | -1.02E+01 | Indeterminate | -1.02E+01 | Indeterminate |
| 64 | p.Leu64Met | 11781 | 4017  | 4.03 | 3.32  | -1.56E+00 | Neutral       | -1.56E+00 | Neutral       |
| 64 | p.Leu64His | 21371 | 9431  | 7.31 | 7.80  | -2.25E+00 | Neutral       | -2.25E+00 | Neutral       |
| 64 | p.Leu64Gln | 15398 | 7296  | 5.27 | 6.03  | -5.58E+00 | Neutral       | -5.58E+00 | Neutral       |
| 64 | p.Leu64Pro | 1303  | 1822  | 0.45 | 1.51  | -5.32E+01 | Deleterious   | -5.32E+01 | Deleterious   |
| 64 | p.Leu64Leu | 15457 | 5454  | 5.29 | 4.1   | -1.06E+00 | Neutral       | -1.06E+00 | Neutral       |
| 64 | p.Leu64Asp | 14256 | 9066  | 4.88 | 7.50  | -1.76E+01 | Indeterminate | -1.76E+01 | Indeterminate |
| 64 | p.Leu64Glu | 14674 | 7300  | 5.02 | 6.04  | -7.32E+00 | Indeterminate | -7.32E+00 | Indeterminate |
| 64 | p.Leu64Ala | 18044 | 7247  | 6.17 | 5.99  | -1.79E+00 | Neutral       | -1.79E+00 | Neutral       |
| 64 | p.Leu64Gly | 19651 | 9506  | 6.72 | 7.86  | -4.23E+00 | Neutral       | -4.23E+00 | Neutral       |
| 64 | p.Leu64Val | 10172 | 2912  | 3.48 | 2.41  | -6.18E-01 | Neutral       | -6.18E-01 | Neutral       |
| 64 | p.Leu64Tyr | 14135 | 5042  | 4.84 | 4.17  | -1.41E+00 | Neutral       | -1.41E+00 | Neutral       |
| 64 | p.Leu64Cys | 15527 | 5308  | 5.31 | 4.39  | -8.30E-01 | Neutral       | -8.30E-01 | Neutral       |
| 64 | p.Leu64Trp | 20389 | 7820  | 6.98 | 6.47  | -9.98E-01 | Neutral       | -9.98E-01 | Neutral       |
| 64 | p.Leu64Phe | 15813 | 4622  | 5.41 | 3.82  | -1.91E-01 | Neutral       | -1.91E-01 | Neutral       |
| 65 | p.Leu65Asn | 1677  | 543   | 3.60 | 3.38  | -1.20E+01 | Indeterminate | -1.20E+01 | Indeterminate |
| 65 | p.Leu65Lys | 2335  | 440   | 5.01 | 2.74  | -2.88E-01 | Neutral       | -2.88E-01 | Neutral       |
| 65 | p.Leu65Thr | 2434  | 656   | 5.22 | 4.09  | -3.35E+00 | Neutral       | -3.35E+00 | Neutral       |
| 65 | p.Leu65Arg | 2730  | 595   | 5.85 | 3.71  | -6.63E-01 | Neutral       | -6.63E-01 | Neutral       |
| 65 | p.Leu65Ser | 2983  | 833   | 6.40 | 5.19  | -2.83E+00 | Neutral       | -2.83E+00 | Neutral       |
| 65 | p.Leu65Ile | 1967  | 438   | 4.22 | 2.73  | -1.69E+00 | Neutral       | -1.69E+00 | Neutral       |
| 65 | p.Leu65Met | 2487  | 463   | 5.33 | 2.89  | -2.06E-01 | Neutral       | -2.06E-01 | Neutral       |
| 65 | p.Leu65His | 1410  | 419   | 3.02 | 2.61  | -1.09E+01 | Indeterminate | -1.09E+01 | Indeterminate |
| 65 | p.Leu65Gln | 2753  | 794   | 5.90 | 4.95  | -3.84E+00 | Neutral       | -3.84E+00 | Neutral       |
| 65 | p.Leu65Pro | 1740  | 4497  | 3.73 | 28.03 | -5.32E+01 | Deleterious   | -5.32E+01 | Deleterious   |
| 65 | p.Leu65Leu | 2636  | 604   | 5.65 | 3.76  | -1.06E+00 | Neutral       | -1.06E+00 | Neutral       |
| 65 | p.Leu65Asp | 2598  | 572   | 5.57 | 3.57  | -8.17E-01 | Neutral       | -8.17E-01 | Neutral       |
| 65 | p.Leu65Glu | 2759  | 572   | 5.92 | 3.57  | -4.19E-01 | Neutral       | -4.19E-01 | Neutral       |
| 65 | p.Leu65Ala | 2039  | 549   | 4.37 | 3.42  | -4.46E+00 | Neutral       | -4.46E+00 | Neutral       |
| 65 | p.Leu65Gly | 2677  | 911   | 5.74 | 5.68  | -8.22E+00 | Indeterminate | -8.22E+00 | Indeterminate |
| 65 | p.Leu65Val | 2667  | 680   | 5.72 | 4.24  | -2.08E+00 | Neutral       | -2.08E+00 | Neutral       |
| 65 | p.Leu65Tyr | 2428  | 553   | 5.21 | 3.45  | -1.23E+00 | Neutral       | -1.23E+00 | Neutral       |
| 65 | p.Leu65Cys | 2119  | 761   | 4.54 | 4.74  | -1.31E+01 | Indeterminate | -1.31E+01 | Indeterminate |
| 65 | p.Leu65Trp | 2348  | 753   | 5.03 | 4.69  | -7.73E+00 | Indeterminate | -7.73E+00 | Indeterminate |
| 65 | p.Leu65Phe | 1851  | 410   | 3.97 | 2.56  | -1.85E+00 | Neutral       | -1.85E+00 | Neutral       |
| 66 | p.His66Asn | 11379 | 793   | 4.83 | 1.96  | -1.65E-01 | Neutral       | -1.65E-01 | Neutral       |
| 66 | p.His66Lys | 12099 | 869   | 5.14 | 2.15  | -1.83E-01 | Neutral       | -1.83E-01 | Neutral       |
| 66 | p.His66Thr | 9820  | 910   | 4.17 | 2.25  | -2.36E+00 | Neutral       | -2.36E+00 | Neutral       |
| 66 | p.His66Arg | 12631 | 1230  | 3.36 | 3.05  | -1.93E+00 | Neutral       | -1.93E+00 | Neutral       |
| 66 | p.His66Ser | 10876 | 904   | 4.62 | 2.24  | -9.28E-01 | Neutral       | -9.28E-01 | Neutral       |
| 66 | p.His66Ile | 11804 | 1490  | 5.01 | 3.69  | -7.66E+00 | Indeterminate | -7.66E+00 | Indeterminate |
| 66 | p.His66Met | 11778 | 860   | 5.00 | 2.13  | -2.38E-01 | Neutral       | -2.38E-01 | Neutral       |
| 66 | p.His66His | 9315  | 749   | 3.96 | 1.86  | -1.06E+00 | Neutral       | -1.06E+00 | Neutral       |
| 66 | p.His66Gln | 13561 | 1242  | 5.76 | 3.08  | -1.10E+00 | Neutral       | -1.10E+00 | Neutral       |
| 66 | p.His66Pro | 14437 | 20924 | 6.13 | 51.84 | -5.32E+01 | Deleterious   | -5.32E+01 | Deleterious   |
| 66 | p.His66Leu | 13015 | 1236  | 5.53 | 3.06  | -1.55E+00 | Neutral       | -1.55E+00 | Neutral       |
| 66 | p.His66Asp | 6613  | 509   | 2.81 | 1.26  | -1.70E+00 | Neutral       | -1.70E+00 | Neutral       |
| 66 | p.His66Glu | 13336 | 1439  | 5.66 | 3.56  | -3.12E+00 | Neutral       | -3.12E+00 | Neutral       |
| 66 | p.His66Ala | 12769 | 1270  | 5.42 | 3.15  | -2.15E+00 | Neutral       | -2.15E+00 | Neutral       |
| 66 | p.His66Gly | 13669 | 1191  | 5.81 | 2.95  | -7.45E-01 | Neutral       | -7.45E-01 | Neutral       |
| 66 | p.His66Val | 10655 | 1203  | 4.53 | 2.98  | -5.55E+00 | Neutral       | -5.55E+00 | Neutral       |
| 66 | p.His66Tyr | 10205 | 865   | 4.33 | 2.14  | -1.24E+00 | Neutral       | -1.24E+00 | Neutral       |
| 66 | p.His66Cys | 12241 | 683   | 5.20 | 1.69  | -5.86E-03 | Neutral       | -5.86E-03 | Neutral       |
| 66 | p.His66Trp | 14222 | 1111  | 6.04 | 2.75  | -2.50E+01 | Neutral       | -2.50E+01 | Neutral       |
| 66 | p.His66Phe | 11036 | 888   | 4.69 | 2.20  | -6.96E-01 | Neutral       | -6.96E-01 | Neutral       |
| 67 | p.Gly67Asn | 1613  | 199   | 4.19 | 1.41  | -1.34E-01 | Neutral       | -1.34E-01 | Neutral       |
| 67 | p.Gly67Lys | 1931  | 310   | 5.01 | 2.20  | -8.83E-01 | Neutral       | -8.83E-01 | Neutral       |
| 67 | p.Gly67Thr | 1987  | 510   | 5.16 | 3.62  | -9.71E+00 | Indeterminate | -9.71E+00 | Indeterminate |
| 67 | p.Gly67Arg | 2225  | 231   | 5.77 | 1.64  | -2.44E-03 | Neutral       | -2.44E-03 | Neutral       |
| 67 | p.Gly67Ser | 1578  | 182   | 4.09 | 1.29  | -6.56E-02 | Neutral       | -6.56E-02 | Neutral       |
| 67 | p.Gly67Ile | 1553  | 1876  | 4.03 | 13.31 | -5.32E+01 | Deleterious   | -5.32E+01 | Deleterious   |
| 67 | p.Gly67Met | 1703  | 310   | 4.42 | 2.20  | -2.62E-01 | Neutral       | -2.62E-01 | Neutral       |
| 67 | p.Gly67His | 2343  | 275   | 6.08 | 1.95  | -1.36E-02 | Neutral       | -1.36E-02 | Neutral       |
| 67 | p.Gly67Gln | 1984  | 187   | 5.15 | 1.33  | -8.48E-04 | Neutral       | -8.48E-04 | Neutral       |
| 67 | p.Gly67Pro | 2448  | 5867  | 6.35 | 41.61 | -5.32E+01 | Deleterious   | -5.32E+01 | Deleterious   |
| 67 | p.Gly67Leu | 2000  | 298   | 5.19 | 2.11  | -4.35E-01 | Neutral       | -4.35E-01 | Neutral       |
| 67 | p.Gly67Asp | 1535  | 195   | 3.98 | 1.38  | -2.19E-01 | Neutral       | -2.19E-01 | Neutral       |
| 67 | p.Gly67Glu | 1601  | 201   | 4.15 | 1.43  | -1.67E-01 | Neutral       | -1.67E-01 | Neutral       |
| 67 | p.Gly67Ala | 2068  | 206   | 5.37 | 1.46  | -1.81E-03 | Neutral       | -1.81E-03 | Neutral       |
| 67 | p.Gly67Gln | 1598  | 247   | 4.15 | 1.75  | -1.04E+00 | Neutral       | -1.04E+00 | Neutral       |
| 67 | p.Gly67Val | 2037  | 1509  | 5.29 | 10.70 | -5.32E+01 | Deleterious   | -5.32E+01 | Deleterious   |
| 67 | p.Gly67Tyr | 2243  | 315   | 5.82 | 2.23  | -1.67E-01 | Neutral       | -1.67E-01 | Neutral       |
| 67 | p.Gly67Cys | 1798  | 317   | 4.67 | 2.25  | -1.96E+00 | Neutral       | -1.96E+00 | Neutral       |
| 67 | p.Gly67Trp | 1957  | 441   | 5.08 | 3.13  | -5.92E+00 | Indeterminate | -5.92E+00 | Indeterminate |
| 67 | p.Gly67Phe | 2337  | 423   | 6.06 | 3.00  | -1.32E+00 | Neutral       | -1.32E+00 | Neutral       |
| 68 | p.Ala68Asn | 10578 | 6466  | 3.32 | 4.05  | -5.32E+01 | Deleterious   | -5.32E+01 | Deleterious   |
| 68 | p.Ala68Lys | 16843 | 13015 | 5.29 | 8.16  | -5.32E+01 | Deleterious   | -5.32E+01 | Deleterious   |
| 68 | p.Ala68Thr | 20629 | 5342  | 5.48 | 3.35  | -2.88E+00 | Neutral       | -2.88E+00 | Neutral       |
| 68 | p.Ala68Arg | 9508  | 7401  | 2.99 | 4.64  | -5.32E+01 | Deleterious   | -5.32E+01 | Deleterious   |
| 68 | p.Ala68Ser | 15363 | 2849  | 4.83 | 1.79  | -5.90E-01 | Neutral       | -5.90E-01 | Neutral       |
| 68 | p.Ala68Ile | 11369 | 7162  | 3.57 | 4.49  | -5.32E+01 | Deleterious   | -5.32E+01 | Deleterious   |
| 68 | p.Ala68Met | 20851 | 11459 | 6.55 | 7.18  | -3.82E+01 | Indeterminate | -3.32E+01 | Indeterminate |
| 68 | p.Ala68His | 14597 | 6003  | 4.59 | 3.76  | -2.49E+01 | Indeterminate | -2.49E+01 | Indeterminate |
| 68 | p.Ala68Gln | 14112 | 8817  | 4.43 | 5.53  | -5.32E+01 | Deleterious   | -5.32E+01 | Deleterious   |
| 68 | p.Ala68Pro | 19019 | 12912 | 5.98 | 8.09  | -5.32E+01 | Deleterious   | -5.32E+01 | Deleterious   |
| 68 | p.Ala68Leu | 17116 | 12054 | 5.38 | 7.56  | -5.32E+01 | Deleterious   | -5.32E+01 | Deleterious   |
| 68 | p.Ala68Asp | 14679 | 6960  | 4.61 | 4.36  | -3.55E+01 | Indeterminate | -3.29E+01 | Indeterminate |
| 68 | p.Ala68Glu | 19547 | 9872  | 6.14 | 6.19  | -3.28E+01 | Indeterminate | -3.20E+01 | Indeterminate |
| 68 | p.Ala68Ala | 13663 | 2629  | 4.29 | 1.65  | -1.06E+00 | Neutral       | -1.06E+00 | Neutral       |
| 68 | p.Ala68Gly | 15153 | 3134  | 4.76 | 1.96  | -1.38E+00 | Neutral       | -1.38E+00 | Neutral       |
| 68 | p.Ala68Val | 20388 | 6977  | 6.41 | 4.37  | -1.00E+01 | Indeterminate | -1.00E+01 | Indeterminate |
| 68 | p.Ala68Tyr | 10108 | 7330  | 3.18 | 4.60  | -5.32E+01 | Deleterious   | -5.32E+01 | Deleterious   |
| 68 | p.Ala68Cys | 21550 | 4671  | 6.77 | 2.93  | -8.36E-01 | Neutral       | -8.36E-01 | Neutral       |
| 68 | p.Ala68Trp | 16659 | 2867  | 5.23 | 8.07  | -5.32E+01 | Deleterious   | -5.32E+01 | Deleterious   |
| 68 | p.Ala68Phe | 16504 | 11587 | 5.19 | 7.26  | -5.32E+01 | Deleterious   | -5.32E+01 | Deleterious   |
| 69 | p.Glu69Asn | 1335  | 244   | 3.53 | 5.26  | -5.32E+01 | Deleterious   | -5.32E+01 | Deleterious   |
| 69 | p.Glu69Lys | 1741  | 274   | 4.60 | 5.91  | -3.58E+01 | Indeterminate | -3.30E+01 | Indeterminate |
| 69 | p.Glu69Thr | 1856  | 192   | 4.91 | 4.14  | -9.93E+00 | Indeterminate | -9.93E+00 | Indeterminate |
| 69 | p.Glu69Arg | 1897  | 137   | 5.02 | 2.95  | -1.75E+00 | Neutral       | -1.75E+00 | Neutral       |
| 69 | p.Glu69Ser | 2201  | 266   | 5.82 | 5.73  | -1.39E+01 | Indeterminate | -1.39E+01 | Indeterminate |
| 69 | p.Glu69Ile | 2528  | 228   | 6.80 | 4.91  | -3.57E+00 | Neutral       | -3.57E+00 | Neutral       |
| 69 | p.Glu69Met | 2022  | 315   | 5.35 | 6.79  | -3.09E+01 | Indeterminate | -3.07E+01 | Indeterminate |
| 69 | p.Glu69His | 1853  | 178   | 4.90 | 3.84  | -7.51E+00 | Indeterminate | -7.51E+00 | Indeterminate |
| 69 | p.Glu69Gln | 1715  | 155   | 4.53 | 3.34  | -6.51E+00 | Indeterminate | -6.51E+00 | Indeterminate |
| 69 | p.Glu69Pro | 1958  | 639   | 5.18 | 13.77 | -5.32E+01 | Deleterious   | -5.32E+01 | Deleterious   |
|    |            |       |       |      |       |           |               |           |               |

|    |            |                   |       |       |       |       |       |           |               |           |               |               |           |               |         |
|----|------------|-------------------|-------|-------|-------|-------|-------|-----------|---------------|-----------|---------------|---------------|-----------|---------------|---------|
| 69 | p.Pro70Arg |                   | 1221  | 962   | 8.95  | 5.82  |       | -4.65E-01 | Neutral       |           | -4.65E-01     | Neutral       |           |               |         |
| 70 | p.Pro70Ser |                   | 611   | 1001  | 4.46  | 6.06  |       | -3.42E-01 | Indeterminate |           | -3.26E-01     | Indeterminate |           |               |         |
| 70 | p.Pro70Ile |                   | 868   | 595   | 6.34  | 3.60  |       | -3.83E-01 | Neutral       |           | -3.83E-01     | Neutral       |           |               |         |
| 70 | p.Pro70Met |                   | 1191  | 437   | 8.70  | 2.65  |       | -1.73E-06 | Neutral       |           | -1.73E-06     | Neutral       |           |               |         |
| 70 | p.Pro70His |                   | 344   | 116   | 2.51  | 0.70  |       | -1.74E-03 | Neutral       |           | -1.74E-03     | Neutral       |           |               |         |
| 70 | p.Pro70Gln |                   | 453   | 139   | 3.31  | 0.84  |       | -4.43E-05 | Neutral       |           | -4.43E-05     | Neutral       |           |               |         |
| 70 | p.Pro70Pro | Synonymous        | 683   | 490   | 4.99  | 2.97  |       | -1.06E+00 | Neutral       |           | -1.06E+00     | Neutral       |           |               |         |
| 70 | p.Pro70Val |                   | 725   | 642   | 5.30  | 3.89  |       | -3.39E-01 | Neutral       |           | -3.39E-01     | Neutral       |           |               |         |
| 70 | p.Pro70Asp |                   | 699   | 5207  | 4.89  | 31.52 |       | -5.32E+01 | Deleterious   |           | -5.32E+01     | Deleterious   |           |               |         |
| 70 | p.Pro70Glu |                   | 405   | 1516  | 2.96  | 9.18  |       | -5.32E+01 | Deleterious   |           | -5.32E+01     | Deleterious   |           |               |         |
| 70 | p.Pro70Ala |                   | 506   | 362   | 3.70  | 2.19  |       | -2.01E+00 | Neutral       |           | -2.01E+00     | Neutral       |           |               |         |
| 70 | p.Pro70Gly |                   | 500   | 371   | 3.65  | 2.25  |       | -2.54E+00 | Neutral       |           | -2.54E+00     | Neutral       |           |               |         |
| 70 | p.Pro70Val |                   | 703   | 347   | 5.14  | 2.10  |       | -1.80E-02 | Neutral       |           | -1.80E-02     | Neutral       |           |               |         |
| 70 | p.Pro70Tyr |                   | 458   | 314   | 3.35  | 1.90  |       | -1.90E+00 | Neutral       |           | -1.90E+00     | Neutral       |           |               |         |
| 70 | p.Pro70Cys |                   | 1010  | 291   | 7.38  | 1.76  |       | -1.48E-08 | Neutral       |           | -1.46E-08     | Neutral       |           |               |         |
| 70 | p.Pro70Leu |                   | 557   | 1275  | 4.07  | 7.72  |       | -5.32E+01 | Deleterious   |           | -5.32E+01     | Deleterious   |           |               |         |
| 70 | p.Pro70Phe |                   | 887   | 542   | 6.48  | 3.28  |       | -1.08E-01 | Neutral       |           | -1.08E-01     | Neutral       |           |               |         |
| 71 | p.Asn71Asn | Synonymous        | 7181  | 171   | 4.62  | 0.30  |       | -1.06E+00 | Neutral       |           | -1.06E+00     | Neutral       |           |               |         |
| 71 | p.Asn71Lys | Deleterious       | 8578  | 3658  | 5.51  | 6.33  |       | -5.32E+01 | Deleterious   |           | -5.32E+01     | Deleterious   |           |               |         |
| 71 | p.Asn71Thr |                   | 7155  | 580   | 4.60  | 1.00  |       | -5.32E+01 | Deleterious   |           | -5.32E+01     | Deleterious   |           |               |         |
| 71 | p.Asn71Arg |                   | 7444  | 2468  | 4.78  | 4.27  |       | -5.32E+01 | Deleterious   |           | -5.32E+01     | Deleterious   |           |               |         |
| 71 | p.Asn71Ser | Likely pathogenic | 7700  | 4086  | 3.67  | 7.07  |       | -5.32E+01 | Deleterious   |           | -5.32E+01     | Deleterious   |           |               |         |
| 71 | p.Asn71Ile | Deleterious       | 6534  | 4.50  | 11.31 |       |       | -5.32E+01 | Deleterious   |           | -5.32E+01     | Deleterious   |           |               |         |
| 71 | p.Asn71Met |                   | 4089  | 487   | 2.63  | 0.84  |       | -5.32E+01 | Deleterious   |           | -5.32E+01     | Deleterious   |           |               |         |
| 71 | p.Asn71His |                   | 7484  | 353   | 4.81  | 0.61  |       | -2.06E-01 | Indeterminate |           | -2.06E-01     | Indeterminate |           |               |         |
| 71 | p.Asn71Gln |                   | 6723  | 266   | 4.32  | 0.46  |       | -1.35E-01 | Indeterminate |           | -1.35E-01     | Indeterminate |           |               |         |
| 71 | p.Asn71Pro |                   | 8614  | 17352 | 5.54  | 30.02 |       | -5.32E+01 | Deleterious   |           | -5.32E+01     | Deleterious   |           |               |         |
| 71 | p.Asn71Leu |                   | 7663  | 5928  | 4.93  | 10.26 |       | -5.32E+01 | Deleterious   |           | -5.32E+01     | Deleterious   |           |               |         |
| 71 | p.Asn71Asp |                   | 9069  | 498   | 5.83  | 0.86  |       | -2.63E-01 | Indeterminate |           | -2.63E-01     | Indeterminate |           |               |         |
| 71 | p.Asn71Glu |                   | 10749 | 485   | 6.91  | 0.84  |       | -1.24E-01 | Indeterminate |           | -1.24E-01     | Indeterminate |           |               |         |
| 71 | p.Asn71Ala |                   | 11275 | 608   | 1.05  | 6.05  |       | -2.05E-01 | Indeterminate |           | -2.05E-01     | Indeterminate |           |               |         |
| 71 | p.Asn71Gly |                   | 6444  | 162   | 4.14  | 0.28  |       | -1.93E+00 | Neutral       |           | -1.93E+00     | Neutral       |           |               |         |
| 71 | p.Asn71Val |                   | 7148  | 4897  | 4.59  | 8.47  |       | -5.32E+01 | Deleterious   |           | -5.32E+01     | Deleterious   |           |               |         |
| 71 | p.Asn71Tyr |                   | 8986  | 3770  | 5.78  | 6.52  |       | -5.32E+01 | Deleterious   |           | -5.32E+01     | Deleterious   |           |               |         |
| 71 | p.Asn71Cys |                   | 6712  | 283   | 4.31  | 0.49  |       | -1.65E-01 | Indeterminate |           | -1.65E-01     | Indeterminate |           |               |         |
| 71 | p.Asn71Trp |                   | 8041  | 1238  | 5.17  | 2.14  |       | -5.32E+01 | Deleterious   |           | -5.32E+01     | Deleterious   |           |               |         |
| 71 | p.Asn71Phe |                   | 9509  | 3973  | 6.11  | 6.87  |       | -5.32E+01 | Deleterious   |           | -5.32E+01     | Deleterious   |           |               |         |
| 72 | p.Cys72Asn |                   | 8802  | 378   | 5.55  | 6.25  | 3988  | 1635      | 5.17          | 4.66      | -7.98E-00     | Indeterminate | -3.88E-01 | Neutral       |         |
| 72 | p.Cys72Gln |                   | 6740  | 268   | 4.42  | 3506  | 1606  | 4.54      | 4.57          | -8.34E-01 | Indeterminate | -1.31E+00     | Neutral   |               |         |
| 72 | p.Cys72Thr |                   | 10096 | 417   | 6.36  | 6.90  | 4817  | 1804      | 6.24          | 5.14      | -6.56E+00     | Indeterminate | -7.58E-02 | Neutral       |         |
| 72 | p.Cys72Arg |                   | 5486  | 148   | 3.46  | 2.45  | 4246  | 1315      | 5.50          | 3.74      | -1.75E+00     | Neutral       | -9.63E-03 | Neutral       |         |
| 72 | p.Cys72Ser |                   | 7807  | 304   | 4.92  | 5.03  | 2617  | 1397      | 3.39          | 3.98      | -6.31E+00     | Indeterminate | -5.20E+00 | Neutral       |         |
| 72 | p.Cys72Ile |                   | 7381  | 305   | 4.65  | 5.05  | 3965  | 1960      | 5.14          | 5.58      | -8.61E+00     | Indeterminate | -1.65E+00 | Neutral       |         |
| 72 | p.Cys72Met |                   | 6176  | 187   | 3.89  | 3.09  | 2324  | 1050      | 3.01          | 2.99      | -2.74E+00     | Neutral       | -2.77E+00 | Neutral       |         |
| 72 | p.Cys72His |                   | 4117  | 134   | 2.59  | 2.22  | 1768  | 865       | 2.29          | 2.46      | -7.23E+00     | Indeterminate | -6.27E+00 | Neutral       |         |
| 72 | p.Cys72Gln |                   | 6432  | 304   | 4.05  | 5.03  | 2140  | 1134      | 4.07          | 3.23      | -1.59E+01     | Indeterminate | -2.44E-01 | Neutral       |         |
| 72 | p.Cys72Thr |                   | 9516  | 455   | 6.00  | 5.73  | 4995  | 2515      | 9.07          | 7.16      | -7.16E+00     | Indeterminate | -7.42E-03 | Neutral       |         |
| 72 | p.Cys72Leu |                   | 4547  | 198   | 2.87  | 3.28  | 1856  | 930       | 2.41          | 2.65      | -1.76E+01     | Indeterminate | -6.48E+00 | Neutral       |         |
| 72 | p.Cys72Asp |                   | 9589  | 296   | 6.04  | 4.90  | 4756  | 2676      | 6.16          | 7.62      | -1.26E+00     | Neutral       | -2.50E+00 | Neutral       |         |
| 72 | p.Cys72Glu |                   | 10351 | 375   | 6.52  | 6.20  | 4290  | 2323      | 5.56          | 6.61      | -2.86E+00     | Neutral       | -2.44E+00 | Neutral       |         |
| 72 | p.Cys72Ala |                   | 8098  | 266   | 5.10  | 4.40  | 2928  | 1595      | 3.79          | 4.54      | -2.61E+00     | Neutral       | -4.81E+00 | Neutral       |         |
| 72 | p.Cys72Gly |                   | 4850  | 154   | 3.06  | 2.55  | 3719  | 984       | 4.82          | 2.80      | -5.16E+00     | Neutral       | -1.42E-03 | Neutral       |         |
| 72 | p.Cys72Val |                   | 9374  | 377   | 5.91  | 6.24  | 5039  | 2858      | 6.53          | 8.14      | -5.58E+00     | Neutral       | -2.35E+00 | Neutral       |         |
| 72 | p.Cys72Tyr |                   | 11042 | 374   | 6.94  | 6.15  | 6946  | 3707      | 6.56          | 7.07      | -1.70E+00     | Neutral       | -1.88E-01 | Neutral       |         |
| 72 | p.Cys72Cys | Synonymous        | 9589  | 289   | 6.04  | 4.78  | 3417  | 1506      | 4.43          | 4.29      | -1.06E+00     | Neutral       | -5.96E+00 | Neutral       |         |
| 72 | p.Cys72Trp |                   | 10835 | 582   | 6.83  | 9.63  | 4896  | 2290      | 6.35          | 6.52      | -1.38E+01     | Indeterminate | -6.72E-01 | Neutral       |         |
| 72 | p.Cys72Phe |                   | 7835  | 234   | 4.94  | 3.87  | 3442  | 2376      | 4.46          | 6.76      | -1.58E+00     | Neutral       | -1.01E+01 | Indeterminate |         |
| 73 | p.Ala73Asn |                   | 6226  | 776   | 4.30  | 5.20  | 11983 | 6680      | 4.44          | 4.78      | -7.10E+00     | Indeterminate | -3.83E+00 | Neutral       |         |
| 73 | p.Ala73Lys |                   | 5464  | 431   | 3.77  | 2.89  | 9537  | 5074      | 3.54          | 3.63      | -6.66E-01     | Neutral       | -4.41E+00 | Neutral       |         |
| 73 | p.Ala73Thr |                   | 11273 | 1232  | 7.78  | 8.26  | 21395 | 10364     | 7.93          | 7.42      | -1.26E+00     | Neutral       | -4.10E-01 | Neutral       |         |
| 73 | p.Ala73Arg |                   | 6861  | 819   | 4.74  | 5.49  | 13885 | 6784      | 5.15          | 4.86      | -5.15E+00     | Neutral       | -1.35E+00 | Neutral       |         |
| 73 | p.Ala73Ser |                   | 7157  | 494   | 4.54  | 709   | 13597 | 7093      | 5.04          | 5.08      | -3.67E+00     | Deleterious   | -3.48E+00 | Neutral       |         |
| 73 | p.Ala73Ile |                   | 6816  | 562   | 4.71  | 3.77  | 11736 | 5986      | 4.35          | 4.29      | -5.23E-01     | Neutral       | -2.49E+00 | Neutral       |         |
| 73 | p.Ala73Met |                   | 4904  | 408   | 3.39  | 2.73  | 9903  | 5188      | 3.67          | 3.71      | -1.29E+00     | Neutral       | -3.86E+00 | Neutral       |         |
| 73 | p.Ala73His |                   | 12140 | 1111  | 8.38  | 7.45  | 19805 | 9884      | 7.34          | 7.08      | -2.31E-01     | Neutral       | -6.60E-01 | Neutral       |         |
| 73 | p.Ala73Gln |                   | 4919  | 518   | 3.40  | 3.47  | 8952  | 4454      | 3.32          | 3.19      | -4.81E+00     | Neutral       | -3.52E+00 | Neutral       |         |
| 73 | p.Ala73Pro |                   | 8448  | 860   | 5.83  | 5.76  | 14367 | 8124      | 5.33          | 5.82      | -1.49E+00     | Neutral       | -3.03E+00 | Neutral       |         |
| 73 | p.Ala73Leu |                   | 6766  | 587   | 4.67  | 3.93  | 12546 | 6520      | 4.65          | 4.67      | -8.07E-01     | Neutral       | -2.44E+00 | Neutral       |         |
| 73 | p.Ala73Asp |                   | 9412  | 488   | 3.27  | 3.27  | 7482  | 3511      | 2.77          | 2.51      | -4.57E+00     | Neutral       | -3.54E+00 | Neutral       |         |
| 73 | p.Ala73Glu | Synonymous        | 687   | 687   | 4.60  | 4.60  | 7023  | 4029      | 4.88          | 5.03      | -1.23E+00     | Neutral       | -1.95E+00 | Neutral       |         |
| 73 | p.Ala73Ala |                   | 9781  | 999   | 6.77  | 6.70  | 18899 | 9845      | 7.04          | 7.12      | -1.07E+00     | Neutral       | -1.06E+00 | Neutral       |         |
| 73 | p.Ala73Gly |                   | 7551  | 854   | 5.21  | 5.72  | 15359 | 8099      | 5.70          | 5.80      | -3.41E+00     | Neutral       | -1.78E+00 | Neutral       |         |
| 73 | p.Ala73Val |                   | 7585  | 867   | 5.24  | 5.81  | 16194 | 7473      | 6.01          | 5.35      | -3.57E+00     | Neutral       | -6.00E-01 | Neutral       |         |
| 73 | p.Ala73Tyr |                   | 8714  | 958   | 6.02  | 6.42  | 14375 | 8705      | 5.33          | 6.23      | -2.25E+00     | Neutral       | -4.27E+00 | Neutral       |         |
| 73 | p.Ala73Cys |                   | 7123  | 790   | 4.92  | 5.30  | 13784 | 7017      | 5.11          | 5.02      | -3.40E+00     | Neutral       | -1.79E+00 | Neutral       |         |
| 73 | p.Ala73Trp |                   | 5446  | 663   | 3.76  | 4.44  | 11835 | 6004      | 4.39          | 4.30      | -7.72E+00     | Indeterminate | -2.37E+00 | Neutral       |         |
| 73 | p.Asp74Asn |                   | 3632  | 389   | 3.66  | 3.89  | 10772 | 5759      | 4.02          | 4.12      | -1.51E+00     | Indeterminate | -3.70E+00 | Deleterious   |         |
| 74 | p.Asp74Arg |                   | 1709  | 639   | 4.77  | 1.32  | 1637  | 440       | 4.33          | 4.23      | -1.61E+01     | Indeterminate | -2.63E+01 | Deleterious   |         |
| 74 | p.Asp74Lys |                   | 2080  | 5773  | 5.81  | 11.95 | 2112  | 2212      | 5.59          | 11.17     | -5.32E+01     | Deleterious   | -5.32E+01 | Deleterious   |         |
| 74 | p.Asp74Thr |                   | 1807  | 2120  | 5.05  | 4.39  | 2075  | 1153      | 5.49          | 5.82      | -5.32E+01     | Deleterious   | -5.32E+01 | Deleterious   |         |
| 74 | p.Asp74Glu |                   | 1651  | 4359  | 4.61  | 9.02  | 1825  | 1757      | 4.83          | 8.87      | -5.32E+01     | Deleterious   | -5.32E+01 | Deleterious   |         |
| 74 | p.Asp74Ser |                   | 1832  | 475   | 5.12  | 0.98  | 1970  | 439       | 5.21          | 2.22      | -3.50E+00     | Neutral       | -1.26E+01 | Indeterminate |         |
| 74 | p.Asp74Ile |                   | 1665  | 513   | 4.65  | 1506  | 1904  | 1506      | 5.04          | 7.60      | -5.32E+01     | Deleterious   | -5.32E+01 | Deleterious   |         |
| 74 | p.Asp74Met |                   | 2121  | 2922  | 5.92  | 6.05  | 2291  | 1390      | 6.06          | 7.02      | -5.32E+01     | Deleterious   | -5.32E+01 | Deleterious   |         |
| 74 | p.Asp74His | Neutral           | 1436  | 376   | 4.01  | 0.78  | 1554  | 225       | 4.11          | 1.14      | -5.38E+00     | Neutral       | -2.84E+00 | Neutral       |         |
| 74 | p.Asp74Gln |                   | 1572  | 2339  | 4.39  | 4.84  | 1722  | 962       | 4.56          | 4.86      | -5.32E+01     | Deleterious   | -5.32E+01 | Deleterious   |         |
| 74 | p.Asp74Pro |                   | 1306  | 3867  | 3.65  | 8.00  | 1439  | 1350      | 3.81          | 6.82      | -5.32E+01     | Deleterious   | -5.32E+01 | Deleterious   |         |
| 74 | p.Asp74Leu | Synonymous        | 2179  | 3931  | 6.09  | 8.14  | 2204  | 1598      | 5.83          | 8.07      | -5.32E+01     | Deleterious   | -5.32E+01 | Deleterious   |         |
| 74 | p.Asp74Asp |                   | 2293  | 526   | 6.40  | 1.09  | 2368  | 337       | 6.26          | 1.70      | -1.06E+00     | Neutral       | -1.06E+00 | Neutral       |         |
| 74 | p.Asp74Glu | Deleterious       | 1010  | 219   | 5.33  | 4.45  | 1855  | 108       | 4.91          | 0.55      | -2.35E+04     | Neutral       | -4.72E-06 | Neutral       |         |
| 74 | p.Asp74Ala |                   | 1430  | 374   | 1.93  | 1.45  | 1438  | 505       | 3.80          | 2.55      | -5.32E+01     | Deleterious   | -5.32E+01 | Deleterious   |         |
| 74 | p.Asp74Gly |                   | 1950  | 722   | 4.05  | 0.49  | 1509  | 440       | 3.99          | 2.02      | -3.98E+01     | Indeterminate | -2.72E+01 | Deleterious   |         |
| 74 | p.Asp74Val |                   | 2034  | 4350  | 5.68  | 9.00  | 2153  | 1594      | 5.70          | 8.05      | -5.32E+01     | Deleterious   | -5.32E+01 | Deleterious   |         |
| 74 | p.Asp74Tyr | Deleterious       | 1872  | 2840  | 5.23  | 5.88  | 1987  | 1081      | 5.26          | 5.46      | -5.32E+01     | Deleterious   | -5.32E+01 | Deleterious   |         |
| 74 | p.Asp74Cys |                   | 1766  | 266   | 4.93  | 0.55  | 1743  | 175       | 4.61          | 0.88      | -3.63E-02     | Neutral       | -1.08E-01 | Neutral       |         |
| 74 | p.Asp74Trp |                   | 2243  | 3647  | 6.26  | 7.55  | 2314  | 1334      | 6.12          | 6.73      | -5.32E+01     | Deleterious   | -5.32E+01 | Deleterious   |         |
| 74 | p.Asp74Phe |                   | 1538  | 2881  | 4.30  | 5.96  | 1700  | 1243      | 4.50          | 6.27      | -5.32E+01     | Deleterious   | -5.32E+01 | Deleterious   |         |
| 75 | p.Pro75Asn |                   | 49670 | 524   | 4.87  | 4.78  | 6867  | 11723     | 3674          | 4.98      | 5.59          | -1.84E+00     | Neutral   | -2.32E+00     | Neutral |
| 75 | p.Pro75Lys |                   |       |       |       |       |       |           |               |           |               |               |           |               |         |

|    |            |       |      |       |       |           |               |           |               |
|----|------------|-------|------|-------|-------|-----------|---------------|-----------|---------------|
| 77 | p.Thr77Arg | 7484  | 1416 | 4.22  | 4.79  | -1.23E+01 | Indeterminate | -1.23E+01 | Indeterminate |
| 77 | p.Thr77Ser | 8715  | 1463 | 4.91  | 4.95  | -6.48E+00 | Indeterminate | -6.48E+00 | Indeterminate |
| 77 | p.Thr77Ile | 9404  | 1326 | 5.30  | 4.49  | -2.46E+00 | Neutral       | -2.46E+00 | Neutral       |
| 77 | p.Thr77Met | 5988  | 879  | 3.37  | 2.97  | -6.23E+00 | Indeterminate | -6.23E+00 | Indeterminate |
| 77 | p.Thr77His | 7330  | 1092 | 4.13  | 3.69  | -4.95E+00 | Neutral       | -4.95E+00 | Neutral       |
| 77 | p.Thr77Gln | 8278  | 1295 | 4.66  | 4.38  | -5.14E+00 | Neutral       | -5.14E+00 | Neutral       |
| 77 | p.Thr77Pro | 7110  | 2118 | 4.01  | 7.17  | -4.41E+01 | Indeterminate | -3.32E+01 | Indeterminate |
| 77 | p.Thr77Leu | 11158 | 1918 | 6.29  | 6.49  | -5.03E+00 | Neutral       | -5.03E+00 | Neutral       |
| 77 | p.Thr77Asp | 4915  | 701  | 2.77  | 2.37  | -7.25E+00 | Indeterminate | -7.25E+00 | Indeterminate |
| 77 | p.Thr77Glu | 9748  | 2211 | 5.49  | 7.48  | -1.66E+01 | Indeterminate | -1.66E+01 | Indeterminate |
| 77 | p.Thr77Ala | 9298  | 1602 | 5.24  | 5.42  | -6.61E+00 | Indeterminate | -6.61E+00 | Indeterminate |
| 77 | p.Thr77Gly | 12368 | 1745 | 5.97  | 5.90  | -1.41E+00 | Neutral       | -1.41E+00 | Neutral       |
| 77 | p.Thr77Val | 11478 | 2244 | 6.47  | 7.59  | -8.27E+00 | Indeterminate | -8.27E+00 | Indeterminate |
| 77 | p.Thr77Tyr | 9931  | 1465 | 5.60  | 4.96  | -2.86E+00 | Neutral       | -2.86E+00 | Neutral       |
| 77 | p.Thr77Cys | 13304 | 2046 | 7.50  | 6.92  | -2.08E+00 | Neutral       | -2.08E+00 | Neutral       |
| 77 | p.Thr77Trp | 6374  | 853  | 3.59  | 2.89  | -3.70E+00 | Neutral       | -3.70E+00 | Neutral       |
| 77 | p.Thr77Phe | 5533  | 701  | 3.12  | 2.37  | -3.56E+00 | Neutral       | -3.56E+00 | Neutral       |
| 78 | p.Leu78Asn | 2675  | 1771 | 7.71  | 6.34  | -4.47E-03 | Neutral       | -4.47E-03 | Neutral       |
| 78 | p.Leu78Lys | 1995  | 1493 | 5.75  | 5.34  | -1.01E-01 | Neutral       | -1.01E-01 | Neutral       |
| 78 | p.Leu78Thr | 1668  | 1264 | 4.81  | 4.52  | -2.23E-01 | Neutral       | -2.23E-01 | Neutral       |
| 78 | p.Leu78Arg | 943   | 1294 | 2.72  | 4.63  | -1.69E+01 | Indeterminate | -1.69E+01 | Indeterminate |
| 78 | p.Leu78Ser | 1338  | 660  | 3.86  | 2.36  | -1.46E-03 | Neutral       | -1.46E-03 | Neutral       |
| 78 | p.Leu78Ile | 2099  | 1782 | 6.05  | 6.38  | -3.23E-01 | Neutral       | -3.23E-01 | Neutral       |
| 78 | p.Leu78Met | 1020  | 1289 | 2.94  | 4.61  | -1.20E+01 | Indeterminate | -1.20E+01 | Indeterminate |
| 78 | p.Leu78His | 1588  | 1438 | 4.58  | 5.15  | -1.17E+00 | Neutral       | -1.17E+00 | Neutral       |
| 78 | p.Leu78Gln | 1438  | 1676 | 4.14  | 6.00  | -5.66E+00 | Neutral       | -5.66E+00 | Neutral       |
| 78 | p.Leu78Pro | 1788  | 2655 | 5.15  | 9.50  | -1.10E+01 | Indeterminate | -1.10E+01 | Indeterminate |
| 78 | p.Leu78Leu | 1779  | 1680 | 5.13  | 5.90  | -1.06E+00 | Neutral       | -1.06E+00 | Neutral       |
| 78 | p.Leu78Asp | 5455  | 2299 | 15.72 | 8.23  | -5.61E-10 | Neutral       | -4.16E-10 | Neutral       |
| 78 | p.Leu78Glu | 1427  | 1642 | 4.11  | 5.88  | -5.41E+00 | Neutral       | -5.41E+00 | Neutral       |
| 78 | p.Leu78Ala | 637   | 727  | 1.84  | 2.60  | -1.43E+01 | Indeterminate | -1.43E+01 | Indeterminate |
| 78 | p.Leu78Gly | 1290  | 219  | 3.72  | 0.78  | -1.12E-15 | Neutral       | 0.00E+00  | Neutral       |
| 78 | p.Leu78Val | 2096  | 1560 | 6.04  | 5.58  | -7.80E-02 | Neutral       | -7.80E-02 | Neutral       |
| 78 | p.Leu78Tyr | 1478  | 1553 | 4.26  | 5.56  | -3.31E+00 | Neutral       | -3.31E+00 | Neutral       |
| 78 | p.Leu78Cys | 1343  | 1282 | 3.87  | 4.59  | -2.33E+00 | Neutral       | -2.33E+00 | Neutral       |
| 78 | p.Leu78Trp | 1194  | 791  | 3.44  | 2.83  | -1.75E-01 | Neutral       | -1.75E-01 | Neutral       |
| 78 | p.Leu78Phe | 1456  | 900  | 4.20  | 3.22  | -3.38E-02 | Neutral       | -3.38E-02 | Neutral       |
| 79 | p.Thr79Asn | 6357  | 2367 | 6.19  | 4.94  | -3.23E-01 | Neutral       | -3.23E-01 | Neutral       |
| 79 | p.Thr79Lys | 4790  | 2080 | 4.67  | 4.34  | -2.10E+00 | Neutral       | -2.10E+00 | Neutral       |
| 79 | p.Thr79Thr | 7615  | 3475 | 7.42  | 7.25  | -1.06E+00 | Neutral       | -1.06E+00 | Neutral       |
| 79 | p.Thr79Arg | 3106  | 1753 | 3.03  | 3.66  | -1.26E+01 | Indeterminate | -1.26E+01 | Indeterminate |
| 79 | p.Thr79Ser | 5296  | 2013 | 5.16  | 4.20  | -6.60E-01 | Neutral       | -6.60E-01 | Neutral       |
| 79 | p.Thr79Ile | 5523  | 1971 | 5.38  | 4.11  | -3.36E-01 | Neutral       | -3.36E-01 | Neutral       |
| 79 | p.Thr79Met | 6204  | 2761 | 6.14  | 5.76  | -1.24E+00 | Neutral       | -1.24E+00 | Neutral       |
| 79 | p.Thr79His | 5309  | 2284 | 5.17  | 4.77  | -1.61E+00 | Neutral       | -1.61E+00 | Neutral       |
| 79 | p.Thr79Gln | 4412  | 1628 | 4.30  | 3.40  | -8.42E-01 | Neutral       | -8.42E-01 | Neutral       |
| 79 | p.Thr79Pro | 3460  | 4139 | 3.37  | 8.64  | -5.32E+01 | Deleterious   | -5.32E+01 | Deleterious   |
| 79 | p.Thr79Leu | 4103  | 1982 | 4.00  | 4.14  | -4.80E+00 | Neutral       | -4.80E+00 | Neutral       |
| 79 | p.Thr79Asp | 3999  | 1769 | 3.90  | 3.69  | -3.25E+00 | Neutral       | -3.25E+00 | Neutral       |
| 79 | p.Thr79Glu | 3681  | 1420 | 3.59  | 2.96  | -1.74E+00 | Neutral       | -1.74E+00 | Neutral       |
| 79 | p.Thr79Ala | 5581  | 2518 | 5.44  | 5.25  | -1.95E+00 | Neutral       | -1.95E+00 | Neutral       |
| 79 | p.Thr79Gly | 5318  | 2596 | 5.38  | 5.42  | -2.54E+00 | Neutral       | -2.54E+00 | Neutral       |
| 79 | p.Thr79Val | 8644  | 4107 | 8.42  | 8.57  | -1.05E+00 | Neutral       | -1.05E+00 | Neutral       |
| 79 | p.Thr79Tyr | 3452  | 1556 | 3.36  | 3.25  | -4.54E+00 | Neutral       | -4.54E+00 | Neutral       |
| 79 | p.Thr79Cys | 5814  | 2910 | 5.66  | 6.07  | -3.24E+00 | Neutral       | -3.24E+00 | Neutral       |
| 79 | p.Thr79Trp | 4719  | 2447 | 4.60  | 5.11  | -5.36E+00 | Neutral       | -5.36E+00 | Neutral       |
| 79 | p.Thr79Phe | 4968  | 2150 | 4.84  | 4.49  | -1.91E+00 | Neutral       | -1.91E+00 | Neutral       |
| 80 | p.Arg80Asn | 9628  | 1551 | 4.97  | 5.34  | -1.78E-01 | Indeterminate | -1.78E-01 | Indeterminate |
| 80 | p.Arg80Lys | 11473 | 1355 | 5.92  | 4.67  | -4.55E+00 | Neutral       | -4.55E+00 | Neutral       |
| 80 | p.Arg80Thr | 5402  | 616  | 2.79  | 2.12  | -1.09E+01 | Indeterminate | -1.09E+01 | Indeterminate |
| 80 | p.Arg80Arg | 13295 | 1283 | 6.86  | 4.42  | -1.06E+00 | Neutral       | -1.06E+00 | Neutral       |
| 80 | p.Arg80Ser | 12287 | 1392 | 6.34  | 4.80  | -3.31E+00 | Neutral       | -3.31E+00 | Neutral       |
| 80 | p.Arg80Ile | 7889  | 1862 | 4.07  | 6.41  | -5.32E+01 | Deleterious   | -5.32E+01 | Deleterious   |
| 80 | p.Arg80Met | 8839  | 1240 | 4.56  | 4.27  | -1.26E+01 | Indeterminate | -1.26E+01 | Indeterminate |
| 80 | p.Arg80His | 9521  | 1203 | 4.92  | 4.14  | -7.91E+00 | Indeterminate | -7.91E+00 | Indeterminate |
| 80 | p.Arg80Gln | 7688  | 1142 | 3.97  | 3.93  | -1.75E+01 | Indeterminate | -1.75E+01 | Indeterminate |
| 80 | p.Arg80Pro | 8976  | 4035 | 6.42  | 13.90 | -5.32E+01 | Deleterious   | -5.32E+01 | Deleterious   |
| 80 | p.Arg80Leu | 10680 | 1517 | 5.51  | 5.23  | -1.06E+01 | Indeterminate | -1.06E+01 | Indeterminate |
| 80 | p.Arg80Asp | 10178 | 1582 | 5.26  | 5.45  | -1.51E+01 | Indeterminate | -1.51E+01 | Indeterminate |
| 80 | p.Arg80Glu | 9465  | 1058 | 4.89  | 3.64  | -4.74E+00 | Neutral       | -4.74E+00 | Neutral       |
| 80 | p.Arg80Ala | 11000 | 1400 | 5.68  | 4.82  | -6.72E+00 | Indeterminate | -6.72E+00 | Indeterminate |
| 80 | p.Arg80Gly | 10632 | 1370 | 5.49  | 4.72  | -7.39E+00 | Indeterminate | -7.39E+00 | Indeterminate |
| 80 | p.Arg80Val | 8051  | 1272 | 4.16  | 4.38  | -2.01E+01 | Indeterminate | -2.01E+01 | Indeterminate |
| 80 | p.Arg80Tyr | 11274 | 1590 | 5.82  | 5.48  | -9.69E+00 | Indeterminate | -9.69E+00 | Indeterminate |
| 80 | p.Arg80Cys | 6897  | 589  | 3.56  | 2.03  | -2.00E+00 | Neutral       | -2.00E+00 | Neutral       |
| 80 | p.Arg80Trp | 11399 | 1615 | 5.89  | 5.56  | -9.72E+00 | Indeterminate | -9.72E+00 | Indeterminate |
| 80 | p.Arg80Phe | 9095  | 1358 | 4.70  | 4.68  | -1.50E+01 | Indeterminate | -1.50E+01 | Indeterminate |
| 81 | p.Pro81Asn | 3270  | 2138 | 4.49  | 5.03  | -5.32E+01 | Deleterious   | -5.32E+01 | Deleterious   |
| 81 | p.Pro81Lys | 4056  | 3564 | 5.57  | 8.39  | -5.32E+01 | Deleterious   | -5.32E+01 | Deleterious   |
| 81 | p.Pro81Thr | 3644  | 1370 | 5.01  | 3.23  | -4.95E+01 | Indeterminate | -3.32E+01 | Indeterminate |
| 81 | p.Pro81Arg | 4210  | 2742 | 5.79  | 6.46  | -5.32E+01 | Deleterious   | -5.32E+01 | Deleterious   |
| 81 | p.Pro81Ser | 2453  | 1122 | 3.37  | 2.64  | -5.32E+01 | Deleterious   | -5.32E+01 | Deleterious   |
| 81 | p.Pro81Ile | 2461  | 1198 | 3.38  | 2.82  | -5.32E+01 | Deleterious   | -5.32E+01 | Deleterious   |
| 81 | p.Pro81Met | 4378  | 2646 | 6.02  | 6.23  | -5.32E+01 | Deleterious   | -5.32E+01 | Deleterious   |
| 81 | p.Pro81His | 3889  | 2773 | 5.35  | 6.53  | -5.32E+01 | Deleterious   | -5.32E+01 | Deleterious   |
| 81 | p.Pro81Gln | 4314  | 4646 | 5.93  | 10.94 | -5.32E+01 | Deleterious   | -5.32E+01 | Deleterious   |
| 81 | p.Pro81Pro | 3937  | 545  | 5.41  | 1.28  | -1.06E+00 | Neutral       | -1.06E+00 | Neutral       |
| 81 | p.Pro81Leu | 2688  | 1382 | 3.69  | 3.25  | -5.32E+01 | Deleterious   | -5.32E+01 | Deleterious   |
| 81 | p.Pro81Asp | 3627  | 2528 | 4.99  | 5.95  | -5.32E+01 | Deleterious   | -5.32E+01 | Deleterious   |
| 81 | p.Pro81Glu | 3955  | 3393 | 5.44  | 7.99  | -5.32E+01 | Deleterious   | -5.32E+01 | Deleterious   |
| 81 | p.Pro81Ala | 2546  | 590  | 3.50  | 1.39  | -2.01E+01 | Indeterminate | -2.01E+01 | Indeterminate |
| 81 | p.Pro81Gly | 3018  | 1629 | 4.15  | 3.84  | -5.32E+01 | Deleterious   | -5.32E+01 | Deleterious   |
| 81 | p.Pro81Val | 3803  | 1377 | 5.23  | 3.24  | -4.42E+01 | Indeterminate | -3.32E+01 | Indeterminate |
| 81 | p.Pro81Tyr | 3466  | 2061 | 4.76  | 4.85  | -5.32E+01 | Deleterious   | -5.32E+01 | Deleterious   |
| 81 | p.Pro81Cys | 5033  | 1452 | 6.92  | 3.42  | -1.97E+01 | Indeterminate | -1.97E+01 | Indeterminate |
| 81 | p.Pro81Trp | 4048  | 2847 | 5.56  | 6.70  | -5.32E+01 | Deleterious   | -5.32E+01 | Deleterious   |
| 81 | p.Pro81Phe | 3961  | 2474 | 5.44  | 5.82  | -5.32E+01 | Deleterious   | -5.32E+01 | Deleterious   |
| 82 | p.Val82Asn | 5118  | 927  | 3.84  | 4.94  | -5.32E+01 | Deleterious   | -5.32E+01 | Deleterious   |
| 82 | p.Val82Lys | 4194  | 977  | 5.15  | 5.20  | -5.32E+01 | Deleterious   | -5.32E+01 | Deleterious   |
| 82 | p.Val82Thr | 11017 | 1270 | 8.28  | 6.76  | -8.29E+00 | Indeterminate | -8.29E+00 | Indeterminate |
| 82 | p.Val82Arg | 8316  | 1978 | 6.25  | 10.53 | -5.32E+01 | Deleterious   | -5.32E+01 | Deleterious   |
| 82 | p.Val82Ser | 8583  | 897  | 6.45  | 4.78  | -7.82E+00 | Indeterminate | -7.82E+00 | Indeterminate |
| 82 | p.Val82Ile | 7271  | 717  | 5.46  | 3.82  | -7.73E+00 | Indeterminate | -7.73E+00 | Indeterminate |
| 82 | p.Val82Met | 5075  | 324  | 3.81  | 1.73  | -1.59E+00 | Neutral       | -1.59E+00 | Neutral       |
| 82 | p.Val82His | 8957  | 1689 | 6.73  | 9.00  | -4.23E+01 | Indeterminate | -3.32E+01 | Indeterminate |
| 82 | p.Val82Gln | 6300  | 686  | 4.73  | 3.65  | -1.31E+01 | Indeterminate | -1.31E+01 | Indeterminate |
| 82 | p.Val82Pro | 7701  | 578  | 1207  | 5.78  | -3.07E+01 | Indeterminate | -3.05E+01 | Indeterminate |
| 82 | p.Val82Leu | 6686  | 586  | 5.02  | 3.12  | -5.30E+00 | Neutral       | -5.30E+00 | Neutral       |
| 82 | p.Val82Asp | 3241  | 694  | 2.43  | 3.70  | -5.32E+01 | Deleterious   | -5.32E+01 | Deleterious   |
| 82 | p.Val82Glu | 6491  | 1072 | 4.88  | 5.71  | -3.99E+01 | Indeterminate | -3.32E+01 | Indeterminate |
| 82 | p.Val82Ala | 8058  | 625  | 6.05  | 3.33  | -2.05E+00 | Neutral       | -2.05E+00 | Neutral       |
| 82 | p.Val82Gly | 4572  | 717  | 3.43  | 3.82  | -4.61E+01 | Indeterminate | -3.32E+01 | Indeterminate |
| 82 | p.Val82Val | 10662 | 821  | 8.01  | 4.37  | -1.06E+00 | Neutral       | -1.06E+00 | Neutral       |
| 82 | p.Val82Tyr | 3733  | 830  | 2.80  | 4.42  | -5.32E+01 | Deleterious   | -5.32E+01 | Deleterious   |
| 82 | p.Val82Cys | 4968  | 509  | 3.73  | 2.71  | -1.39E+01 | Indeterminate | -1.39E+01 | Indeterminate |
| 82 | p.Val82Trp | 4187  | 1143 | 3.14  | 6.09  | -5.32E+01 | Deleterious   | -5.32E+01 | Deleterious   |
| 82 | p.Val82Phe | 8005  | 1107 | 6.01  | 5.90  | -2.13E+01 | Indeterminate | -2.13E+01 | Indeterminate |
| 83 | p.His83Asn | 2209  | 1716 | 5.20  | 5.30  | -5.32E+01 | Deleterious   | -5.32E+01 | Deleterious   |
| 83 | p.His83Lys | 2282  | 2477 | 5.37  | 7.65  | -5.32E+01 | Deleterious   | -5.32E+01 | Deleterious   |
| 83 | p.His83Thr | 1704  | 1097 | 4.01  | 3.39  | -5.32E+01 | Deleterious   | -5.32E+01 | Deleterious   |
| 83 | p.His83Arg | 2229  | 2555 | 5.25  | 7.89  | -5.32E+01 | Deleterious   | -5.32E+01 | Deleterious   |
| 83 | p.His83Ser | 2121  | 1323 | 4.90  | 4.09  | -5.32E+01 | Deleterious   | -5.32E+01 | Deleterious   |
| 83 | p.His83Ile | 2239  | 1501 | 5.27  | 4.64  | -5.32E+01 | Deleterious   | -5.32E+01 | Deleterious   |
| 83 | p.His83Met | 1978  | 448  | 4.66  | 1.38  | -3.07E+01 | Indeterminate | -3.05E+01 | Indeterminate |
| 83 | p.His83His | 2145  | 220  | 5.05  | 0.68  | -1.06E+00 | Neutral       | -1.06E+00 | Neutral       |
| 83 | p.His83Gln | 2092  | 858  | 4.92  | 2.65  | -5.32E+01 | Deleterious   | -5.32E+01 | Deleterious   |
| 83 | p.His83Pro | 2039  | 2411 | 4.80  |       |           |               |           |               |

|    |            |       |       |      |       |           |               |           |               |
|----|------------|-------|-------|------|-------|-----------|---------------|-----------|---------------|
| 84 | p.Asp84Thr | 2464  | 1033  | 3.92 | 3.83  | -5.32E+01 | Deleterious   | -5.32E+01 | Deleterious   |
| 84 | p.Asp84Arg | 3099  | 1815  | 4.94 | 6.73  | -5.32E+01 | Deleterious   | -5.32E+01 | Deleterious   |
| 84 | p.Asp84Ser | 2805  | 443   | 4.47 | 1.64  | -5.32E+01 | Deleterious   | -5.32E+01 | Deleterious   |
| 84 | p.Asp84Ile | 3566  | 2122  | 5.68 | 7.87  | -5.32E+01 | Deleterious   | -5.32E+01 | Deleterious   |
| 84 | p.Asp84Met | 2901  | 1475  | 4.62 | 5.47  | -5.32E+01 | Deleterious   | -5.32E+01 | Deleterious   |
| 84 | p.Asp84His | 3544  | 821   | 5.64 | 3.05  | -5.32E+01 | Deleterious   | -5.32E+01 | Deleterious   |
| 84 | p.Asp84Gln | 2535  | 744   | 4.04 | 2.76  | -5.32E+01 | Deleterious   | -5.32E+01 | Deleterious   |
| 84 | p.Asp84Pro | 3263  | 1893  | 5.20 | 7.02  | -5.32E+01 | Deleterious   | -5.32E+01 | Deleterious   |
| 84 | p.Asp84Leu | 3617  | 2184  | 5.76 | 8.10  | -5.32E+01 | Deleterious   | -5.32E+01 | Deleterious   |
| 84 | p.Asp84Asp | 3069  | 79    | 4.89 | 0.29  | -1.06E+00 | Neutral       | -1.06E+00 | Neutral       |
| 84 | p.Asp84Glu | 2431  | 94    | 3.87 | 0.35  | -1.16E+01 | Indeterminate | -1.16E+01 | Indeterminate |
| 84 | p.Asp84Ala | 4167  | 1843  | 6.64 | 6.84  | -5.32E+01 | Deleterious   | -5.32E+01 | Deleterious   |
| 84 | p.Asp84Gly | 2603  | 1289  | 4.15 | 4.78  | -5.32E+01 | Deleterious   | -5.32E+01 | Deleterious   |
| 84 | p.Asp84Val | 2863  | 1540  | 4.56 | 5.71  | -5.32E+01 | Deleterious   | -5.32E+01 | Deleterious   |
| 84 | p.Asp84Tyr | 3406  | 1751  | 5.42 | 6.50  | -5.32E+01 | Deleterious   | -5.32E+01 | Deleterious   |
| 84 | p.Asp84Cys | 3373  | 512   | 5.37 | 1.90  | -5.32E+01 | Deleterious   | -5.32E+01 | Deleterious   |
| 84 | p.Asp84Trp | 3522  | 2243  | 5.61 | 8.32  | -5.32E+01 | Deleterious   | -5.32E+01 | Deleterious   |
| 84 | p.Asp84Phe | 3758  | 2096  | 5.99 | 7.78  | -5.32E+01 | Deleterious   | -5.32E+01 | Deleterious   |
| 85 | p.Ala85Asn | 5212  | 1526  | 2.82 | 2.47  | -1.83E+01 | Indeterminate | -1.83E+01 | Indeterminate |
| 85 | p.Ala85Lys | 9383  | 4778  | 5.94 | 7.73  | -4.54E+01 | Indeterminate | -4.54E+01 | Indeterminate |
| 85 | p.Ala85Thr | 7427  | 2426  | 4.01 | 3.92  | -1.78E+01 | Indeterminate | -1.78E+01 | Indeterminate |
| 85 | p.Ala85Arg | 8838  | 4487  | 4.78 | 7.26  | -4.72E+01 | Indeterminate | -4.72E+01 | Indeterminate |
| 85 | p.Ala85Ser | 10574 | 2582  | 5.72 | 4.18  | -3.75E+00 | Neutral       | -3.75E+00 | Neutral       |
| 85 | p.Ala85Ile | 11678 | 4130  | 6.31 | 6.68  | -1.43E+01 | Indeterminate | -1.43E+01 | Indeterminate |
| 85 | p.Ala85Met | 6476  | 1133  | 3.50 | 1.83  | -1.40E+00 | Neutral       | -1.40E+00 | Neutral       |
| 85 | p.Ala85His | 7202  | 2718  | 3.89 | 4.40  | -2.74E+01 | Indeterminate | -2.74E+01 | Indeterminate |
| 85 | p.Ala85Gln | 8493  | 2892  | 4.59 | 4.68  | -1.77E+01 | Indeterminate | -1.77E+01 | Indeterminate |
| 85 | p.Ala85Pro | 10997 | 3768  | 6.94 | 6.09  | -1.38E+01 | Indeterminate | -1.38E+01 | Indeterminate |
| 85 | p.Ala85Leu | 10857 | 2524  | 5.87 | 4.08  | -2.77E+00 | Neutral       | -2.77E+00 | Neutral       |
| 85 | p.Ala85Asp | 7167  | 3294  | 3.87 | 5.33  | -4.41E+01 | Indeterminate | -4.41E+01 | Indeterminate |
| 85 | p.Ala85Glu | 7645  | 3405  | 4.13 | 5.51  | -3.91E+01 | Indeterminate | -3.91E+01 | Indeterminate |
| 85 | p.Ala85Ala | 15969 | 3621  | 8.63 | 5.86  | -1.06E+00 | Neutral       | -1.06E+00 | Neutral       |
| 85 | p.Ala85Gly | 13936 | 2718  | 7.53 | 4.40  | -4.57E-01 | Neutral       | -4.57E-01 | Neutral       |
| 85 | p.Ala85Val | 10776 | 3252  | 5.82 | 5.26  | -9.08E+00 | Indeterminate | -9.08E+00 | Indeterminate |
| 85 | p.Ala85Tyr | 6635  | 2743  | 3.59 | 4.44  | -3.67E+01 | Indeterminate | -3.67E+01 | Indeterminate |
| 85 | p.Ala85Cys | 9406  | 1933  | 5.08 | 3.13  | -9.78E+00 | Neutral       | -9.78E+00 | Neutral       |
| 85 | p.Ala85Trp | 6098  | 3377  | 3.30 | 5.46  | -5.32E+01 | Deleterious   | -5.32E+01 | Deleterious   |
| 85 | p.Ala85Phe | 10242 | 4529  | 5.54 | 7.32  | -3.04E+01 | Indeterminate | -3.02E+01 | Indeterminate |
| 86 | p.Ala86Asn | 2738  | 7263  | 5.42 | 6.88  | -5.32E+01 | Deleterious   | -5.32E+01 | Deleterious   |
| 86 | p.Ala86Lys | 1712  | 5339  | 3.39 | 5.06  | -5.32E+01 | Deleterious   | -5.32E+01 | Deleterious   |
| 86 | p.Ala86Thr | 1173  | 286   | 2.32 | 0.27  | -6.25E-02 | Neutral       | -6.25E-02 | Neutral       |
| 86 | p.Ala86Arg | 2701  | 8049  | 5.35 | 7.62  | -5.32E+01 | Deleterious   | -5.32E+01 | Deleterious   |
| 86 | p.Ala86Ser | 1742  | 753   | 3.45 | 0.71  | -2.71E+00 | Neutral       | -2.71E+00 | Neutral       |
| 86 | p.Ala86Ile | 5751  | 1478  | 5.09 | 1.40  | -5.80E+00 | Neutral       | -5.80E+00 | Neutral       |
| 86 | p.Ala86Met | 2759  | 6416  | 5.46 | 6.08  | -5.32E+01 | Deleterious   | -5.32E+01 | Deleterious   |
| 86 | p.Ala86His | 3907  | 10251 | 7.74 | 9.71  | -5.32E+01 | Deleterious   | -5.32E+01 | Deleterious   |
| 86 | p.Ala86Gln | 3641  | 10410 | 7.21 | 9.86  | -5.32E+01 | Deleterious   | -5.32E+01 | Deleterious   |
| 86 | p.Ala86Pro | 3199  | 8498  | 6.34 | 8.05  | -5.32E+01 | Deleterious   | -5.32E+01 | Deleterious   |
| 86 | p.Ala86Leu | 3102  | 7242  | 6.14 | 6.86  | -5.32E+01 | Deleterious   | -5.32E+01 | Deleterious   |
| 86 | p.Ala86Asp | 2882  | 7986  | 5.71 | 7.56  | -5.32E+01 | Deleterious   | -5.32E+01 | Deleterious   |
| 86 | p.Ala86Glu | 3145  | 8838  | 6.23 | 8.27  | -5.32E+01 | Deleterious   | -5.32E+01 | Deleterious   |
| 86 | p.Ala86Ala | 986   | 304   | 1.95 | 0.29  | -1.06E+00 | Neutral       | -1.06E+00 | Neutral       |
| 86 | p.Ala86Gly | 1964  | 522   | 3.89 | 0.49  | -1.98E-02 | Neutral       | -1.98E-02 | Neutral       |
| 86 | p.Ala86Val | 2113  | 649   | 4.18 | 0.61  | -9.64E-02 | Neutral       | -9.64E-02 | Neutral       |
| 86 | p.Ala86Tyr | 2032  | 5898  | 4.02 | 5.59  | -5.32E+01 | Deleterious   | -5.32E+01 | Deleterious   |
| 86 | p.Ala86Cys | 2481  | 507   | 4.91 | 0.48  | -4.00E-05 | Neutral       | -4.00E-05 | Neutral       |
| 86 | p.Ala86Trp | 2661  | 6920  | 5.27 | 6.55  | -5.32E+01 | Deleterious   | -5.32E+01 | Deleterious   |
| 86 | p.Ala86Phe | 2986  | 7970  | 5.91 | 7.55  | -5.32E+01 | Deleterious   | -5.32E+01 | Deleterious   |
| 87 | p.Arg87Asn | 7612  | 236   | 5.72 | 1.26  | -3.51E+00 | Neutral       | -3.51E+00 | Neutral       |
| 87 | p.Arg87Lys | 3377  | 37    | 2.54 | 0.20  | -7.53E-04 | Neutral       | -7.53E-04 | Neutral       |
| 87 | p.Arg87Thr | 4254  | 127   | 3.20 | 0.68  | -7.09E+00 | Indeterminate | -7.09E+00 | Indeterminate |
| 87 | p.Arg87Arg | 5869  | 137   | 5.16 | 1.03  | -1.06E+00 | Neutral       | -1.06E+00 | Neutral       |
| 87 | p.Arg87Ser | 3450  | 208   | 2.59 | 1.11  | -5.32E+01 | Deleterious   | -5.32E+01 | Deleterious   |
| 87 | p.Arg87Ile | 4046  | 129   | 3.04 | 0.69  | -9.73E+00 | Indeterminate | -9.73E+00 | Indeterminate |
| 87 | p.Arg87Met | 7168  | 345   | 5.38 | 1.84  | -1.99E+01 | Indeterminate | -1.99E+01 | Indeterminate |
| 87 | p.Arg87His | 4551  | 247   | 3.42 | 1.32  | -3.99E+01 | Indeterminate | -3.92E+01 | Indeterminate |
| 87 | p.Arg87Gln | 7646  | 574   | 4.52 | 2.41  | -3.25E+01 | Indeterminate | -3.18E+01 | Indeterminate |
| 87 | p.Arg87Pro | 3416  | 3365  | 2.57 | 17.92 | -5.32E+01 | Deleterious   | -5.32E+01 | Deleterious   |
| 87 | p.Arg87Leu | 4276  | 160   | 3.21 | 0.85  | -1.57E+01 | Indeterminate | -1.57E+01 | Indeterminate |
| 87 | p.Arg87Asp | 4569  | 777   | 3.43 | 4.14  | -5.32E+01 | Deleterious   | -5.32E+01 | Deleterious   |
| 87 | p.Arg87Glu | 6786  | 626   | 5.10 | 3.33  | -5.32E+01 | Deleterious   | -5.32E+01 | Deleterious   |
| 87 | p.Arg87Ala | 7639  | 562   | 5.74 | 2.99  | -5.30E+01 | Indeterminate | -3.32E+01 | Indeterminate |
| 87 | p.Arg87Gly | 5541  | 127   | 4.16 | 0.68  | -1.07E+00 | Neutral       | -1.07E+00 | Neutral       |
| 87 | p.Arg87Val | 6100  | 198   | 4.58 | 1.05  | -6.11E+00 | Indeterminate | -6.11E+00 | Indeterminate |
| 87 | p.Arg87Tyr | 2406  | 123   | 1.81 | 0.66  | -5.32E+01 | Deleterious   | -5.32E+01 | Deleterious   |
| 87 | p.Arg87Cys | 8971  | 188   | 6.74 | 1.00  | -1.06E-01 | Neutral       | -1.06E-01 | Neutral       |
| 87 | p.Arg87Trp | 8616  | 4952  | 6.47 | 26.37 | -5.32E+01 | Deleterious   | -5.32E+01 | Deleterious   |
| 87 | p.Arg87Phe | 7490  | 267   | 5.63 | 1.42  | -6.79E+00 | Indeterminate | -6.79E+00 | Indeterminate |
| 88 | p.Glu88Asn | 7680  | 5284  | 4.42 | 4.15  | -8.96E+00 | Indeterminate | -8.96E+00 | Indeterminate |
| 88 | p.Glu88Lys | 9106  | 9400  | 5.25 | 7.39  | -2.66E+01 | Indeterminate | -2.65E+01 | Indeterminate |
| 88 | p.Glu88Thr | 5283  | 3622  | 3.04 | 2.85  | -1.37E+01 | Indeterminate | -1.37E+01 | Indeterminate |
| 88 | p.Glu88Arg | 9435  | 9436  | 5.44 | 7.42  | -2.37E+01 | Indeterminate | -2.37E+01 | Indeterminate |
| 88 | p.Glu88Ser | 6793  | 4359  | 3.91 | 3.43  | -8.02E+00 | Indeterminate | -8.02E+00 | Indeterminate |
| 88 | p.Glu88Ile | 7738  | 4822  | 4.46 | 3.79  | -5.97E+00 | Indeterminate | -5.97E+00 | Indeterminate |
| 88 | p.Glu88Met | 9862  | 6110  | 5.68 | 4.80  | -4.02E+00 | Neutral       | -4.02E+00 | Neutral       |
| 88 | p.Glu88His | 6938  | 5151  | 4.00 | 4.05  | -1.32E+01 | Indeterminate | -1.32E+01 | Indeterminate |
| 88 | p.Glu88Gln | 7089  | 4779  | 4.08 | 3.76  | -9.17E+00 | Indeterminate | -9.17E+00 | Indeterminate |
| 88 | p.Glu88Pro | 6230  | 10321 | 3.59 | 8.11  | -5.32E+01 | Deleterious   | -5.32E+01 | Deleterious   |
| 88 | p.Glu88Leu | 7368  | 5329  | 4.24 | 4.19  | -1.13E+01 | Indeterminate | -1.13E+01 | Indeterminate |
| 88 | p.Glu88Asp | 8787  | 6308  | 5.06 | 4.96  | -8.89E+00 | Indeterminate | -8.89E+00 | Indeterminate |
| 88 | p.Glu88Glu | 12109 | 6412  | 6.98 | 5.04  | -1.06E+00 | Neutral       | -1.06E+00 | Neutral       |
| 88 | p.Glu88Ala | 6884  | 3920  | 3.97 | 3.08  | -4.75E+00 | Neutral       | -4.75E+00 | Neutral       |
| 88 | p.Glu88Gly | 8821  | 5602  | 5.08 | 4.40  | -5.36E+00 | Neutral       | -5.36E+00 | Neutral       |
| 88 | p.Glu88Val | 16505 | 11466 | 9.51 | 9.01  | -3.02E+00 | Neutral       | -3.02E+00 | Neutral       |
| 88 | p.Glu88Tyr | 9528  | 6744  | 5.49 | 5.30  | -7.59E+00 | Indeterminate | -7.59E+00 | Indeterminate |
| 88 | p.Glu88Cys | 8363  | 5109  | 4.82 | 4.02  | -4.88E+00 | Neutral       | -4.88E+00 | Neutral       |
| 88 | p.Glu88Trp | 10256 | 6510  | 5.91 | 5.12  | -4.25E+00 | Neutral       | -4.25E+00 | Neutral       |
| 88 | p.Glu88Phe | 8799  | 6563  | 5.07 | 5.16  | -1.02E+01 | Indeterminate | -1.02E+01 | Indeterminate |
| 89 | p.Gly89Asn | 2627  | 478   | 6.60 | 0.67  | -1.70E+01 | Indeterminate | -1.70E+01 | Indeterminate |
| 89 | p.Gly89Lys | 4247  | 3480  | 5.82 | 4.87  | -5.32E+01 | Deleterious   | -5.32E+01 | Deleterious   |
| 89 | p.Gly89Thr | 3807  | 5129  | 5.22 | 7.18  | -5.32E+01 | Deleterious   | -5.32E+01 | Deleterious   |
| 89 | p.Gly89Arg | 3355  | 3087  | 4.60 | 4.32  | -5.32E+01 | Deleterious   | -5.32E+01 | Deleterious   |
| 89 | p.Gly89Ser | 3824  | 1590  | 5.24 | 2.23  | -5.32E+01 | Deleterious   | -5.32E+01 | Deleterious   |
| 89 | p.Gly89Ile | 3356  | 5608  | 4.60 | 7.85  | -5.32E+01 | Deleterious   | -5.32E+01 | Deleterious   |
| 89 | p.Gly89Met | 3081  | 3692  | 4.22 | 5.17  | -5.32E+01 | Deleterious   | -5.32E+01 | Deleterious   |
| 89 | p.Gly89His | 3103  | 3096  | 4.25 | 4.33  | -5.32E+01 | Deleterious   | -5.32E+01 | Deleterious   |
| 89 | p.Gly89Gln | 3330  | 2815  | 4.56 | 3.94  | -5.32E+01 | Deleterious   | -5.32E+01 | Deleterious   |
| 89 | p.Gly89Pro | 4288  | 4970  | 5.87 | 6.96  | -5.32E+01 | Deleterious   | -5.32E+01 | Deleterious   |
| 89 | p.Gly89Leu | 3791  | 5275  | 5.19 | 7.38  | -5.32E+01 | Deleterious   | -5.32E+01 | Deleterious   |
| 89 | p.Gly89Asp | 3504  | 1266  | 4.80 | 1.77  | -5.32E+01 | Deleterious   | -5.32E+01 | Deleterious   |
| 89 | p.Gly89Glu | 4701  | 4959  | 6.44 | 6.94  | -5.32E+01 | Deleterious   | -5.32E+01 | Deleterious   |
| 89 | p.Gly89Ala | 2968  | 631   | 4.07 | 0.88  | -2.36E+01 | Indeterminate | -2.36E+01 | Indeterminate |
| 89 | p.Gly89Gly | 2868  | 294   | 3.93 | 0.41  | -1.06E+00 | Neutral       | -1.06E+00 | Neutral       |
| 89 | p.Gly89Val | 3667  | 5622  | 5.02 | 3.87  | -5.32E+01 | Deleterious   | -5.32E+01 | Deleterious   |
| 89 | p.Gly89Tyr | 3624  | 5208  | 4.96 | 7.29  | -5.32E+01 | Deleterious   | -5.32E+01 | Deleterious   |
| 89 | p.Gly89Cys | 4087  | 1699  | 5.60 | 2.38  | -5.32E+01 | Deleterious   | -5.32E+01 | Deleterious   |
| 89 | p.Gly89Trp | 4212  | 6145  | 5.77 | 8.60  | -5.32E+01 | Deleterious   | -5.32E+01 | Deleterious   |
| 89 | p.Gly89Phe | 4558  | 6406  | 6.24 | 8.97  | -5.32E+01 | Deleterious   | -5.32E+01 | Deleterious   |
| 90 | p.Phe90Asn | 17215 | 3468  | 7.19 | 6.33  | -7.65E-02 | Neutral       | -7.65E-02 | Neutral       |
| 90 | p.Phe90Lys | 12298 | 3370  | 5.14 | 6.15  | -2.63E+00 | Neutral       | -2.63E+00 | Neutral       |
| 90 | p.Phe90Thr | 8757  | 2286  | 3.66 | 4.17  | -3.69E+00 | Neutral       | -3.69E+00 | Neutral       |
| 90 | p.Phe90Arg | 14675 | 3186  | 6.13 | 5.81  | -3.08E-01 | Neutral       | -3.08E-01 | Neutral       |
| 90 | p.Phe90Ser | 12195 | 2607  | 5.09 | 4.76  | -4.70E-01 | Neutral       | -4.70E-01 | Neutral       |
| 90 | p.Phe90Ile | 9858  | 1941  | 4.12 | 3.54  | -4.24E-01 | Neutral       | -4.24E-01 | Neutral       |
| 90 | p.Phe90Met | 9884  | 1676  | 4.13 | 3.06  | -8.85E-02 | Neutral       | -8.85E-02 | Neutral       |
| 90 | p.Phe90His | 94    |       |      |       |           |               |           |               |

|    |            |       |      |      |       |           |               |           |               |
|----|------------|-------|------|------|-------|-----------|---------------|-----------|---------------|
| 91 | p.Leu91Lys | 7857  | 938  | 4.67 | 4.49  | -7.34E+00 | Indeterminate | -7.34E+00 | Indeterminate |
| 91 | p.Leu91Thr | 7096  | 862  | 4.22 | 4.13  | -8.95E+00 | Indeterminate | -8.95E+00 | Indeterminate |
| 91 | p.Leu91Arg | 10604 | 1024 | 6.30 | 4.91  | -1.49E+00 | Neutral       | -1.49E+00 | Neutral       |
| 91 | p.Leu91Ser | 8848  | 1433 | 5.26 | 6.86  | -1.82E+01 | Indeterminate | -1.82E+01 | Indeterminate |
| 91 | p.Leu91Ile | 5518  | 782  | 3.28 | 3.75  | -1.95E+01 | Indeterminate | -1.95E+01 | Indeterminate |
| 91 | p.Leu91Met | 9789  | 2126 | 5.82 | 10.18 | -3.62E+01 | Indeterminate | -3.31E+01 | Indeterminate |
| 91 | p.Leu91His | 6249  | 874  | 3.71 | 4.19  | -1.66E+01 | Indeterminate | -1.66E+01 | Indeterminate |
| 91 | p.Leu91Gln | 7540  | 500  | 4.48 | 2.40  | -1.59E-01 | Neutral       | -1.59E-01 | Neutral       |
| 91 | p.Leu91Pro | 9411  | 1199 | 5.59 | 5.74  | -7.49E+00 | Indeterminate | -7.49E+00 | Indeterminate |
| 91 | p.Leu91Leu | 7934  | 662  | 4.72 | 3.17  | -1.06E+00 | Neutral       | -1.06E+00 | Neutral       |
| 91 | p.Leu91Asp | 6698  | 730  | 3.98 | 3.50  | -6.28E+00 | Indeterminate | -6.28E+00 | Indeterminate |
| 91 | p.Leu91Glu | 8804  | 987  | 5.23 | 4.73  | -4.76E+00 | Neutral       | -4.76E+00 | Neutral       |
| 91 | p.Leu91Ala | 8686  | 744  | 5.16 | 3.56  | -1.03E+00 | Neutral       | -1.03E+00 | Neutral       |
| 91 | p.Leu91Gly | 9719  | 1125 | 5.78 | 5.39  | -4.74E+00 | Neutral       | -4.74E+00 | Neutral       |
| 91 | p.Leu91Val | 11061 | 1191 | 6.58 | 5.71  | -2.65E+00 | Neutral       | -2.65E+00 | Neutral       |
| 91 | p.Leu91Tyr | 5704  | 1472 | 3.39 | 7.05  | -5.32E+01 | Deleterious   | -5.32E+01 | Deleterious   |
| 91 | p.Leu91Cys | 8443  | 679  | 5.02 | 3.25  | -6.85E-01 | Neutral       | -6.85E-01 | Neutral       |
| 91 | p.Leu91Trp | 10058 | 1333 | 5.98 | 6.39  | -8.02E+00 | Indeterminate | -8.02E+00 | Indeterminate |
| 91 | p.Leu91Phe | 9772  | 1720 | 5.81 | 8.24  | -2.11E+01 | Indeterminate | -2.11E+01 | Indeterminate |
| 92 | p.Asp92Asn | 3059  | 1748 | 3.61 | 3.58  | -3.34E+00 | Neutral       | -3.34E+00 | Neutral       |
| 92 | p.Asp92Lys | 2980  | 1988 | 3.51 | 4.07  | -7.05E+00 | Indeterminate | -7.05E+00 | Indeterminate |
| 92 | p.Asp92Thr | 3372  | 1636 | 3.97 | 3.35  | -1.00E+00 | Neutral       | -1.00E+00 | Neutral       |
| 92 | p.Asp92Arg | 5018  | 2780 | 5.92 | 5.69  | -1.01E+00 | Neutral       | -1.01E+00 | Neutral       |
| 92 | p.Asp92Ser | 2101  | 1098 | 2.48 | 2.25  | -3.99E+00 | Neutral       | -3.99E+00 | Neutral       |
| 92 | p.Asp92Ile | 5343  | 3437 | 6.30 | 7.04  | -2.32E+00 | Neutral       | -2.32E+00 | Neutral       |
| 92 | p.Asp92Met | 5318  | 2816 | 6.27 | 5.77  | -6.09E-01 | Neutral       | -6.09E-01 | Neutral       |
| 92 | p.Asp92His | 2930  | 1735 | 3.45 | 3.55  | -4.28E+00 | Neutral       | -4.28E+00 | Neutral       |
| 92 | p.Asp92Gln | 5536  | 653  | 6.53 | 6.39  | -8.92E+01 | Neutral       | -8.92E+01 | Neutral       |
| 92 | p.Asp92Pro | 5268  | 3172 | 6.21 | 6.50  | -1.59E+00 | Neutral       | -1.59E+00 | Neutral       |
| 92 | p.Asp92Leu | 6269  | 3445 | 7.39 | 7.06  | -5.25E-01 | Neutral       | -5.25E-01 | Neutral       |
| 92 | p.Asp92Asp | 4573  | 2475 | 5.39 | 5.07  | -1.06E+00 | Neutral       | -1.06E+00 | Neutral       |
| 92 | p.Asp92Glu | 3137  | 1867 | 3.70 | 3.82  | -3.93E+00 | Neutral       | -3.93E+00 | Neutral       |
| 92 | p.Asp92Ala | 6689  | 4069 | 7.88 | 8.33  | -9.91E-01 | Neutral       | -9.91E-01 | Neutral       |
| 92 | p.Asp92Gly | 3137  | 1980 | 3.70 | 4.05  | -5.17E+00 | Neutral       | -5.17E+00 | Neutral       |
| 92 | p.Asp92Val | 5507  | 3063 | 6.49 | 6.27  | -8.22E+00 | Neutral       | -8.22E+01 | Neutral       |
| 92 | p.Asp92Tyr | 2568  | 1440 | 3.03 | 2.95  | -4.06E+00 | Neutral       | -4.06E+00 | Neutral       |
| 92 | p.Asp92Cys | 5479  | 2909 | 6.46 | 5.96  | -5.73E-01 | Neutral       | -5.73E-01 | Neutral       |
| 92 | p.Asp92Trp | 2854  | 1628 | 3.36 | 3.33  | -3.72E+00 | Neutral       | -3.72E+00 | Neutral       |
| 92 | p.Asp92Phe | 3697  | 2426 | 4.36 | 4.97  | -4.82E+00 | Neutral       | -4.82E+00 | Neutral       |
| 93 | p.Thr93Asn | 12872 | 1136 | 4.39 | 3.41  | -1.65E+01 | Indeterminate | -1.65E+01 | Indeterminate |
| 93 | p.Thr93Lys | 10656 | 1950 | 3.64 | 5.86  | -5.32E+01 | Deleterious   | -5.32E+01 | Deleterious   |
| 93 | p.Thr93Thr | 12435 | 599  | 4.24 | 1.80  | -1.06E+00 | Neutral       | -1.06E+00 | Neutral       |
| 93 | p.Thr93Arg | 12522 | 1486 | 4.47 | 4.47  | -3.73E+01 | Indeterminate | -3.31E+01 | Indeterminate |
| 93 | p.Thr93Ser | 11234 | 798  | 3.86 | 2.40  | -8.91E+00 | Indeterminate | -8.91E+00 | Indeterminate |
| 93 | p.Thr93Ile | 13017 | 614  | 4.44 | 1.85  | -8.11E-01 | Neutral       | -8.11E-01 | Neutral       |
| 93 | p.Thr93Met | 14173 | 1206 | 4.84 | 3.62  | -1.33E+01 | Indeterminate | -1.33E+01 | Indeterminate |
| 93 | p.Thr93His | 19146 | 2259 | 6.53 | 6.79  | -2.59E+01 | Indeterminate | -2.59E+01 | Indeterminate |
| 93 | p.Thr93Gln | 17574 | 1861 | 6.00 | 5.59  | -2.08E+01 | Indeterminate | -2.08E+01 | Indeterminate |
| 93 | p.Thr93Pro | 18332 | 5525 | 6.26 | 16.61 | -5.32E+01 | Deleterious   | -5.32E+01 | Deleterious   |
| 93 | p.Thr93Leu | 15110 | 1179 | 5.16 | 3.54  | -9.12E+00 | Indeterminate | -9.12E+00 | Indeterminate |
| 93 | p.Thr93Asp | 11110 | 1576 | 3.79 | 4.74  | -5.32E+01 | Deleterious   | -5.32E+01 | Deleterious   |
| 93 | p.Thr93Glu | 5928  | 693  | 2.02 | 2.08  | -5.32E+01 | Deleterious   | -5.32E+01 | Deleterious   |
| 93 | p.Thr93Ala | 18371 | 2050 | 6.27 | 6.16  | -2.31E+01 | Indeterminate | -2.31E+01 | Indeterminate |
| 93 | p.Thr93Gly | 21093 | 2490 | 7.20 | 7.48  | -2.38E+01 | Indeterminate | -2.38E+01 | Indeterminate |
| 93 | p.Thr93Val | 14806 | 1033 | 5.05 | 3.10  | -5.99E+00 | Indeterminate | -5.99E+00 | Indeterminate |
| 93 | p.Thr93Tyr | 15176 | 2095 | 5.18 | 6.30  | -4.55E+01 | Indeterminate | -3.32E+01 | Indeterminate |
| 93 | p.Thr93Cys | 14861 | 1164 | 5.07 | 3.50  | -9.44E+00 | Indeterminate | -9.44E+00 | Indeterminate |
| 93 | p.Thr93Trp | 16976 | 1890 | 5.79 | 5.68  | -2.47E+01 | Indeterminate | -2.47E+01 | Indeterminate |
| 93 | p.Thr93Phe | 17510 | 1660 | 5.98 | 5.01  | -1.52E+01 | Indeterminate | -1.52E+01 | Indeterminate |
| 94 | p.Leu94Asn | 1461  | 780  | 4.07 | 2.20  | -3.44E+01 | Indeterminate | -3.27E+01 | Indeterminate |
| 94 | p.Leu94Lys | 2375  | 3419 | 6.61 | 9.64  | -5.32E+01 | Deleterious   | -5.32E+01 | Deleterious   |
| 94 | p.Leu94Thr | 1880  | 1076 | 5.23 | 3.03  | -3.32E+01 | Indeterminate | -3.22E+01 | Indeterminate |
| 94 | p.Leu94Arg | 2092  | 3934 | 5.82 | 11.09 | -5.32E+01 | Deleterious   | -5.32E+01 | Deleterious   |
| 94 | p.Leu94Ser | 1901  | 421  | 5.29 | 1.19  | -4.70E-01 | Neutral       | -4.70E-01 | Neutral       |
| 94 | p.Leu94Ile | 1867  | 295  | 5.20 | 0.83  | -8.36E-03 | Neutral       | -8.36E-03 | Neutral       |
| 94 | p.Leu94Met | 432   | 42   | 1.20 | 0.12  | -8.41E-03 | Neutral       | -8.41E-03 | Neutral       |
| 94 | p.Leu94His | 1805  | 3659 | 5.02 | 10.31 | -5.32E+01 | Deleterious   | -5.32E+01 | Deleterious   |
| 94 | p.Leu94Gln | 1288  | 1435 | 3.58 | 4.04  | -5.32E+01 | Deleterious   | -5.32E+01 | Deleterious   |
| 94 | p.Leu94Pro | 2142  | 2900 | 5.96 | 8.17  | -5.32E+01 | Deleterious   | -5.32E+01 | Deleterious   |
| 94 | p.Leu94Leu | 1575  | 363  | 4.38 | 1.02  | -1.06E+00 | Neutral       | -1.06E+00 | Neutral       |
| 94 | p.Leu94Asp | 2051  | 3654 | 5.71 | 10.30 | -5.32E+01 | Deleterious   | -5.32E+01 | Deleterious   |
| 94 | p.Leu94Glu | 2084  | 2145 | 5.80 | 6.04  | -5.32E+01 | Deleterious   | -5.32E+01 | Deleterious   |
| 94 | p.Leu94Ala | 946   | 501  | 2.63 | 1.41  | -4.70E+01 | Indeterminate | -3.32E+01 | Indeterminate |
| 94 | p.Leu94Gly | 1187  | 1220 | 3.30 | 3.44  | -5.32E+01 | Deleterious   | -5.32E+01 | Deleterious   |
| 94 | p.Leu94Val | 1555  | 436  | 4.33 | 1.23  | -3.56E+00 | Neutral       | -3.56E+00 | Neutral       |
| 94 | p.Leu94Tyr | 1270  | 2783 | 3.53 | 7.84  | -5.32E+01 | Deleterious   | -5.32E+01 | Deleterious   |
| 94 | p.Leu94Cys | 2850  | 1202 | 7.93 | 3.39  | -8.77E+00 | Indeterminate | -8.77E+00 | Indeterminate |
| 94 | p.Leu94Trp | 2406  | 4027 | 6.70 | 11.35 | -5.32E+01 | Deleterious   | -5.32E+01 | Deleterious   |
| 94 | p.Leu94Phe | 2763  | 1193 | 7.69 | 3.36  | -9.94E+00 | Indeterminate | -9.94E+00 | Indeterminate |
| 95 | p.Val95Asn | 7232  | 2182 | 3.02 | 3.98  | -4.64E+00 | Neutral       | -4.64E+00 | Neutral       |
| 95 | p.Val95Lys | 10963 | 2844 | 4.58 | 5.19  | -8.25E-01 | Neutral       | -8.25E-01 | Neutral       |
| 95 | p.Val95Thr | 5808  | 1609 | 2.43 | 2.94  | -4.38E+00 | Neutral       | -4.38E+00 | Neutral       |
| 95 | p.Val95Arg | 9203  | 2809 | 3.84 | 5.13  | -3.32E+00 | Neutral       | -3.32E+00 | Neutral       |
| 95 | p.Val95Ser | 6861  | 2066 | 2.87 | 3.77  | -4.99E+00 | Neutral       | -4.99E+00 | Neutral       |
| 95 | p.Val95Ile | 8681  | 2394 | 3.63 | 4.37  | -2.11E+00 | Neutral       | -2.11E+00 | Neutral       |
| 95 | p.Val95Met | 4894  | 1367 | 2.04 | 2.49  | -5.88E+00 | Indeterminate | -5.88E+00 | Indeterminate |
| 95 | p.Val95His | 7829  | 1699 | 3.27 | 3.10  | -4.78E-01 | Neutral       | -4.78E-01 | Neutral       |
| 95 | p.Val95Gln | 2718  | 740  | 1.14 | 1.35  | -1.13E+01 | Indeterminate | -1.13E+01 | Indeterminate |
| 95 | p.Val95Pro | 5472  | 7300 | 2.29 | 13.32 | -5.32E+01 | Deleterious   | -5.32E+01 | Deleterious   |
| 95 | p.Val95Leu | 5183  | 1187 | 2.16 | 2.17  | -1.93E+00 | Neutral       | -1.93E+00 | Neutral       |
| 95 | p.Val95Asp | 7731  | 2073 | 3.23 | 3.78  | -2.24E+00 | Neutral       | -2.24E+00 | Neutral       |
| 95 | p.Val95Glu | 7407  | 2177 | 3.09 | 3.97  | -3.95E+00 | Neutral       | -3.95E+00 | Neutral       |
| 95 | p.Val95Ala | 6406  | 1317 | 2.68 | 2.40  | -5.32E-01 | Neutral       | -5.32E-01 | Neutral       |
| 95 | p.Val95Gly | 9626  | 2766 | 4.02 | 5.05  | -2.19E+00 | Neutral       | -2.19E+00 | Neutral       |
| 95 | p.Val95Val | 12313 | 3434 | 5.14 | 6.27  | -1.06E+00 | Neutral       | -1.06E+00 | Neutral       |
| 95 | p.Val95Tyr | 5221  | 1479 | 2.18 | 2.70  | -5.69E+00 | Neutral       | -5.69E+00 | Neutral       |
| 95 | p.Val95Cys | 6989  | 1603 | 2.92 | 2.92  | -1.01E+00 | Neutral       | -1.01E+00 | Neutral       |
| 95 | p.Val95Trp | 6758  | 2279 | 2.82 | 4.16  | -8.18E+00 | Indeterminate | -8.18E+00 | Indeterminate |
| 95 | p.Val95Phe | 5986  | 1842 | 3.37 | 3.37  | -6.73E+00 | Indeterminate | -6.73E+00 | Indeterminate |
| 96 | p.Val96Asn | 3048  | 665  | 5.44 | 4.93  | -2.60E-01 | Neutral       | -7.47E+00 | Indeterminate |
| 96 | p.Val96Lys | 4337  | 1119 | 7.74 | 8.30  | -4.20E-01 | Neutral       | -1.03E+00 | Neutral       |
| 96 | p.Val96Thr | 3524  | 706  | 6.29 | 5.23  | -5.74E-02 | Neutral       | -1.48E+00 | Neutral       |
| 96 | p.Val96Arg | 4400  | 1080 | 7.85 | 8.01  | -8.59E-03 | Neutral       | -1.19E+00 | Neutral       |
| 96 | p.Val96Ser | 3519  | 765  | 6.28 | 5.67  | -6.84E-01 | Neutral       | -2.52E-01 | Neutral       |
| 96 | p.Val96Ile | 1854  | 453  | 3.31 | 3.36  | -3.33E-02 | Neutral       | -6.40E+00 | Neutral       |
| 96 | p.Val96Met | 2021  | 408  | 3.61 | 3.02  | -4.52E-01 | Neutral       | -1.46E+00 | Neutral       |
| 96 | p.Val96His | 1796  | 521  | 3.60 | 3.75  | -4.03E+00 | Neutral       | -3.31E+00 | Neutral       |
| 96 | p.Val96Gln | 2870  | 711  | 5.12 | 5.27  | -9.26E-01 | Neutral       | -4.04E+00 | Neutral       |
| 96 | p.Val96Pro | 2688  | 727  | 4.80 | 5.39  | -1.94E+00 | Neutral       | -8.38E-01 | Neutral       |
| 96 | p.Val96Leu | 1684  | 426  | 3.01 | 3.16  | -3.19E+00 | Neutral       | -1.33E+01 | Indeterminate |
| 96 | p.Val96Asp | 2748  | 651  | 4.90 | 4.83  | -3.47E-01 | Neutral       | -1.34E+01 | Indeterminate |
| 96 | p.Val96Glu | 3956  | 740  | 7.06 | 5.49  | -6.84E-02 | Neutral       | -2.41E+00 | Neutral       |
| 96 | p.Val96Gly | 1027  | 328  | 1.83 | 2.43  | -1.57E+01 | Indeterminate | -4.25E+01 | Indeterminate |
| 96 | p.Val96Val | 2331  | 764  | 4.16 | 5.66  | -4.46E+00 | Indeterminate | -1.61E+00 | Neutral       |
| 96 | p.Val96Arg | 4346  | 1259 | 7.76 | 9.23  | -1.06E+00 | Neutral       | -1.06E+00 | Neutral       |
| 96 | p.Val96Tyr | 1651  | 394  | 2.95 | 2.92  | -2.41E+00 | Neutral       | -8.07E+00 | Indeterminate |
| 96 | p.Val96Cys | 3437  | 820  | 6.13 | 6.08  | -5.23E-03 | Neutral       | -1.13E+01 | Indeterminate |
| 96 | p.Val96Trp | 2216  | 450  | 3.96 | 3.34  | -3.61E-01 | Neutral       | -2.16E+01 | Indeterminate |
| 96 | p.Val96Phe | 2574  | 536  | 4.59 | 3.97  | -2.85E-01 | Neutral       | -5.30E+00 | Neutral       |
| 97 | p.Leu97Asn | 2906  | 1928 | 3.97 | 5.53  | -5.32E+01 | Deleterious   | -5.32E+01 | Deleterious   |
| 97 | p.Leu97Lys | 5234  | 3867 | 7.14 | 11.09 | -5.32E+01 | Deleterious   | -5.32E+01 | Deleterious   |
| 97 | p.Leu97Thr | 2517  | 1324 | 3.43 | 3.80  | -5.32E+01 | Deleterious   | -5.32E+01 | Deleterious   |
| 97 | p.Leu97Arg | 3861  | 2940 | 5.27 | 8.43  | -5.32E+01 | Deleterious   | -5.32E+01 | Deleterious   |
| 97 | p.Leu97Ser | 5025  | 3430 | 6.86 | 9.84  | -5.32E+01 | Deleterious   | -5.32E+01 | Deleterious   |
| 97 | p.Leu97Ile | 3028  | 229  | 4.13 | 0.66  | -2.64E-01 | Neutral       | -2.64E-01 | Neutral       |
| 97 | p.Leu97Met | 2875  | 178  | 3.92 | 0.51  | -3.03E-02 | Neutral       | -3.03E-02 | Neutral       |
| 97 | p.Leu97His | 2448  | 1356 | 3.34 | 3.89  | -5.32E+01 | Deleterious   |           |               |

|     |             |                   |       |       |       |       |           |               |           |               |
|-----|-------------|-------------------|-------|-------|-------|-------|-----------|---------------|-----------|---------------|
| 98  | p.His98Asn  |                   | 6962  | 3204  | 5.23  | 4.40  | -6.69E-01 | Neutral       | -6.69E-01 | Neutral       |
| 98  | p.His98Lys  |                   | 3696  | 1535  | 2.77  | 2.11  | -1.47E+00 | Neutral       | -1.47E+00 | Neutral       |
| 98  | p.His98Thr  |                   | 4272  | 2069  | 3.21  | 2.84  | -2.77E+00 | Neutral       | -2.77E+00 | Neutral       |
| 98  | p.His98Arg  |                   | 7635  | 3456  | 5.73  | 4.75  | -4.48E-01 | Neutral       | -4.48E-01 | Neutral       |
| 98  | p.His98Ser  |                   | 6500  | 3794  | 4.88  | 5.21  | -3.55E+00 | Neutral       | -3.55E+00 | Neutral       |
| 98  | p.His98Ile  |                   | 6867  | 3037  | 5.15  | 4.17  | -4.98E-01 | Neutral       | -4.98E-01 | Neutral       |
| 98  | p.His98Met  |                   | 5455  | 2395  | 4.09  | 3.29  | -8.72E-01 | Neutral       | -8.72E-01 | Neutral       |
| 98  | p.His98His  | Synonymous        | 5527  | 2503  | 4.15  | 3.44  | -1.06E+00 | Neutral       | -1.06E+00 | Neutral       |
| 98  | p.His98Gln  |                   | 4315  | 2331  | 3.24  | 3.20  | -4.71E+00 | Neutral       | -4.71E+00 | Neutral       |
| 98  | p.His98Pro  | Deleterious       | 4682  | 11420 | 3.51  | 15.68 | -5.32E+01 | Deleterious   | -5.32E+01 | Deleterious   |
| 98  | p.His98Leu  |                   | 5788  | 3026  | 4.34  | 4.16  | -2.42E+00 | Neutral       | -2.42E+00 | Neutral       |
| 98  | p.His98Asp  |                   | 6699  | 3256  | 4.28  | 4.47  | -3.97E+00 | Neutral       | -3.97E+00 | Neutral       |
| 98  | p.His98Glu  |                   | 8665  | 4094  | 6.50  | 5.62  | -4.51E-01 | Neutral       | -4.51E-01 | Neutral       |
| 98  | p.His98Ala  |                   | 8015  | 3389  | 6.02  | 4.65  | -1.99E-01 | Neutral       | -1.99E-01 | Neutral       |
| 98  | p.His98Gly  |                   | 5917  | 3101  | 4.44  | 4.26  | -2.35E+00 | Neutral       | -2.35E+00 | Neutral       |
| 98  | p.His98Val  |                   | 12966 | 6294  | 9.73  | 8.64  | -1.58E-01 | Neutral       | -1.58E-01 | Neutral       |
| 98  | p.His98Tyr  |                   | 8668  | 4200  | 6.51  | 5.77  | -5.61E-01 | Neutral       | -5.61E-01 | Neutral       |
| 98  | p.His98Cys  |                   | 7543  | 3723  | 5.66  | 5.11  | -9.36E-01 | Neutral       | -9.36E-01 | Neutral       |
| 98  | p.His98Phe  |                   | 7222  | 3059  | 5.42  | 4.20  | -2.87E-01 | Neutral       | -2.87E-01 | Neutral       |
| 98  | p.His98Phe  |                   | 6849  | 2927  | 5.14  | 4.02  | -3.69E-01 | Neutral       | -3.69E-01 | Neutral       |
| 99  | p.Arg99Asn  |                   | 2603  | 447   | 5.58  | 2.32  | -8.76E+00 | Indeterminate | -8.76E+00 | Indeterminate |
| 99  | p.Arg99Lys  |                   | 2018  | 299   | 4.32  | 1.55  | -6.84E+00 | Indeterminate | -6.84E+00 | Indeterminate |
| 99  | p.Arg99Thr  |                   | 1591  | 288   | 3.41  | 1.49  | -1.80E+01 | Indeterminate | -1.80E+01 | Indeterminate |
| 99  | p.Arg99Arg  | Synonymous        | 3293  | 407   | 7.05  | 2.11  | -1.06E+00 | Neutral       | -1.06E+00 | Neutral       |
| 99  | p.Arg99Ser  |                   | 2572  | 463   | 5.51  | 2.40  | -1.06E+01 | Indeterminate | -1.06E+01 | Indeterminate |
| 99  | p.Arg99Ile  |                   | 2237  | 347   | 4.79  | 1.80  | -7.17E+00 | Indeterminate | -7.17E+00 | Indeterminate |
| 99  | p.Arg99Met  |                   | 2430  | 480   | 5.20  | 2.49  | -1.53E+01 | Indeterminate | -1.53E+01 | Indeterminate |
| 99  | p.Arg99His  |                   | 2305  | 267   | 1.38  | 1.38  | -1.53E+00 | Neutral       | -1.53E+00 | Neutral       |
| 99  | p.Arg99Gln  |                   | 1726  | 197   | 3.70  | 1.02  | -2.51E+00 | Neutral       | -2.51E+00 | Neutral       |
| 99  | p.Arg99Pro  | Likely pathogenic | 2397  | 11387 | 5.13  | 59.05 | -5.32E+01 | Deleterious   | -5.32E+01 | Deleterious   |
| 99  | p.Arg99Leu  |                   | 1736  | 369   | 3.72  | 1.91  | -2.60E+01 | Indeterminate | -2.60E+01 | Indeterminate |
| 99  | p.Arg99Asp  |                   | 1995  | 474   | 4.27  | 2.46  | -3.08E+01 | Indeterminate | -3.05E+01 | Indeterminate |
| 99  | p.Arg99Glu  |                   | 2272  | 392   | 4.87  | 2.03  | -1.05E+01 | Indeterminate | -1.05E+01 | Indeterminate |
| 99  | p.Arg99Ala  |                   | 2818  | 806   | 6.04  | 4.18  | -3.66E+01 | Indeterminate | -3.31E+01 | Indeterminate |
| 99  | p.Arg99Gly  |                   | 3322  | 420   | 2.18  | 2.18  | -1.22E+00 | Neutral       | -1.22E+00 | Neutral       |
| 99  | p.Arg99Val  | Neutral           | 1847  | 518   | 3.96  | 2.69  | -4.81E+01 | Indeterminate | -3.32E+01 | Indeterminate |
| 99  | p.Arg99Tyr  |                   | 2348  | 308   | 5.03  | 1.60  | -3.07E+00 | Neutral       | -3.07E+00 | Neutral       |
| 99  | p.Arg99Cys  |                   | 2310  | 505   | 4.95  | 2.62  | -2.17E+01 | Indeterminate | -2.17E+01 | Indeterminate |
| 99  | p.Arg99Trp  |                   | 2612  | 591   | 5.59  | 3.06  | -2.13E+01 | Indeterminate | -2.13E+01 | Indeterminate |
| 99  | p.Arg99Phe  |                   | 2255  | 318   | 4.83  | 1.65  | -4.69E+00 | Neutral       | -4.69E+00 | Neutral       |
| 100 | p.Ala100Asn |                   | 3418  | 332   | 2.33  | 1.28  | -1.08E+00 | Neutral       | -1.08E+00 | Neutral       |
| 100 | p.Ala100Lys |                   | 13759 | 1148  | 9.36  | 4.42  | -3.54E-04 | Neutral       | -3.54E-04 | Neutral       |
| 100 | p.Ala100Thr |                   | 5473  | 648   | 3.72  | 2.49  | -1.44E+00 | Neutral       | -1.44E+00 | Neutral       |
| 100 | p.Ala100Arg |                   | 14131 | 1152  | 9.61  | 4.43  | -1.87E-04 | Neutral       | -1.87E-04 | Neutral       |
| 100 | p.Ala100Ser | Likely benign     | 3813  | 249   | 2.59  | 0.96  | -8.77E-03 | Neutral       | -8.77E-03 | Neutral       |
| 100 | p.Ala100Ile |                   | 6693  | 620   | 4.55  | 2.38  | -8.43E-02 | Neutral       | -8.43E-02 | Neutral       |
| 100 | p.Ala100Met |                   | 14631 | 1686  | 9.95  | 6.49  | -5.02E-02 | Neutral       | -5.02E-02 | Neutral       |
| 100 | p.Ala100His |                   | 7412  | 516   | 5.04  | 1.98  | -5.68E-04 | Neutral       | -5.68E-04 | Neutral       |
| 100 | p.Ala100Gln |                   | 6694  | 604   | 4.55  | 2.32  | -6.09E-02 | Neutral       | -6.09E-02 | Neutral       |
| 100 | p.Ala100Pro | Deleterious       | 10531 | 12616 | 7.16  | 48.53 | -5.32E+01 | Deleterious   | -5.32E+01 | Deleterious   |
| 100 | p.Ala100Leu |                   | 6791  | 525   | 4.62  | 2.02  | -6.08E-03 | Neutral       | -6.08E-03 | Neutral       |
| 100 | p.Ala100Asp |                   | 1017  | 66    | 0.69  | 0.25  | -1.07E+00 | Neutral       | -1.07E+00 | Neutral       |
| 100 | p.Ala100Glu |                   | 7528  | 1165  | 5.12  | 4.48  | -3.66E+00 | Neutral       | -3.66E+00 | Neutral       |
| 100 | p.Ala100Ala | Synonymous        | 2608  | 231   | 1.77  | 0.89  | -1.06E+00 | Neutral       | -1.06E+00 | Neutral       |
| 100 | p.Ala100Gly |                   | 5224  | 1793  | 3.55  | 6.90  | -5.32E+01 | Deleterious   | -5.32E+01 | Deleterious   |
| 100 | p.Ala100Val |                   | 9737  | 705   | 6.62  | 2.71  | -2.07E-04 | Neutral       | -2.07E-04 | Neutral       |
| 100 | p.Ala100Tyr |                   | 3636  | 375   | 2.47  | 1.44  | -1.42E+00 | Neutral       | -1.42E+00 | Neutral       |
| 100 | p.Ala100Cys |                   | 4099  | 233   | 2.79  | 0.90  | -5.06E-04 | Neutral       | -5.06E-04 | Neutral       |
| 100 | p.Ala100Thr |                   | 15058 | 1024  | 10.24 | 3.94  | -2.12E+06 | Indeterminate | -2.12E+06 | Indeterminate |
| 100 | p.Ala100Phe |                   | 4733  | 309   | 3.22  | 1.19  | -2.66E-03 | Neutral       | -2.66E-03 | Neutral       |
| 101 | p.Gly101Asn |                   | 16195 | 7975  | 4.69  | 2.29  | -6.43E+00 | Indeterminate | -6.43E+00 | Indeterminate |
| 101 | p.Gly101Lys |                   | 18728 | 11869 | 5.42  | 3.41  | -1.36E+01 | Indeterminate | -1.36E+01 | Indeterminate |
| 101 | p.Gly101Thr |                   | 14607 | 10765 | 4.23  | 3.09  | -2.69E+01 | Indeterminate | -2.68E+01 | Indeterminate |
| 101 | p.Gly101Arg | Neutral           | 17888 | 10294 | 5.18  | 2.95  | -1.03E+01 | Indeterminate | -1.03E+01 | Indeterminate |
| 101 | p.Gly101Ser |                   | 20113 | 10885 | 5.82  | 3.12  | -7.05E+00 | Indeterminate | -7.05E+00 | Indeterminate |
| 101 | p.Gly101Ile |                   | 17140 | 56282 | 4.96  | 16.15 | -5.32E+01 | Deleterious   | -5.32E+01 | Deleterious   |
| 101 | p.Gly101Met |                   | 24756 | 17567 | 7.16  | 5.04  | -1.45E+01 | Indeterminate | -1.45E+01 | Indeterminate |
| 101 | p.Gly101His |                   | 12394 | 6745  | 3.59  | 1.94  | -1.30E+01 | Indeterminate | -1.30E+01 | Indeterminate |
| 101 | p.Gly101Gln |                   | 19989 | 10844 | 5.78  | 3.11  | -7.18E+00 | Indeterminate | -7.18E+00 | Indeterminate |
| 101 | p.Gly101Pro |                   | 13085 | 38084 | 3.79  | 10.93 | -5.32E+01 | Deleterious   | -5.32E+01 | Deleterious   |
| 101 | p.Gly101Leu |                   | 17138 | 20603 | 4.96  | 5.91  | -5.32E+01 | Deleterious   | -5.32E+01 | Deleterious   |
| 101 | p.Gly101Asp |                   | 16905 | 7563  | 4.89  | 2.17  | -3.90E+00 | Neutral       | -3.90E+00 | Neutral       |
| 101 | p.Gly101Glu |                   | 16990 | 10748 | 4.92  | 3.08  | -1.50E+01 | Indeterminate | -1.50E+01 | Indeterminate |
| 101 | p.Gly101Ala |                   | 14073 | 7741  | 4.07  | 2.22  | -1.17E+01 | Indeterminate | -1.17E+01 | Indeterminate |
| 101 | p.Gly101Gly | Synonymous        | 14598 | 4998  | 4.22  | 1.43  | -1.06E+00 | Neutral       | -1.06E+00 | Neutral       |
| 101 | p.Gly101Val |                   | 14907 | 44442 | 4.31  | 12.75 | -5.32E+01 | Deleterious   | -5.32E+01 | Deleterious   |
| 101 | p.Gly101Tyr |                   | 15482 | 13387 | 4.48  | 3.84  | -3.80E+01 | Indeterminate | -3.32E+01 | Indeterminate |
| 101 | p.Gly101Cys |                   | 26741 | 15085 | 7.74  | 4.33  | -5.64E+00 | Neutral       | -5.64E+00 | Neutral       |
| 101 | p.Gly101Trp | Pathogenic        | 21842 | 33554 | 6.32  | 9.63  | -5.32E+01 | Deleterious   | -5.32E+01 | Deleterious   |
| 101 | p.Gly101Phe |                   | 12038 | 9008  | 3.48  | 2.59  | -3.28E+01 | Indeterminate | -3.20E+01 | Indeterminate |
| 102 | p.Ala102Asn |                   | 1416  | 161   | 0.51  | 0.23  | -5.32E+01 | Deleterious   | -5.32E+01 | Deleterious   |
| 102 | p.Ala102Lys |                   | 25422 | 7632  | 9.21  | 10.79 | -5.32E+01 | Deleterious   | -5.32E+01 | Deleterious   |
| 102 | p.Ala102Thr |                   | 90    | 11    | 0.03  | 0.02  | -5.32E+01 | Deleterious   | -5.32E+01 | Deleterious   |
| 102 | p.Ala102Arg |                   | 16482 | 8234  | 5.97  | 11.65 | -5.32E+01 | Deleterious   | -5.32E+01 | Deleterious   |
| 102 | p.Ala102Ser |                   | 6001  | 154   | 2.17  | 0.22  | -5.32E+01 | Deleterious   | -5.32E+01 | Deleterious   |
| 102 | p.Ala102Ile |                   | 14717 | 2928  | 5.33  | 4.14  | -5.32E+01 | Deleterious   | -5.32E+01 | Deleterious   |
| 102 | p.Ala102Met |                   | 12041 | 3575  | 4.36  | 5.06  | -5.32E+01 | Deleterious   | -5.32E+01 | Deleterious   |
| 102 | p.Ala102His |                   | 10705 | 2037  | 3.88  | 2.88  | -5.32E+01 | Deleterious   | -5.32E+01 | Deleterious   |
| 102 | p.Ala102Gln |                   | 20898 | 5855  | 7.57  | 8.28  | -5.32E+01 | Deleterious   | -5.32E+01 | Deleterious   |
| 102 | p.Ala102Pro |                   | 1015  | 355   | 0.37  | 0.47  | -5.32E+01 | Deleterious   | -5.32E+01 | Deleterious   |
| 102 | p.Ala102Leu |                   | 19464 | 8187  | 7.05  | 11.58 | -5.32E+01 | Deleterious   | -5.32E+01 | Deleterious   |
| 102 | p.Ala102Asp |                   | 15694 | 4695  | 5.69  | 6.64  | -5.32E+01 | Deleterious   | -5.32E+01 | Deleterious   |
| 102 | p.Ala102Glu |                   | 22596 | 8973  | 8.19  | 12.69 | -5.32E+01 | Deleterious   | -5.32E+01 | Deleterious   |
| 102 | p.Ala102Ala | Synonymous        | 17069 | 184   | 6.18  | 0.26  | -1.06E+00 | Neutral       | -1.06E+00 | Neutral       |
| 102 | p.Ala102Gly |                   | 8592  | 52    | 3.11  | 0.07  | -2.94E-02 | Neutral       | -2.94E-02 | Neutral       |
| 102 | p.Ala102Val |                   | 31839 | 787   | 11.54 | 1.11  | -1.80E+01 | Indeterminate | -1.80E+01 | Indeterminate |
| 102 | p.Ala102Tyr |                   | 7303  | 3519  | 2.65  | 4.98  | -5.32E+01 | Deleterious   | -5.32E+01 | Deleterious   |
| 102 | p.Ala102Cys |                   | 9054  | 131   | 3.28  | 0.19  | -1.24E+01 | Indeterminate | -1.24E+01 | Indeterminate |
| 102 | p.Ala102Trp |                   | 27880 | 10063 | 10.10 | 14.23 | -5.32E+01 | Deleterious   | -5.32E+01 | Deleterious   |
| 102 | p.Ala102Phe |                   | 7718  | 3189  | 2.80  | 4.51  | -5.32E+01 | Deleterious   | -5.32E+01 | Deleterious   |
| 103 | p.Arg103Asn |                   | 6943  | 7127  | 8.93  | 8.95  | -1.36E-02 | Neutral       | -1.36E-02 | Neutral       |
| 103 | p.Arg103Lys |                   | 3330  | 3626  | 4.28  | 4.55  | -4.82E-01 | Neutral       | -4.82E-01 | Neutral       |
| 103 | p.Arg103Thr |                   | 3053  | 4907  | 3.93  | 6.16  | -6.16E+00 | Indeterminate | -6.16E+00 | Indeterminate |
| 103 | p.Arg103Arg | Synonymous        | 2349  | 2516  | 3.02  | 3.16  | -1.06E+00 | Neutral       | -1.06E+00 | Neutral       |
| 103 | p.Arg103Ser |                   | 2005  | 1352  | 2.58  | 1.70  | -1.21E-02 | Neutral       | -1.21E-02 | Neutral       |
| 103 | p.Arg103Ile |                   | 3142  | 4421  | 4.04  | 5.55  | -3.14E+00 | Neutral       | -3.14E+00 | Neutral       |
| 103 | p.Arg103Met |                   | 1311  | 1440  | 1.69  | 1.81  | -3.90E+00 | Neutral       | -3.90E+00 | Neutral       |
| 103 | p.Arg103His |                   | 1356  | 1198  | 1.74  | 1.50  | -9.86E-01 | Neutral       | -9.86E-01 | Neutral       |
| 103 | p.Arg103Gln |                   | 2359  | 2500  | 3.03  | 3.14  | -9.72E-01 | Neutral       | -9.72E-01 | Neutral       |
| 103 | p.Arg103Pro |                   | 1548  | 1348  | 1.99  | 1.69  | -6.26E-01 | Neutral       | -6.26E-01 | Neutral       |
| 103 | p.Arg103Leu |                   | 2506  | 1742  | 3.22  | 2.19  | -6.08E-03 | Neutral       | -6.08E-03 | Neutral       |
| 103 | p.Arg103Asp |                   | 5113  | 4011  | 6.58  | 5.03  | -7.98E-04 | Neutral       | -7.98E-04 | Neutral       |
| 103 | p.Arg103Glu |                   | 753   | 642   | 0.97  | 0.81  | -2.72E+00 | Neutral       | -2.72E+00 | Neutral       |
| 103 | p.Arg103Ala |                   | 6092  | 5272  | 7.83  | 6.62  | -1.66E-03 | Neutral       | -1.66E-03 | Neutral       |
| 103 | p.Arg103Gly |                   | 7131  | 7369  | 9.17  | 9.25  | -1.32E-02 | Neutral       | -1.32E-02 | Neutral       |
| 103 | p.Arg103Val |                   | 2730  | 2488  | 3.51  | 3.12  | -1.62E-01 | Neutral       | -1.62E-01 | Neutral       |
| 103 | p.Arg103Tyr |                   | 3731  | 4354  | 4.80  | 5.47  | -6.30E-01 | Neutral       | -6.30E-01 | Neutral       |
| 103 | p.Arg103Cys |                   | 10170 | 11475 | 13.08 | 14.40 | -8.28E-03 | Neutral       | -8.28E-03 | Neutral       |
| 103 | p.Arg103Trp |                   | 2854  | 2738  | 3.67  | 3.44  | -2.37E-01 | Neutral       | -2.37E-01 | Neutral       |
| 103 | p.Arg103Phe |                   | 9286  |       |       |       |           |               |           |               |

|     |             |       |      |      |       |      |      |           |               |           |               |           |               |           |               |
|-----|-------------|-------|------|------|-------|------|------|-----------|---------------|-----------|---------------|-----------|---------------|-----------|---------------|
| 104 | p.Leu104Phe | 5907  | 407  | 6.29 | 0.78  |      |      |           | 0.00E+00      | Neutral   |               | 0.00E+00  | Neutral       |           |               |
| 105 | p.Asp105Asn | 2615  | 618  | 3.97 | 2.03  |      |      | -2.86E+00 | Neutral       |           |               | -2.86E+00 | Neutral       |           |               |
| 105 | p.Asp105Lys | 4759  | 2093 | 7.22 | 6.86  |      |      | -1.59E+01 | Indeterminate |           |               | -1.59E+01 | Indeterminate |           |               |
| 105 | p.Asp105Thr | 2587  | 857  | 3.92 | 2.81  |      |      | -1.22E+01 | Indeterminate |           |               | -1.22E+01 | Indeterminate |           |               |
| 105 | p.Asp105Arg | 4066  | 2281 | 6.17 | 7.48  |      |      | -3.54E+01 | Indeterminate |           |               | -3.29E+01 | Indeterminate |           |               |
| 105 | p.Asp105Ser | 985   | 469  | 1.49 | 1.54  |      |      | -5.32E+01 | Deleterious   |           |               | -5.32E+01 | Deleterious   |           |               |
| 105 | p.Asp105Ile | 2485  | 1504 | 3.77 | 4.93  |      |      | -5.32E+01 | Deleterious   |           |               | -5.32E+01 | Deleterious   |           |               |
| 105 | p.Asp105Met | 2222  | 756  | 3.37 | 2.48  |      |      | -1.57E+01 | Indeterminate |           |               | -1.57E+01 | Indeterminate |           |               |
| 105 | p.Asp105His | 3979  | 1502 | 6.04 | 4.92  |      |      | -1.17E+01 | Indeterminate |           |               | -1.17E+01 | Indeterminate |           |               |
| 105 | p.Asp105Gln | 3702  | 1586 | 5.62 | 5.20  |      |      | -1.89E+01 | Indeterminate |           |               | -1.89E+01 | Indeterminate |           |               |
| 105 | p.Asp105Pro | 2531  | 5497 | 3.84 | 18.01 |      |      | -5.32E+01 | Deleterious   |           |               | -5.32E+01 | Deleterious   |           |               |
| 105 | p.Asp105Leu | 3705  | 1568 | 5.62 | 5.14  |      |      | -1.82E+01 | Indeterminate |           |               | -1.82E+01 | Indeterminate |           |               |
| 105 | p.Asp105Asp | 3838  | 879  | 5.82 | 2.88  |      |      | -1.06E+00 | Neutral       |           |               | -1.06E+00 | Neutral       |           |               |
| 105 | p.Asp105Glu | 5734  | 2764 | 8.70 | 9.06  |      |      | -1.74E+01 | Indeterminate |           |               | -1.74E+01 | Indeterminate |           |               |
| 105 | p.Asp105Ala | 4005  | 1276 | 6.08 | 4.18  |      |      | -6.08E+00 | Indeterminate |           |               | -6.08E+00 | Indeterminate |           |               |
| 105 | p.Asp105Gly | 1562  | 963  | 2.37 | 3.16  |      |      | -5.32E+01 | Deleterious   |           |               | -5.32E+01 | Deleterious   |           |               |
| 105 | p.Asp105Val | 4690  | 2554 | 7.11 | 8.37  |      |      | -2.92E+01 | Indeterminate |           |               | -2.92E+01 | Indeterminate |           |               |
| 105 | p.Asp105Tyr | 3757  | 461  | 5.70 | 1.51  |      |      | -3.22E-04 | Neutral       |           |               | -3.22E-04 | Neutral       |           |               |
| 105 | p.Asp105Cys | 1256  | 166  | 1.91 | 0.54  |      |      | -2.28E-01 | Neutral       |           |               | -2.28E-01 | Neutral       |           |               |
| 105 | p.Asp105Trp | 3585  | 1128 | 5.44 | 3.70  |      |      | -6.73E+00 | Indeterminate |           |               | -6.73E+00 | Indeterminate |           |               |
| 105 | p.Asp105Phe | 3861  | 1593 | 5.86 | 5.22  |      |      | -1.61E+01 | Indeterminate |           |               | -1.61E+01 | Indeterminate |           |               |
| 106 | p.Val106Asn | 1125  | 3424 | 4.79 | 5.65  | 5445 | 1988 | 4.36      | 4.81          | -0.77E+00 | Indeterminate | -4.25E+00 | Neutral       | -8.17E+00 | Indeterminate |
| 106 | p.Val106Lys | 1023  | 4025 | 4.36 | 6.64  | 7514 | 2575 | 6.02      | 6.23          | -1.90E+01 | Indeterminate | -1.66E+00 | Neutral       | -1.67E+01 | Indeterminate |
| 106 | p.Val106Thr | 979   | 2138 | 4.17 | 3.53  | 5546 | 1736 | 4.44      | 4.20          | -1.66E+00 | Neutral       | -1.77E+00 | Neutral       | -1.68E+00 | Neutral       |
| 106 | p.Val106Arg | 641   | 2444 | 2.73 | 4.03  | 3991 | 1125 | 3.20      | 2.72          | -2.67E+01 | Indeterminate | -1.82E+00 | Neutral       | -2.41E+01 | Indeterminate |
| 106 | p.Val106Ser | 1510  | 3703 | 6.44 | 6.11  | 7597 | 2262 | 6.08      | 5.47          | -1.39E+00 | Neutral       | -5.78E-01 | Neutral       | -7.25E-01 | Neutral       |
| 106 | p.Val106Ile | 1265  | 1935 | 5.39 | 3.19  | 6656 | 2352 | 5.33      | 5.69          | -2.05E-02 | Neutral       | -2.54E+00 | Neutral       | -1.09E+00 | Neutral       |
| 106 | p.Val106Met | 1360  | 3085 | 5.80 | 5.09  | 7476 | 2399 | 5.99      | 5.80          | -1.03E+00 | Neutral       | -1.08E+00 | Neutral       | -8.05E-01 | Neutral       |
| 106 | p.Val106His | 1415  | 3084 | 6.03 | 5.09  | 7083 | 2284 | 5.67      | 5.52          | -6.83E-01 | Neutral       | -1.26E+00 | Neutral       | -7.14E-01 | Neutral       |
| 106 | p.Val106Gln | 1752  | 2941 | 7.47 | 4.85  | 6941 | 2628 | 5.56      | 6.35          | -1.64E-02 | Neutral       | -3.41E+00 | Neutral       | -1.67E+00 | Neutral       |
| 106 | p.Val106Pro | 827   | 3185 | 3.52 | 5.26  | 4716 | 1641 | 3.78      | 3.97          | -2.18E+01 | Indeterminate | -4.24E+00 | Neutral       | -2.18E+01 | Indeterminate |
| 106 | p.Val106Leu | 633   | 1732 | 2.70 | 2.86  | 4193 | 1337 | 3.36      | 3.23          | -9.78E+00 | Indeterminate | -3.33E+00 | Neutral       | -9.78E+00 | Indeterminate |
| 106 | p.Val106Asp | 1686  | 3754 | 7.19 | 6.19  | 7863 | 2900 | 6.30      | 7.01          | -5.03E-01 | Neutral       | -2.36E+00 | Neutral       | -1.29E+00 | Neutral       |
| 106 | p.Val106Glu | 517   | 1854 | 2.20 | 3.06  | 2857 | 932  | 2.29      | 2.25          | -2.74E+01 | Indeterminate | -6.67E+00 | Indeterminate | -2.94E+01 | Indeterminate |
| 106 | p.Val106Ala | 1537  | 5106 | 6.55 | 8.43  | 7541 | 2613 | 6.04      | 6.32          | -6.62E+00 | Indeterminate | -1.77E+00 | Neutral       | -5.62E+00 | Neutral       |
| 106 | p.Val106Gly | 1091  | 3822 | 4.65 | 6.20  | 7234 | 2084 | 5.79      | 5.04          | -1.24E+01 | Indeterminate | -5.01E-01 | Neutral       | -9.59E-02 | Neutral       |
| 106 | p.Val106Val | 1338  | 3033 | 5.70 | 5.00  | 6396 | 1945 | 5.12      | 4.70          | -1.06E+00 | Neutral       | -1.06E+00 | Neutral       | -8.18E-01 | Neutral       |
| 106 | p.Val106Tyr | 1292  | 2558 | 5.51 | 4.22  | 5942 | 2069 | 4.76      | 5.00          | -3.88E-01 | Neutral       | -2.88E+00 | Neutral       | -1.56E+00 | Neutral       |
| 106 | p.Val106Cys | 1632  | 4660 | 6.96 | 7.69  | 9313 | 2868 | 7.46      | 6.93          | -2.96E+00 | Neutral       | -4.31E-01 | Neutral       | -1.64E+00 | Neutral       |
| 106 | p.Val106Trp | 338   | 818  | 1.44 | 1.35  | 2610 | 734  | 2.09      | 1.77          | -1.32E+01 | Indeterminate | -3.91E+00 | Neutral       | -1.34E+01 | Indeterminate |
| 106 | p.Val106Phe | 1504  | 3293 | 6.41 | 5.43  | 7973 | 2886 | 6.38      | 6.98          | -6.01E-01 | Neutral       | -2.06E+00 | Neutral       | -1.15E+00 | Neutral       |
| 107 | p.Arg107Asn | 4635  | 525  | 4.04 | 4.09  | 1667 | 4330 | 4.10      | 4.93          | -1.50E+00 | Neutral       | -3.32E+00 | Neutral       | -2.70E+00 | Neutral       |
| 107 | p.Arg107Lys | 4356  | 469  | 3.80 | 3.63  | 1642 | 3493 | 4.04      | 3.98          | -1.23E+00 | Neutral       | -1.00E+00 | Neutral       | -8.83E-01 | Neutral       |
| 107 | p.Arg107Thr | 7105  | 785  | 6.19 | 6.11  | 2387 | 4172 | 5.87      | 4.75          | -4.16E-01 | Neutral       | -3.90E-02 | Neutral       | -5.96E-02 | Neutral       |
| 107 | p.Arg107Arg | 6674  | 811  | 5.82 | 6.31  | 2006 | 4597 | 4.94      | 5.24          | -1.06E+00 | Neutral       | -1.06E+00 | Neutral       | -8.18E-01 | Neutral       |
| 107 | p.Arg107Ser | 5046  | 684  | 4.40 | 5.32  | 1875 | 4722 | 4.61      | 5.38          | -3.59E+00 | Neutral       | -2.26E+00 | Neutral       | -3.51E+00 | Neutral       |
| 107 | p.Arg107Ile | 3528  | 390  | 3.08 | 3.04  | 1126 | 1863 | 2.77      | 2.12          | -2.26E+00 | Neutral       | -3.53E-01 | Neutral       | -1.12E+00 | Neutral       |
| 107 | p.Arg107Met | 7376  | 804  | 6.43 | 6.26  | 2724 | 5759 | 6.70      | 6.56          | -3.28E-01 | Neutral       | -2.20E-01 | Neutral       | -8.34E-02 | Neutral       |
| 107 | p.Arg107His | 4098  | 438  | 3.57 | 3.41  | 1418 | 3207 | 3.49      | 3.65          | -1.34E+00 | Neutral       | -2.07E+00 | Neutral       | -1.66E+00 | Neutral       |
| 107 | p.Arg107Gln | 10107 | 1081 | 8.81 | 8.41  | 4069 | 7524 | 10.01     | 8.57          | -8.71E-02 | Neutral       | -6.53E-03 | Neutral       | -2.91E-03 | Neutral       |
| 107 | p.Arg107Pro | 6819  | 747  | 5.94 | 5.21  | 2662 | 5187 | 6.55      | 5.91          | -4.38E-01 | Neutral       | -9.73E-02 | Neutral       | -7.95E-02 | Neutral       |
| 107 | p.Arg107Leu | 6193  | 712  | 5.40 | 5.54  | 2041 | 5611 | 5.02      | 6.39          | -8.46E-01 | Neutral       | -3.14E+00 | Neutral       | -2.08E+00 | Neutral       |
| 107 | p.Arg107Asp | 3847  | 431  | 3.35 | 3.35  | 1546 | 3341 | 3.80      | 3.81          | -2.07E+00 | Neutral       | -1.29E+00 | Neutral       | -1.62E+00 | Neutral       |
| 107 | p.Arg107Glu | 3892  | 481  | 3.39 | 3.74  | 1098 | 2698 | 2.70      | 3.07          | -3.48E+00 | Neutral       | -4.97E+00 | Neutral       | -5.67E+00 | Neutral       |
| 107 | p.Arg107Ala | 8763  | 943  | 7.64 | 7.34  | 3149 | 6188 | 7.75      | 7.05          | -1.61E-01 | Neutral       | -5.43E-02 | Neutral       | -1.46E-02 | Neutral       |
| 107 | p.Arg107Gly | 5027  | 563  | 4.38 | 4.38  | 1622 | 3862 | 3.99      | 4.40          | -1.16E+00 | Neutral       | -2.16E+00 | Neutral       | -1.60E+00 | Neutral       |
| 107 | p.Arg107Val | 7473  | 764  | 6.51 | 5.95  | 2752 | 6282 | 6.77      | 7.16          | -1.64E-01 | Neutral       | -4.44E-01 | Neutral       | -1.00E-01 | Neutral       |
| 107 | p.Arg107Tyr | 3383  | 660  | 4.69 | 5.14  | 1758 | 3648 | 4.33      | 4.16          | -1.82E+00 | Neutral       | -6.97E-01 | Neutral       | -1.06E+00 | Neutral       |
| 107 | p.Arg107Cys | 2751  | 240  | 1.06 | 2.05  | 1066 | 3094 | 2.62      | 3.52          | -1.58E+00 | Neutral       | -1.01E+01 | Indeterminate | -8.51E+00 | Indeterminate |
| 107 | p.Arg107Trp | 6378  | 683  | 5.56 | 5.32  | 2287 | 4275 | 5.63      | 4.87          | -4.34E-01 | Neutral       | -1.08E-01 | Neutral       | -8.19E-02 | Neutral       |
| 107 | p.Arg107Phe | 5273  | 613  | 4.60 | 4.77  | 1737 | 3940 | 4.27      | 4.49          | -1.35E+00 | Neutral       | -1.38E+00 | Neutral       | -1.19E+00 | Neutral       |
| 108 | p.Asp108Asn | 2885  | 264  | 5.26 | 1.09  |      |      |           |               | -7.77E-01 | Neutral       |           |               | -7.77E-01 | Neutral       |
| 108 | p.Asp108Lys | 2742  | 1549 | 5.00 | 6.37  |      |      |           |               | -5.32E+01 | Deleterious   |           |               | -5.32E+01 | Deleterious   |
| 108 | p.Asp108Thr | 3646  | 860  | 6.65 | 3.54  |      |      |           |               | -3.14E+01 | Indeterminate |           |               | -3.10E+01 | Indeterminate |
| 108 | p.Asp108Arg | 3490  | 2166 | 6.36 | 8.91  |      |      |           |               | -5.32E+01 | Deleterious   |           |               | -5.32E+01 | Deleterious   |
| 108 | p.Asp108Ser | 4074  | 1584 | 7.43 | 6.52  |      |      |           |               | -5.32E+01 | Deleterious   |           |               | -5.32E+01 | Deleterious   |
| 108 | p.Asp108Ile | 3055  | 1607 | 5.27 | 6.61  |      |      |           |               | -5.32E+01 | Deleterious   |           |               | -5.32E+01 | Deleterious   |
| 108 | p.Asp108Met | 3341  | 1731 | 6.09 | 7.12  |      |      |           |               | -5.32E+01 | Deleterious   |           |               | -5.32E+01 | Deleterious   |
| 108 | p.Asp108His | 1882  | 1059 | 3.43 | 4.36  |      |      |           |               | -5.32E+01 | Deleterious   |           |               | -5.32E+01 | Deleterious   |
| 108 | p.Asp108Gln | 2051  | 1059 | 3.74 | 4.36  |      |      |           |               | -5.32E+01 | Deleterious   |           |               | -5.32E+01 | Deleterious   |
| 108 | p.Asp108Pro | 2292  | 1346 | 4.18 | 5.54  |      |      |           |               | -5.32E+01 | Deleterious   |           |               | -5.32E+01 | Deleterious   |
| 108 | p.Asp108Leu | 1845  | 1018 | 3.36 | 4.19  |      |      |           |               | -5.32E+01 | Deleterious   |           |               | -5.32E+01 | Deleterious   |
| 108 | p.Asp108Asp | 2828  | 268  | 5.16 | 1.10  |      |      |           |               | -1.06E+00 | Neutral       |           |               | -1.06E+00 | Neutral       |
| 108 | p.Asp108Glu | 1895  | 256  | 3.46 | 1.05  |      |      |           |               | -1.17E+01 | Indeterminate |           |               | -1.17E+01 | Indeterminate |
| 108 | p.Asp108Ala | 1228  | 713  | 2.24 | 2.93  |      |      |           |               | -5.32E+01 | Deleterious   |           |               | -5.32E+01 | Deleterious   |
| 108 | p.Asp108Gly | 2077  | 1202 | 3.79 | 4.95  |      |      |           |               | -5.32E+01 | Deleterious   |           |               | -5.32E+01 | Deleterious   |
| 108 | p.Asp108Val | 2618  | 1408 | 4.77 | 5.79  |      |      |           |               | -5.32E+01 | Deleterious   |           |               | -5.32E+01 | Deleterious   |
| 108 | p.Asp108Tyr | 3107  | 1750 | 5.67 | 7.20  |      |      |           |               | -5.32E+01 | Deleterious   |           |               | -5.32E+01 | Deleterious   |
| 108 | p.Asp108Cys | 3596  | 1073 | 6.56 | 4.42  |      |      |           |               | -5.32E+01 | Deleterious   |           |               | -5.32E+01 | Deleterious   |
| 108 | p.Asp108Trp | 2630  | 1506 | 4.80 | 6.20  |      |      |           |               | -5.32E+01 | Deleterious   |           |               | -5.32E+01 | Deleterious   |
| 108 | p.Asp108Phe | 3562  | 1880 | 6.49 | 7.74  |      |      |           |               | -5.32E+01 | Deleterious   |           |               | -5.32E+01 | Deleterious   |
| 109 | p.Ala109Asn | 5087  | 2168 | 5.92 | 3.29  | 2356 | 497  | 5.70      | 3.39          | -5.43E-02 | Neutral       | -6.55E-05 | Neutral       | -1.00E-03 | Neutral       |
| 109 | p.Ala109Lys | 4243  | 2332 | 4.94 | 3.54  | 2242 | 926  | 5.42      | 6.32          | -1.15E+00 | Neutral       |           | Neutral       | -8.41E-01 | Neutral       |
| 109 | p.Ala109Thr | 3577  | 1765 | 4.16 | 2.68  | 1732 | 348  | 4.19      | 2.38          | -1.87E-01 | Neutral       | -1.98E-04 | Neutral       | -1.59E-01 | Neutral       |
| 109 | p.Ala109Arg | 4277  | 1773 | 4.98 | 2.69  | 2178 | 929  | 5.27      | 6.35          | -7.90E-02 | Neutral       | -1.36E+00 | Neutral       | -4.40E-01 | Neutral       |
| 109 | p.Ala109Ser | 5242  | 1956 | 6.10 | 2.97  | 2496 | 754  | 6.03      | 5.15          | -6.86E-03 | Neutral       | -2.73E-02 | Neutral       | -3.97E-04 | Neutral       |
| 109 | p.Ala109Ile | 2094  | 593  | 2.44 | 0.90  | 1056 | 155  | 2.55      | 1.06          | -1.08E-02 | Neutral       | -7.81E-06 | Neutral       | -4.05E-05 | Neutral       |
| 109 | p.Ala109Met | 4264  | 1398 | 4.96 | 2.12  | 2308 | 561  | 5.58      | 3.83          | -2.48E-03 | Neutral       | -1.24E-03 | Neutral       | -4.77E-06 | Neutral       |
| 109 | p.Ala109His | 4833  | 1775 | 5.62 | 2.70  | 2328 | 605  | 5.63      | 4.13          | -8.20E-03 | Neutral       | -3.81E-03 | Neutral       | -4.97E-05 | Neutral       |
| 109 | p.Ala109Gln | 3927  | 1804 | 4.57 | 2.74  | 1861 | 497  | 4.50      | 3.39          | -3.26E-01 | Neutral       | -1.89E-02 | Neutral       | -3.56E-02 | Neutral       |
| 109 | p.Ala109Pro | 4529  |      |      |       |      |      |           |               |           |               |           |               |           |               |

|     |             |                   |       |       |       |       |       |      |      |      |           |               |           |               |           |               |
|-----|-------------|-------------------|-------|-------|-------|-------|-------|------|------|------|-----------|---------------|-----------|---------------|-----------|---------------|
| 110 | p.Gly111Trp |                   | 784   | 2880  | 6.35  | 2.95  |       |      |      |      | -5.35E-01 | Neutral       |           |               | -5.35E-01 | Neutral       |
| 111 | p.Gly111Phe |                   | 6259  | 2098  | 5.06  | 2.15  |       |      |      |      | -4.69E-01 | Neutral       |           |               | -4.69E-01 | Neutral       |
| 112 | p.Arg112Asn |                   | 1991  | 616   | 5.55  | 1.56  |       |      |      |      | -2.08E-01 | Neutral       |           |               | -2.08E-01 | Neutral       |
| 112 | p.Arg112Lys |                   | 1846  | 746   | 5.14  | 1.89  |       |      |      |      | -2.10E+00 | Neutral       |           |               | -2.10E+00 | Neutral       |
| 112 | p.Arg112Thr |                   | 1776  | 536   | 4.95  | 1.36  |       |      |      |      | -2.38E-01 | Neutral       |           |               | -2.38E-01 | Neutral       |
| 112 | p.Arg112Arg | Synonymous        | 1452  | 488   | 4.05  | 1.24  |       |      |      |      | -1.06E+00 | Neutral       |           |               | -1.06E+00 | Neutral       |
| 112 | p.Arg112Ser |                   | 1978  | 644   | 5.51  | 1.63  |       |      |      |      | -3.51E-01 | Neutral       |           |               | -3.51E-01 | Neutral       |
| 112 | p.Arg112Ile |                   | 2053  | 798   | 5.72  | 2.02  |       |      |      |      | -1.31E+00 | Neutral       |           |               | -1.31E+00 | Neutral       |
| 112 | p.Arg112Met |                   | 1638  | 361   | 4.56  | 0.91  |       |      |      |      | -5.32E-03 | Neutral       |           |               | -5.32E-03 | Neutral       |
| 112 | p.Arg112His |                   | 2167  | 850   | 6.04  | 2.15  |       |      |      |      | -1.24E+00 | Neutral       |           |               | -1.24E+00 | Neutral       |
| 112 | p.Arg112Gln |                   | 2010  | 873   | 5.60  | 2.21  |       |      |      |      | -2.70E+00 | Neutral       |           |               | -2.70E+00 | Neutral       |
| 112 | p.Arg112Pro |                   | 1820  | 24747 | 5.07  | 62.68 |       |      |      |      | -5.32E-01 | Deleterious   |           |               | -5.32E-01 | Deleterious   |
| 112 | p.Arg112Leu |                   | 1796  | 1126  | 5.00  | 2.85  |       |      |      |      | -1.45E+01 | Indeterminate |           |               | -1.45E+01 | Indeterminate |
| 112 | p.Arg112Asp |                   | 1639  | 814   | 4.57  | 2.06  |       |      |      |      | -7.02E+00 | Indeterminate |           |               | -7.02E+00 | Indeterminate |
| 112 | p.Arg112Glu |                   | 1519  | 919   | 4.23  | 2.33  |       |      |      |      | -1.55E+01 | Indeterminate |           |               | -1.55E+01 | Indeterminate |
| 112 | p.Arg112Ala |                   | 1691  | 765   | 4.71  | 1.94  |       |      |      |      | -4.46E+00 | Neutral       |           |               | -4.46E+00 | Neutral       |
| 112 | p.Arg112Val | Pathogenic        | 1652  | 1294  | 5.22  | 4.60  |       |      |      |      | -2.95E+00 | Indeterminate |           |               | -2.94E+00 | Indeterminate |
| 112 | p.Arg112Val |                   | 1610  | 761   | 4.49  | 1.93  |       |      |      |      | -5.85E+00 | Indeterminate |           |               | -5.85E+00 | Indeterminate |
| 112 | p.Arg112Tyr |                   | 2411  | 944   | 6.72  | 2.39  |       |      |      |      | -9.47E-01 | Neutral       |           |               | -9.47E-01 | Neutral       |
| 112 | p.Arg112Cys |                   | 1023  | 549   | 2.85  | 1.39  |       |      |      |      | -1.60E+01 | Indeterminate |           |               | -1.60E+01 | Indeterminate |
| 112 | p.Arg112Trp |                   | 1893  | 729   | 5.27  | 1.85  |       |      |      |      | -1.48E+00 | Neutral       |           |               | -1.48E+00 | Neutral       |
| 112 | p.Arg112Phe |                   | 1931  | 923   | 5.38  | 2.34  |       |      |      |      | -4.69E+00 | Neutral       |           |               | -4.69E+00 | Neutral       |
| 113 | p.Leu113Asn |                   | 1379  | 2633  | 3.76  | 3.88  | 4836  | 1048 | 3.79 | 4.54 | -5.05E+00 | Neutral       | -6.01E+00 | Neutral       | -7.95E+00 | Indeterminate |
| 113 | p.Leu113Lys |                   | 5008  | 4687  | 7.00  | 6.90  | 9167  | 1337 | 7.19 | 5.79 | -1.25E+00 | Neutral       | -6.04E-02 | Neutral       | -3.79E-01 | Neutral       |
| 113 | p.Leu113Met |                   | 7489  | 4108  | 5.24  | 6.02  | 7289  | 1294 | 5.72 | 5.61 | -5.15E+00 | Neutral       | -9.00E-01 | Neutral       | -3.67E-01 | Neutral       |
| 113 | p.Leu113Arg |                   | 5302  | 2864  | 3.71  | 4.22  | 5345  | 800  | 4.19 | 3.47 | -7.81E+00 | Indeterminate | -5.23E-01 | Neutral       | -5.57E+00 | Neutral       |
| 113 | p.Leu113Ser |                   | 9675  | 4603  | 6.77  | 6.78  | 9003  | 1272 | 7.06 | 5.51 | -1.50E+00 | Neutral       | -4.32E-02 | Neutral       | -4.94E-01 | Neutral       |
| 113 | p.Leu113Ile |                   | 7432  | 3761  | 5.20  | 5.54  | 6762  | 832  | 5.31 | 3.61 | -3.54E+00 | Neutral       | -2.39E-02 | Neutral       | -1.77E+00 | Neutral       |
| 113 | p.Leu113Met |                   | 7071  | 2518  | 4.95  | 3.71  | 5559  | 1368 | 4.36 | 5.93 | -3.49E-01 | Neutral       | -8.34E+00 | Indeterminate | -5.88E+00 | Indeterminate |
| 113 | p.Leu113His |                   | 5034  | 2915  | 3.52  | 4.29  | 4779  | 1071 | 3.75 | 4.64 | -1.08E+01 | Indeterminate | -7.03E+00 | Indeterminate | -1.41E+01 | Indeterminate |
| 113 | p.Leu113Gln |                   | 6683  | 3104  | 4.67  | 4.57  | 6294  | 360  | 4.94 | 1.56 | -2.72E+00 | Neutral       | -2.58E-09 | Neutral       | -1.19E+00 | Neutral       |
| 113 | p.Leu113Pro |                   | 2367  | 1619  | 1.66  | 2.38  | 2507  | 642  | 1.97 | 2.78 | -3.57E-01 | Indeterminate | -2.24E+01 | Indeterminate | -5.32E+01 | Deleterious   |
| 113 | p.Leu113Leu | Synonymous        | 18768 | 3839  | 6.13  | 5.65  | 17778 | 1443 | 6.10 | 6.25 | -1.06E+00 | Neutral       | -1.06E+00 | Neutral       | -8.18E-01 | Neutral       |
| 113 | p.Leu113Asp |                   | 8948  | 4600  | 6.26  | 6.78  | 8096  | 1453 | 6.35 | 6.30 | -2.78E+00 | Neutral       | -7.48E-01 | Neutral       | -1.75E+00 | Neutral       |
| 113 | p.Leu113Glu |                   | 9912  | 4090  | 6.93  | 6.02  | 7870  | 1492 | 6.18 | 6.46 | -4.80E-01 | Neutral       | -1.20E+00 | Neutral       | -5.68E-01 | Neutral       |
| 113 | p.Leu113Ala |                   | 4998  | 2415  | 3.50  | 3.56  | 4479  | 1363 | 3.51 | 5.91 | -5.32E+00 | Neutral       | -2.11E+01 | Indeterminate | -2.22E+01 | Indeterminate |
| 113 | p.Leu113Gly |                   | 8660  | 4353  | 6.06  | 6.41  | 7215  | 1802 | 5.66 | 7.81 | -2.61E+00 | Neutral       | -6.25E+00 | Neutral       | -6.02E+00 | Indeterminate |
| 113 | p.Leu113Val |                   | 10162 | 4313  | 7.11  | 6.35  | 9204  | 1432 | 7.22 | 6.20 | -5.69E-01 | Neutral       | -1.29E-01 | Neutral       | -1.29E-01 | Neutral       |
| 113 | p.Leu113Tyr |                   | 4520  | 2034  | 3.16  | 3.00  | 3746  | 470  | 2.94 | 2.04 | -4.48E+00 | Neutral       | -3.07E-01 | Neutral       | -2.67E+00 | Neutral       |
| 113 | p.Leu113Cys |                   | 7692  | 3300  | 5.38  | 4.86  | 6668  | 1154 | 5.23 | 5.00 | -1.25E+00 | Neutral       | -9.28E-01 | Neutral       | -8.50E-01 | Neutral       |
| 113 | p.Leu113Trp |                   | 8114  | 3571  | 5.67  | 5.26  | 6388  | 1407 | 5.01 | 6.10 | -1.32E+00 | Neutral       | -4.26E+00 | Neutral       | -3.29E+00 | Neutral       |
| 113 | p.Leu113Phe |                   | 4770  | 2565  | 3.34  | 3.78  | 4461  | 1039 | 3.50 | 4.50 | -8.78E+00 | Indeterminate | -8.93E+00 | Indeterminate | -1.40E+01 | Indeterminate |
| 114 | p.Pro114Asn |                   | 1817  | 3514  | 6.12  | 6.50  |       |      |      |      | -5.32E-01 | Deleterious   |           |               | -5.32E-01 | Deleterious   |
| 114 | p.Pro114Lys |                   | 995   | 2390  | 3.35  | 4.42  |       |      |      |      | -5.32E-01 | Deleterious   |           |               | -5.32E-01 | Deleterious   |
| 114 | p.Pro114Thr | Likely pathogenic | 936   | 1298  | 3.15  | 2.40  |       |      |      |      | -5.32E-01 | Deleterious   |           |               | -5.32E-01 | Deleterious   |
| 114 | p.Pro114Arg |                   | 1780  | 3499  | 6.00  | 6.47  |       |      |      |      | -5.32E-01 | Deleterious   |           |               | -5.32E-01 | Deleterious   |
| 114 | p.Pro114Ser |                   | 1360  | 987   | 4.58  | 1.83  |       |      |      |      | -9.07E+00 | Indeterminate |           |               | -9.07E+00 | Indeterminate |
| 114 | p.Pro114Ile |                   | 1197  | 2611  | 4.03  | 4.84  |       |      |      |      | -5.32E-01 | Deleterious   |           |               | -5.32E-01 | Deleterious   |
| 114 | p.Pro114Met |                   | 1125  | 2500  | 3.81  | 4.62  |       |      |      |      | -5.32E-01 | Deleterious   |           |               | -5.32E-01 | Deleterious   |
| 114 | p.Pro114His | Likely pathogenic | 1368  | 3436  | 4.61  | 6.35  |       |      |      |      | -5.32E-01 | Deleterious   |           |               | -5.32E-01 | Deleterious   |
| 114 | p.Pro114Gln |                   | 1806  | 4048  | 6.09  | 7.49  |       |      |      |      | -5.32E-01 | Deleterious   |           |               | -5.32E-01 | Deleterious   |
| 114 | p.Pro114Pro | Synonymous        | 970   | 415   | 3.27  | 0.77  |       |      |      |      | -1.06E+00 | Neutral       |           |               | -1.06E+00 | Neutral       |
| 114 | p.Pro114Leu | Deleterious       | 1586  | 3408  | 5.35  | 6.30  |       |      |      |      | -5.32E-01 | Deleterious   |           |               | -5.32E-01 | Deleterious   |
| 114 | p.Pro114Asp |                   | 1846  | 3955  | 6.22  | 7.31  |       |      |      |      | -5.32E-01 | Deleterious   |           |               | -5.32E-01 | Deleterious   |
| 114 | p.Pro114Glu |                   | 1828  | 3725  | 6.16  | 6.89  |       |      |      |      | -5.32E-01 | Deleterious   |           |               | -5.32E-01 | Deleterious   |
| 114 | p.Pro114Ala |                   | 394   | 187   | 0.35  | 0.35  |       |      |      |      | -8.63E+00 | Indeterminate |           |               | -8.63E+00 | Indeterminate |
| 114 | p.Pro114Gly |                   | 1358  | 1887  | 4.58  | 3.49  |       |      |      |      | -5.32E-01 | Deleterious   |           |               | -5.32E-01 | Deleterious   |
| 114 | p.Pro114Val |                   | 1936  | 2488  | 6.53  | 4.60  |       |      |      |      | -3.48E-01 | Indeterminate |           |               | -3.28E-01 | Indeterminate |
| 114 | p.Pro114Tyr |                   | 1770  | 4188  | 5.97  | 7.74  |       |      |      |      | -5.32E-01 | Deleterious   |           |               | -5.32E-01 | Deleterious   |
| 114 | p.Pro114Cys |                   | 1321  | 903   | 4.45  | 1.67  |       |      |      |      | -7.47E+00 | Indeterminate |           |               | -7.47E+00 | Indeterminate |
| 114 | p.Pro114Trp |                   | 2579  | 5476  | 8.69  | 10.13 |       |      |      |      | -5.32E-01 | Deleterious   |           |               | -5.32E-01 | Deleterious   |
| 114 | p.Pro114Phe |                   | 6933  | 3153  | 5.71  | 5.83  |       |      |      |      | -5.32E-01 | Deleterious   |           |               | -5.32E-01 | Deleterious   |
| 115 | p.Val115Asn |                   | 1628  | 3214  | 5.11  | 4.25  |       |      |      |      | -2.41E+00 | Neutral       |           |               | -2.41E+00 | Neutral       |
| 115 | p.Val115Lys |                   | 5786  | 2973  | 4.93  | 2.93  |       |      |      |      | -3.03E+00 | Neutral       |           |               | -3.03E+00 | Neutral       |
| 115 | p.Val115Thr |                   | 6751  | 3265  | 5.45  | 4.31  |       |      |      |      | -1.57E+00 | Neutral       |           |               | -1.57E+00 | Neutral       |
| 115 | p.Val115Arg |                   | 3621  | 2684  | 2.92  | 3.55  |       |      |      |      | -2.19E-01 | Indeterminate |           |               | -2.19E-01 | Indeterminate |
| 115 | p.Val115Ser |                   | 5887  | 3318  | 4.75  | 4.38  |       |      |      |      | -4.66E+00 | Neutral       |           |               | -4.66E+00 | Neutral       |
| 115 | p.Val115Ile |                   | 4855  | 2279  | 3.92  | 3.01  |       |      |      |      | -2.54E+00 | Neutral       |           |               | -2.54E+00 | Neutral       |
| 115 | p.Val115Met |                   | 7340  | 3600  | 5.92  | 4.76  |       |      |      |      | -1.44E+00 | Neutral       |           |               | -1.44E+00 | Neutral       |
| 115 | p.Val115His |                   | 4929  | 2890  | 3.98  | 3.82  |       |      |      |      | -7.13E+00 | Indeterminate |           |               | -7.13E+00 | Indeterminate |
| 115 | p.Val115Gln |                   | 4345  | 3257  | 3.51  | 4.30  |       |      |      |      | -1.91E-01 | Indeterminate |           |               | -1.91E-01 | Indeterminate |
| 115 | p.Val115Pro |                   | 9037  | 7201  | 11.54 | 14.74 |       |      |      |      | -5.72E+00 | Indeterminate |           |               | -3.31E+01 | Indeterminate |
| 115 | p.Val115Leu |                   | 9713  | 5878  | 7.84  | 7.77  |       |      |      |      | -2.89E+00 | Neutral       |           |               | -2.89E+00 | Neutral       |
| 115 | p.Val115Asp |                   | 5570  | 3650  | 4.50  | 4.82  |       |      |      |      | -9.37E+00 | Indeterminate |           |               | -9.37E+00 | Indeterminate |
| 115 | p.Val115Glu |                   | 4451  | 2694  | 3.59  | 3.56  |       |      |      |      | -9.20E+00 | Indeterminate |           |               | -9.20E+00 | Indeterminate |
| 115 | p.Val115Ala |                   | 3262  | 2371  | 2.63  | 3.13  |       |      |      |      | -2.29E-01 | Indeterminate |           |               | -2.29E-01 | Indeterminate |
| 115 | p.Val115Gly | Synonymous        | 9239  | 5617  | 7.46  | 7.42  |       |      |      |      | -3.24E+00 | Neutral       |           |               | -3.24E+00 | Neutral       |
| 115 | p.Val115Val |                   | 8999  | 4521  | 7.26  | 5.97  |       |      |      |      | -1.06E+00 | Neutral       |           |               | -1.06E+00 | Neutral       |
| 115 | p.Val115Tyr |                   | 5619  | 2709  | 4.54  | 3.58  |       |      |      |      | -2.24E+00 | Neutral       |           |               | -2.24E+00 | Neutral       |
| 115 | p.Val115Cys |                   | 4727  | 2228  | 3.82  | 2.94  |       |      |      |      | -2.73E+00 | Neutral       |           |               | -2.73E+00 | Neutral       |
| 115 | p.Val115Trp |                   | 6028  | 3240  | 4.87  | 4.28  |       |      |      |      | -3.56E+00 | Neutral       |           |               | -3.56E+00 | Neutral       |
| 115 | p.Val115Phe |                   | 7402  | 4130  | 5.97  | 5.46  |       |      |      |      | -3.04E+00 | Neutral       |           |               | -3.04E+00 | Neutral       |
| 116 | p.Asp116Asn |                   | 4943  | 1914  | 2.89  | 2.39  |       |      |      |      | -3.49E+00 | Neutral       |           |               | -3.49E+00 | Neutral       |
| 116 | p.Asp116Lys |                   | 12435 | 4890  | 7.27  | 6.11  |       |      |      |      | -5.04E-01 | Neutral       |           |               | -5.04E-01 | Neutral       |
| 116 | p.Asp116Thr |                   | 6247  | 2920  | 3.65  | 3.65  |       |      |      |      | -5.85E+00 | Indeterminate |           |               | -5.85E+00 | Indeterminate |
| 116 | p.Asp116Arg |                   | 7079  | 3300  | 4.14  | 4.12  |       |      |      |      | -4.81E+00 | Neutral       |           |               | -4.81E+00 | Neutral       |
| 116 | p.Asp116Ser |                   | 10328 | 4273  | 6.04  | 5.34  |       |      |      |      | -1.21E+00 | Neutral       |           |               | -1.21E+00 | Neutral       |
| 116 | p.Asp116Ile |                   | 8211  | 385   | 4.82  |       |       |      |      |      | -3.94E+00 | Neutral       |           |               | -3.94E+00 | Neutral       |
| 116 | p.Asp116Met |                   | 7955  | 2576  | 4.65  | 3.22  |       |      |      |      | -3.32E-01 | Neutral       |           |               | -3.32E-01 | Neutral       |
| 116 | p.Asp116His |                   | 10717 | 4466  | 6.26  | 5.58  |       |      |      |      | -1.16E+00 | Neutral       |           |               | -1.16E+00 | Neutral       |
| 116 | p.Asp116Gln |                   | 8325  | 3445  | 4.87  | 4.30  |       |      |      |      | -1.92E+00 | Neutral       |           |               | -1.92E+00 | Neutral       |
| 116 | p.Asp116Pro |                   | 4065  | 7636  | 2.38  | 9.54  |       |      |      |      | -5.32E-01 | Deleterious   |           |               | -5.32E-01 | Deleterious   |
| 116 | p.Asp116Leu |                   | 7761  | 3355  | 4.54  | 4.19  |       |      |      |      | -2.83E+00 | Neutral       |           |               | -2.83E+00 | Neutral       |
| 116 | p.Asp1      |                   |       |       |       |       |       |      |      |      |           |               |           |               |           |               |

|     |             |       |      |       |       |       |      |      |      |           |               |           |           |               |
|-----|-------------|-------|------|-------|-------|-------|------|------|------|-----------|---------------|-----------|-----------|---------------|
| 118 | p.Ala118Cys | 7840  | 2535 | 6.64  | 4.26  |       |      |      |      | -2.10E+00 | Neutral       |           | -2.10E+00 | Neutral       |
| 118 | p.Ala118Trp | 5510  | 3866 | 4.66  | 6.49  |       |      |      |      | -4.65E+01 | Indeterminate |           | -3.32E+01 | Indeterminate |
| 119 | p.Glu118Phe | 5657  | 3391 | 4.79  | 5.70  |       |      |      |      | -3.16E+01 | Indeterminate |           | -3.12E+01 | Indeterminate |
| 119 | p.Glu119Asn | 4365  | 494  | 4.22  | 3.26  |       |      |      |      | -1.46E+00 | Neutral       |           | -1.46E+00 | Neutral       |
| 119 | p.Glu119Gly | 4474  | 419  | 4.33  | 2.77  |       |      |      |      | -3.00E-01 | Neutral       |           | -3.00E-01 | Neutral       |
| 119 | p.Glu119Thr | 6227  | 566  | 6.02  | 3.74  |       |      |      |      | -6.40E-02 | Neutral       |           | -6.40E-02 | Neutral       |
| 119 | p.Glu119Arg | 3977  | 649  | 3.85  | 4.29  |       |      |      |      | -1.00E+01 | Indeterminate |           | -1.00E+01 | Indeterminate |
| 119 | p.Glu119Ser | 5648  | 290  | 5.46  | 1.92  |       |      |      |      | -3.20E-06 | Neutral       |           | -3.20E-06 | Neutral       |
| 119 | p.Glu119Ile | 4576  | 367  | 4.42  | 2.42  |       |      |      |      | -4.77E-02 | Neutral       |           | -4.77E-02 | Neutral       |
| 119 | p.Glu119Met | 6932  | 1140 | 6.70  | 7.53  |       |      |      |      | -4.89E+00 | Neutral       |           | -4.89E+00 | Neutral       |
| 119 | p.Glu119His | 5341  | 1407 | 5.16  | 9.29  |       |      |      |      | -3.11E+01 | Indeterminate |           | -3.08E+01 | Indeterminate |
| 119 | p.Glu119Gln | 4684  | 1065 | 4.53  | 7.03  |       |      |      |      | -2.38E+00 | Indeterminate |           | -2.38E+00 | Indeterminate |
| 119 | p.Glu119Pro | 4894  | 1402 | 4.73  | 9.26  |       |      |      |      | -4.08E+01 | Indeterminate |           | -3.32E+01 | Indeterminate |
| 119 | p.Glu119Leu | 3932  | 414  | 3.80  | 2.73  |       |      |      |      | -1.13E+00 | Neutral       |           | -1.13E+00 | Neutral       |
| 119 | p.Glu119Asp | 4939  | 865  | 4.78  | 5.71  |       |      |      |      | -9.98E+00 | Indeterminate |           | -9.98E+00 | Indeterminate |
| 119 | p.Glu119Glu | 7139  | 908  | 6.90  | 6.00  |       |      |      |      | -1.06E+00 | Neutral       |           | -1.06E+00 | Neutral       |
| 119 | p.Glu119Ala | 3939  | 268  | 3.81  | 1.77  |       |      |      |      | -9.16E-03 | Neutral       |           | -9.16E-03 | Neutral       |
| 119 | p.Glu119Gly | 6152  | 699  | 5.95  | 4.62  |       |      |      |      | -6.53E-01 | Neutral       |           | -6.53E-01 | Neutral       |
| 119 | p.Glu119Val | 5805  | 939  | 5.61  | 6.20  |       |      |      |      | -5.91E+00 | Indeterminate |           | -5.91E+00 | Indeterminate |
| 119 | p.Glu119Trp | 4931  | 262  | 4.77  | 1.73  |       |      |      |      | -1.97E-05 | Neutral       |           | -1.97E-05 | Neutral       |
| 119 | p.Glu119Cys | 5729  | 354  | 5.54  | 2.34  |       |      |      |      | -1.70E-04 | Neutral       |           | -1.70E-04 | Neutral       |
| 119 | p.Glu119Tyr | 5340  | 1418 | 5.16  | 9.37  |       |      |      |      | -3.18E+01 | Indeterminate |           | -3.13E+01 | Indeterminate |
| 119 | p.Glu119Phe | 4406  | 1213 | 4.26  | 8.01  |       |      |      |      | -4.03E+01 | Indeterminate |           | -3.32E+01 | Indeterminate |
| 120 | p.Glu120Asn | 6668  | 1715 | 6.69  | 7.09  | 5879  | 924  | 6.09 | 6.77 | -2.64E+00 | Neutral       | -9.94E-01 | -1.82E+00 | Neutral       |
| 120 | p.Glu120Lys | 5140  | 1178 | 5.16  | 4.87  | 4764  | 741  | 4.94 | 5.43 | -2.24E+00 | Neutral       | -1.50E+00 | -1.90E+00 | Neutral       |
| 120 | p.Glu120Thr | 4944  | 1177 | 4.96  | 4.87  | 5718  | 665  | 5.93 | 4.87 | -2.98E+00 | Neutral       | -5.61E-02 | -1.40E+00 | Neutral       |
| 120 | p.Glu120Arg | 3381  | 806  | 3.39  | 3.33  | 3318  | 513  | 3.44 | 3.76 | -5.53E+00 | Neutral       | -2.95E+00 | -5.70E+00 | Neutral       |
| 120 | p.Glu120Ser | 4204  | 442  | 3.93  | 3.95  | 5329  | 818  | 5.52 | 5.99 | -2.99E+00 | Neutral       | -4.35E-01 | -1.67E+00 | Neutral       |
| 120 | p.Glu120Ile | 5170  | 1508 | 5.19  | 6.24  | 5138  | 717  | 5.32 | 5.25 | -7.14E+00 | Indeterminate | -5.55E-01 | -5.03E+00 | Neutral       |
| 120 | p.Glu120Met | 3518  | 1081 | 3.53  | 4.47  | 3493  | 547  | 3.62 | 4.01 | -1.37E+01 | Indeterminate | -2.88E+00 | -1.29E+01 | Indeterminate |
| 120 | p.Glu120His | 4893  | 1157 | 4.91  | 4.79  | 4467  | 725  | 4.63 | 5.31 | -2.93E+00 | Neutral       | -2.23E+00 | -2.96E+00 | Neutral       |
| 120 | p.Glu120Gln | 5102  | 1362 | 5.12  | 5.63  | 4390  | 675  | 4.55 | 4.95 | -4.98E+00 | Neutral       | -1.66E+00 | -4.15E+00 | Neutral       |
| 120 | p.Glu120Pro | 3878  | 1004 | 3.89  | 4.15  | 4187  | 558  | 4.34 | 4.09 | -6.48E+00 | Indeterminate | -6.65E-01 | -4.57E+00 | Neutral       |
| 120 | p.Glu120Leu | 4277  | 850  | 4.29  | 3.52  | 3887  | 565  | 4.03 | 4.14 | -1.35E+00 | Neutral       | -1.50E+00 | -1.27E+00 | Neutral       |
| 120 | p.Glu120Asp | 5594  | 1357 | 5.61  | 5.09  | 5861  | 821  | 5.28 | 6.02 | -2.64E+00 | Neutral       | -1.62E+00 | -2.28E+00 | Neutral       |
| 120 | p.Glu120Glu | 5994  | 1288 | 6.01  | 5.33  | 5329  | 818  | 5.52 | 5.99 | -1.06E+00 | Neutral       | -1.06E+00 | -8.18E-01 | Neutral       |
| 120 | p.Glu120Ala | 4804  | 1061 | 4.82  | 4.39  | 5170  | 515  | 5.36 | 3.77 | -2.06E+00 | Neutral       | -1.00E-02 | -7.85E-01 | Neutral       |
| 120 | p.Glu120Gly | 4006  | 926  | 4.02  | 3.83  | 4433  | 514  | 4.59 | 3.77 | -3.67E+00 | Neutral       | -1.48E-01 | -1.95E+00 | Neutral       |
| 120 | p.Glu120Val | 5499  | 1316 | 5.52  | 5.44  | 5200  | 764  | 5.39 | 5.60 | -2.53E+00 | Neutral       | -8.14E-01 | -1.61E+00 | Neutral       |
| 120 | p.Glu120Tyr | 2339  | 529  | 2.35  | 2.19  | 2119  | 350  | 2.20 | 2.56 | -7.40E+00 | Indeterminate | -7.88E+00 | -1.18E+01 | Indeterminate |
| 120 | p.Glu120Cys | 6757  | 1679 | 6.78  | 6.94  | 6708  | 1017 | 6.95 | 7.45 | -2.12E+00 | Neutral       | -5.29E-01 | -1.14E+00 | Neutral       |
| 120 | p.Glu120Trp | 5516  | 1474 | 5.53  | 6.10  | 5475  | 719  | 5.67 | 5.27 | -4.44E+00 | Neutral       | -2.62E-01 | -2.61E+00 | Neutral       |
| 120 | p.Glu120Phe | 7976  | 1759 | 8.00  | 7.28  | 6501  | 1009 | 8.06 | 7.39 | -6.15E-02 | Neutral       |           | -4.57E+00 | Neutral       |
| 121 | p.Leu121Asn | 5557  | 2222 | 3.85  | 4.08  |       |      |      |      | -4.57E+00 | Neutral       |           | -4.57E+00 | Neutral       |
| 121 | p.Leu121Lys | 5913  | 2024 | 4.10  | 3.72  |       |      |      |      | -1.77E+00 | Neutral       |           | -1.77E+00 | Neutral       |
| 121 | p.Leu121Thr | 7287  | 2639 | 5.05  | 4.85  |       |      |      |      | -1.63E+00 | Neutral       |           | -1.63E+00 | Neutral       |
| 121 | p.Leu121Arg | 6565  | 3538 | 4.55  | 6.50  |       |      |      |      | -1.20E+01 | Indeterminate |           | -1.20E+01 | Indeterminate |
| 121 | p.Leu121Ser | 4991  | 1747 | 3.46  | 3.21  |       |      |      |      | -2.80E+00 | Neutral       |           | -2.80E+00 | Neutral       |
| 121 | p.Leu121Ile | 6708  | 2326 | 4.65  | 4.27  |       |      |      |      | -1.47E+00 | Neutral       |           | -1.47E+00 | Neutral       |
| 121 | p.Leu121Met | 7054  | 9643 | 4.89  | 17.72 |       |      |      |      | -5.32E-01 | Deleterious   |           | -5.32E-01 | Deleterious   |
| 121 | p.Leu121His | 6679  | 1883 | 4.63  | 3.46  |       |      |      |      | -2.79E+01 | Neutral       |           | -2.79E+01 | Neutral       |
| 121 | p.Leu121Gln | 6870  | 2290 | 4.76  | 4.21  |       |      |      |      | -1.06E+00 | Neutral       |           | -1.06E+00 | Neutral       |
| 121 | p.Leu121Pro | 6118  | 1809 | 4.24  | 3.32  |       |      |      |      | -5.61E-01 | Neutral       |           | -5.61E-01 | Neutral       |
| 121 | p.Leu121Leu | 5345  | 1640 | 3.71  | 3.01  |       |      |      |      | -1.06E+00 | Neutral       |           | -1.06E+00 | Neutral       |
| 121 | p.Leu121Asp | 20642 | 4114 | 14.32 | 7.56  |       |      |      |      | -9.42E-07 | Neutral       |           | -9.42E-07 | Neutral       |
| 121 | p.Leu121Glu | 8089  | 3520 | 5.61  | 6.47  |       |      |      |      | -3.77E+00 | Neutral       |           | -3.77E+00 | Neutral       |
| 121 | p.Leu121Ala | 5113  | 1790 | 3.55  | 3.29  |       |      |      |      | -2.68E+00 | Neutral       |           | -2.68E+00 | Neutral       |
| 121 | p.Leu121Gly | 7464  | 3126 | 5.18  | 5.74  |       |      |      |      | -3.55E+00 | Neutral       |           | -3.55E+00 | Neutral       |
| 121 | p.Leu121Val | 8431  | 585  | 2.17  | 3.99  |       |      |      |      | -4.01E+01 | Neutral       |           | -4.01E+01 | Neutral       |
| 121 | p.Leu121Tyr | 4665  | 1066 | 3.24  | 1.96  |       |      |      |      | -1.05E-01 | Neutral       |           | -1.05E-01 | Neutral       |
| 121 | p.Leu121Cys | 6774  | 1898 | 4.70  | 3.49  |       |      |      |      | -2.50E-01 | Neutral       |           | -2.50E-01 | Neutral       |
| 121 | p.Leu121Trp | 7344  | 2981 | 5.09  | 5.48  |       |      |      |      | -3.11E+00 | Neutral       |           | -3.11E+00 | Neutral       |
| 121 | p.Leu121Phe | 6583  | 1996 | 4.57  | 3.67  |       |      |      |      | -6.56E-01 | Neutral       |           | -6.56E-01 | Neutral       |
| 122 | p.Gly122Asn | 7569  | 3399 | 4.56  | 3.94  | 11922 | 382  | 4.65 | 2.73 | -4.61E-01 | Neutral       | -1.76E-05 | -6.09E-02 | Neutral       |
| 122 | p.Gly122Lys | 8834  | 4858 | 5.33  | 5.63  | 14027 | 527  | 5.47 | 3.77 | -1.46E+00 | Neutral       | -1.66E-04 | -4.53E-01 | Neutral       |
| 122 | p.Gly122Thr | 9750  | 4942 | 5.88  | 5.73  | 14935 | 744  | 5.83 | 5.32 | -6.31E-01 | Neutral       | -1.67E-02 | -1.13E+01 | Neutral       |
| 122 | p.Gly122Arg | 9626  | 5801 | 6.07  | 13461 | 1005  | 525  | 7.18 | 7.18 | -2.86E+00 | Neutral       | -1.50E+00 | -2.87E+00 | Neutral       |
| 122 | p.Gly122Ser | 10109 | 4589 | 6.09  | 5.32  | 14333 | 666  | 5.24 | 4.76 | -2.03E-01 | Neutral       | -2.60E-02 | -1.65E-02 | Neutral       |
| 122 | p.Gly122Ile | 5859  | 3683 | 3.53  | 4.27  | 11299 | 488  | 4.41 | 3.49 | -6.10E+00 | Indeterminate | -7.76E-03 | -3.72E+00 | Neutral       |
| 122 | p.Gly122Met | 8522  | 3997 | 5.14  | 4.63  | 12277 | 772  | 4.79 | 5.52 | -4.78E-01 | Neutral       | -5.21E-01 | -2.40E+01 | Neutral       |
| 122 | p.Gly122His | 8831  | 4052 | 5.32  | 4.70  | 13991 | 782  | 5.46 | 5.59 | -3.52E-01 | Neutral       | -1.02E-01 | -5.93E-02 | Neutral       |
| 122 | p.Gly122Gln | 9295  | 4626 | 5.60  | 5.36  | 13146 | 527  | 5.13 | 3.77 | -6.19E-01 | Neutral       | -8.97E-04 | -1.04E+01 | Neutral       |
| 122 | p.Gly122Pro | 7279  | 3497 | 4.39  | 4.05  | 11943 | 942  | 4.66 | 6.73 | -8.88E-01 | Neutral       | -2.66E+00 | -1.75E+00 | Neutral       |
| 122 | p.Gly122Leu | 6446  | 3447 | 3.89  | 4.00  | 10134 | 422  | 3.95 | 3.02 | -2.35E+00 | Neutral       | -7.71E-03 | -9.59E+01 | Neutral       |
| 122 | p.Gly122Asp | 8712  | 4580 | 5.25  | 5.31  | 14156 | 564  | 5.52 | 4.03 | -1.11E+00 | Neutral       | -5.01E-04 | -4.01E+00 | Neutral       |
| 122 | p.Gly122Glu | 9974  | 5662 | 6.01  | 6.56  | 15722 | 654  | 6.13 | 4.67 | -1.38E+00 | Neutral       | -5.87E-04 | -4.14E+01 | Neutral       |
| 122 | p.Gly122Ala | 8715  | 4648 | 5.25  | 5.39  | 14349 | 673  | 5.60 | 4.81 | -1.23E+00 | Neutral       | -8.15E-03 | -3.43E-01 | Neutral       |
| 122 | p.Gly122Gly | 6971  | 3382 | 4.20  | 3.92  | 9670  | 615  | 3.77 | 4.40 | -1.06E+00 | Neutral       | -1.06E+00 | -8.18E-01 | Neutral       |
| 122 | p.Gly122Val | 7691  | 3268 | 4.64  | 3.79  | 12215 | 711  | 4.77 | 5.08 | -2.61E-01 | Neutral       | -2.59E-01 | -7.59E-02 | Neutral       |
| 122 | p.Gly122Tyr | 9213  | 4716 | 5.55  | 5.47  | 14745 | 1063 | 5.75 | 7.60 | -7.93E-01 | Neutral       | -9.53E-01 | -6.02E+01 | Neutral       |
| 122 | p.Gly122Cys | 6227  | 4023 | 3.75  | 4.66  | 9379  | 574  | 3.66 | 4.10 | -6.29E+00 | Indeterminate | -8.61E-01 | -4.58E+00 | Neutral       |
| 122 | p.Gly122Trp | 6552  | 2705 | 3.95  | 3.14  | 8809  | 789  | 3.44 | 5.64 | -3.31E-01 | Neutral       | -7.69E+00 | -5.31E+00 | Neutral       |
| 122 | p.Gly122Phe | 9687  | 6084 | 5.84  | 7.05  | 16655 | 1092 | 6.50 | 7.80 | -2.71E+00 | Neutral       | -3.03E-01 | -1.39E+00 | Neutral       |
| 123 | p.His123Asn | 7749  | 1318 | 5.54  | 5.67  | 4136  | 391  | 5.18 | 4.24 | -6.16E+00 | Indeterminate | -2.67E+00 | -6.00E+00 | Indeterminate |
| 123 | p.His123Lys | 8216  | 869  | 5.87  | 3.74  | 4134  | 343  | 5.17 | 3.72 | -2.36E-01 | Neutral       | -1.19E+00 | -4.32E+01 | Neutral       |
| 123 | p.His123Thr | 5633  | 1158 | 4.03  | 4.98  | 3132  | 397  | 3.92 | 4.31 | -1.76E+01 | Indeterminate | -1.36E+01 | -2.66E+01 | Indeterminate |
| 123 | p.His123Arg | 7158  | 1021 | 5.12  | 4.39  | 3689  | 331  | 4.62 | 3.59 | -3.03E+00 | Neutral       | -2.46E+00 | -3.23E+00 | Neutral       |
| 123 | p.His123Ser | 6242  | 951  | 4.46  | 4.09  | 3377  | 270  | 4.23 | 2.93 | -5.21E+00 | Neutral       | -1.45E+00 | -4.18E+00 | Neutral       |
| 123 | p.His123Ile | 6667  | 1082 | 4.76  | 4.65  | 3468  | 304  | 4.34 | 3.30 | -6.24E+00 | Indeterminate | -2.42E+00 | -5.85E+00 | Indeterminate |
| 123 | p.His123Met | 7540  | 1467 | 5.39  | 6.31  | 4059  | 452  | 5.08 | 4.91 | -1.07E+01 | Indeterminate | -6.08E+00 | -1.31E+01 | Indeterminate |
| 123 | p.His123His | 8307  | 1051 | 5.94  | 5.73  | 4588  | 388  | 5.74 | 4.21 | -1.06E+00 | Neutral       | -1.06E+00 | -8.18E-01 | Neutral       |
| 123 | p.His123Gln | 7177  | 959  | 5.13  | 4.12  | 4451  | 353  | 5.57 | 3.83 | -2.09E+00 | Neutral       | -7.04E-01 | -1.24E+00 | Neutral       |
| 123 | p.His123Pro | 4158  | 18   |       |       |       |      |      |      |           |               |           |           |               |

|     |             |       |       |      |       |      |      |      |       |           |               |           |               |           |               |
|-----|-------------|-------|-------|------|-------|------|------|------|-------|-----------|---------------|-----------|---------------|-----------|---------------|
| 125 | p.Asp125Tyr | 3302  | 6200  | 6.03 | 15.38 | 4205 | 5560 | 6.34 | 17.82 | -2.96E+01 | Indeterminate | -3.71E+01 | Indeterminate | -5.32E+01 | Deleterious   |
| 125 | p.Asp125Cys | 3684  | 3165  | 6.72 | 7.85  | 4837 | 1450 | 7.30 | 4.65  | -9.62E-01 | Neutral       | -2.29E-04 | Neutral       | -2.25E-01 | Neutral       |
| 125 | p.Asp125Trp | 3184  | 2210  | 5.81 | 5.48  | 3864 | 1751 | 5.83 | 5.61  | -2.29E-01 | Neutral       | -3.15E-01 | Neutral       | -8.23E-02 | Neutral       |
| 125 | p.Asp125Phe | 2896  | 1702  | 5.29 | 4.22  | 3460 | 1919 | 5.22 | 6.15  | -4.79E-02 | Neutral       | -1.96E+00 | Neutral       | -7.48E-01 | Neutral       |
| 126 | p.Val126Asn | 13592 | 1396  | 4.72 | 1.65  |      |      |      |       | -4.72E-01 | Neutral       |           | Neutral       | -4.72E-01 | Neutral       |
| 126 | p.Val126Lys | 15516 | 11295 | 5.38 | 13.32 |      |      |      |       | -5.32E+01 | Deleterious   |           | Neutral       | -5.32E+01 | Deleterious   |
| 126 | p.Val126Thr | 13332 | 577   | 4.63 | 0.68  |      |      |      |       | -1.29E-07 | Neutral       |           | Neutral       | -1.28E-07 | Neutral       |
| 126 | p.Val126Arg | 18926 | 19643 | 6.57 | 23.16 |      |      |      |       | -5.32E+01 | Deleterious   |           | Neutral       | -5.32E+01 | Deleterious   |
| 126 | p.Val126Ser | 13725 | 918   | 4.76 | 1.08  |      |      |      |       | -1.54E-03 | Neutral       |           | Neutral       | -1.54E-03 | Neutral       |
| 126 | p.Val126Ile | 16166 | 1121  | 5.61 | 1.32  |      |      |      |       | -1.10E-03 | Neutral       |           | Neutral       | -1.10E-03 | Neutral       |
| 126 | p.Val126Met | 19562 | 1317  | 6.79 | 1.55  |      |      |      |       | -1.83E-04 | Neutral       |           | Neutral       | -1.83E-04 | Neutral       |
| 126 | p.Val126His | 14043 | 4631  | 4.87 | 5.46  |      |      |      |       | -5.30E+00 | Indeterminate |           | Neutral       | -3.32E+01 | Indeterminate |
| 126 | p.Val126Gln | 16828 | 2136  | 5.84 | 2.52  |      |      |      |       | -1.39E+00 | Neutral       |           | Neutral       | -1.39E+00 | Neutral       |
| 126 | p.Val126Pro | 14969 | 885   | 5.19 | 1.04  |      |      |      |       | -7.83E-05 | Neutral       |           | Neutral       | -7.83E-05 | Neutral       |
| 126 | p.Val126Leu | 12287 | 717   | 4.26 | 0.85  |      |      |      |       | -2.30E-04 | Neutral       |           | Neutral       | -2.30E-04 | Neutral       |
| 126 | p.Val126Asp | 10860 | 7618  | 3.77 | 8.98  |      |      |      |       | -5.32E+01 | Deleterious   |           | Neutral       | -5.32E+01 | Deleterious   |
| 126 | p.Val126Glu | 15495 | 1254  | 5.38 | 1.48  |      |      |      |       | -1.80E-02 | Neutral       |           | Neutral       | -1.80E-02 | Neutral       |
| 126 | p.Val126Ala | 13910 | 1058  | 4.83 | 1.25  |      |      |      |       | -1.21E-02 | Neutral       |           | Neutral       | -1.21E-02 | Neutral       |
| 126 | p.Val126Gly | 13329 | 1339  | 4.62 | 1.58  |      |      |      |       | -4.10E-01 | Neutral       |           | Neutral       | -4.10E-01 | Neutral       |
| 126 | p.Val126Val | 10679 | 1121  | 3.70 | 1.32  |      |      |      |       | -1.06E+00 | Neutral       |           | Neutral       | -1.06E+00 | Neutral       |
| 126 | p.Val126Tyr | 14358 | 11033 | 4.98 | 13.01 |      |      |      |       | -5.32E+01 | Deleterious   |           | Neutral       | -5.32E+01 | Deleterious   |
| 126 | p.Val126Cys | 10597 | 503   | 3.68 | 0.59  |      |      |      |       | -7.77E-06 | Neutral       |           | Neutral       | -7.77E-06 | Neutral       |
| 126 | p.Val126Trp | 16355 | 14867 | 5.67 | 17.53 |      |      |      |       | -5.32E+01 | Deleterious   |           | Neutral       | -5.32E+01 | Deleterious   |
| 126 | p.Val126Phe | 13728 | 1397  | 4.76 | 1.65  |      |      |      |       | -4.22E-01 | Neutral       |           | Neutral       | -4.22E-01 | Neutral       |
| 127 | p.Ala127Asn | 7524  | 1490  | 4.20 | 2.73  |      |      |      |       | -1.01E+00 | Neutral       |           | Neutral       | -1.01E+00 | Neutral       |
| 127 | p.Ala127Lys | 7364  | 2041  | 4.11 | 3.74  |      |      |      |       | -6.63E+00 | Indeterminate |           | Neutral       | -6.63E+00 | Indeterminate |
| 127 | p.Ala127Thr | 7875  | 3331  | 4.40 | 6.11  |      |      |      |       | -2.48E+01 | Indeterminate |           | Neutral       | -2.48E+01 | Indeterminate |
| 127 | p.Ala127Arg | 10173 | 4327  | 5.68 | 7.93  |      |      |      |       | -1.99E+00 | Indeterminate |           | Neutral       | -1.99E+00 | Indeterminate |
| 127 | p.Ala127Ser | 9439  | 2253  | 5.27 | 4.13  |      |      |      |       | -2.10E+00 | Neutral       |           | Neutral       | -2.10E+00 | Neutral       |
| 127 | p.Ala127Ile | 8459  | 3367  | 4.72 | 6.17  |      |      |      |       | -1.96E+01 | Indeterminate |           | Neutral       | -1.96E+01 | Indeterminate |
| 127 | p.Ala127Met | 10187 | 2188  | 5.69 | 4.01  |      |      |      |       | -8.74E-01 | Neutral       |           | Neutral       | -8.74E-01 | Neutral       |
| 127 | p.Ala127His | 7847  | 3375  | 4.38 | 6.19  |      |      |      |       | -2.60E+01 | Indeterminate |           | Neutral       | -2.60E+01 | Indeterminate |
| 127 | p.Ala127Gln | 9425  | 2342  | 5.26 | 4.29  |      |      |      |       | -2.66E+00 | Neutral       |           | Neutral       | -2.66E+00 | Neutral       |
| 127 | p.Ala127Pro | 5169  | 5329  | 2.89 | 9.77  |      |      |      |       | -5.32E+01 | Deleterious   |           | Neutral       | -5.32E+01 | Deleterious   |
| 127 | p.Ala127Cys | 9185  | 2356  | 5.13 | 4.32  |      |      |      |       | -3.30E+00 | Neutral       |           | Neutral       | -3.30E+00 | Neutral       |
| 127 | p.Ala127Asp | 10308 | 8893  | 5.76 | 7.14  |      |      |      |       | -1.37E+00 | Indeterminate |           | Neutral       | -1.37E+01 | Indeterminate |
| 127 | p.Ala127Glu | 11153 | 2432  | 6.23 | 4.46  |      |      |      |       | -7.79E-01 | Neutral       |           | Neutral       | -7.79E-01 | Neutral       |
| 127 | p.Ala127Ala | 7852  | 1588  | 4.38 | 2.91  |      |      |      |       | -1.06E+00 | Neutral       |           | Neutral       | -1.06E+00 | Neutral       |
| 127 | p.Ala127Gly | 8262  | 2466  | 4.61 | 4.52  |      |      |      |       | -7.66E+00 | Indeterminate |           | Neutral       | -7.66E+00 | Indeterminate |
| 127 | p.Ala127Val | 11122 | 2140  | 6.21 | 3.92  |      |      |      |       | -2.61E-01 | Neutral       |           | Neutral       | -2.61E-01 | Neutral       |
| 127 | p.Ala127Tyr | 7626  | 2133  | 4.26 | 3.91  |      |      |      |       | -6.50E+00 | Indeterminate |           | Neutral       | -6.50E+00 | Indeterminate |
| 127 | p.Ala127Cys | 8750  | 1407  | 4.89 | 2.58  |      |      |      |       | -8.73E-02 | Neutral       |           | Neutral       | -8.73E-02 | Neutral       |
| 127 | p.Ala127Trp | 10780 | 3177  | 6.02 | 5.82  |      |      |      |       | -5.00E+00 | Neutral       |           | Neutral       | -5.00E+00 | Neutral       |
| 127 | p.Ala127Phe | 10582 | 2912  | 5.91 | 5.34  |      |      |      |       | -3.71E+00 | Neutral       |           | Neutral       | -3.71E+00 | Neutral       |
| 128 | p.Arg128Asn | 2284  | 409   | 3.90 | 1.59  |      |      |      |       | -5.62E-05 | Neutral       |           | Neutral       | -5.62E-05 | Neutral       |
| 128 | p.Arg128Lys | 3039  | 1401  | 5.19 | 5.46  |      |      |      |       | -2.71E+00 | Neutral       |           | Neutral       | -2.71E+00 | Neutral       |
| 128 | p.Arg128Thr | 3022  | 1036  | 5.16 | 4.04  |      |      |      |       | -3.17E-01 | Neutral       |           | Neutral       | -3.17E-01 | Neutral       |
| 128 | p.Arg128Arg | 5105  | 2409  | 8.72 | 9.39  |      |      |      |       | -1.06E+00 | Neutral       |           | Neutral       | -1.06E+00 | Neutral       |
| 128 | p.Arg128Ser | 2145  | 1444  | 3.66 | 5.63  |      |      |      |       | -1.91E+01 | Indeterminate |           | Neutral       | -1.91E+01 | Indeterminate |
| 128 | p.Arg128Ile | 3252  | 1959  | 5.55 | 7.63  |      |      |      |       | -8.33E+00 | Indeterminate |           | Neutral       | -8.33E+00 | Indeterminate |
| 128 | p.Arg128Met | 2925  | 1150  | 4.99 | 4.48  |      |      |      |       | -1.08E+00 | Neutral       |           | Neutral       | -1.08E+00 | Neutral       |
| 128 | p.Arg128His | 1803  | 728   | 3.08 | 2.84  |      |      |      |       | -3.37E+00 | Neutral       |           | Neutral       | -3.37E+00 | Neutral       |
| 128 | p.Arg128Gln | 2303  | 651   | 3.93 | 2.54  |      |      |      |       | -1.07E-01 | Neutral       |           | Neutral       | -1.07E-01 | Neutral       |
| 128 | p.Arg128Pro | 2278  | 2859  | 3.89 | 11.14 |      |      |      |       | -5.32E+01 | Deleterious   |           | Neutral       | -5.32E+01 | Deleterious   |
| 128 | p.Arg128Leu | 1945  | 682   | 3.32 | 2.66  |      |      |      |       | -1.25E+00 | Neutral       |           | Neutral       | -1.25E+00 | Neutral       |
| 128 | p.Arg128Asp | 2937  | 906   | 5.02 | 3.53  |      |      |      |       | -1.15E-01 | Neutral       |           | Neutral       | -1.15E-01 | Neutral       |
| 128 | p.Arg128Glu | 4092  | 1701  | 6.99 | 6.63  |      |      |      |       | -7.08E-01 | Neutral       |           | Neutral       | -7.08E-01 | Neutral       |
| 128 | p.Arg128Ala | 2727  | 946   | 4.66 | 3.69  |      |      |      |       | -4.82E-01 | Neutral       |           | Neutral       | -4.82E-01 | Neutral       |
| 128 | p.Arg128Cys | 13260 | 1836  | 5.57 | 6.06  |      |      |      |       | -6.37E+00 | Indeterminate |           | Neutral       | -6.37E+00 | Indeterminate |
| 128 | p.Arg128Val | 3216  | 980   | 5.49 | 3.82  |      |      |      |       | -6.95E-02 | Neutral       |           | Neutral       | -6.95E-02 | Neutral       |
| 128 | p.Arg128Tyr | 2778  | 1025  | 4.74 | 3.99  |      |      |      |       | -7.63E-01 | Neutral       |           | Neutral       | -7.63E-01 | Neutral       |
| 128 | p.Arg128Cys | 2996  | 723   | 5.12 | 2.82  |      |      |      |       | -3.13E-03 | Neutral       |           | Neutral       | -3.13E-03 | Neutral       |
| 128 | p.Arg128Trp | 3307  | 1044  | 5.65 | 4.07  |      |      |      |       | -9.54E-02 | Neutral       |           | Neutral       | -9.54E-02 | Neutral       |
| 128 | p.Arg128Phe | 3149  | 1776  | 5.38 | 6.92  |      |      |      |       | -6.69E+00 | Indeterminate |           | Neutral       | -6.69E+00 | Indeterminate |
| 129 | p.Tyr129Asn | 3172  | 1902  | 2.84 | 4.42  |      |      |      |       | -4.63E+01 | Indeterminate |           | Neutral       | -3.32E+01 | Indeterminate |
| 129 | p.Tyr129Lys | 5186  | 1692  | 4.64 | 3.93  |      |      |      |       | -3.97E+00 | Neutral       |           | Neutral       | -3.97E+00 | Neutral       |
| 129 | p.Tyr129Thr | 3503  | 1741  | 5.14 | 4.05  |      |      |      |       | -2.74E+01 | Indeterminate |           | Neutral       | -2.74E+01 | Indeterminate |
| 129 | p.Tyr129Arg | 6578  | 1764  | 5.89 | 4.10  |      |      |      |       | -7.14E-01 | Neutral       |           | Neutral       | -7.14E-01 | Neutral       |
| 129 | p.Tyr129Ser | 3563  | 958   | 3.19 | 2.23  |      |      |      |       | -2.79E+00 | Neutral       |           | Neutral       | -2.79E+00 | Neutral       |
| 129 | p.Tyr129Ile | 5889  | 2057  | 5.27 | 4.78  |      |      |      |       | -4.50E+00 | Neutral       |           | Neutral       | -4.50E+00 | Neutral       |
| 129 | p.Tyr129Met | 4837  | 1185  | 4.33 | 2.76  |      |      |      |       | -7.83E-01 | Neutral       |           | Neutral       | -7.83E-01 | Neutral       |
| 129 | p.Tyr129His | 5494  | 1466  | 4.92 | 3.41  |      |      |      |       | -1.08E+00 | Neutral       |           | Neutral       | -1.08E+00 | Neutral       |
| 129 | p.Tyr129Gln | 6782  | 1841  | 6.07 | 4.28  |      |      |      |       | -7.26E-01 | Neutral       |           | Neutral       | -7.26E-01 | Neutral       |
| 129 | p.Tyr129Pro | 4492  | 9559  | 4.02 | 22.23 |      |      |      |       | -5.32E+01 | Deleterious   |           | Neutral       | -5.32E+01 | Deleterious   |
| 129 | p.Tyr129Leu | 4705  | 1043  | 5.21 | 2.43  |      |      |      |       | -3.61E+01 | Neutral       |           | Neutral       | -3.61E+01 | Neutral       |
| 129 | p.Tyr129Asp | 7326  | 3885  | 6.56 | 9.03  |      |      |      |       | -1.65E+01 | Indeterminate |           | Neutral       | -1.65E+01 | Indeterminate |
| 129 | p.Tyr129Glu | 5802  | 1453  | 5.19 | 3.38  |      |      |      |       | -5.74E-01 | Neutral       |           | Neutral       | -5.74E-01 | Neutral       |
| 129 | p.Tyr129Ala | 8100  | 2262  | 7.25 | 5.26  |      |      |      |       | -5.65E-01 | Neutral       |           | Neutral       | -5.65E-01 | Neutral       |
| 129 | p.Tyr129Gly | 6216  | 2149  | 5.56 | 5.00  |      |      |      |       | -3.93E+00 | Neutral       |           | Neutral       | -3.93E+00 | Neutral       |
| 129 | p.Tyr129Val | 7809  | 2285  | 6.99 | 5.31  |      |      |      |       | -9.02E-01 | Neutral       |           | Neutral       | -9.02E-01 | Neutral       |
| 129 | p.Tyr129Tyr | 4524  | 1129  | 4.05 | 2.63  |      |      |      |       | -1.06E+00 | Neutral       |           | Neutral       | -1.06E+00 | Neutral       |
| 129 | p.Tyr129Cys | 5819  | 1556  | 5.21 | 3.62  |      |      |      |       | -9.55E-01 | Neutral       |           | Neutral       | -9.55E-01 | Neutral       |
| 129 | p.Tyr129Trp | 6000  | 1338  | 5.37 | 3.11  |      |      |      |       | -1.71E-01 | Neutral       |           | Neutral       | -1.71E-01 | Neutral       |
| 129 | p.Tyr129Phe | 5935  | 1736  | 5.31 | 4.04  |      |      |      |       | -1.69E+00 | Neutral       |           | Neutral       | -1.69E+00 | Neutral       |
| 130 | p.Leu130Asn | 6622  | 5730  | 3.98 | 4.80  |      |      |      |       | -2.91E+01 | Indeterminate |           | Neutral       | -2.90E+01 | Indeterminate |
| 130 | p.Leu130Lys | 6586  | 10703 | 3.96 | 8.96  |      |      |      |       | -5.32E+01 | Deleterious   |           | Neutral       | -5.32E+01 | Deleterious   |
| 130 | p.Leu130Thr | 8414  | 4005  | 5.06 | 3.35  |      |      |      |       | -2.31E+00 | Neutral       |           | Neutral       | -2.31E+00 | Neutral       |
| 130 | p.Leu130Arg | 6954  | 11309 | 4.18 | 9.47  |      |      |      |       | -5.32E+01 | Deleterious   |           | Neutral       | -5.32E+01 | Deleterious   |
| 130 | p.Leu130Ser | 10649 | 5793  | 6.40 | 4.85  |      |      |      |       | -3.13E+00 | Neutral       |           | Neutral       | -3.13E+00 | Neutral       |
| 130 | p.Leu130Ile | 11747 | 4756  | 7.06 | 3.98  |      |      |      |       | -2.97E-01 | Neutral       |           | Neutral       | -2.97E-01 | Neutral       |
| 130 | p.Leu130Met | 8403  | 3454  | 5.05 | 2.89  |      |      |      |       | -8.77E-01 | Neutral       |           | Neutral       | -8.77E-01 | Neutral       |
| 130 | p.Leu130His | 5760  | 4572  | 3.46 | 3.83  |      |      |      |       | -2.62E+01 | Indeterminate |           | Neutral       | -2.62E+01 | Indeterminate |
| 130 | p.Leu130Gln | 6416  | 4936  | 3.86 | 4.13  |      |      |      |       | -2.19E+01 | Indeterminate |           | Neutral       | -2.19E+01 | Indeterminate |
| 130 | p.Leu130Pro | 5787  | 9545  | 3.48 | 7.99  |      |      |      |       | -5.32E+01 | Deleterious   |           | Neutral       | -5.32E+01 | Deleterious   |
| 130 | p.Leu130Leu | 9828  | 4367  | 5.91 | 3.66  |      |      |      |       | -1.06E+00 | Neutral       |           | Neutral       | -1.06E+00 | Neutral       |
| 130 | p.Leu130Asp | 7930  | 10361 | 4.77 | 8.67  |      |      |      |       | -5.32E+01 | Deleterious   |           | Neutral       | -5.32E+01 | Deleterious   |
| 130 | p.Leu130Glu | 9503  | 11579 | 5.71 | 9.69  |      |      |      |       | -4.90E+01 | Indeterminate |           | Neutral       | -3.32E+01 | Indeterminate |
| 130 | p.Leu130Ala | 6719  | 3124  | 4.04 | 2.62  |      |      |      |       |           |               |           |               |           |               |

|     |             |       |       |      |      |       |      |       |       |           |               |           |               |               |
|-----|-------------|-------|-------|------|------|-------|------|-------|-------|-----------|---------------|-----------|---------------|---------------|
| 132 | p.Ala132Val | 7251  | 3409  | 6.67 | 5.55 |       |      |       |       | -4.37E+00 | Neutral       |           | -4.37E+00     | Neutral       |
| 132 | p.Ala132Tyr | 5165  | 2556  | 4.75 | 4.16 |       |      |       |       | -8.74E+00 | Indeterminate |           | -8.74E+00     | Indeterminate |
| 132 | p.Ala132Cys | 8345  | 5592  | 7.68 | 9.10 |       |      |       |       | -1.44E+01 | Indeterminate |           | -1.44E+01     | Indeterminate |
| 132 | p.Ala132Trp | 5564  | 2457  | 5.12 | 4.00 |       |      |       |       | -9.92E+00 | Neutral       |           | -9.92E+00     | Neutral       |
| 132 | p.Ala132Phe | 4977  | 2057  | 4.58 | 3.35 |       |      |       |       | -4.29E+00 | Neutral       |           | -4.29E+00     | Neutral       |
| 133 | p.Ala133Asn | 4372  | 938   | 4.80 | 3.57 |       |      |       |       | -2.23E-02 | Neutral       |           | -2.23E-02     | Neutral       |
| 133 | p.Ala133Lys | 4380  | 1041  | 4.81 | 3.96 |       |      |       |       | -8.53E-02 | Neutral       |           | -8.53E-02     | Neutral       |
| 133 | p.Ala133Thr | 4331  | 1060  | 4.76 | 4.03 |       |      |       |       | -1.26E-01 | Neutral       |           | -1.26E-01     | Neutral       |
| 133 | p.Ala133Arg | 3954  | 1335  | 4.34 | 5.08 |       |      |       |       | -2.27E+00 | Neutral       |           | -2.27E+00     | Neutral       |
| 133 | p.Ala133Ser | 6658  | 1862  | 7.31 | 7.08 |       |      |       |       | -1.13E-01 | Neutral       |           | -1.13E-01     | Neutral       |
| 133 | p.Ala133Ile | 4627  | 1388  | 5.08 | 5.28 |       |      |       |       | -7.13E-01 | Neutral       |           | -7.13E-01     | Neutral       |
| 133 | p.Ala133Met | 6154  | 1438  | 5.76 | 5.47 |       |      |       |       | -1.48E-02 | Neutral       |           | -1.48E-02     | Neutral       |
| 133 | p.Ala133His | 2367  | 508   | 2.60 | 1.93 |       |      |       |       | -2.62E-01 | Neutral       |           | -2.62E-01     | Neutral       |
| 133 | p.Ala133Gln | 4448  | 1056  | 4.89 | 4.02 |       |      |       |       | -7.91E-02 | Neutral       |           | -7.91E-02     | Neutral       |
| 133 | p.Ala133Pro | 6362  | 1967  | 6.99 | 7.48 |       |      |       |       | -3.73E-01 | Neutral       |           | -3.73E-01     | Neutral       |
| 133 | p.Ala133Leu | 5900  | 1653  | 6.48 | 6.29 |       |      |       |       | -1.80E-01 | Neutral       |           | -1.80E-01     | Neutral       |
| 133 | p.Ala133Asp | 2399  | 878   | 2.63 | 3.34 |       |      |       |       | -7.43E+00 | Indeterminate |           | -7.43E+00     | Indeterminate |
| 133 | p.Ala133Glu | 4841  | 1739  | 5.32 | 6.62 |       |      |       |       | -2.21E+00 | Neutral       |           | -2.21E+00     | Neutral       |
| 133 | p.Ala133Ala | 4332  | 1340  | 4.76 | 5.10 |       |      |       |       | -1.06E+00 | Neutral       |           | -1.06E+00     | Neutral       |
| 133 | p.Ala133Gly | 4928  | 1597  | 5.41 | 6.08 |       |      |       |       | -1.09E+00 | Neutral       |           | -1.09E+00     | Neutral       |
| 133 | p.Ala133Val | 5234  | 1964  | 5.75 | 7.47 |       |      |       |       | -2.44E+00 | Neutral       |           | -2.44E+00     | Neutral       |
| 133 | p.Ala133Tyr | 5290  | 1737  | 5.81 | 6.61 |       |      |       |       | -1.01E+00 | Neutral       |           | -1.01E+00     | Neutral       |
| 133 | p.Ala133Cys | 2580  | 572   | 2.83 | 2.18 |       |      |       |       | -2.72E-01 | Neutral       |           | -2.72E-01     | Neutral       |
| 133 | p.Ala133Trp | 4232  | 1160  | 4.65 | 4.41 |       |      |       |       | -4.27E-01 | Neutral       |           | -4.27E-01     | Neutral       |
| 133 | p.Ala133Phe | 3655  | 1054  | 4.01 | 4.01 |       |      |       |       | -9.60E-01 | Neutral       |           | -9.60E-01     | Neutral       |
| 134 | p.Ala134Asn | 8503  | 16401 | 4.84 | 4.71 | 3843  | 656  | 4.51  | 4.15  | -5.88E-01 | Neutral       | -3.23E-02 | Neutral       | -1.04E-01     |
| 134 | p.Ala134Lys | 6884  | 14985 | 3.92 | 4.30 | 3773  | 681  | 4.43  | 4.31  | -2.24E+00 | Neutral       | -7.23E-02 | Neutral       | -9.30E-01     |
| 134 | p.Ala134Thr | 7442  | 13995 | 4.24 | 4.02 | 2573  | 670  | 3.02  | 4.24  | -6.87E-01 | Neutral       | -3.79E+00 | Neutral       | -2.44E+00     |
| 134 | p.Ala134Arg | 5325  | 12020 | 3.03 | 3.45 | 6217  | 601  | 7.30  | 3.80  | -4.25E+00 | Neutral       | -6.81E-09 | Neutral       | -2.27E+00     |
| 134 | p.Ala134Ser | 9157  | 17350 | 5.21 | 4.98 | 3396  | 901  | 3.99  | 5.70  | -4.07E-01 | Neutral       | -2.57E+00 | Neutral       | -1.36E+00     |
| 134 | p.Ala134Ile | 8079  | 14846 | 4.60 | 4.26 | 3017  | 641  | 3.54  | 4.06  | -4.49E-01 | Neutral       | -7.67E-01 | Neutral       | -3.34E-01     |
| 134 | p.Ala134Met | 7883  | 15439 | 4.49 | 4.43 | 3536  | 666  | 4.15  | 4.22  | -8.14E-01 | Neutral       | -1.53E-01 | Neutral       | -2.27E-01     |
| 134 | p.Ala134His | 9304  | 18154 | 5.29 | 5.21 | 4549  | 925  | 5.34  | 5.86  | -5.03E-01 | Neutral       | -1.41E-01 | Neutral       | -1.12E-01     |
| 134 | p.Ala134Gln | 8265  | 16273 | 4.70 | 4.67 | 3771  | 773  | 4.43  | 4.89  | -7.50E-01 | Neutral       | -2.94E-01 | Neutral       | -2.58E-01     |
| 134 | p.Ala134Pro | 5493  | 10521 | 3.13 | 3.02 | 3057  | 490  | 3.59  | 3.10  | -1.63E+00 | Neutral       | -3.85E-02 | Neutral       | -5.53E-01     |
| 134 | p.Ala134Leu | 9637  | 18558 | 5.48 | 5.33 | 4933  | 845  | 5.79  | 5.35  | -4.04E-01 | Neutral       | -1.01E-02 | Neutral       | -8.00E-02     |
| 134 | p.Ala134Asp | 10375 | 19782 | 5.90 | 5.68 | 4062  | 849  | 4.77  | 5.37  | -2.92E-01 | Neutral       | -2.79E-01 | Neutral       | -9.00E-02     |
| 134 | p.Ala134Glu | 11179 | 23452 | 6.36 | 6.74 | 7244  | 1068 | 8.51  | 6.76  | -5.55E-01 | Neutral       | -5.89E-05 | Neutral       | -8.56E-02     |
| 134 | p.Ala134Ala | 6807  | 13159 | 3.87 | 3.78 | 2772  | 598  | 3.26  | 3.79  | -1.06E+00 | Neutral       | -1.06E+00 | Neutral       | -8.18E-01     |
| 134 | p.Ala134Gly | 7599  | 15473 | 4.32 | 4.44 | 3125  | 574  | 3.67  | 3.63  | -1.18E+00 | Neutral       | -1.81E-01 | Neutral       | -4.05E-01     |
| 134 | p.Ala134Val | 11867 | 23859 | 6.75 | 6.85 | 5268  | 1204 | 6.19  | 7.62  | -3.17E-01 | Neutral       | -2.87E-01 | Neutral       | -9.96E-02     |
| 134 | p.Ala134Tyr | 11715 | 22207 | 6.67 | 6.38 | 4204  | 1130 | 4.94  | 7.15  | -1.83E-01 | Neutral       | -1.83E+00 | Neutral       | -7.53E-01     |
| 134 | p.Ala134Cys | 11760 | 21834 | 6.69 | 6.27 | 3466  | 958  | 4.07  | 6.06  | -1.44E+00 | Neutral       | -3.10E+00 | Neutral       | -1.54E+00     |
| 134 | p.Ala134Trp | 9783  | 23774 | 5.57 | 6.83 | 8758  | 932  | 10.28 | 5.90  | -2.15E+00 | Neutral       | -4.19E-09 | Neutral       | -8.35E-01     |
| 134 | p.Ala134Phe | 8664  | 16053 | 4.93 | 4.61 | 3592  | 634  | 4.22  | 4.01  | -3.92E-01 | Neutral       | -6.71E-02 | Neutral       | -6.06E-02     |
| 135 | p.Gly135Asn | 7098  | 1823  | 4.57 | 3.10 |       |      |       |       | -1.29E-02 | Neutral       |           |               | -1.29E-02     |
| 135 | p.Gly135Lys | 5037  | 2084  | 3.24 | 3.55 |       |      |       |       | -3.29E+00 | Neutral       |           |               | -3.29E+00     |
| 135 | p.Gly135Thr | 5864  | 2062  | 3.77 | 3.51 |       |      |       |       | -8.61E-01 | Neutral       |           |               | -8.61E-01     |
| 135 | p.Gly135Arg | 13028 | 3421  | 8.38 | 5.82 |       |      |       |       | -5.94E-04 | Neutral       |           |               | -5.94E-04     |
| 135 | p.Gly135Ser | 4979  | 1773  | 3.20 | 3.02 |       |      |       |       | -1.39E+00 | Neutral       |           |               | -1.39E+00     |
| 135 | p.Gly135Ile | 8051  | 3609  | 5.18 | 6.14 |       |      |       |       | -2.16E+00 | Neutral       |           |               | -2.16E+00     |
| 135 | p.Gly135Met | 12233 | 3835  | 7.87 | 8.23 |       |      |       |       | -2.87E-01 | Neutral       |           |               | -2.87E-01     |
| 135 | p.Gly135His | 11507 | 4705  | 7.40 | 8.01 |       |      |       |       | -4.74E-01 | Neutral       |           |               | -4.74E-01     |
| 135 | p.Gly135Gln | 6056  | 2112  | 3.90 | 3.59 |       |      |       |       | -7.44E-01 | Neutral       |           |               | -7.44E-01     |
| 135 | p.Gly135Pro | 8775  | 3358  | 5.65 | 5.71 |       |      |       |       | -5.81E-01 | Neutral       |           |               | -5.81E-01     |
| 135 | p.Gly135Leu | 8259  | 3502  | 5.31 | 5.96 |       |      |       |       | -1.45E+00 | Neutral       |           |               | -1.45E+00     |
| 135 | p.Gly135Asp | 5506  | 1975  | 3.54 | 3.36 |       |      |       |       | -1.16E+00 | Neutral       |           |               | -1.16E+00     |
| 135 | p.Gly135Glu | 4893  | 3812  | 3.15 | 6.49 |       |      |       |       | -3.14E-01 | Indeterminate |           |               | -3.10E-01     |
| 135 | p.Gly135Ala | 6693  | 2173  | 4.31 | 3.70 |       |      |       |       | -2.97E-01 | Neutral       |           |               | -2.97E-01     |
| 135 | p.Gly135Gly | 8277  | 3357  | 5.33 | 5.71 |       |      |       |       | -1.06E+00 | Neutral       |           |               | -1.06E+00     |
| 135 | p.Gly135Val | 5528  | 2052  | 3.56 | 3.49 |       |      |       |       | -1.45E+00 | Neutral       |           |               | -1.45E+00     |
| 135 | p.Gly135Tyr | 7744  | 2852  | 4.98 | 4.85 |       |      |       |       | -5.97E-01 | Neutral       |           |               | -5.97E-01     |
| 135 | p.Gly135Cys | 8671  | 2609  | 5.58 | 4.44 |       |      |       |       | -4.73E-02 | Neutral       |           |               | -4.73E-02     |
| 135 | p.Gly135Trp | 9281  | 3513  | 5.97 | 5.98 |       |      |       |       | -4.51E-01 | Neutral       |           |               | -4.51E-01     |
| 135 | p.Gly135Phe | 7947  | 3144  | 5.11 | 5.35 |       |      |       |       | -9.77E-01 | Neutral       |           |               | -9.77E-01     |
| 136 | p.Gly136Asn | 10420 | 5992  | 5.71 | 5.62 | 12915 | 6828 | 5.88  | 9.49  | -5.84E-01 | Neutral       | -9.84E+00 | Indeterminate | -7.38E+00     |
| 136 | p.Gly136Lys | 9133  | 4870  | 4.50 | 4.81 | 2631  | 483  | 3.66  | 4.57  | -4.44E-01 | Neutral       | -9.93E-02 | Neutral       | -8.23E-02     |
| 136 | p.Gly136Thr | 11568 | 6636  | 6.33 | 6.22 | 13564 | 1561 | 6.18  | 2.17  | -4.23E-01 | Neutral       | -2.85E-09 | Neutral       | -5.21E-02     |
| 136 | p.Gly136Arg | 13087 | 7645  | 7.17 | 7.17 | 15369 | 3820 | 7.00  | 5.31  | -3.43E-01 | Neutral       | -2.07E-02 | Neutral       | -3.94E-02     |
| 136 | p.Gly136Ser | 9479  | 5468  | 5.19 | 5.13 | 11411 | 5318 | 5.20  | 7.39  | -7.72E-01 | Neutral       | -7.10E+00 | Indeterminate | -5.18E+00     |
| 136 | p.Gly136Ile | 7498  | 4411  | 4.11 | 4.14 | 9506  | 1638 | 4.33  | 2.28  | -1.55E+00 | Neutral       | -6.45E-04 | Neutral       | -4.96E-01     |
| 136 | p.Gly136Met | 10463 | 6084  | 5.73 | 5.70 | 13373 | 2252 | 6.09  | 3.13  | -6.33E-01 | Neutral       | -4.03E-05 | Neutral       | -1.08E-01     |
| 136 | p.Gly136His | 10513 | 5586  | 5.76 | 5.24 | 11604 | 6173 | 5.28  | 8.58  | -2.78E-01 | Neutral       | -1.14E+01 | Indeterminate | -8.50E+00     |
| 136 | p.Gly136Gln | 8073  | 4302  | 4.42 | 4.03 | 9656  | 3063 | 4.40  | 4.26  | -6.27E-01 | Neutral       | -1.26E+00 | Neutral       | -6.79E-01     |
| 136 | p.Gly136Pro | 6566  | 4880  | 5.59 | 5.64 | 8140  | 4546 | 3.71  | 6.32  | -2.09E+00 | Neutral       | -1.93E-01 | Indeterminate | -1.06E+00     |
| 136 | p.Gly136Leu | 9190  | 5242  | 5.03 | 4.92 | 11122 | 5391 | 5.06  | 7.49  | -7.66E-01 | Neutral       | -8.57E+00 | Indeterminate | -6.43E+00     |
| 136 | p.Gly136Asp | 9243  | 5278  | 5.06 | 4.95 | 10964 | 7479 | 4.99  | 10.40 | -7.61E-01 | Neutral       | -2.56E+01 | Indeterminate | -2.20E+01     |
| 136 | p.Gly136Glu | 6896  | 3746  | 3.78 | 3.51 | 8983  | 1778 | 4.09  | 2.47  | -1.09E+00 | Neutral       | -9.84E-03 | Neutral       | -2.80E-01     |
| 136 | p.Gly136Ala | 8356  | 5198  | 4.58 | 4.87 | 9671  | 1125 | 4.40  | 1.56  | -1.76E+00 | Neutral       | -7.70E-08 | Neutral       | -6.07E-01     |
| 136 | p.Gly136Gly | 11614 | 7478  | 6.36 | 7.01 | 14031 | 4919 | 6.39  | 6.84  | -1.06E+00 | Neutral       | -1.06E+00 | Neutral       | -8.18E-01     |
| 136 | p.Gly136Val | 12033 | 7432  | 6.59 | 6.97 | 14744 | 2105 | 6.71  | 2.93  | -7.08E-01 | Neutral       | -4.00E-07 | Neutral       | -1.32E-01     |
| 136 | p.Gly136Tyr | 7640  | 5300  | 4.18 | 4.97 | 9352  | 2412 | 4.26  | 3.35  | -3.80E+00 | Neutral       | -2.43E-01 | Neutral       | -2.12E+00     |
| 136 | p.Gly136Cys | 7914  | 4580  | 4.23 | 4.29 | 9143  | 4462 | 4.16  | 6.20  | -2.23E+00 | Neutral       | -1.11E+01 | Indeterminate | -8.10E+00     |
| 136 | p.Gly136Trp | 4677  | 2955  | 2.56 | 2.77 | 5657  | 474  | 2.58  | 0.66  | -5.27E+00 | Neutral       | -1.15E-09 | Neutral       | -3.05E+00     |
| 136 | p.Gly136Phe | 8281  | 4565  | 4.53 | 4.28 | 9815  | 3962 | 4.47  | 5.51  | -7.69E-01 | Neutral       | -4.74E+00 | Neutral       | -3.24E+00     |
| 137 | p.Thr137Asn | 12637 | 7950  | 6.42 | 6.37 |       |      |       |       | -5.48E-01 | Neutral       |           |               | -5.48E-01     |
| 137 | p.Thr137Lys | 10056 | 5827  | 5.11 | 4.67 |       |      |       |       | -5.19E-01 | Neutral       |           |               | -5.19E-01     |
| 137 | p.Thr137Thr | 9153  | 5630  | 4.65 | 4.51 |       |      |       |       | -1.06E+00 | Neutral       |           |               | -1.06E+00     |
| 137 | p.Thr137Arg | 10802 | 7256  | 5.48 | 5.81 |       |      |       |       | -1.34E+00 | Neutral       |           |               | -1.34E+00     |
| 137 | p.Thr137Ser | 15695 | 10181 | 7.97 | 8.15 |       |      |       |       | -3.80E-01 | Neutral       |           |               | -3.80E-01     |
| 137 | p.Thr137Ile | 5926  | 3761  | 3.01 | 3.01 |       |      |       |       | -3.13E+00 | Neutral       |           |               | -3.13E+00     |
| 137 | p.Thr137Met | 15098 | 10222 | 7.67 | 8.18 |       |      |       |       | -6.18E-01 | Neutral       |           |               | -6.18E-01     |
| 137 | p.Thr137His | 7921  | 5006  | 4.02 | 4.01 |       |      |       |       | -1.76E+00 | Neutral       |           |               | -1.76E+00     |
| 137 | p.Thr137Gln | 2342  | 1107  | 1.19 | 0.89 |       |      |       |       | -3.36E+00 | Neutral       |           |               | -3.36E+00     |
| 137 | p.Thr137Pro | 6861  | 3500  | 3.48 | 2.80 |       |      |       |       |           |               |           |               |               |

|     |             |       |       |      |      |      |      |      |      |           |               |           |               |           |               |
|-----|-------------|-------|-------|------|------|------|------|------|------|-----------|---------------|-----------|---------------|-----------|---------------|
| 139 | p.Gly139Val | 15407 | 4203  | 6.40 | 5.68 | 6369 | 3174 | 6.77 | 5.97 | -2.39E-01 | Neutral       | -8.09E-01 | Neutral       | -2.60E-01 | Neutral       |
| 139 | p.Gly139Tyr | 10886 | 4620  | 4.52 | 6.24 | 4241 | 2748 | 4.51 | 5.17 | -8.00E+00 | Indeterminate | -7.33E+00 | Indeterminate | -1.18E+01 | Indeterminate |
| 139 | p.Gly139Cys | 12796 | 3369  | 5.32 | 4.55 | 5017 | 2479 | 5.34 | 4.66 | -3.09E-01 | Neutral       | -1.35E+00 | Neutral       | -5.54E-01 | Neutral       |
| 139 | p.Gly139Thr | 12302 | 3446  | 5.11 | 4.66 | 4799 | 2716 | 5.10 | 5.11 | -6.04E-01 | Neutral       | -3.28E+00 | Neutral       | -2.00E+00 | Neutral       |
| 139 | p.Gly139Phe | 13311 | 4715  | 5.53 | 6.37 | 5200 | 3243 | 5.53 | 6.10 | -2.52E+00 | Neutral       | -4.64E+00 | Neutral       | -4.58E+00 | Neutral       |
| 140 | p.Ser140Asn | 10552 | 7922  | 5.17 | 5.24 |      |      |      |      | -7.53E-01 | Neutral       |           |               | -7.53E-01 | Neutral       |
| 140 | p.Ser140Lys | 11164 | 7762  | 5.47 | 5.14 |      |      |      |      | -3.30E-01 | Neutral       |           |               | -3.30E-01 | Neutral       |
| 140 | p.Ser140Thr | 12855 | 9304  | 6.30 | 6.16 |      |      |      |      | -3.09E-01 | Neutral       |           |               | -3.09E-01 | Neutral       |
| 140 | p.Ser140Arg | 7945  | 6865  | 3.89 | 4.54 |      |      |      |      | -3.36E+00 | Neutral       |           |               | -3.36E+00 | Neutral       |
| 140 | p.Ser140Ser | 8620  | 6334  | 4.23 | 4.19 |      |      |      |      | -1.06E+00 | Neutral       |           |               | -1.06E+00 | Neutral       |
| 140 | p.Ser140Ile | 15602 | 10874 | 7.65 | 7.20 |      |      |      |      | -1.05E-01 | Neutral       |           |               | -1.05E-01 | Neutral       |
| 140 | p.Ser140Met | 7484  | 5193  | 3.67 | 3.44 |      |      |      |      | -9.84E-01 | Neutral       |           |               | -9.84E-01 | Neutral       |
| 140 | p.Ser140His | 9812  | 7506  | 4.81 | 4.97 |      |      |      |      | -1.04E+00 | Neutral       |           |               | -1.04E+00 | Neutral       |
| 140 | p.Ser140Gln | 11521 | 8353  | 5.65 | 5.53 |      |      |      |      | -4.40E-01 | Neutral       |           |               | -4.40E-01 | Neutral       |
| 140 | p.Ser140Pro | 5355  | 4736  | 2.62 | 3.13 |      |      |      |      | -6.82E+00 | Indeterminate |           |               | -6.82E+00 | Indeterminate |
| 140 | p.Ser140Leu | 9344  | 6183  | 4.58 | 4.09 |      |      |      |      | -3.61E-01 | Neutral       |           |               | -3.61E-01 | Neutral       |
| 140 | p.Ser140Asp | 15150 | 10921 | 7.43 | 7.23 |      |      |      |      | -1.71E-01 | Neutral       |           |               | -1.71E-01 | Neutral       |
| 140 | p.Ser140Glu | 9632  | 6353  | 4.72 | 4.20 |      |      |      |      | -3.18E-01 | Neutral       |           |               | -3.18E-01 | Neutral       |
| 140 | p.Ser140Gly | 4610  | 3616  | 2.26 | 2.39 |      |      |      |      | -5.04E+00 | Indeterminate |           |               | -5.04E+00 | Indeterminate |
| 140 | p.Ser140Val | 6200  | 5842  | 3.04 | 3.87 |      |      |      |      | -7.24E+00 | Indeterminate |           |               | -7.24E+00 | Indeterminate |
| 140 | p.Ser140Tyr | 17043 | 12142 | 8.35 | 8.04 |      |      |      |      | -9.60E-02 | Neutral       |           |               | -9.60E-02 | Neutral       |
| 140 | p.Ser140Cys | 15829 | 12798 | 7.76 | 8.47 |      |      |      |      | -4.54E-01 | Neutral       |           |               | -4.54E-01 | Neutral       |
| 140 | p.Ser140Thr | 11151 | 8478  | 5.47 | 5.61 |      |      |      |      | -7.20E-01 | Neutral       |           |               | -7.20E-01 | Neutral       |
| 140 | p.Ser140Trp | 7713  | 5562  | 3.78 | 3.68 |      |      |      |      | -1.21E+00 | Neutral       |           |               | -1.21E+00 | Neutral       |
| 140 | p.Ser140Phe | 6438  | 4352  | 3.16 | 2.88 |      |      |      |      | -1.17E+00 | Neutral       |           |               | -1.17E+00 | Neutral       |
| 141 | p.Asn141Asn | 9534  | 7176  | 4.94 | 5.44 |      |      |      |      | -1.06E+00 | Neutral       |           |               | -1.06E+00 | Neutral       |
| 141 | p.Asn141Lys | 6445  | 3767  | 3.34 | 2.86 |      |      |      |      | -3.91E-01 | Neutral       |           |               | -3.91E-01 | Neutral       |
| 141 | p.Asn141Thr | 5628  | 4142  | 2.91 | 3.14 |      |      |      |      | -2.77E-01 | Neutral       |           |               | -2.77E-01 | Neutral       |
| 141 | p.Asn141Arg | 9129  | 6690  | 4.73 | 5.07 |      |      |      |      | -9.71E-01 | Neutral       |           |               | -9.71E-01 | Neutral       |
| 141 | p.Asn141Ser | 9765  | 6185  | 5.06 | 4.69 |      |      |      |      | -2.24E-01 | Neutral       |           |               | -2.24E-01 | Neutral       |
| 141 | p.Asn141Ile | 11867 | 8445  | 6.14 | 6.41 |      |      |      |      | -3.71E-01 | Neutral       |           |               | -3.71E-01 | Neutral       |
| 141 | p.Asn141Met | 11856 | 8168  | 6.14 | 6.20 |      |      |      |      | -2.73E-01 | Neutral       |           |               | -2.73E-01 | Neutral       |
| 141 | p.Asn141His | 4415  | 2868  | 2.29 | 2.18 |      |      |      |      | -2.15E+00 | Neutral       |           |               | -2.15E+00 | Neutral       |
| 141 | p.Asn141Gln | 10967 | 8321  | 5.68 | 6.31 |      |      |      |      | -7.96E-01 | Neutral       |           |               | -7.96E-01 | Neutral       |
| 141 | p.Asn141Pro | 6338  | 4134  | 3.28 | 3.14 |      |      |      |      | -1.00E+00 | Neutral       |           |               | -1.00E+00 | Neutral       |
| 141 | p.Asn141Leu | 11622 | 4486  | 6.02 | 5.68 |      |      |      |      | -1.45E-01 | Neutral       |           |               | -1.45E-01 | Neutral       |
| 141 | p.Asn141Asp | 13047 | 9029  | 6.76 | 6.85 |      |      |      |      | -2.07E-01 | Neutral       |           |               | -2.07E-01 | Neutral       |
| 141 | p.Asn141Glu | 7938  | 5777  | 4.11 | 4.38 |      |      |      |      | -1.28E+00 | Neutral       |           |               | -1.28E+00 | Neutral       |
| 141 | p.Asn141Ala | 12198 | 8306  | 6.32 | 6.30 |      |      |      |      | -2.20E-01 | Neutral       |           |               | -2.20E-01 | Neutral       |
| 141 | p.Asn141Gly | 9905  | 6558  | 5.13 | 4.97 |      |      |      |      | -3.31E-01 | Neutral       |           |               | -3.31E-01 | Neutral       |
| 141 | p.Asn141Val | 15454 | 9860  | 8.00 | 7.48 |      |      |      |      | -4.06E-02 | Neutral       |           |               | -4.06E-02 | Neutral       |
| 141 | p.Asn141Tyr | 6746  | 4426  | 3.49 | 3.36 |      |      |      |      | -9.00E-01 | Neutral       |           |               | -9.00E-01 | Neutral       |
| 141 | p.Asn141Cys | 4124  | 2702  | 2.14 | 2.05 |      |      |      |      | -2.57E+00 | Neutral       |           |               | -2.57E+00 | Neutral       |
| 141 | p.Asn141Trp | 15020 | 9827  | 7.78 | 7.45 |      |      |      |      | -6.36E-02 | Neutral       |           |               | -6.36E-02 | Neutral       |
| 141 | p.Asn141Phe | 11136 | 7974  | 5.77 | 6.05 |      |      |      |      | -4.74E-01 | Neutral       |           |               | -4.74E-01 | Neutral       |
| 142 | p.His142Asn | 8383  | 1168  | 4.70 | 4.66 |      |      |      |      | -1.78E-04 | Neutral       |           |               | -1.78E-04 | Neutral       |
| 142 | p.His142Lys | 10971 | 1665  | 6.15 | 6.65 |      |      |      |      | -1.65E-04 | Neutral       |           |               | -1.65E-04 | Neutral       |
| 142 | p.His142Thr | 8686  | 1345  | 4.87 | 5.37 |      |      |      |      | -1.10E-03 | Neutral       |           |               | -1.10E-03 | Neutral       |
| 142 | p.His142Arg | 10575 | 1237  | 5.93 | 4.94 |      |      |      |      | -6.01E-07 | Neutral       |           |               | -6.01E-07 | Neutral       |
| 142 | p.His142Ser | 7833  | 1082  | 4.39 | 4.32 |      |      |      |      | -2.36E-04 | Neutral       |           |               | -2.36E-04 | Neutral       |
| 142 | p.His142Ile | 11025 | 1519  | 6.18 | 6.06 |      |      |      |      | -2.03E+00 | Neutral       |           |               | -2.03E+00 | Neutral       |
| 142 | p.His142Met | 7777  | 1104  | 4.36 | 4.41 |      |      |      |      | -4.24E-04 | Neutral       |           |               | -4.24E-04 | Neutral       |
| 142 | p.His142His | 1320  | 190   | 0.74 | 0.76 |      |      |      |      | -1.06E+00 | Neutral       |           |               | -1.06E+00 | Neutral       |
| 142 | p.His142Gln | 6699  | 1050  | 3.76 | 4.19 |      |      |      |      | -6.05E-03 | Neutral       |           |               | -6.05E-03 | Neutral       |
| 142 | p.His142Pro | 5548  | 762   | 3.11 | 3.04 |      |      |      |      | -1.85E-03 | Neutral       |           |               | -1.85E-03 | Neutral       |
| 142 | p.His142Leu | 15858 | 2076  | 8.89 | 8.29 |      |      |      |      | -3.48E-07 | Neutral       |           |               | -3.48E-07 | Neutral       |
| 142 | p.His142Asp | 8253  | 1295  | 4.63 | 5.17 |      |      |      |      | -1.89E-03 | Neutral       |           |               | -1.89E-03 | Neutral       |
| 142 | p.His142Glu | 10412 | 1458  | 5.84 | 5.82 |      |      |      |      | -4.39E-05 | Neutral       |           |               | -4.39E-05 | Neutral       |
| 142 | p.His142Ala | 12203 | 1691  | 6.61 | 6.76 |      |      |      |      | -1.11E-01 | Neutral       |           |               | -1.11E-01 | Neutral       |
| 142 | p.His142Gly | 7160  | 966   | 4.01 | 3.86 |      |      |      |      | -2.68E-04 | Neutral       |           |               | -2.68E-04 | Neutral       |
| 142 | p.His142Val | 11560 | 1684  | 6.48 | 6.72 |      |      |      |      | -4.87E-05 | Neutral       |           |               | -4.87E-05 | Neutral       |
| 142 | p.His142Tyr | 8206  | 1063  | 4.60 | 4.24 |      |      |      |      | -4.50E-05 | Neutral       |           |               | -4.50E-05 | Neutral       |
| 142 | p.His142Cys | 9000  | 1249  | 5.05 | 4.99 |      |      |      |      | -1.01E-04 | Neutral       |           |               | -1.01E-04 | Neutral       |
| 142 | p.His142Trp | 9332  | 1224  | 5.23 | 4.89 |      |      |      |      | -2.33E-05 | Neutral       |           |               | -2.33E-05 | Neutral       |
| 142 | p.His142Phe | 7571  | 1225  | 4.24 | 4.89 |      |      |      |      | -5.23E-03 | Neutral       |           |               | -5.23E-03 | Neutral       |
| 143 | p.Ala143Asn | 10595 | 21434 | 4.99 | 5.07 |      |      |      |      | -1.04E+00 | Neutral       |           |               | -1.04E+00 | Neutral       |
| 143 | p.Ala143Lys | 11917 | 23232 | 6.61 | 6.49 |      |      |      |      | -5.77E-01 | Neutral       |           |               | -5.77E-01 | Neutral       |
| 143 | p.Ala143Thr | 12320 | 23747 | 5.80 | 5.61 |      |      |      |      | -4.77E-01 | Neutral       |           |               | -4.77E-01 | Neutral       |
| 143 | p.Ala143Arg | 10547 | 20563 | 4.96 | 4.86 |      |      |      |      | -8.01E-01 | Neutral       |           |               | -8.01E-01 | Neutral       |
| 143 | p.Ala143Ser | 9145  | 17169 | 4.30 | 4.06 |      |      |      |      | -8.62E-01 | Neutral       |           |               | -8.62E-01 | Neutral       |
| 143 | p.Ala143Ile | 9506  | 17634 | 4.47 | 4.17 |      |      |      |      | -7.11E-01 | Neutral       |           |               | -7.11E-01 | Neutral       |
| 143 | p.Ala143Met | 10605 | 21003 | 4.99 | 4.96 |      |      |      |      | -8.91E-01 | Neutral       |           |               | -8.91E-01 | Neutral       |
| 143 | p.Ala143His | 9550  | 18973 | 4.49 | 4.48 |      |      |      |      | -1.17E+00 | Neutral       |           |               | -1.17E+00 | Neutral       |
| 143 | p.Ala143Gln | 11085 | 22354 | 5.22 | 5.28 |      |      |      |      | -9.13E-01 | Neutral       |           |               | -9.13E-01 | Neutral       |
| 143 | p.Ala143Pro | 8704  | 17930 | 4.10 | 4.24 |      |      |      |      | -1.82E+00 | Neutral       |           |               | -1.82E+00 | Neutral       |
| 143 | p.Ala143Leu | 9306  | 17759 | 4.38 | 4.20 |      |      |      |      | -9.33E-01 | Neutral       |           |               | -9.33E-01 | Neutral       |
| 143 | p.Ala143Asp | 8557  | 15731 | 4.03 | 3.72 |      |      |      |      | -8.69E-01 | Neutral       |           |               | -8.69E-01 | Neutral       |
| 143 | p.Ala143Glu | 11690 | 23121 | 5.50 | 5.47 |      |      |      |      | -6.85E-01 | Neutral       |           |               | -6.85E-01 | Neutral       |
| 143 | p.Ala143Ala | 10390 | 20931 | 4.89 | 4.95 |      |      |      |      | -1.06E+00 | Neutral       |           |               | -1.06E+00 | Neutral       |
| 143 | p.Ala143Gly | 12401 | 25612 | 5.84 | 6.05 |      |      |      |      | -8.25E-01 | Neutral       |           |               | -8.25E-01 | Neutral       |
| 143 | p.Ala143Val | 11134 | 21640 | 5.24 | 5.12 |      |      |      |      | -6.78E-01 | Neutral       |           |               | -6.78E-01 | Neutral       |
| 143 | p.Ala143Tyr | 10660 | 21796 | 5.02 | 5.15 |      |      |      |      | -1.11E+00 | Neutral       |           |               | -1.11E+00 | Neutral       |
| 143 | p.Ala143Cys | 10965 | 22961 | 5.16 | 5.43 |      |      |      |      | -1.23E+00 | Neutral       |           |               | -1.23E+00 | Neutral       |
| 143 | p.Ala143Trp | 11086 | 24426 | 5.22 | 5.77 |      |      |      |      | -1.68E+00 | Neutral       |           |               | -1.68E+00 | Neutral       |
| 143 | p.Ala143Phe | 12322 | 25053 | 5.80 | 5.92 |      |      |      |      | -7.43E-01 | Neutral       |           |               | -7.43E-01 | Neutral       |
| 144 | p.Arg144Asn | 19759 | 3661  | 6.06 | 5.83 |      |      |      |      | -1.14E-01 | Neutral       |           |               | -1.14E-01 | Neutral       |
| 144 | p.Arg144Lys | 11748 | 2225  | 3.60 | 3.54 |      |      |      |      | -7.41E-01 | Neutral       |           |               | -7.41E-01 | Neutral       |
| 144 | p.Arg144Thr | 15043 | 2830  | 4.61 | 4.50 |      |      |      |      | -3.45E-01 | Neutral       |           |               | -3.45E-01 | Neutral       |
| 144 | p.Arg144Arg | 13943 | 2932  | 4.28 | 4.67 |      |      |      |      | -1.06E+00 | Neutral       |           |               | -1.06E+00 | Neutral       |
| 144 | p.Arg144Ser | 13559 | 2514  | 4.16 | 4.00 |      |      |      |      | -4.14E-01 | Neutral       |           |               | -4.14E-01 | Neutral       |
| 144 | p.Arg144Ile | 12325 | 2572  | 4.08 | 4.09 |      |      |      |      | -6.69E-01 | Neutral       |           |               | -6.69E-01 | Neutral       |
| 144 | p.Arg144Met | 14812 | 2776  | 4.54 | 4.42 |      |      |      |      | -3.49E-01 | Neutral       |           |               | -3.49E-01 | Neutral       |
| 144 | p.Arg144His | 13721 | 2644  | 4.21 | 4.21 |      |      |      |      | -5.60E-01 | Neutral       |           |               | -5.60E-01 | Neutral       |
| 144 | p.Arg144Gln | 16857 | 3371  | 5.17 | 5.37 |      |      |      |      | -4.27E-01 | Neutral       |           |               | -4.27E-01 | Neutral       |
| 144 | p.Arg144Pro | 9345  | 1766  | 2.87 | 2.81 |      |      |      |      | -1.27E+00 | Neutral       |           |               | -1.27E+00 | Neutral       |
| 144 | p.Arg144Leu | 23232 | 4702  | 7.13 | 7.48 |      |      |      |      | -1.68E-01 | Neutral       |           |               | -1.68E-01 | Neutral       |
| 144 | p.Arg144Asp | 13837 | 2604  | 4.24 | 4.15 |      |      |      |      | -4.45E-01 | Neutral       |           |               | -4.45E-01 | Neutral       |
| 144 | p.Arg144Glu | 16608 | 3337  | 5.09 | 5.31 |      |      |      |      | -4.65E-01 | Neutral       |           |               | -4.65E-01 | Neutral       |
| 144 | p.Arg144Ala | 17489 | 3491  | 5.36 | 5.56 |      |      |      |      | -3.75E-01 | Neutral       |           |               | -3.75E-01 |               |

|     |             |       |      |      |      |           |               |           |               |
|-----|-------------|-------|------|------|------|-----------|---------------|-----------|---------------|
| 146 | p.Asp146Gly | 10422 | 2344 | 4.86 | 4.47 | -7.93E-01 | Neutral       | -7.93E-01 | Neutral       |
| 146 | p.Asp146Val | 10670 | 2408 | 4.97 | 4.59 | -7.66E-01 | Neutral       | -7.66E-01 | Neutral       |
| 146 | p.Asp146Tyr | 8216  | 2149 | 3.83 | 4.09 | -3.39E+00 | Neutral       | -3.39E+00 | Neutral       |
| 146 | p.Asp146Cys | 8017  | 2125 | 3.74 | 4.05 | -3.78E+00 | Neutral       | -3.78E+00 | Neutral       |
| 146 | p.Asp146Trp | 11676 | 2611 | 5.44 | 4.97 | -5.58E-01 | Neutral       | -5.58E-01 | Neutral       |
| 146 | p.Asp146Phe | 12657 | 3420 | 5.90 | 6.52 | -1.81E+00 | Neutral       | -1.81E+00 | Neutral       |
| 147 | p.Ala147Asn | 9204  | 2354 | 5.80 | 6.05 | -9.33E-01 | Neutral       | -9.33E-01 | Neutral       |
| 147 | p.Ala147Lys | 5763  | 1279 | 3.63 | 3.29 | -1.03E+00 | Neutral       | -1.03E+00 | Neutral       |
| 147 | p.Ala147Thr | 8653  | 2165 | 5.45 | 5.56 | -9.22E-01 | Neutral       | -9.22E-01 | Neutral       |
| 147 | p.Ala147Arg | 9200  | 2032 | 5.79 | 5.22 | -2.64E-01 | Neutral       | -2.64E-01 | Neutral       |
| 147 | p.Ala147Ser | 4918  | 1083 | 3.10 | 2.78 | -1.41E+00 | Neutral       | -1.41E+00 | Neutral       |
| 147 | p.Ala147Ile | 12599 | 3435 | 7.93 | 8.82 | -6.82E-01 | Neutral       | -6.82E-01 | Neutral       |
| 147 | p.Ala147Met | 8368  | 2192 | 5.27 | 5.63 | -1.38E+00 | Neutral       | -1.38E+00 | Neutral       |
| 147 | p.Ala147His | 8991  | 1948 | 5.66 | 5.00 | -2.35E-01 | Neutral       | -2.35E-01 | Neutral       |
| 147 | p.Ala147Gln | 8751  | 3013 | 5.51 | 7.74 | -5.59E+00 | Neutral       | -5.59E+00 | Neutral       |
| 147 | p.Ala147Pro | 4007  | 861  | 2.52 | 2.21 | -1.86E+00 | Neutral       | -1.86E+00 | Neutral       |
| 147 | p.Ala147Leu | 7838  | 2032 | 4.94 | 5.22 | -1.49E+00 | Neutral       | -1.49E+00 | Neutral       |
| 147 | p.Ala147Asp | 7218  | 1972 | 4.55 | 5.07 | -2.43E+00 | Neutral       | -2.43E+00 | Neutral       |
| 147 | p.Ala147Ala | 10401 | 2371 | 6.55 | 6.09 | -2.41E-01 | Neutral       | -2.41E-01 | Neutral       |
| 147 | p.Ala147Ala | 7509  | 1827 | 4.73 | 4.69 | -1.06E+00 | Neutral       | -1.06E+00 | Neutral       |
| 147 | p.Ala147Gly | 7263  | 1725 | 4.57 | 4.43 | -9.65E-01 | Neutral       | -9.65E-01 | Neutral       |
| 147 | p.Ala147Val | 6913  | 1751 | 4.35 | 4.50 | -1.68E+00 | Neutral       | -1.68E+00 | Neutral       |
| 147 | p.Ala147Tyr | 7642  | 1659 | 4.81 | 4.26 | -4.02E-01 | Neutral       | -4.02E-01 | Neutral       |
| 147 | p.Ala147Cys | 6487  | 1451 | 4.08 | 3.73 | -8.15E-01 | Neutral       | -8.15E-01 | Neutral       |
| 147 | p.Ala147Trp | 7819  | 1773 | 4.92 | 4.55 | -5.51E-01 | Neutral       | -5.51E-01 | Neutral       |
| 147 | p.Ala147Phe | 9259  | 2010 | 5.83 | 5.16 | -2.17E-01 | Neutral       | -2.17E-01 | Neutral       |
| 148 | p.Ala148Asn | 5500  | 1127 | 5.24 | 5.45 | -6.43E+00 | Indeterminate | -6.43E+00 | Indeterminate |
| 148 | p.Ala148Lys | 5191  | 1606 | 4.94 | 7.77 | -2.64E-01 | Indeterminate | -2.64E-01 | Indeterminate |
| 148 | p.Ala148Thr | 4478  | 636  | 4.27 | 3.08 | -1.32E+00 | Neutral       | -1.32E+00 | Neutral       |
| 148 | p.Ala148Arg | 5505  | 1227 | 5.24 | 5.94 | -8.95E+00 | Indeterminate | -8.95E+00 | Indeterminate |
| 148 | p.Ala148Ser | 5604  | 937  | 5.34 | 4.53 | -2.30E+00 | Neutral       | -2.30E+00 | Neutral       |
| 148 | p.Ala148Ile | 5331  | 951  | 5.08 | 4.60 | -3.57E+00 | Neutral       | -3.57E+00 | Neutral       |
| 148 | p.Ala148Met | 5054  | 1202 | 4.81 | 5.81 | -1.25E+01 | Indeterminate | -1.25E+01 | Indeterminate |
| 148 | p.Ala148His | 4976  | 975  | 4.74 | 4.72 | -6.12E+00 | Indeterminate | -6.12E+00 | Indeterminate |
| 148 | p.Ala148Gln | 4007  | 815  | 3.82 | 3.98 | -9.43E+00 | Indeterminate | -9.43E+00 | Indeterminate |
| 148 | p.Ala148Pro | 5297  | 975  | 5.05 | 4.72 | -4.20E+00 | Neutral       | -4.20E+00 | Neutral       |
| 148 | p.Ala148Leu | 5329  | 998  | 5.08 | 4.83 | -4.52E+00 | Neutral       | -4.52E+00 | Neutral       |
| 148 | p.Ala148Asp | 7534  | 1486 | 7.18 | 7.19 | -3.31E+00 | Neutral       | -3.31E+00 | Neutral       |
| 148 | p.Ala148Glu | 5527  | 1188 | 5.26 | 5.75 | -7.75E+00 | Indeterminate | -7.75E+00 | Indeterminate |
| 148 | p.Ala148Ala | 6364  | 985  | 6.06 | 4.76 | -1.06E+00 | Neutral       | -1.06E+00 | Neutral       |
| 148 | p.Ala148Gly | 5784  | 901  | 5.51 | 4.36 | -1.38E+00 | Neutral       | -1.38E+00 | Neutral       |
| 148 | p.Ala148Val | 5833  | 1397 | 5.56 | 6.76 | -1.08E+01 | Indeterminate | -1.08E+01 | Indeterminate |
| 148 | p.Ala148Tyr | 5919  | 862  | 5.64 | 4.17 | -8.07E-01 | Neutral       | -8.07E-01 | Neutral       |
| 148 | p.Ala148Cys | 4878  | 497  | 4.65 | 2.40 | -3.84E-02 | Neutral       | -3.84E-02 | Neutral       |
| 148 | p.Ala148Trp | 1553  | 307  | 1.48 | 1.49 | -2.33E+01 | Indeterminate | -2.33E+01 | Indeterminate |
| 148 | p.Ala148Phe | 5316  | 1600 | 5.06 | 7.74 | -2.40E+01 | Indeterminate | -2.40E+01 | Indeterminate |
| 149 | p.Glu149Asn | 11526 | 2539 | 5.21 | 4.39 | -2.13E-01 | Neutral       | -2.13E-01 | Neutral       |
| 149 | p.Glu149Lys | 12918 | 3636 | 5.84 | 6.28 | -1.24E+00 | Neutral       | -1.24E+00 | Neutral       |
| 149 | p.Glu149Thr | 8983  | 2667 | 4.06 | 4.61 | -3.47E+00 | Neutral       | -3.47E+00 | Neutral       |
| 149 | p.Glu149Arg | 11953 | 2775 | 5.40 | 4.79 | -3.18E-01 | Neutral       | -3.18E-01 | Neutral       |
| 149 | p.Glu149Ser | 7632  | 2377 | 3.45 | 4.11 | -5.62E+00 | Neutral       | -5.62E+00 | Neutral       |
| 149 | p.Glu149Ile | 9830  | 2957 | 4.44 | 5.11 | -3.18E+00 | Neutral       | -3.18E+00 | Neutral       |
| 149 | p.Glu149Met | 8397  | 1815 | 3.79 | 3.14 | -4.83E-01 | Neutral       | -4.83E-01 | Neutral       |
| 149 | p.Glu149His | 9745  | 2478 | 4.40 | 4.28 | -1.17E+00 | Neutral       | -1.17E+00 | Neutral       |
| 149 | p.Glu149Gln | 14693 | 3524 | 6.64 | 6.09 | -2.22E-01 | Neutral       | -2.22E-01 | Neutral       |
| 149 | p.Glu149Pro | 18087 | 4495 | 8.17 | 7.77 | -1.56E-01 | Neutral       | -1.56E-01 | Neutral       |
| 149 | p.Glu149Leu | 19825 | 4976 | 8.96 | 8.60 | -1.24E-01 | Neutral       | -1.24E-01 | Neutral       |
| 149 | p.Glu149Asp | 6538  | 1538 | 2.95 | 2.66 | -1.68E+00 | Neutral       | -1.68E+00 | Neutral       |
| 149 | p.Glu149Glu | 12702 | 3479 | 5.74 | 6.01 | -1.06E+00 | Neutral       | -1.06E+00 | Neutral       |
| 149 | p.Glu149Ala | 9398  | 2578 | 4.25 | 4.45 | -2.07E+00 | Neutral       | -2.07E+00 | Neutral       |
| 149 | p.Glu149Gly | 10131 | 2730 | 4.58 | 4.72 | -1.58E+00 | Neutral       | -1.58E+00 | Neutral       |
| 149 | p.Glu149Val | 11244 | 3057 | 5.08 | 5.28 | -1.34E+00 | Neutral       | -1.34E+00 | Neutral       |
| 149 | p.Glu149Tyr | 13264 | 3705 | 5.99 | 6.40 | -1.10E+00 | Neutral       | -1.10E+00 | Neutral       |
| 149 | p.Glu149Cys | 7128  | 1678 | 3.22 | 2.90 | -1.40E+00 | Neutral       | -1.40E+00 | Neutral       |
| 149 | p.Glu149Trp | 10289 | 2823 | 4.65 | 4.88 | -1.72E+00 | Neutral       | -1.72E+00 | Neutral       |
| 149 | p.Glu149Phe | 7043  | 2050 | 3.18 | 3.54 | -4.67E+00 | Neutral       | -4.67E+00 | Neutral       |
| 150 | p.Gly150Asn | 7889  | 2318 | 5.48 | 5.15 | -2.17E-01 | Neutral       | -2.17E-01 | Neutral       |
| 150 | p.Gly150Lys | 5103  | 1727 | 3.55 | 3.84 | -2.08E+00 | Neutral       | -2.08E+00 | Neutral       |
| 150 | p.Gly150Thr | 5460  | 1724 | 3.79 | 3.83 | -1.15E+00 | Neutral       | -1.15E+00 | Neutral       |
| 150 | p.Gly150Arg | 10512 | 3556 | 7.31 | 7.91 | -3.40E-01 | Neutral       | -3.40E-01 | Neutral       |
| 150 | p.Gly150Ser | 5701  | 1862 | 3.96 | 4.14 | -1.31E+00 | Neutral       | -1.31E+00 | Neutral       |
| 150 | p.Gly150Ile | 9376  | 2842 | 6.52 | 6.32 | -1.65E-01 | Neutral       | -1.65E-01 | Neutral       |
| 150 | p.Gly150Met | 8873  | 3128 | 6.17 | 6.95 | -7.85E-01 | Neutral       | -7.85E-01 | Neutral       |
| 150 | p.Gly150His | 6463  | 2210 | 4.49 | 4.91 | -1.35E+00 | Neutral       | -1.35E+00 | Neutral       |
| 150 | p.Gly150Gln | 4578  | 1412 | 5.18 | 3.14 | -1.46E+00 | Neutral       | -1.46E+00 | Neutral       |
| 150 | p.Gly150Pro | 7208  | 2368 | 5.01 | 5.26 | -7.75E-01 | Neutral       | -7.75E-01 | Neutral       |
| 150 | p.Gly150Leu | 6458  | 1932 | 4.49 | 4.30 | -4.84E-01 | Neutral       | -4.84E-01 | Neutral       |
| 150 | p.Gly150Asp | 4629  | 1476 | 3.22 | 3.28 | -1.76E+00 | Neutral       | -1.76E+00 | Neutral       |
| 150 | p.Gly150Glu | 7971  | 2314 | 5.54 | 5.14 | -1.85E-01 | Neutral       | -1.85E-01 | Neutral       |
| 150 | p.Gly150Ala | 8197  | 2338 | 5.70 | 5.20 | -1.38E-01 | Neutral       | -1.38E-01 | Neutral       |
| 150 | p.Gly150Gly | 6435  | 2123 | 4.47 | 4.72 | -1.06E+00 | Neutral       | -1.06E+00 | Neutral       |
| 150 | p.Gly150Val | 6648  | 2121 | 4.62 | 4.72 | -7.61E-01 | Neutral       | -7.61E-01 | Neutral       |
| 150 | p.Gly150Tyr | 9875  | 2976 | 6.86 | 6.62 | -1.28E-01 | Neutral       | -1.28E-01 | Neutral       |
| 150 | p.Gly150Cys | 9027  | 2296 | 6.27 | 5.10 | -2.12E-02 | Neutral       | -2.12E-02 | Neutral       |
| 150 | p.Gly150Trp | 6653  | 2013 | 4.62 | 4.48 | -4.90E-01 | Neutral       | -4.90E-01 | Neutral       |
| 150 | p.Gly150Phe | 6845  | 2245 | 4.76 | 4.99 | -8.74E-01 | Neutral       | -8.74E-01 | Neutral       |
| 151 | p.Pro151Asn | 7141  | 5866 | 5.72 | 6.09 | -7.22E-01 | Neutral       | -7.22E-01 | Neutral       |
| 151 | p.Pro151Lys | 10023 | 7533 | 8.03 | 7.83 | -1.02E-01 | Neutral       | -1.02E-01 | Neutral       |
| 151 | p.Pro151Thr | 4705  | 3885 | 3.77 | 4.04 | -1.96E+00 | Neutral       | -1.96E+00 | Neutral       |
| 151 | p.Pro151Arg | 4020  | 2684 | 3.22 | 2.79 | -6.32E-01 | Neutral       | -6.32E-01 | Neutral       |
| 151 | p.Pro151Ser | 1092  | 898  | 0.87 | 0.93 | -1.55E+01 | Indeterminate | -1.55E+01 | Indeterminate |
| 151 | p.Pro151Ile | 7374  | 5843 | 5.91 | 6.07 | -4.90E-01 | Neutral       | -4.90E-01 | Neutral       |
| 151 | p.Pro151Met | 10441 | 7670 | 8.36 | 7.97 | -6.54E-02 | Neutral       | -6.54E-02 | Neutral       |
| 151 | p.Pro151His | 7271  | 6167 | 5.82 | 6.41 | -8.83E-01 | Neutral       | -8.83E-01 | Neutral       |
| 151 | p.Pro151Gln | 7412  | 5338 | 5.94 | 5.55 | -1.93E-01 | Neutral       | -1.93E-01 | Neutral       |
| 151 | p.Pro151Pro | 5643  | 4511 | 4.52 | 4.69 | -1.06E+00 | Neutral       | -1.06E+00 | Neutral       |
| 151 | p.Pro151Leu | 3192  | 2581 | 2.56 | 2.68 | -3.56E+00 | Neutral       | -3.56E+00 | Neutral       |
| 151 | p.Pro151Asp | 3871  | 3149 | 3.10 | 3.27 | -2.62E+00 | Neutral       | -2.62E+00 | Neutral       |
| 151 | p.Pro151Glu | 7344  | 6204 | 8.40 | 6.45 | -8.35E-01 | Neutral       | -8.35E-01 | Neutral       |
| 151 | p.Pro151Ala | 5061  | 4390 | 4.05 | 4.56 | -2.27E+00 | Neutral       | -2.27E+00 | Neutral       |
| 151 | p.Pro151Gly | 2399  | 2158 | 1.92 | 2.24 | -8.60E+00 | Indeterminate | -8.60E+00 | Indeterminate |
| 151 | p.Pro151Val | 8770  | 6632 | 7.02 | 6.89 | -1.79E-01 | Neutral       | -1.79E-01 | Neutral       |
| 151 | p.Pro151Tyr | 10716 | 7570 | 8.58 | 7.87 | -3.50E-02 | Neutral       | -3.50E-02 | Neutral       |
| 151 | p.Pro151Cys | 5307  | 3759 | 4.25 | 3.91 | -4.77E-01 | Neutral       | -4.77E-01 | Neutral       |
| 151 | p.Pro151Trp | 6639  | 4694 | 5.32 | 4.88 | -2.33E-01 | Neutral       | -2.33E-01 | Neutral       |
| 151 | p.Pro151Phe | 6424  | 4716 | 5.15 | 4.90 | -3.72E-01 | Neutral       | -3.72E-01 | Neutral       |
| 152 | p.Ser152Asn | 997   | 2807 | 2.80 | 2.66 | -3.22E+00 | Neutral       | -3.22E+00 | Neutral       |
| 152 | p.Ser152Lys | 1636  | 4727 | 4.59 | 4.82 | -2.25E+00 | Neutral       | -2.25E+00 | Neutral       |
| 152 | p.Ser152Thr | 1526  | 4399 | 4.28 | 4.48 | -2.54E+00 | Neutral       | -2.54E+00 | Neutral       |
| 152 | p.Ser152Arg | 1486  | 3962 | 4.17 | 4.04 | -1.68E+00 | Neutral       | -1.68E+00 | Neutral       |
| 152 | p.Ser152Ser | 2605  | 7820 | 7.31 | 7.97 | -1.06E+00 | Neutral       | -1.06E+00 | Neutral       |
| 152 | p.Ser152Ile | 1530  | 3475 | 4.29 | 3.54 | -4.71E-01 | Neutral       | -4.71E-01 | Neutral       |
| 152 | p.Ser152Met | 1280  | 3711 | 3.59 | 3.78 | -3.57E+00 | Neutral       | -3.57E+00 | Neutral       |
| 152 | p.Ser152His | 2226  | 5927 | 6.25 | 6.04 | -6.31E-01 | Neutral       | -6.31E-01 | Neutral       |
| 152 | p.Ser152Gln | 2013  | 4802 | 5.65 | 4.90 | -3.20E-01 | Neutral       | -3.20E-01 | Neutral       |
| 152 | p.Ser152Pro | 1571  | 4606 | 4.41 | 4.70 | -2.64E+00 | Neutral       | -2.64E+00 | Neutral       |
| 152 | p.Ser152Leu | 1380  | 3970 | 3.87 | 4.05 | -3.01E+00 | Neutral       | -3.01E+00 | Neutral       |
| 152 | p.Ser152Asp | 2675  | 7145 | 7.51 | 7.28 | -3.81E-01 | Neutral       | -3.81E-01 | Neutral       |
| 152 | p.Ser152Glu | 1732  | 4745 | 4.86 | 4.84 | -1.44E+00 | Neutral       | -1.44E+00 | Neutral       |
| 152 | p.Ser152Ala | 1609  | 5022 | 4.52 | 5.12 | -3.53E+00 | Neutral       | -3.53E+00 | Neutral       |
| 152 | p.Ser152Gly | 1064  | 3104 | 2.99 | 3.16 | -4.94E+00 | Neutral       | -4.94E+00 | Neutral       |
| 152 | p.Ser152Val | 2808  | 8240 | 9.88 | 8.40 | -7.41E-01 | Neutral       | -7.41E-01 | Neutral       |
| 152 | p.Ser152Tyr | 1351  | 4459 | 3.79 | 4.55 | -6.00E+00 | Indeterminate | -6.00E+00 | Indeterminate |
| 152 | p.Ser152Cys | 2129  | 4765 | 5.98 | 4.86 | -1.37E-01 | Neutral       | -1.37E-01 | Neutral       |
| 152 | p.Ser152Trp | 2066  | 5505 | 5.80 | 5.61 | -7.73E-01 | Neutral       | -7.73E-01 | Neutral       |
| 152 | p.Ser152Phe | 1942  | 5105 | 5.45 | 5.20 | -8.17E-01 | Neutral       | -8.17E-01 | Neutral       |
| 153 | p.Asp153Asn | 6218  | 2873 |      |      |           |               |           |               |

|     |             |       |      |      |       |       |      |      |      |           |               |           |         |           |               |
|-----|-------------|-------|------|------|-------|-------|------|------|------|-----------|---------------|-----------|---------|-----------|---------------|
| 153 | p.Asp153Ala | 8429  | 1977 | 5.60 | 3.38  | 11857 | 4363 | 5.47 | 5.30 | -2.49E-03 | Neutral       | -4.61E-01 | Neutral | -6.16E-02 | Neutral       |
| 153 | p.Asp153Gly | 7582  | 1910 | 5.04 | 3.27  | 11395 | 2748 | 5.26 | 3.34 | -1.41E-02 | Neutral       | -2.20E-03 | Neutral | -9.11E-05 | Neutral       |
| 153 | p.Asp153Val | 6468  | 2574 | 4.30 | 4.40  | 8833  | 3958 | 4.07 | 4.81 | -2.17E+00 | Neutral       | -3.38E+00 | Neutral | -3.27E+00 | Neutral       |
| 153 | p.Asp153Tyr | 6325  | 2136 | 4.20 | 3.65  | 8714  | 4339 | 4.02 | 5.27 | -7.45E-01 | Neutral       | -5.88E+00 | Neutral | -3.98E+00 | Neutral       |
| 153 | p.Asp153Cys | 8817  | 4328 | 5.86 | 7.40  | 12054 | 4932 | 5.56 | 5.99 | -3.86E+00 | Neutral       | -1.03E+00 | Neutral | -2.76E+00 | Neutral       |
| 153 | p.Asp153Trp | 8197  | 3569 | 5.44 | 6.10  | 11348 | 5242 | 5.23 | 6.37 | -2.32E+00 | Neutral       | -2.54E+00 | Neutral | -2.73E+00 | Neutral       |
| 153 | p.Asp153Phe | 8150  | 2936 | 5.41 | 5.02  | 11400 | 4560 | 5.26 | 5.54 | -6.37E-01 | Neutral       | -1.00E+00 | Neutral | -5.44E-01 | Neutral       |
| 154 | p.Ile154Asn | 2296  | 1516 | 4.81 | 5.02  |       |      |      |      | -4.12E+00 | Neutral       |           |         | -4.12E+00 | Neutral       |
| 154 | p.Ile154Lys | 2910  | 1596 | 6.10 | 5.29  |       |      |      |      | -8.25E-01 | Neutral       |           |         | -8.25E-01 | Neutral       |
| 154 | p.Ile154Thr | 2308  | 1518 | 4.84 | 5.03  |       |      |      |      | -4.01E+00 | Neutral       |           |         | -4.01E+00 | Neutral       |
| 154 | p.Ile154Arg | 3084  | 1930 | 6.46 | 6.40  |       |      |      |      | -1.80E+00 | Neutral       |           |         | -1.80E+00 | Neutral       |
| 154 | p.Ile154Ser | 2108  | 1096 | 4.42 | 3.63  |       |      |      |      | -1.22E+00 | Neutral       |           |         | -1.22E+00 | Neutral       |
| 154 | p.Ile154Ile | 3477  | 2093 | 7.29 | 6.94  |       |      |      |      | -1.06E+00 | Neutral       |           |         | -1.06E+00 | Neutral       |
| 154 | p.Ile154Met | 2376  | 1476 | 4.98 | 4.89  |       |      |      |      | -2.85E+00 | Neutral       |           |         | -2.85E+00 | Neutral       |
| 154 | p.Ile154His | 1658  | 1126 | 3.47 | 3.73  |       |      |      |      | -7.49E+00 | Indeterminate |           |         | -7.49E+00 | Indeterminate |
| 154 | p.Ile154Gln | 2231  | 1345 | 4.67 | 4.46  |       |      |      |      | -2.71E+00 | Neutral       |           |         | -2.71E+00 | Neutral       |
| 154 | p.Ile154Pro | 1218  | 831  | 2.55 | 2.75  |       |      |      |      | -1.12E+01 | Indeterminate |           |         | -1.12E+01 | Indeterminate |
| 154 | p.Ile154Leu | 2537  | 1415 | 5.32 | 4.69  |       |      |      |      | -1.30E+00 | Neutral       |           |         | -1.30E+00 | Neutral       |
| 154 | p.Ile154Asp | 2677  | 1599 | 5.61 | 5.30  |       |      |      |      | -1.80E+00 | Neutral       |           |         | -1.80E+00 | Neutral       |
| 154 | p.Ile154Glu | 3009  | 1926 | 6.30 | 6.38  |       |      |      |      | -2.16E+00 | Neutral       |           |         | -2.16E+00 | Neutral       |
| 154 | p.Ile154Ala | 1684  | 1283 | 3.53 | 4.25  |       |      |      |      | -1.13E+01 | Indeterminate |           |         | -1.13E+01 | Indeterminate |
| 154 | p.Ile154Gly | 2477  | 1294 | 5.19 | 4.29  |       |      |      |      | -8.56E-01 | Neutral       |           |         | -8.56E-01 | Neutral       |
| 154 | p.Ile154Val | 2522  | 1819 | 5.28 | 6.03  |       |      |      |      | -5.37E+00 | Neutral       |           |         | -5.37E+00 | Neutral       |
| 154 | p.Ile154Tyr | 1981  | 1370 | 4.15 | 4.54  |       |      |      |      | -6.33E+00 | Indeterminate |           |         | -6.33E+00 | Indeterminate |
| 154 | p.Ile154Cys | 1607  | 1097 | 3.37 | 3.64  |       |      |      |      | -7.96E+00 | Indeterminate |           |         | -7.96E+00 | Indeterminate |
| 154 | p.Ile154Trp | 2865  | 2125 | 6.00 | 7.04  |       |      |      |      | -5.04E+00 | Neutral       |           |         | -5.04E+00 | Neutral       |
| 154 | p.Ile154Phe | 2701  | 1718 | 5.66 | 5.69  |       |      |      |      | -2.57E+00 | Neutral       |           |         | -2.57E+00 | Neutral       |
| 155 | p.Pro155Asn | 7516  | 1212 | 4.52 | 4.44  |       |      |      |      | -1.38E+00 | Neutral       |           |         | -1.38E+00 | Neutral       |
| 155 | p.Pro155Lys | 6712  | 1306 | 4.04 | 4.79  |       |      |      |      | -4.81E+00 | Neutral       |           |         | -4.81E+00 | Neutral       |
| 155 | p.Pro155Thr | 9334  | 283  | 5.62 | 1.04  |       |      |      |      | 0.00E+00  | Neutral       |           |         | 0.00E+00  | Neutral       |
| 155 | p.Pro155Arg | 9747  | 1439 | 5.87 | 5.28  |       |      |      |      | -3.44E-01 | Neutral       |           |         | -3.44E-01 | Neutral       |
| 155 | p.Pro155Ser | 8082  | 2822 | 4.86 | 10.35 |       |      |      |      | -2.83E+01 | Indeterminate |           |         | -2.82E+01 | Indeterminate |
| 155 | p.Pro155Ile | 7620  | 1707 | 4.59 | 6.26  |       |      |      |      | -7.35E+00 | Indeterminate |           |         | -7.35E+00 | Indeterminate |
| 155 | p.Pro155Met | 8315  | 793  | 5.00 | 2.91  |       |      |      |      | -1.94E-03 | Neutral       |           |         | -1.94E-03 | Neutral       |
| 155 | p.Pro155His | 9630  | 2577 | 5.80 | 9.45  |       |      |      |      | -1.07E+01 | Indeterminate |           |         | -1.07E+01 | Indeterminate |
| 155 | p.Pro155Gln | 7547  | 572  | 4.54 | 2.10  |       |      |      |      | -3.92E-05 | Neutral       |           |         | -3.92E-05 | Neutral       |
| 155 | p.Pro155Pro | 8846  | 1450 | 5.32 | 5.32  |       |      |      |      | -1.06E+00 | Neutral       |           |         | -1.06E+00 | Neutral       |
| 155 | p.Pro155Leu | 12220 | 1003 | 7.35 | 3.68  |       |      |      |      | -6.49E-06 | Neutral       |           |         | -6.49E-06 | Neutral       |
| 155 | p.Pro155Asp | 9525  | 3729 | 5.73 | 13.67 |       |      |      |      | -3.28E+01 | Indeterminate |           |         | -3.20E+01 | Indeterminate |
| 155 | p.Pro155Glu | 8909  | 797  | 5.36 | 2.92  |       |      |      |      | -3.84E-04 | Neutral       |           |         | -3.84E-04 | Neutral       |
| 155 | p.Pro155Ala | 4663  | 140  | 2.81 | 0.51  |       |      |      |      | -3.27E-14 | Neutral       |           |         | 0.00E+00  | Neutral       |
| 155 | p.Pro155Gly | 8335  | 970  | 5.02 | 3.56  |       |      |      |      | -4.22E-02 | Neutral       |           |         | -4.22E-02 | Neutral       |
| 155 | p.Pro155Val | 8856  | 2882 | 5.33 | 10.57 |       |      |      |      | -2.16E+01 | Indeterminate |           |         | -2.16E+01 | Indeterminate |
| 155 | p.Pro155Tyr | 9258  | 1066 | 5.57 | 3.91  |       |      |      |      | -2.25E-02 | Neutral       |           |         | -2.25E-02 | Neutral       |
| 155 | p.Pro155Cys | 7343  | 471  | 4.42 | 1.73  |       |      |      |      | -1.03E-06 | Neutral       |           |         | -1.03E-06 | Neutral       |
| 155 | p.Pro155Trp | 7079  | 1840 | 4.26 | 6.75  |       |      |      |      | -1.37E+01 | Indeterminate |           |         | -1.37E+01 | Indeterminate |
| 155 | p.Pro155Phe | 6611  | 211  | 3.98 | 0.77  |       |      |      |      | -5.77E-15 | Neutral       |           |         | 0.00E+00  | Neutral       |
| 156 | p.Asp156Asn | 5066  | 1583 | 4.64 | 4.64  |       |      |      |      | -3.19E+00 | Neutral       |           |         | -3.19E+00 | Neutral       |
| 156 | p.Asp156Lys | 2453  | 728  | 2.25 | 2.13  |       |      |      |      | -7.54E+00 | Indeterminate |           |         | -7.54E+00 | Indeterminate |
| 156 | p.Asp156Thr | 7734  | 2477 | 7.09 | 7.26  |       |      |      |      | -1.63E+00 | Neutral       |           |         | -1.63E+00 | Neutral       |
| 156 | p.Asp156Arg | 3732  | 1122 | 3.42 | 3.29  |       |      |      |      | -4.36E+00 | Neutral       |           |         | -4.36E+00 | Neutral       |
| 156 | p.Asp156Ser | 8975  | 2716 | 8.23 | 7.96  |       |      |      |      | -7.69E-01 | Neutral       |           |         | -7.69E-01 | Neutral       |
| 156 | p.Asp156Ile | 4671  | 1355 | 4.28 | 3.97  |       |      |      |      | -2.46E+00 | Neutral       |           |         | -2.46E+00 | Neutral       |
| 156 | p.Asp156Met | 5697  | 1689 | 5.22 | 4.95  |       |      |      |      | -1.90E+00 | Neutral       |           |         | -1.90E+00 | Neutral       |
| 156 | p.Asp156His | 3364  | 981  | 3.08 | 2.87  |       |      |      |      | -4.44E+00 | Neutral       |           |         | -4.44E+00 | Neutral       |
| 156 | p.Asp156Gln | 4870  | 1727 | 4.46 | 5.06  |       |      |      |      | -6.15E+00 | Indeterminate |           |         | -6.15E+00 | Indeterminate |
| 156 | p.Asp156Pro | 7585  | 2236 | 6.95 | 6.55  |       |      |      |      | -9.64E-01 | Neutral       |           |         | -9.64E-01 | Neutral       |
| 156 | p.Asp156Leu | 5547  | 1799 | 5.08 | 5.27  |       |      |      |      | -3.31E+00 | Neutral       |           |         | -3.31E+00 | Neutral       |
| 156 | p.Asp156Asp | 7593  | 2269 | 6.96 | 6.65  |       |      |      |      | -1.06E+00 | Neutral       |           |         | -1.06E+00 | Neutral       |
| 156 | p.Asp156Glu | 6739  | 2108 | 6.18 | 6.17  |       |      |      |      | -1.87E+00 | Neutral       |           |         | -1.87E+00 | Neutral       |
| 156 | p.Asp156Ala | 4389  | 1665 | 4.02 | 4.88  |       |      |      |      | -9.22E+00 | Indeterminate |           |         | -9.22E+00 | Indeterminate |
| 156 | p.Asp156Gly | 5406  | 1778 | 4.96 | 5.21  |       |      |      |      | -3.71E+00 | Neutral       |           |         | -3.71E+00 | Neutral       |
| 156 | p.Asp156Val | 5781  | 1953 | 5.30 | 5.72  |       |      |      |      | -3.79E+00 | Neutral       |           |         | -3.79E+00 | Neutral       |
| 156 | p.Asp156Tyr | 4106  | 1384 | 3.76 | 4.05  |       |      |      |      | -6.31E+00 | Indeterminate |           |         | -6.31E+00 | Indeterminate |
| 156 | p.Asp156Cys | 3646  | 1198 | 3.34 | 3.51  |       |      |      |      | -6.69E+00 | Indeterminate |           |         | -6.69E+00 | Indeterminate |
| 156 | p.Asp156Trp | 4783  | 1291 | 4.38 | 3.78  |       |      |      |      | -1.51E+00 | Neutral       |           |         | -1.51E+00 | Neutral       |
| 156 | p.Asp156Phe | 6952  | 2080 | 6.37 | 6.09  |       |      |      |      | -1.31E+00 | Neutral       |           |         | -1.31E+00 | Neutral       |
