# Supplementary material for: Functional characterization of all CDKN2A missense variants and comparison to in silico models of pathogenicity
Source: bioRxiv preprint, doi:10.1101/2023.12.28.573507, version 3 (2025-02-11)
Supplement: Appendix 1-table 7 [file 573507_file13.pdf]

Appendix 1-table 7. In silico variant effect predictions for *CDKN24* missense variants.

| Protein     | ACMG Guideline | This study  |                | AlphaMissense |            | ESM1b  |            | VEST  |            | Polyphen-2 |                   | SIFT  |             | CADD  |             |
|-------------|----------------|-------------|----------------|---------------|------------|--------|------------|-------|------------|------------|-------------------|-------|-------------|-------|-------------|
| Consequence | Classification | Log P value | Characteristic | Score         | Prediction | Score  | Prediction | Score | Prediction | Score      | Prediction        | Score | Prediction  | Score | Prediction  |
| p.Met1Asn   | VUS            | -0.15       | Neutral        | 0.34          | Benign     | -11.02 | Pathogenic | 0.44  | Neutral    | 0.19       | Benign            | 0     | Deleterious |       |             |
| p.Met1Lys   | VUS            | -0.01       | Neutral        | 0.18          | Benign     | -10.15 | Pathogenic | 0.48  | Neutral    | 0.04       | Benign            | 0     | Deleterious | 14.26 | Neutral     |
| p.Met1Thr   | VUS            | -0.14       | Neutral        | 0.11          | Benign     | -8.46  | Pathogenic | 0.43  | Neutral    | 0.00       | Benign            | 0     | Deleterious | 12.50 | Neutral     |
| p.Met1Arg   | VUS            | -0.22       | Neutral        | 0.10          | Benign     | -8.48  | Pathogenic | 0.57  | Disease    | 0.00       | Benign            | 0     | Deleterious | 14.15 | Neutral     |
| p.Met1Ser   | VUS            | -0.01       | Neutral        | 0.15          | Benign     | -7.86  | Pathogenic | 0.43  | Neutral    | 0.05       | Benign            | 0     | Deleterious |       |             |
| p.Met1Ile   | VUS            | -0.44       | Neutral        | 0.22          | Benign     | -10.40 | Pathogenic | 0.36  | Neutral    | 0.15       | Benign            | 0     | Deleterious | 18.53 | Deleterious |
| p.Met1His   | VUS            | -1.27       | Neutral        | 0.22          | Benign     | -10.63 | Pathogenic | 0.41  | Neutral    | 0.62       | Possibly damaging | 0     | Deleterious |       |             |
| p.Met1Gln   | VUS            | -0.12       | Neutral        | 0.07          | Benign     | -9.16  | Pathogenic | 0.40  | Neutral    | 0.10       | Benign            | 0     | Deleterious |       |             |
| p.Met1Pro   | VUS            | -0.36       | Neutral        | 0.22          | Benign     | -7.53  | Pathogenic | 0.44  | Neutral    | 0.32       | Benign            | 0     | Deleterious |       |             |
| p.Met1Leu   | VUS            | -0.02       | Neutral        | 0.11          | Benign     | -8.18  | Pathogenic | 0.35  | Neutral    | 0.03       | Benign            | 0     | Deleterious | 16.05 | Deleterious |
| p.Met1Asp   | VUS            | 0.00        | Neutral        | 0.33          | Benign     | -9.42  | Pathogenic | 0.43  | Neutral    | 0.05       | Benign            | 0     | Deleterious |       |             |
| p.Met1Glu   | VUS            | -0.96       | Neutral        | 0.18          | Benign     | -8.42  | Pathogenic | 0.46  | Neutral    | 0.00       | Benign            | 0     | Deleterious |       |             |
| p.Met1Ala   | VUS            | -0.07       | Neutral        | 0.08          | Benign     | -7.47  | Benign     | 0.39  | Neutral    | 0.02       | Benign            | 0     | Deleterious |       |             |
| p.Met1Gly   | VUS            | -0.36       | Neutral        | 0.16          | Benign     | -7.93  | Pathogenic | 0.44  | Neutral    | 0.00       | Benign            | 0     | Deleterious |       |             |
| p.Met1Val   | VUS            | -4.16       | Neutral        | 0.07          | Benign     | -8.26  | Pathogenic | 0.30  | Neutral    | 0.04       | Benign            | 0     | Deleterious | 15.11 | Deleterious |
| p.Met1Tyr   | VUS            | -0.02       | Neutral        | 0.31          | Benign     | -11.51 | Pathogenic | 0.37  | Neutral    | 0.83       | Possibly damaging | 0     | Deleterious |       |             |
| p.Met1Cys   | VUS            | -0.01       | Neutral        | 0.14          | Benign     | -10.28 | Pathogenic | 0.41  | Neutral    | 0.95       | Possibly damaging | 0     | Deleterious |       |             |
| p.Met1Trp   | VUS            | -1.15       | Neutral        | 0.19          | Benign     | -10.35 | Pathogenic | 0.37  | Neutral    | 0.95       | Possibly damaging | 0     | Deleterious |       |             |
| p.Met1Phe   | VUS            | -0.27       | Neutral        | 0.12          | Benign     | -10.79 | Pathogenic | 0.34  | Neutral    | 0.83       | Possibly damaging | 0     | Deleterious |       |             |
| p.Glu2Asn   | VUS            | 0.00        | Neutral        | 0.16          | Benign     | -6.38  | Benign     | 0.25  | Neutral    | 0.21       | Benign            | 0     | Deleterious |       |             |
| p.Glu2Lys   | VUS            | 0.00        | Neutral        | 0.18          | Benign     | -6.28  | Benign     | 0.22  | Neutral    | 0.08       | Benign            | 0     | Deleterious | 18.01 | Deleterious |
| p.Glu2Thr   | VUS            | 0.00        | Neutral        | 0.14          | Benign     | -5.22  | Benign     | 0.26  | Neutral    | 0.34       | Benign            | 0     | Deleterious |       |             |
| p.Glu2Arg   | VUS            | 0.00        | Neutral        | 0.14          | Benign     | -5.17  | Benign     | 0.29  | Neutral    | 0.00       | Benign            | 0     | Deleterious |       |             |
| p.Glu2Ser   | VUS            | -0.13       | Neutral        | 0.11          | Benign     | -4.30  | Benign     | 0.30  | Neutral    | 0.34       | Benign            | 0     | Deleterious |       |             |
| p.Glu2Ile   | VUS            | 0.00        | Neutral        | 0.25          | Benign     | -7.33  | Benign     | 0.33  | Neutral    | 0.65       | Possibly damaging | 0     | Deleterious |       |             |
| p.Glu2Met   | VUS            | -0.01       | Neutral        | 0.36          | Ambiguous  | -7.24  | Benign     | 0.33  | Neutral    | 0.93       | Possibly damaging | 0     | Deleterious |       |             |
| p.Glu2His   | VUS            | 0.00        | Neutral        | 0.18          | Benign     | -6.40  | Benign     | 0.28  | Neutral    | 0.65       | Possibly damaging | 0     | Deleterious |       |             |
| p.Glu2Gln   | VUS            | 0.00        | Neutral        | 0.09          | Benign     | -5.39  | Benign     | 0.17  | Neutral    | 0.01       | Benign            | 0     | Deleterious | 12.97 | Neutral     |
| p.Glu2Pro   | VUS            | 0.00        | Neutral        | 0.12          | Benign     | -4.12  | Benign     | 0.32  | Neutral    | 0.79       | Possibly damaging | 0     | Deleterious |       |             |
| p.Glu2Leu   | VUS            | 0.00        | Neutral        | 0.20          | Benign     | -5.40  | Benign     | 0.32  | Neutral    | 0.21       | Benign            | 0     | Deleterious |       |             |
| p.Glu2Asp   | VUS            | 0.00        | Neutral        | 0.10          | Benign     | -4.35  | Benign     | 0.17  | Neutral    | 0.00       | Benign            | 0     | Deleterious | 13.41 | Neutral     |
| p.Glu2Ala   | VUS            | -0.02       | Neutral        | 0.09          | Benign     | -3.30  | Benign     | 0.19  | Neutral    | 0.16       | Benign            | 0     | Deleterious | 18.03 | Deleterious |
| p.Glu2Gly   | VUS            | 0.00        | Neutral        | 0.10          | Benign     | -4.46  | Benign     | 0.24  | Neutral    | 0.28       | Benign            | 0     | Deleterious | 20.50 | Deleterious |
| p.Glu2Val   | VUS            | 0.00        | Neutral        | 0.18          | Benign     | -5.70  | Benign     | 0.21  | Neutral    | 0.58       | Possibly damaging | 0     | Deleterious | 19.22 | Deleterious |
| p.Glu2Tyr   | VUS            | 0.00        | Neutral        | 0.29          | Benign     | -7.99  | Pathogenic | 0.32  | Neutral    | 0.00       | Benign            | 0     | Deleterious |       |             |
| p.Glu2Cys   | VUS            | -0.05       | Neutral        | 0.57          | Pathogenic | -6.92  | Benign     | 0.34  | Neutral    | 0.98       | Probably damaging | 0     | Deleterious |       |             |
| p.Glu2Trp   | VUS            | 0.00        | Neutral        | 0.56          | Ambiguous  | -7.47  | Benign     | 0.35  | Neutral    | 0.93       | Possibly damaging | 0     | Deleterious |       |             |
| p.Glu2Phe   | VUS            | 0.00        | Neutral        | 0.33          | Benign     | -7.07  | Benign     | 0.34  | Neutral    | 0.48       | Possibly damaging | 0     | Deleterious |       |             |
| p.Pro3Asn   | VUS            | -7.64       | Indeterminate  | 0.15          | Benign     | -6.32  | Benign     | 0.28  | Neutral    | 0.05       | Benign            | 0     | Deleterious |       |             |
| p.Pro3Lys   | VUS            | -18.39      | Indeterminate  | 0.14          | Benign     | -6.26  | Benign     | 0.24  | Neutral    | 0.01       | Benign            | 0     | Deleterious |       |             |
| p.Pro3Thr   | VUS            | -10.80      | Indeterminate  | 0.06          | Benign     | -4.43  | Benign     | 0.18  | Neutral    | 0.02       | Benign            | 0     | Deleterious | 12.72 | Neutral     |
| p.Pro3Arg   | VUS            | -33.21      | Indeterminate  | 0.08          | Benign     | -4.81  | Benign     | 0.21  | Neutral    | 0.00       | Benign            | 0     | Deleterious | 0.00  | Neutral     |
| p.Pro3Ser   | VUS            | -22.54      | Indeterminate  | 0.07          | Benign     | -3.83  | Benign     | 0.16  | Neutral    | 0.00       | Benign            | 0     | Deleterious | 12.92 | Neutral     |
| p.Pro3Ile   | VUS            | -11.27      | Indeterminate  | 0.17          | Benign     | -6.97  | Benign     | 0.25  | Neutral    | 0.03       | Benign            | 0     | Deleterious |       |             |
| p.Pro3Met   | VUS            | -23.54      | Indeterminate  | 0.21          | Benign     | -6.54  | Benign     | 0.24  | Neutral    | 0.32       | Benign            | 0     | Deleterious |       |             |
| p.Pro3His   | VUS            | -5.11       | Neutral        | 0.11          | Benign     | -6.20  | Benign     | 0.18  | Neutral    | 0.00       | Benign            | 0     | Deleterious |       |             |
| p.Pro3Gln   | VUS            | -0.28       | Neutral        | 0.08          | Benign     | -5.60  | Benign     | 0.25  | Neutral    | 0.00       | Benign            | 0     | Deleterious | 0.01  | Neutral     |
| p.Pro3Leu   | VUS            | -15.02      | Indeterminate  | 0.11          | Benign     | -5.31  | Benign     | 0.14  | Neutral    | 0.00       | Benign            | 0     | Deleterious | 0.02  | Neutral     |
| p.Pro3Asp   | VUS            | -14.44      | Indeterminate  | 0.12          | Benign     | -4.22  | Benign     | 0.26  | Neutral    | 0.05       | Benign            | 0     | Deleterious |       |             |
| p.Pro3Glu   | VUS            | -4.70       | Neutral        | 0.08          | Benign     | -3.98  | Benign     | 0.28  | Neutral    | 0.01       | Benign            | 0     | Deleterious |       |             |
| p.Pro3Ala   | VUS            | -3.70       | Neutral        | 0.04          | Benign     | -2.61  | Benign     | 0.21  | Neutral    | 0.01       | Benign            | 0     | Deleterious | 10.50 | Neutral     |
| p.Pro3Gly   | VUS            | -53.15      | Deleterious    | 0.10          | Benign     | -3.74  | Benign     | 0.25  | Neutral    | 0.03       | Benign            | 0     | Deleterious |       |             |
| p.Pro3Val   | VUS            | -14.34      | Indeterminate  | 0.10          | Benign     | -5.05  | Benign     | 0.24  | Neutral    | 0.03       | Benign            | 0     | Deleterious |       |             |
| p.Pro3Tyr   | VUS            | -5.47       | Neutral        | 0.25          | Benign     | -7.97  | Pathogenic | 0.26  | Neutral    | 0.00       | Benign            | 0     | Deleterious |       |             |
| p.Pro3Cys   | VUS            | -11.32      | Indeterminate  | 0.33          | Benign     | -6.71  | Benign     | 0.25  | Neutral    | 0.75       | Possibly damaging | 0     | Deleterious |       |             |
| p.Pro3Trp   | VUS            | -31.79      | Indeterminate  | 0.32          | Benign     | -7.79  | Pathogenic | 0.27  | Neutral    | 0.49       | Possibly damaging | 0     | Deleterious |       |             |
| p.Pro3Phe   | VUS            | -12.58      | Indeterminate  | 0.25          | Benign     | -7.36  | Benign     | 0.26  | Neutral    | 0.06       | Benign            | 0     | Deleterious |       |             |
| p.Ala4Asn   | VUS            | -5.71       | Neutral        | 0.20          | Benign     | -5.54  | Benign     | 0.24  | Neutral    | 0.19       | Benign            | 0.05  | Deleterious |       |             |
| p.Ala4Lys   | VUS            | -1.31       | Neutral        | 0.22          | Benign     | -6.17  | Benign     | 0.26  | Neutral    | 0.19       | Benign            | 0.07  | Tolerated   |       |             |
| p.Ala4Thr   | VUS            | -33.22      | Indeterminate  | 0.09          | Benign     | -4.69  | Benign     | 0.20  | Neutral    | 0.15       | Benign            | 0.11  | Tolerated   | 15.19 | Deleterious |
| p.Ala4Arg   | VUS            | -1.41       | Neutral        | 0.14          | Benign     | -4.55  | Benign     | 0.26  | Neutral    | 0.45       | Benign            | 0.05  | Deleterious |       |             |
| p.Ala4Ser   | VUS            | -53.15      | Deleterious    | 0.09          | Benign     | -2.95  | Benign     | 0.19  | Neutral    | 0.07       | Benign            | 0.5   | Tolerated   | 10.21 | Neutral     |
| p.Ala4Ile   | VUS            | -0.18       | Neutral        | 0.22          | Benign     | -6.32  | Benign     | 0.24  | Neutral    | 0.10       | Benign            | 0.03  | Deleterious |       |             |
| p.Ala4Met   | VUS            | -7.81       | Indeterminate  | 0.25          | Benign     | -6.25  | Benign     | 0.23  | Neutral    | 0.62       | Possibly damaging | 0.02  | Deleterious |       |             |
| p.Ala4His   | VUS            | -1.31       | Neutral        | 0.20          | Benign     | -6.23  | Benign     | 0.24  | Neutral    | 0.83       | Possibly damaging | 0.02  | Deleterious |       |             |
| p.Ala4Gln   | VUS            | -0.32       | Neutral        | 0.14          | Benign     | -5.70  | Benign     | 0.24  | Neutral    | 0.45       | Benign            | 0.05  | Deleterious |       |             |
| p.Ala4Pro   | VUS            | -0.63       | Neutral        | 0.08          | Benign     | -3.99  | Benign     | 0.23  | Neutral    | 0.79       | Possibly damaging | 0.07  | Tolerated   | 15.45 | Deleterious |
| p.Ala4Leu   | VUS            | -0.91       | Neutral        | 0.14          | Benign     | -4.80  | Benign     | 0.27  | Neutral    | 0.05       | Benign            | 0.04  | Deleterious |       |             |
| p.Ala4Asp   | VUS            | -3.20       | Neutral        | 0.10          | Benign     | -4.74  | Benign     | 0.23  | Neutral    | 0.10       | Benign            | 0.06  | Tolerated   |       |             |
| p.Ala4Glu   | VUS            | -0.02       | Neutral        | 0.10          | Benign     | -4.54  | Benign     | 0.21  | Neutral    | 0.01       | Benign            | 0.08  | Tolerated   | 12.91 | Neutral     |
| p.Ala4Gly   | VUS            | -6.58       | Indeterminate  | 0.08          | Benign     | -3.58  | Benign     | 0.21  | Neutral    | 0.00       | Benign            | 0.13  | Tolerated   | 14.74 | Neutral     |
| p.Ala4Val   | VUS            | -0.11       | Neutral        | 0.11          | Benign     | -4.86  | Benign     | 0.13  | Neutral    | 0.00       | Benign            | 0.06  | Tolerated   | 14.00 | Neutral     |
| p.Ala4Tyr   | VUS            | -0.67       | Neutral        | 0.27          | Benign     | -7.04  | Benign     | 0.27  | Neutral    | 0.45       | Benign            | 0.02  | Deleterious |       |             |
| p.Ala4Cys   | VUS            | -32.26      | Indeterminate  | 0.29          | Benign     | -5.69  | Benign     | 0.25  | Neutral    | 0.95       | Possibly damaging | 0.02  | Deleterious |       |             |
| p.Ala4Trp   | VUS            | -2.02       | Neutral        | 0.33          | Benign     | -7.03  | Benign     | 0.23  | Neutral    | 0.00       | Benign            | 0.01  | Deleterious |       |             |
| p.Ala4Phe   | VUS            | -8.96       | Indeterminate  | 0.20          | Benign     | -6.43  | Benign     | 0.25  | Neutral    | 0.45       | Benign            | 0.02  | Deleterious |       |             |
| p.Ala5Asn   | VUS            | -0.01       | Neutral        | 0.19          | Benign     | -5.78  | Benign     | 0.27  | Neutral    | 0.48       | Possibly damaging | 0.06  | Tolerated   |       |             |
| p.Ala5Lys   | VUS            | 0.00        | Neutral        | 0.21          | Benign     | -5.65  | Benign     | 0.27  | Neutral    | 0.21       | Benign            | 0.07  | Tolerated   |       |             |
| p.Ala5Thr   | VUS            | -0.77       | Neutral        | 0.09          | Benign     | -4.08  | Benign     | 0.17  | Neutral    | 0.28       | Benign            | 0.08  | Tolerated   | 9.47  | Neutral     |
| p.Ala5Arg   | VUS            | 0.00        | Neutral        | 0.13          | Benign     | -4.42  | Benign     | 0.29  | Neutral    | 0.65       | Possibly damaging | 0.05  | Deleterious |       |             |
| p.Ala5Ser   | VUS            | -33.22      | Indeterminate  | 0.08          | Benign     | -3.80  | Benign     | 0.18  | Neutral    | 0.02       | Benign            | 0.19  | Tolerated   | 6.32  | Neutral     |
| p.Ala5Ile   | VUS            | 0.00        | Neutral        | 0.22          | Benign     | -6.07  | Benign     | 0.28  | Neutral    | 0.21       | Benign            | 0.02  | Deleterious |       |             |
| p.Ala5Met   | VUS            | -0.27       | Neutral        | 0.25          | Benign     | -4.19  | Benign     | 0.29  | Neutral    | 0.65       | Possibly damaging | 0.02  | Deleterious |       |             |
| p.Ala5His   | VUS            | -0.66       | Neutral        | 0.20          | Benign     | -6.30  | Benign     | 0.28  | Neutral    | 0.93       | Possibly damaging | 0.02  | Deleterious |       |             |
| p.Ala5Gln   | VUS            | -0.83       | Neutral        | 0.14          | Benign     | -5.76  | Benign     | 0.27  | Neutral    | 0.48       | Possibly damaging | 0.05  | Deleterious |       |             |
| p.Ala5Pro   | VUS            | -0.07       | Neutral        | 0.07          | Benign     | -3.82  | Benign     | 0.26  | Neutral    | 0.74       | Possibly damaging | 0.09  | Tolerated   | 9.87  | Neutral     |
| p.Ala5Leu   | VUS            | -9.21       | Indeterminate  | 0.13          | Benign     | -4.31  | Benign     | 0.28  | Neutral    | 0.00       | Benign            | 0.05  | Deleterious |       |             |
| p.Ala5Asp   | VUS            | -1.63       | Neutral        | 0.11          | Benign     | -4.48  | Benign     | 0.23  | Neutral    | 0.00       | Benign            | 0.06  | Tolerated   |       |             |
| p.Ala5Glu   | VUS            | -6.48       | Indeterminate  | 0.10          | Benign     | -4.50  | Benign     | 0.23  | Neutral    | 0.00       | Benign            | 0.08  | Tolerated   | 7.82  | Neutral     |
| p.Ala5Gly   | VUS            | -0.22       | Neutral        | 0.07          | Benign     | -3.84  | Benign     | 0.21  | Neutral    | 0.29       | Benign            | 0.48  | Tolerated   | 9.20  | Neutral     |
| p.Ala5Val   | VUS            | -0.09       | Neutral        | 0.12          | Benign     | -4.34  | Benign     | 0.20  | Neutral    | 0.08       | Benign            | 0.06  | Tolerated   | 9.18  | Neutral     |
| p.Ala5Tyr   | VUS            | -53.15      | Deleterious    | 0.27          | Benign     | -7.06  | Benign     | 0.31  | Neutral    | 0.79       | Possibly damaging | 0.02  | Deleterious |       |             |
| p.Ala5Cys   | VUS            | -4.14       | Neutral        | 0.29          | Benign     | -5.94  | Benign     | 0.26  | Neutral    | 0.98       | Probably damaging | 0.03  | Deleterious |       |             |
| p.Ala5Trp   | VUS            | -25.53      | Indeterminate  | 0.30          | Benign     | -6.63  | Benign     | 0.32  | Neutral    | 0.98       | Probably damaging | 0.01  | Deleterious |       |             |
| p.Ala5Phe   | VUS            | -0.47       | Neutral        | 0.19          | Benign     | -6.40  | Benign     | 0.27  | Neutral    | 0.65       | Possibly damaging | 0.02  | Deleterious |       |             |
| p.Gly6Asn   | VUS            | -0.09       | Neutral        | 0.19          | Benign     | -6.09  | Benign     | 0.23  | Neutral    | 1.00       | Probably damaging | 0     | Deleterious |       |             |

|            |     |        |               |      |            |       |          |      |         |      |                   |      |             |       |             |
|------------|-----|--------|---------------|------|------------|-------|----------|------|---------|------|-------------------|------|-------------|-------|-------------|
| p.Gly6Glu  | VUS | -0.72  | Neutral       | 0.09 | Benign     | -3.51 | Benign   | 0.13 | Neutral | 1.00 | Probably damaging | 0    | Deleterious | 6.13  | Neutral     |
| p.Gly6Ala  | VUS | -0.20  | Neutral       | 0.07 | Benign     | -3.05 | Benign   | 0.11 | Neutral | 1.00 | Probably damaging | 0    | Deleterious | 0.10  | Neutral     |
| p.Gly6Val  | VUS | -0.05  | Neutral       | 0.10 | Benign     | -4.63 | Benign   | 0.14 | Neutral | 1.00 | Probably damaging | 0    | Deleterious | 7.89  | Neutral     |
| p.Gly6Tyr  | VUS | -0.77  | Neutral       | 0.24 | Benign     | -7.14 | Benign   | 0.23 | Neutral | 1.00 | Probably damaging | 0    | Deleterious |       |             |
| p.Gly6Cys  | VUS | -13.23 | Indeterminate | 0.15 | Benign     | -5.88 | Benign   | 0.18 | Neutral | 1.00 | Probably damaging | 0    | Deleterious |       |             |
| p.Gly6Trp  | VUS | -3.24  | Neutral       | 0.18 | Benign     | -6.33 | Benign   | 0.21 | Neutral | 1.00 | Probably damaging | 0    | Deleterious | 20.50 | Deleterious |
| p.Gly6Phe  | VUS | -5.31  | Neutral       | 0.27 | Benign     | -6.22 | Benign   | 0.21 | Neutral | 1.00 | Probably damaging | 0    | Deleterious |       |             |
| p.Ser7Asn  | VUS | -0.07  | Neutral       | 0.16 | Benign     | -6.24 | Benign   | 0.16 | Neutral | 0.91 | Possibly damaging | 0.41 | Tolerated   | 10.26 | Neutral     |
| p.Ser7Lys  | VUS | -0.18  | Neutral       | 0.31 | Benign     | -6.64 | Benign   | 0.27 | Neutral | 0.93 | Possibly damaging | 0.31 | Tolerated   |       |             |
| p.Ser7Thr  | VUS | -11.20 | Indeterminate | 0.09 | Benign     | -4.38 | Benign   | 0.19 | Neutral | 0.81 | Possibly damaging | 0.38 | Tolerated   | 10.06 | Neutral     |
| p.Ser7Arg  | VUS | -0.03  | Neutral       | 0.19 | Benign     | -4.15 | Benign   | 0.16 | Neutral | 0.97 | Probably damaging | 0.19 | Tolerated   | 11.49 | Neutral     |
| p.Ser7Ile  | VUS | -1.33  | Neutral       | 0.16 | Benign     | -6.23 | Benign   | 0.25 | Neutral | 0.97 | Probably damaging | 0.09 | Tolerated   | 15.55 | Deleterious |
| p.Ser7Met  | VUS | -0.71  | Neutral       | 0.25 | Benign     | -6.72 | Benign   | 0.30 | Neutral | 0.98 | Probably damaging | 0.06 | Tolerated   |       |             |
| p.Ser7His  | VUS | -3.32  | Neutral       | 0.15 | Benign     | -5.85 | Benign   | 0.28 | Neutral | 0.98 | Probably damaging | 0.1  | Tolerated   |       |             |
| p.Ser7Gln  | VUS | -0.38  | Neutral       | 0.20 | Benign     | -5.54 | Benign   | 0.25 | Neutral | 0.98 | Probably damaging | 0.2  | Tolerated   |       |             |
| p.Ser7Pro  | VUS | -0.71  | Neutral       | 0.08 | Benign     | -2.24 | Benign   | 0.22 | Neutral | 0.93 | Possibly damaging | 0.25 | Tolerated   |       |             |
| p.Ser7Leu  | VUS | -8.57  | Indeterminate | 0.15 | Benign     | -4.35 | Benign   | 0.25 | Neutral | 0.93 | Possibly damaging | 0.15 | Tolerated   |       |             |
| p.Ser7Asp  | VUS | -0.96  | Neutral       | 0.15 | Benign     | -4.70 | Benign   | 0.24 | Neutral | 0.93 | Possibly damaging | 0.39 | Tolerated   |       |             |
| p.Ser7Glu  | VUS | -29.43 | Indeterminate | 0.16 | Benign     | -4.81 | Benign   | 0.25 | Neutral | 0.93 | Possibly damaging | 0.31 | Tolerated   |       |             |
| p.Ser7Ala  | VUS | -19.51 | Indeterminate | 0.07 | Benign     | -3.25 | Benign   | 0.20 | Neutral | 0.71 | Possibly damaging | 0.82 | Tolerated   |       |             |
| p.Ser7Gly  | VUS | -0.02  | Neutral       | 0.07 | Benign     | -3.27 | Benign   | 0.16 | Neutral | 0.81 | Possibly damaging | 0.72 | Tolerated   | 9.07  | Neutral     |
| p.Ser7Val  | VUS | -4.25  | Neutral       | 0.15 | Benign     | -4.90 | Benign   | 0.31 | Neutral | 0.93 | Possibly damaging | 0.18 | Tolerated   |       |             |
| p.Ser7Tyr  | VUS | -33.19 | Indeterminate | 0.14 | Benign     | -7.30 | Benign   | 0.25 | Neutral | 0.98 | Probably damaging | 0.09 | Tolerated   |       |             |
| p.Ser7Cys  | VUS | -3.14  | Neutral       | 0.11 | Benign     | -5.61 | Benign   | 0.23 | Neutral | 0.99 | Probably damaging | 0.09 | Tolerated   | 13.90 | Neutral     |
| p.Ser7Trp  | VUS | -6.60  | Indeterminate | 0.14 | Benign     | -6.50 | Benign   | 0.32 | Neutral | 0.99 | Probably damaging | 0.02 | Deleterious |       |             |
| p.Ser7Phe  | VUS | -1.35  | Neutral       | 0.15 | Benign     | -6.30 | Benign   | 0.27 | Neutral | 0.98 | Probably damaging | 0.07 | Tolerated   |       |             |
| p.Ser8Asn  | VUS | 0.00   | Neutral       | 0.19 | Benign     | -5.65 | Benign   | 0.15 | Neutral | 0.91 | Possibly damaging | 0    | Deleterious | 11.20 | Neutral     |
| p.Ser8Lys  | VUS | -21.11 | Indeterminate | 0.35 | Ambiguous  | -6.11 | Benign   | 0.26 | Neutral | 0.93 | Possibly damaging | 0    | Deleterious |       |             |
| p.Ser8Thr  | VUS | -0.54  | Neutral       | 0.09 | Benign     | -4.19 | Benign   | 0.15 | Neutral | 0.81 | Possibly damaging | 0    | Deleterious | 9.91  | Neutral     |
| p.Ser8Arg  | VUS | -0.04  | Neutral       | 0.20 | Benign     | -4.19 | Benign   | 0.21 | Neutral | 0.97 | Probably damaging | 0    | Deleterious | 13.46 | Neutral     |
| p.Ser8Ile  | VUS | -0.01  | Neutral       | 0.20 | Benign     | -5.85 | Benign   | 0.21 | Neutral | 0.97 | Probably damaging | 0    | Deleterious | 19.43 | Deleterious |
| p.Ser8Met  | VUS | -0.01  | Neutral       | 0.29 | Benign     | -6.03 | Benign   | 0.28 | Neutral | 0.98 | Probably damaging | 0    | Deleterious |       |             |
| p.Ser8His  | VUS | -0.01  | Neutral       | 0.18 | Benign     | -6.03 | Benign   | 0.28 | Neutral | 0.98 | Probably damaging | 0    | Deleterious |       |             |
| p.Ser8Gln  | VUS | -0.02  | Neutral       | 0.22 | Benign     | -5.47 | Benign   | 0.26 | Neutral | 0.98 | Probably damaging | 0    | Deleterious |       |             |
| p.Ser8Pro  | VUS | -0.80  | Neutral       | 0.08 | Benign     | -3.55 | Benign   | 0.20 | Neutral | 0.93 | Possibly damaging | 0    | Deleterious |       |             |
| p.Ser8Leu  | VUS | -0.43  | Neutral       | 0.17 | Benign     | -4.58 | Benign   | 0.23 | Neutral | 0.93 | Possibly damaging | 0    | Deleterious |       |             |
| p.Ser8Asp  | VUS | -0.03  | Neutral       | 0.18 | Benign     | -4.38 | Benign   | 0.26 | Neutral | 0.93 | Possibly damaging | 0    | Deleterious |       |             |
| p.Ser8Glu  | VUS | 0.00   | Neutral       | 0.18 | Benign     | -4.18 | Benign   | 0.26 | Neutral | 0.93 | Possibly damaging | 0    | Deleterious |       |             |
| p.Ser8Ala  | VUS | -0.09  | Neutral       | 0.07 | Benign     | -2.85 | Benign   | 0.18 | Neutral | 0.71 | Possibly damaging | 0    | Deleterious |       |             |
| p.Ser8Gly  | VUS | -0.42  | Neutral       | 0.07 | Benign     | -3.03 | Benign   | 0.16 | Neutral | 0.81 | Possibly damaging | 0    | Deleterious | 11.53 | Neutral     |
| p.Ser8Val  | VUS | -0.03  | Neutral       | 0.15 | Benign     | -4.45 | Benign   | 0.27 | Neutral | 0.93 | Possibly damaging | 0    | Deleterious |       |             |
| p.Ser8Tyr  | VUS | -0.01  | Neutral       | 0.18 | Benign     | -6.89 | Benign   | 0.25 | Neutral | 0.98 | Probably damaging | 0    | Deleterious |       |             |
| p.Ser8Cys  | VUS | 0.00   | Neutral       | 0.12 | Benign     | -5.77 | Benign   | 0.22 | Neutral | 0.99 | Probably damaging | 0    | Deleterious | 19.53 | Deleterious |
| p.Ser8Trp  | VUS | 0.00   | Neutral       | 0.17 | Benign     | -5.94 | Benign   | 0.32 | Neutral | 0.99 | Probably damaging | 0    | Deleterious |       |             |
| p.Ser8Phe  | VUS | -0.23  | Neutral       | 0.18 | Benign     | -6.25 | Benign   | 0.24 | Neutral | 0.98 | Probably damaging | 0    | Deleterious |       |             |
| p.Met9Asn  | VUS | -0.21  | Neutral       | 0.28 | Benign     | -4.02 | Benign   | 0.33 | Neutral | 0.13 | Benign            | 0.49 | Tolerated   |       |             |
| p.Met9Lys  | VUS | -0.23  | Neutral       | 0.13 | Benign     | -3.57 | Benign   | 0.35 | Neutral | 0.04 | Benign            | 0.52 | Tolerated   | 10.96 | Neutral     |
| p.Met9Thr  | VUS | -0.27  | Neutral       | 0.11 | Benign     | -1.57 | Benign   | 0.17 | Neutral | 0.00 | Benign            | 0.51 | Tolerated   | 9.04  | Neutral     |
| p.Met9Arg  | VUS | -0.07  | Neutral       | 0.08 | Benign     | -1.77 | Benign   | 0.33 | Neutral | 0.10 | Benign            | 0.31 | Tolerated   | 11.88 | Neutral     |
| p.Met9Ser  | VUS | -1.02  | Neutral       | 0.14 | Benign     | -1.00 | Benign   | 0.33 | Neutral | 0.01 | Benign            | 0.6  | Tolerated   |       |             |
| p.Met9Ile  | VUS | -0.29  | Neutral       | 0.33 | Benign     | -3.66 | Benign   | 0.27 | Neutral | 0.04 | Benign            | 0.36 | Tolerated   | 14.95 | Neutral     |
| p.Met9His  | VUS | -0.70  | Neutral       | 0.19 | Benign     | -3.54 | Benign   | 0.33 | Neutral | 0.76 | Possibly damaging | 0.21 | Tolerated   |       |             |
| p.Met9Gln  | VUS | -0.37  | Neutral       | 0.08 | Benign     | -2.68 | Benign   | 0.30 | Neutral | 0.23 | Benign            | 0.42 | Tolerated   |       |             |
| p.Met9Pro  | VUS | -0.63  | Neutral       | 0.12 | Benign     | -0.65 | Benign   | 0.35 | Neutral | 0.23 | Benign            | 0.28 | Tolerated   |       |             |
| p.Met9Leu  | VUS | -0.01  | Neutral       | 0.12 | Benign     | -1.65 | Benign   | 0.21 | Neutral | 0.00 | Benign            | 0.68 | Tolerated   | 6.18  | Neutral     |
| p.Met9Asp  | VUS | -0.13  | Neutral       | 0.21 | Benign     | -2.24 | Benign   | 0.33 | Neutral | 0.13 | Benign            | 0.77 | Tolerated   |       |             |
| p.Met9Glu  | VUS | -0.05  | Neutral       | 0.12 | Benign     | -1.93 | Benign   | 0.35 | Neutral | 0.06 | Benign            | 1    | Tolerated   |       |             |
| p.Met9Ala  | VUS | -0.12  | Neutral       | 0.11 | Benign     | -0.64 | Benign   | 0.32 | Neutral | 0.01 | Benign            | 0.68 | Tolerated   |       |             |
| p.Met9Gly  | VUS | -0.35  | Neutral       | 0.10 | Benign     | -1.14 | Benign   | 0.28 | Neutral | 0.06 | Benign            | 0.44 | Tolerated   |       |             |
| p.Met9Val  | VUS | -0.46  | Neutral       | 0.07 | Benign     | -2.11 | Benign   | 0.22 | Neutral | 0.00 | Benign            | 0.43 | Tolerated   | 9.64  | Neutral     |
| p.Met9Tyr  | VUS | -0.02  | Neutral       | 0.31 | Benign     | -4.70 | Benign   | 0.34 | Neutral | 0.47 | Possibly damaging | 0.24 | Tolerated   |       |             |
| p.Met9Cys  | VUS | -0.13  | Neutral       | 0.30 | Benign     | -3.72 | Benign   | 0.34 | Neutral | 0.76 | Possibly damaging | 0.09 | Tolerated   |       |             |
| p.Met9Trp  | VUS | -0.13  | Neutral       | 0.25 | Benign     | -3.88 | Benign   | 0.37 | Neutral | 0.76 | Possibly damaging | 0.06 | Tolerated   |       |             |
| p.Met9Phe  | VUS | -0.23  | Neutral       | 0.17 | Benign     | -4.09 | Benign   | 0.33 | Neutral | 0.23 | Benign            | 0.24 | Tolerated   |       |             |
| p.Glu10Asn | VUS | -2.65  | Neutral       | 0.33 | Benign     | -6.10 | Benign   | 0.30 | Neutral | 0.26 | Benign            | 0    | Deleterious |       |             |
| p.Glu10Lys | VUS | -33.21 | Indeterminate | 0.26 | Benign     | -5.90 | Benign   | 0.25 | Neutral | 0.35 | Benign            | 0    | Deleterious | 13.32 | Neutral     |
| p.Glu10Thr | VUS | -5.04  | Neutral       | 0.22 | Benign     | -4.77 | Benign   | 0.30 | Neutral | 0.59 | Possibly damaging | 0    | Deleterious |       |             |
| p.Glu10Arg | VUS | -0.85  | Neutral       | 0.20 | Benign     | -4.48 | Benign   | 0.25 | Neutral | 0.83 | Possibly damaging | 0    | Deleterious |       |             |
| p.Glu10Ser | VUS | -22.02 | Indeterminate | 0.21 | Benign     | -4.04 | Benign   | 0.31 | Neutral | 0.41 | Benign            | 0    | Deleterious |       |             |
| p.Glu10Ile | VUS | -13.01 | Indeterminate | 0.38 | Ambiguous  | -6.67 | Benign   | 0.33 | Neutral | 0.94 | Possibly damaging | 0    | Deleterious |       |             |
| p.Glu10Met | VUS | -9.12  | Indeterminate | 0.50 | Ambiguous  | -6.58 | Benign   | 0.36 | Neutral | 0.98 | Probably damaging | 0    | Deleterious |       |             |
| p.Glu10His | VUS | -32.21 | Indeterminate | 0.31 | Benign     | -5.89 | Benign   | 0.31 | Neutral | 0.94 | Possibly damaging | 0    | Deleterious |       |             |
| p.Glu10Gln | VUS | -0.37  | Neutral       | 0.12 | Benign     | -5.01 | Benign   | 0.22 | Neutral | 0.52 | Possibly damaging | 0    | Deleterious | 11.32 | Neutral     |
| p.Glu10Pro | VUS | -0.83  | Neutral       | 0.20 | Benign     | -3.49 | Benign   | 0.35 | Neutral | 0.94 | Possibly damaging | 0    | Deleterious |       |             |
| p.Glu10Leu | VUS | -5.49  | Neutral       | 0.30 | Benign     | -4.45 | Benign   | 0.30 | Neutral | 0.83 | Possibly damaging | 0    | Deleterious |       |             |
| p.Glu10Asp | VUS | -2.12  | Neutral       | 0.16 | Benign     | -3.82 | Benign   | 0.14 | Neutral | 0.00 | Benign            | 0    | Deleterious | 3.76  | Neutral     |
| p.Glu10Ala | VUS | -32.81 | Indeterminate | 0.12 | Benign     | -3.21 | Benign   | 0.23 | Neutral | 0.35 | Benign            | 0    | Deleterious | 11.44 | Neutral     |
| p.Glu10Gly | VUS | -1.38  | Neutral       | 0.15 | Benign     | -2.92 | Benign   | 0.21 | Neutral | 0.35 | Benign            | 0    | Deleterious | 13.55 | Neutral     |
| p.Glu10Val | VUS | -1.13  | Neutral       | 0.22 | Benign     | -4.69 | Benign   | 0.26 | Neutral | 0.79 | Possibly damaging | 0    | Deleterious | 12.78 | Neutral     |
| p.Glu10Tyr | VUS | -2.56  | Neutral       | 0.45 | Ambiguous  | -6.99 | Benign   | 0.32 | Neutral | 0.94 | Possibly damaging | 0    | Deleterious |       |             |
| p.Glu10Cys | VUS | -1.13  | Neutral       | 0.77 | Pathogenic | -6.29 | Benign   | 0.34 | Neutral | 0.98 | Probably damaging | 0    | Deleterious |       |             |
| p.Glu10Trp | VUS | -1.25  | Neutral       | 0.76 | Pathogenic | -6.63 | Benign   | 0.36 | Neutral | 0.98 | Probably damaging | 0    | Deleterious |       |             |
| p.Glu10Phe | VUS | -2.65  | Neutral       | 0.53 | Ambiguous  | -6.37 | Benign   | 0.33 | Neutral | 0.94 | Possibly damaging | 0    | Deleterious |       |             |
| p.Pro11Asn | VUS | -1.32  | Neutral       | 0.32 | Benign     | -6.47 | Benign   | 0.27 | Neutral | 0.02 | Benign            | 0.04 | Deleterious |       |             |
| p.Pro11Lys | VUS | -4.63  | Neutral       | 0.28 | Benign     | -7.00 | Benign   | 0.25 | Neutral | 0.12 | Benign            | 0.03 | Deleterious |       |             |
| p.Pro11Thr | VUS | -8.84  | Indeterminate | 0.10 | Benign     | -4.72 | Benign   | 0.36 | Neutral | 0.00 | Benign            | 0.08 | Tolerated   | 12.11 | Neutral     |
| p.Pro11Arg | VUS | -1.90  | Neutral       | 0.14 | Benign     | -4.49 | Benign   | 0.18 | Neutral | 0.26 | Benign            | 0.02 | Deleterious | 15.68 | Deleterious |
| p.Pro11Ser | VUS | -2.27  | Neutral       | 0.13 | Benign     | -3.34 | Benign   | 0.19 | Neutral | 0.00 | Benign            | 0.39 | Tolerated   | 13.98 | Neutral     |
| p.Pro11Ile | VUS | -1.45  | Neutral       | 0.27 | Benign     | -6.46 | Benign   | 0.29 | Neutral | 0.06 | Benign            | 0.01 | Deleterious |       |             |
| p.Pro11Met | VUS | -0.32  | Neutral       | 0.35 | Ambiguous  | -6.10 | Benign   | 0.28 | Neutral | 0.15 | Benign            | 0.01 | Deleterious |       |             |
| p.Pro11His | VUS | -1.60  | Neutral       | 0.21 | Benign     | -6.18 | Benign   | 0.21 | Neutral | 0.45 | Benign            | 0.01 | Deleterious | 16.24 | Deleterious |
| p.Pro11Gln | VUS | -0.33  | Neutral       | 0.16 | Benign     | -5.73 | Benign   | 0.28 | Neutral | 0.26 | Benign            | 0.02 | Deleterious |       |             |
| p.Pro11Leu | VUS | -1.78  | Neutral       | 0.17 | Benign     | -4.57 | Benign   | 0.17 | Neutral | 0.00 | Benign            | 0.02 | Deleterious | 16.66 | Deleterious |
| p.Pro11Asp | VUS | -0.52  | Neutral       | 0.29 | Benign     | -4.51 | Benign   | 0.27 | Neutral | 0.01 | Benign            | 0.03 | Deleterious |       |             |
| p.Pro11Glu | VUS | -0.68  | Neutral       | 0.20 | Benign     | -4.43 | Benign   | 0.28 | Neutral | 0.00 | Benign            | 0.03 | Deleterious |       |             |
| p.Pro11Ala | VUS | -0.43  | Neutral       | 0.07 | Benign     | -3.36 | Benign   | 0.24 | Neutral | 0.00 | Benign            | 0.12 | Tolerated   | 8.49  | Neutral     |
| p.Pro11Gly | VUS | -1.89  | Neutral       | 0.19 | Benign     | -3.65 | Benign   | 0.27 | Neutral | 0.03 | Benign            | 0.07 | Tolerated   |       |             |
| p.Pro11Val | VUS | -0.96  | Neutral       | 0.16 | Benign     | -4.78 | Benign   | 0.27 | Neutral | 0.01 | Benign            | 0.03 | Deleterious |       |             |
| p.Pro11Tyr | VUS | -2.83  | Neutral       | 0.35 | Ambiguous  | -6.83 | Benign</ |      |         |      |                   |      |             |       |             |

|            |            |        |               |      |            |        |              |      |         |      |                   |      |             |       |             |
|------------|------------|--------|---------------|------|------------|--------|--------------|------|---------|------|-------------------|------|-------------|-------|-------------|
| p.Ser12Leu | VUS        | -28.42 | Indeterminate | 0.23 | Benign     | -3.77  | Benign       | 0.16 | Neutral | 0.00 | Benign            | 0.19 | Tolerated   | 17.06 | Deleterious |
| p.Ser12Asp | VUS        | -0.01  | Neutral       | 0.26 | Benign     | -3.26  | Benign       | 0.28 | Neutral | 0.06 | Benign            | 0.17 | Tolerated   |       |             |
| p.Ser12Glu | VUS        | -1.21  | Neutral       | 0.30 | Benign     | -3.82  | Benign       | 0.28 | Neutral | 0.04 | Benign            | 0.18 | Tolerated   |       |             |
| p.Ser12Ala | VUS        | -0.70  | Neutral       | 0.08 | Benign     | -1.94  | Benign       | 0.15 | Neutral | 0.00 | Benign            | 1    | Tolerated   | 8.47  | Neutral     |
| p.Ser12Gly | VUS        | -0.16  | Neutral       | 0.09 | Benign     | -3.33  | Benign       | 0.16 | Neutral | 0.14 | Benign            | 0.53 | Tolerated   |       |             |
| p.Ser12Val | VUS        | -4.85  | Neutral       | 0.25 | Benign     | -4.02  | Benign       | 0.21 | Neutral | 0.01 | Benign            | 0.25 | Tolerated   |       |             |
| p.Ser12Tyr | VUS        | -0.13  | Neutral       | 0.28 | Benign     | -6.41  | Benign       | 0.24 | Neutral | 0.44 | Benign            | 0.15 | Tolerated   |       |             |
| p.Ser12Cys | VUS        | -2.60  | Neutral       | 0.15 | Benign     | -5.63  | Benign       | 0.23 | Neutral | 0.39 | Benign            | 0.12 | Tolerated   |       |             |
| p.Ser12Trp | VUS        | -3.60  | Neutral       | 0.30 | Benign     | -6.43  | Benign       | 0.24 | Neutral | 0.95 | Possibly damaging | 0.05 | Deleterious | 20.80 | Deleterious |
| p.Ser12Phe | VUS        | -1.39  | Neutral       | 0.35 | Ambiguous  | -6.44  | Benign       | 0.24 | Neutral | 0.28 | Benign            | 0.13 | Tolerated   |       |             |
| p.Ala13Asn | VUS        | 0.00   | Neutral       | 0.44 | Ambiguous  | -6.94  | Benign       | 0.29 | Neutral | 0.09 | Benign            | 0.02 | Deleterious |       |             |
| p.Ala13Lys | VUS        | -0.10  | Neutral       | 0.62 | Pathogenic | -7.44  | Benign       | 0.49 | Neutral | 0.65 | Possibly damaging | 0.02 | Deleterious |       |             |
| p.Ala13Thr | VUS        | -0.02  | Neutral       | 0.17 | Benign     | -5.53  | Benign       | 0.43 | Neutral | 0.33 | Benign            | 0.04 | Deleterious | 23.30 | Deleterious |
| p.Ala13Arg | VUS        | 0.00   | Neutral       | 0.39 | Ambiguous  | -5.27  | Benign       | 0.48 | Neutral | 0.93 | Possibly damaging | 0.02 | Deleterious |       |             |
| p.Ala13Ser | VUS        | 0.00   | Neutral       | 0.13 | Benign     | -4.23  | Benign       | 0.43 | Neutral | 0.03 | Benign            | 0.11 | Tolerated   | 21.70 | Deleterious |
| p.Ala13Ile | VUS        | -0.01  | Neutral       | 0.50 | Ambiguous  | -8.08  | Pathogenic   | 0.49 | Neutral | 0.93 | Possibly damaging | 0.01 | Deleterious |       |             |
| p.Ala13Met | VUS        | -0.82  | Neutral       | 0.55 | Ambiguous  | -7.42  | Benign       | 0.45 | Neutral | 0.99 | Possibly damaging | 0.01 | Deleterious |       |             |
| p.Ala13His | VUS        | -0.17  | Neutral       | 0.51 | Ambiguous  | -6.96  | Benign       | 0.46 | Neutral | 0.99 | Possibly damaging | 0.01 | Deleterious |       |             |
| p.Ala13Gln | VUS        | -0.02  | Neutral       | 0.39 | Ambiguous  | -5.95  | Benign       | 0.47 | Neutral | 0.87 | Possibly damaging | 0.02 | Deleterious |       |             |
| p.Ala13Pro | VUS        | 0.00   | Neutral       | 0.11 | Benign     | -4.31  | Benign       | 0.53 | Disease | 0.73 | Possibly damaging | 0.05 | Deleterious | 23.60 | Deleterious |
| p.Ala13Leu | VUS        | -0.18  | Neutral       | 0.35 | Ambiguous  | -6.06  | Benign       | 0.33 | Neutral | 0.79 | Possibly damaging | 0.02 | Deleterious |       |             |
| p.Ala13Asp | VUS        | -0.01  | Neutral       | 0.37 | Ambiguous  | -4.88  | Benign       | 0.33 | Neutral | 0.00 | Benign            | 0.02 | Deleterious | 15.22 | Deleterious |
| p.Ala13Glu | VUS        | -0.01  | Neutral       | 0.32 | Benign     | -4.65  | Benign       | 0.46 | Neutral | 0.03 | Benign            | 0.02 | Deleterious |       |             |
| p.Ala13Gly | VUS        | 0.00   | Neutral       | 0.14 | Benign     | -2.03  | Benign       | 0.26 | Neutral | 0.00 | Benign            | 1    | Tolerated   | 10.78 | Neutral     |
| p.Ala13Val | VUS        | -0.05  | Neutral       | 0.25 | Benign     | -5.39  | Benign       | 0.28 | Neutral | 0.52 | Possibly damaging | 0.03 | Deleterious | 16.07 | Deleterious |
| p.Ala13Tyr | VUS        | -1.26  | Neutral       | 0.58 | Pathogenic | -8.64  | Pathogenic   | 0.50 | Neutral | 0.98 | Possibly damaging | 0.01 | Deleterious |       |             |
| p.Ala13Cys | VUS        | -0.59  | Neutral       | 0.54 | Ambiguous  | -6.73  | Benign       | 0.44 | Neutral | 0.98 | Possibly damaging | 0.02 | Deleterious |       |             |
| p.Ala13Trp | VUS        | -0.39  | Neutral       | 0.66 | Pathogenic | -6.89  | Benign       | 0.56 | Disease | 0.99 | Possibly damaging | 0    | Deleterious |       |             |
| p.Ala13Phe | VUS        | -0.31  | Neutral       | 0.51 | Ambiguous  | -8.31  | Pathogenic   | 0.50 | Neutral | 0.98 | Possibly damaging | 0.01 | Deleterious |       |             |
| p.Asp14Asn | VUS        | -3.70  | Neutral       | 0.26 | Benign     | -6.07  | Benign       | 0.45 | Neutral | 0.87 | Possibly damaging | 0.51 | Tolerated   | 23.20 | Deleterious |
| p.Asp14Lys | VUS        | -2.50  | Neutral       | 0.72 | Pathogenic | -7.26  | Benign       | 0.38 | Neutral | 0.97 | Possibly damaging | 0.05 | Deleterious |       |             |
| p.Asp14Thr | VUS        | -0.45  | Neutral       | 0.43 | Ambiguous  | -5.05  | Benign       | 0.55 | Disease | 0.90 | Possibly damaging | 0.03 | Deleterious |       |             |
| p.Asp14Arg | VUS        | -15.07 | Indeterminate | 0.53 | Ambiguous  | -4.63  | Benign       | 0.55 | Disease | 0.99 | Possibly damaging | 0.02 | Deleterious |       |             |
| p.Asp14Ser | VUS        | -0.40  | Neutral       | 0.25 | Benign     | -3.92  | Benign       | 0.50 | Disease | 0.94 | Possibly damaging | 0.06 | Tolerated   |       |             |
| p.Asp14Ile | VUS        | -31.69 | Indeterminate | 0.67 | Pathogenic | -7.71  | Pathogenic   | 0.55 | Disease | 0.99 | Possibly damaging | 0.01 | Deleterious |       |             |
| p.Asp14Met | VUS        | -21.59 | Indeterminate | 0.87 | Pathogenic | -7.47  | Benign       | 0.58 | Disease | 1.00 | Possibly damaging | 0    | Deleterious |       |             |
| p.Asp14His | VUS        | -0.67  | Neutral       | 0.44 | Ambiguous  | -5.88  | Benign       | 0.50 | Disease | 0.99 | Possibly damaging | 0.02 | Deleterious | 24.40 | Deleterious |
| p.Asp14Gln | VUS        | -1.64  | Neutral       | 0.50 | Ambiguous  | -5.12  | Benign       | 0.45 | Neutral | 0.96 | Possibly damaging | 0.04 | Deleterious |       |             |
| p.Asp14Pro | VUS        | -33.22 | Indeterminate | 0.62 | Pathogenic | -4.81  | Benign       | 0.40 | Neutral | 0.73 | Possibly damaging | 0.03 | Deleterious |       |             |
| p.Asp14Leu | VUS        | -11.64 | Indeterminate | 0.59 | Pathogenic | -5.32  | Benign       | 0.58 | Disease | 0.99 | Possibly damaging | 0.01 | Deleterious |       |             |
| p.Asp14Glu | VUS        | -1.99  | Neutral       | 0.28 | Benign     | -3.12  | Benign       | 0.23 | Neutral | 0.00 | Benign            | 0.23 | Tolerated   | 15.97 | Deleterious |
| p.Asp14Ala | VUS        | -10.01 | Indeterminate | 0.30 | Benign     | -3.02  | Benign       | 0.30 | Neutral | 0.14 | Benign            | 0.04 | Deleterious | 19.29 | Deleterious |
| p.Asp14Gly | VUS        | -0.82  | Neutral       | 0.31 | Benign     | -3.87  | Benign       | 0.51 | Disease | 0.96 | Possibly damaging | 0.08 | Tolerated   | 22.80 | Deleterious |
| p.Asp14Val | VUS        | -31.29 | Indeterminate | 0.46 | Ambiguous  | -5.24  | Benign       | 0.60 | Disease | 0.82 | Possibly damaging | 0.01 | Deleterious | 22.80 | Deleterious |
| p.Asp14Tyr | VUS        | -18.85 | Indeterminate | 0.41 | Ambiguous  | -8.06  | Pathogenic   | 0.54 | Disease | 1.00 | Possibly damaging | 0.01 | Deleterious | 24.80 | Deleterious |
| p.Asp14Cys | VUS        | -1.62  | Neutral       | 0.78 | Pathogenic | -6.51  | Benign       | 0.56 | Disease | 1.00 | Possibly damaging | 0.01 | Deleterious |       |             |
| p.Asp14Trp | VUS        | -19.43 | Indeterminate | 0.88 | Pathogenic | -7.13  | Benign       | 0.59 | Disease | 1.00 | Possibly damaging | 0    | Deleterious |       |             |
| p.Asp14Phe | VUS        | -21.99 | Indeterminate | 0.76 | Pathogenic | -7.76  | Pathogenic   | 0.58 | Disease | 1.00 | Possibly damaging | 0.01 | Deleterious |       |             |
| p.Trp15Asn | VUS        | -4.97  | Neutral       | 0.23 | Benign     | -3.04  | Benign       | 0.27 | Neutral | 0.89 | Possibly damaging | 0.28 | Tolerated   |       |             |
| p.Trp15Lys | VUS        | -2.58  | Neutral       | 0.23 | Benign     | -2.62  | Benign       | 0.26 | Neutral | 0.01 | Benign            | 1    | Tolerated   |       |             |
| p.Trp15Thr | VUS        | -11.33 | Indeterminate | 0.08 | Benign     | -1.18  | Benign       | 0.30 | Neutral | 0.64 | Possibly damaging | 0.31 | Tolerated   |       |             |
| p.Trp15Arg | VUS        | -1.65  | Neutral       | 0.11 | Benign     | 0.64   | Benign       | 0.12 | Neutral | 0.01 | Benign            | 0.78 | Tolerated   | 0.23  | Neutral     |
| p.Trp15Ser | VUS        | -2.11  | Neutral       | 0.06 | Benign     | 0.17   | Benign       | 0.19 | Neutral | 0.08 | Benign            | 0.34 | Tolerated   | 8.05  | Neutral     |
| p.Trp15Ile | VUS        | -1.10  | Neutral       | 0.16 | Benign     | -4.07  | Benign       | 0.31 | Neutral | 0.49 | Possibly damaging | 0.12 | Tolerated   |       |             |
| p.Trp15Met | VUS        | -1.86  | Neutral       | 0.26 | Benign     | -3.17  | Benign       | 0.25 | Neutral | 0.44 | Benign            | 0.08 | Tolerated   |       |             |
| p.Trp15His | VUS        | -23.94 | Indeterminate | 0.15 | Benign     | -2.56  | Benign       | 0.33 | Neutral | 0.99 | Possibly damaging | 0.16 | Tolerated   |       |             |
| p.Trp15Gln | VUS        | -4.61  | Neutral       | 0.17 | Benign     | -0.15  | Benign       | 0.22 | Neutral | 0.10 | Benign            | 0.44 | Tolerated   |       |             |
| p.Trp15Pro | VUS        | -27.76 | Indeterminate | 0.31 | Benign     | 1.37   | Benign       | 0.32 | Neutral | 0.98 | Possibly damaging | 0.18 | Tolerated   |       |             |
| p.Trp15Leu | VUS        | -0.52  | Neutral       | 0.10 | Benign     | -0.60  | Benign       | 0.18 | Neutral | 0.01 | Benign            | 0.23 | Tolerated   | 9.65  | Neutral     |
| p.Trp15Asp | VUS        | -0.47  | Neutral       | 0.11 | Benign     | 0.24   | Benign       | 0.28 | Neutral | 0.89 | Possibly damaging | 0.26 | Tolerated   |       |             |
| p.Trp15Glu | VUS        | -0.29  | Neutral       | 0.09 | Benign     | 0.93   | Benign       | 0.26 | Neutral | 0.10 | Benign            | 0.53 | Tolerated   |       |             |
| p.Trp15Ala | VUS        | -1.52  | Neutral       | 0.04 | Benign     | 1.49   | Benign       | 0.31 | Neutral | 0.03 | Benign            | 0.37 | Tolerated   |       |             |
| p.Trp15Gly | VUS        | -9.01  | Indeterminate | 0.05 | Benign     | -0.71  | Benign       | 0.20 | Neutral | 0.57 | Possibly damaging | 0.23 | Tolerated   | 1.39  | Neutral     |
| p.Trp15Val | VUS        | -1.17  | Neutral       | 0.09 | Benign     | -1.43  | Benign       | 0.32 | Neutral | 0.64 | Possibly damaging | 0.18 | Tolerated   |       |             |
| p.Trp15Tyr | VUS        | -5.94  | Indeterminate | 0.24 | Benign     | -5.65  | Benign       | 0.24 | Neutral | 0.74 | Possibly damaging | 0.12 | Tolerated   |       |             |
| p.Trp15Cys | VUS        | -5.76  | Neutral       | 0.44 | Ambiguous  | -3.13  | Benign       | 0.30 | Neutral | 0.99 | Possibly damaging | 0.04 | Deleterious | 22.95 | Deleterious |
| p.Trp15Phe | VUS        | -0.61  | Neutral       | 0.14 | Benign     | -4.96  | Benign       | 0.25 | Neutral | 0.86 | Possibly damaging | 0.08 | Tolerated   |       |             |
| p.Leu16Asn | VUS        | -53.15 | Deleterious   | 0.97 | Pathogenic | -15.85 | Pathogenic   | 0.80 | Disease | 1.00 | Possibly damaging | 0    | Deleterious |       |             |
| p.Leu16Lys | VUS        | -53.15 | Deleterious   | 0.93 | Pathogenic | -15.37 | Pathogenic   | 0.80 | Disease | 0.99 | Possibly damaging | 0    | Deleterious |       |             |
| p.Leu16Thr | VUS        | -27.55 | Indeterminate | 0.83 | Pathogenic | -12.66 | Pathogenic   | 0.79 | Disease | 1.00 | Possibly damaging | 0    | Deleterious |       |             |
| p.Leu16Arg | Pathogenic | -53.15 | Deleterious   | 0.84 | Pathogenic | -11.98 | Pathogenic   | 0.92 | Disease | 1.00 | Possibly damaging | 0    | Deleterious | 22.80 | Deleterious |
| p.Leu16Ser | VUS        | -53.15 | Deleterious   | 0.97 | Pathogenic | -12.29 | Pathogenic   | 0.89 | Disease | 1.00 | Possibly damaging | 0    | Deleterious |       |             |
| p.Leu16Ile | VUS        | -6.96  | Indeterminate | 0.23 | Benign     | -9.94  | Pathogenic   | 0.53 | Disease | 1.00 | Possibly damaging | 0    | Deleterious |       |             |
| p.Leu16Met | VUS        | -2.63  | Neutral       | 0.60 | Pathogenic | -9.00  | Pathogenic   | 0.66 | Disease | 1.00 | Possibly damaging | 0    | Deleterious | 20.30 | Deleterious |
| p.Leu16His | VUS        | -53.15 | Deleterious   | 0.97 | Pathogenic | -12.95 | Pathogenic   | 0.86 | Disease | 1.00 | Possibly damaging | 0    | Deleterious |       |             |
| p.Leu16Gln | VUS        | -53.15 | Deleterious   | 0.92 | Pathogenic | -12.59 | Pathogenic   | 0.74 | Disease | 1.00 | Possibly damaging | 0    | Deleterious | 22.60 | Deleterious |
| p.Leu16Pro | Pathogenic | -53.15 | Deleterious   | 0.87 | Pathogenic | -9.98  | Pathogenic   | 0.94 | Disease | 1.00 | Possibly damaging | 0    | Deleterious | 22.70 | Deleterious |
| p.Leu16Asp | VUS        | -53.15 | Deleterious   | 0.99 | Pathogenic | -14.19 | Pathogenic   | 0.80 | Disease | 1.00 | Possibly damaging | 0    | Deleterious |       |             |
| p.Leu16Glu | VUS        | -53.15 | Deleterious   | 0.94 | Pathogenic | -13.68 | Pathogenic   | 0.82 | Disease | 1.00 | Possibly damaging | 0    | Deleterious |       |             |
| p.Leu16Ala | VUS        | -53.15 | Deleterious   | 0.85 | Pathogenic | -11.52 | Pathogenic   | 0.78 | Disease | 1.00 | Possibly damaging | 0    | Deleterious |       |             |
| p.Leu16Gly | VUS        | -53.15 | Deleterious   | 0.95 | Pathogenic | -12.24 | Pathogenic   | 0.81 | Disease | 1.00 | Possibly damaging | 0    | Deleterious |       |             |
| p.Leu16Val | VUS        | -14.21 | Indeterminate | 0.29 | Benign     | -9.22  | Pathogenic   | 0.61 | Disease | 0.98 | Possibly damaging | 0    | Deleterious | 19.96 | Deleterious |
| p.Leu16Tyr | VUS        | -53.15 | Deleterious   | 0.97 | Pathogenic | -13.00 | Pathogenic   | 0.75 | Disease | 0.92 | Possibly damaging | 0    | Deleterious |       |             |
| p.Leu16Cys | VUS        | -16.70 | Indeterminate | 0.97 | Pathogenic | -12.75 | Pathogenic   | 0.74 | Disease | 1.00 | Possibly damaging | 0    | Deleterious |       |             |
| p.Leu16Trp | VUS        | -53.15 | Deleterious   | 0.95 | Pathogenic | -11.31 | Pathogenic   | 0.81 | Disease | 0.78 | Possibly damaging | 0    | Deleterious |       |             |
| p.Leu16Phe | VUS        | -4.61  | Neutral       | 0.87 | Pathogenic | -9.34  | Pathogenic   | 0.67 | Disease | 0.99 | Possibly damaging | 0    | Deleterious |       |             |
| p.Ala17Asn | VUS        | -9.84  | Indeterminate | 0.69 | Pathogenic | -9.33  | Pathogenic   | 0.50 | Neutral | 0.74 | Possibly damaging | 0.31 | Tolerated   |       |             |
| p.Ala17Lys | VUS        | -53.15 | Deleterious   | 0.93 | Pathogenic | -14.13 | Pathogenic   | 0.55 | Disease | 0.99 | Possibly damaging | 0.34 | Tolerated   |       |             |
| p.Ala17Thr | VUS        | -4.30  | Neutral       | 0.33 | Benign     | -5.99  | Benign       | 0.20 | Neutral | 0.04 | Benign            | 1    | Tolerated   | 8.81  | Neutral     |
| p.Ala17Arg | VUS        | -53.15 | Deleterious   | 0.77 | Pathogenic | -7.44  | Benign       | 0.52 | Disease | 0.99 | Possibly damaging | 0.26 | Tolerated   |       |             |
| p.Ala17Ser | VUS        | -1.96  | Neutral       | 0.15 | Benign     | -1.74  | Benign       | 0.20 | Neutral | 0.01 | Benign            | 0.86 | Tolerated   | 7.00  | Neutral     |
| p.Ala17Ile | VUS        | -9.63  | Indeterminate | 0.73 | Pathogenic | -11.13 | Pathogenic   | 0.48 | Neutral | 0.99 | Possibly damaging | 0.24 | Tolerated   |       |             |
| p.Ala17Met | VUS        | -53.15 | Deleterious   | 0.64 | Pathogenic | -10.49 | Pathogenic   | 0.44 | Neutral | 1.00 | Possibly damaging | 0.12 | Tolerated   |       |             |
| p.Ala17His | VUS        | -2.96  | Neutral       | 0.64 | Pathogenic | -9.79  | Pathogenic   | 0.51 | Disease | 1.00 | Possibly damaging | 0.3  | Tolerated   |       |             |
| p.Ala17Gln | VUS        | -53.15 | Deleterious   | 0.64 | Pathogenic | -10.72 | Pathogenic   | 0.50 | Neutral | 1.00 | Possibly damaging | 0.25 | Tolerated   |       |             |
| p.Ala17Pro | VUS        | -1.63  | Neutral       | 0.70 | Pathogenic | -8.27  | Pathogenic   | 0.59 | Disease | 0.97 | Possibly damaging | 0.22 | Tolerated   | 18.05 | Deleterious |
| p.Ala17Leu | VUS        | -53.15 | Deleterious   | 0.46 | Ambiguous  | -8.16  | Pathogenic</ |      |         |      |                   |      |             |       |             |

|            |                   |        |               |        |            |        |            |      |         |      |                   |      |             |       |             |
|------------|-------------------|--------|---------------|--------|------------|--------|------------|------|---------|------|-------------------|------|-------------|-------|-------------|
| p.Thr18His | VUS               | -10.39 | Indeterminate | 0.27   | Benign     | -4.59  | Benign     | 0.33 | Neutral | 0.99 | Probably damaging | 0.13 | Tolerated   |       |             |
| p.Thr18Gln | VUS               | -10.00 | Indeterminate | 0.23   | Benign     | -2.84  | Benign     | 0.25 | Neutral | 0.84 | Possibly damaging | 0.55 | Tolerated   |       |             |
| p.Thr18Pro | VUS               | -53.15 | Deleterious   | 0.32   | Benign     | -5.58  | Benign     | 0.31 | Neutral | 1.00 | Probably damaging | 0.27 | Tolerated   | 16.16 | Deleterious |
| p.Thr18Leu | VUS               | -29.34 | Indeterminate | 0.17   | Benign     | -3.26  | Benign     | 0.31 | Neutral | 0.62 | Possibly damaging | 0.28 | Tolerated   |       |             |
| p.Thr18Asp | VUS               | -12.03 | Indeterminate | 0.35   | Ambiguous  | -0.56  | Benign     | 0.30 | Neutral | 0.83 | Possibly damaging | 0.63 | Tolerated   |       |             |
| p.Thr18Glu | VUS               | -6.41  | Indeterminate | 0.27   | Benign     | 0.00   | Benign     | 0.34 | Neutral | 0.03 | Benign            | 1    | Tolerated   |       |             |
| p.Thr18Ala | VUS               | -32.50 | Indeterminate | 0.09   | Benign     | -1.41  | Benign     | 0.11 | Neutral | 0.00 | Benign            | 0.71 | Tolerated   | 4.84  | Neutral     |
| p.Thr18Gly | VUS               | -10.65 | Indeterminate | 0.18   | Benign     | -3.12  | Benign     | 0.34 | Neutral | 0.99 | Probably damaging | 0.44 | Tolerated   |       |             |
| p.Thr18Val | VUS               | -4.77  | Neutral       | 0.20   | Benign     | -3.12  | Benign     | 0.28 | Neutral | 0.54 | Possibly damaging | 0.27 | Tolerated   |       |             |
| p.Thr18Tyr | VUS               | -33.22 | Indeterminate | 0.37   | Ambiguous  | -7.10  | Benign     | 0.32 | Neutral | 1.00 | Probably damaging | 0.05 | Deleterious |       |             |
| p.Thr18Cys | VUS               | -1.62  | Neutral       | 0.52   | Ambiguous  | -4.88  | Benign     | 0.34 | Neutral | 1.00 | Probably damaging | 0.06 | Tolerated   |       |             |
| p.Thr18Trp | VUS               | -11.94 | Indeterminate | 0.56   | Ambiguous  | -5.04  | Benign     | 0.36 | Neutral | 1.00 | Probably damaging | 0.02 | Deleterious |       |             |
| p.Thr18Phe | VUS               | -16.79 | Indeterminate | 0.35   | Ambiguous  | -6.88  | Benign     | 0.32 | Neutral | 0.98 | Probably damaging | 0.05 | Deleterious |       |             |
| p.Ala19Asn | VUS               | 0.00   | Neutral       | 0.92   | Pathogenic | -10.76 | Pathogenic | 0.66 | Disease | 1.00 | Probably damaging | 0    | Deleterious |       |             |
| p.Ala19Lys | VUS               | -2.42  | Neutral       | 0.97   | Pathogenic | -11.61 | Pathogenic | 0.68 | Disease | 1.00 | Probably damaging | 0    | Deleterious |       |             |
| p.Ala19Thr | VUS               | 0.00   | Neutral       | 0.62   | Pathogenic | -8.56  | Pathogenic | 0.40 | Neutral | 1.00 | Probably damaging | 0    | Deleterious | 24.90 | Deleterious |
| p.Ala19Arg | VUS               | -0.43  | Neutral       | 0.90   | Pathogenic | -9.41  | Pathogenic | 0.69 | Disease | 1.00 | Probably damaging | 0    | Deleterious |       |             |
| p.Ala19Ser | VUS               | 0.00   | Neutral       | 0.30   | Benign     | -7.07  | Benign     | 0.63 | Disease | 0.99 | Probably damaging | 0    | Deleterious | 24.40 | Deleterious |
| p.Ala19Ile | VUS               | 0.00   | Neutral       | 0.93   | Pathogenic | -10.54 | Pathogenic | 0.71 | Disease | 1.00 | Probably damaging | 0    | Deleterious |       |             |
| p.Ala19Met | VUS               | 0.00   | Neutral       | 0.86   | Pathogenic | -9.74  | Pathogenic | 0.68 | Disease | 1.00 | Probably damaging | 0    | Deleterious |       |             |
| p.Ala19His | VUS               | 0.00   | Neutral       | 0.92   | Pathogenic | -9.09  | Pathogenic | 0.70 | Disease | 1.00 | Probably damaging | 0    | Deleterious |       |             |
| p.Ala19Gln | VUS               | 0.00   | Neutral       | 0.84   | Pathogenic | -8.78  | Pathogenic | 0.70 | Disease | 1.00 | Probably damaging | 0    | Deleterious |       |             |
| p.Ala19Pro | VUS               | -53.15 | Deleterious   | 0.94   | Pathogenic | -9.95  | Pathogenic | 0.81 | Disease | 1.00 | Probably damaging | 0    | Deleterious | 25.00 | Deleterious |
| p.Ala19Leu | VUS               | 0.00   | Neutral       | 0.71   | Pathogenic | -6.76  | Benign     | 0.70 | Disease | 1.00 | Probably damaging | 0    | Deleterious |       |             |
| p.Ala19Asp | VUS               | -2.14  | Neutral       | 0.94   | Pathogenic | -9.76  | Pathogenic | 0.71 | Disease | 0.99 | Probably damaging | 0    | Deleterious | 24.40 | Deleterious |
| p.Ala19Glu | VUS               | 0.00   | Neutral       | 0.84   | Pathogenic | -7.55  | Pathogenic | 0.75 | Disease | 1.00 | Probably damaging | 0    | Deleterious |       |             |
| p.Ala19Gly | VUS               | 0.00   | Neutral       | 0.43   | Ambiguous  | -8.65  | Pathogenic | 0.44 | Neutral | 1.00 | Probably damaging | 0    | Deleterious | 24.30 | Deleterious |
| p.Ala19Val | VUS               | 0.00   | Neutral       | 0.65   | Pathogenic | -7.64  | Pathogenic | 0.42 | Neutral | 1.00 | Probably damaging | 0    | Deleterious | 24.40 | Deleterious |
| p.Ala19Tyr | VUS               | 0.00   | Neutral       | 0.94   | Pathogenic | -10.25 | Pathogenic | 0.70 | Disease | 1.00 | Probably damaging | 0    | Deleterious |       |             |
| p.Ala19Cys | VUS               | -1.56  | Neutral       | 0.76   | Pathogenic | -8.25  | Pathogenic | 0.65 | Disease | 1.00 | Probably damaging | 0    | Deleterious |       |             |
| p.Ala19Trp | VUS               | 0.00   | Neutral       | 0.98   | Pathogenic | -10.40 | Pathogenic | 0.69 | Disease | 1.00 | Probably damaging | 0    | Deleterious |       |             |
| p.Ala19Phe | VUS               | 0.00   | Neutral       | 0.93   | Pathogenic | -9.57  | Pathogenic | 0.71 | Disease | 1.00 | Probably damaging | 0    | Deleterious |       |             |
| p.Ala20Asn | VUS               | -53.15 | Deleterious   | 0.99   | Pathogenic | -20.00 | Pathogenic | 0.64 | Disease | 0.96 | Probably damaging | 0.02 | Deleterious |       |             |
| p.Ala20Lys | VUS               | -53.15 | Deleterious   | 0.99   | Pathogenic | -21.46 | Pathogenic | 0.68 | Disease | 1.00 | Probably damaging | 0.02 | Deleterious |       |             |
| p.Ala20Thr | VUS               | -21.91 | Indeterminate | 0.50   | Ambiguous  | -8.44  | Pathogenic | 0.62 | Disease | 1.00 | Probably damaging | 0.21 | Tolerated   | 22.50 | Deleterious |
| p.Ala20Arg | VUS               | -53.15 | Deleterious   | 0.97   | Pathogenic | -18.12 | Pathogenic | 0.69 | Disease | 1.00 | Probably damaging | 0.06 | Tolerated   |       |             |
| p.Ala20Ser | VUS               | -24.89 | Indeterminate | 0.31   | Benign     | -7.00  | Benign     | 0.37 | Neutral | 0.20 | Benign            | 0.26 | Tolerated   | 14.86 | Neutral     |
| p.Ala20Ile | VUS               | -53.15 | Deleterious   | 0.86   | Pathogenic | -14.21 | Pathogenic | 0.69 | Disease | 1.00 | Probably damaging | 0.01 | Deleterious |       |             |
| p.Ala20Met | VUS               | -53.15 | Deleterious   | 0.92   | Pathogenic | -17.29 | Pathogenic | 0.64 | Disease | 1.00 | Probably damaging | 0.01 | Deleterious |       |             |
| p.Ala20His | VUS               | -53.15 | Deleterious   | 0.99   | Pathogenic | -21.47 | Pathogenic | 0.68 | Disease | 1.00 | Probably damaging | 0    | Deleterious |       |             |
| p.Ala20Gln | VUS               | -53.15 | Deleterious   | 0.96   | Pathogenic | -19.57 | Pathogenic | 0.68 | Disease | 1.00 | Probably damaging | 0.01 | Deleterious |       |             |
| p.Ala20Pro | VUS               | -53.15 | Deleterious   | 0.95   | Pathogenic | -15.03 | Pathogenic | 0.77 | Disease | 1.00 | Probably damaging | 0.02 | Deleterious | 22.70 | Deleterious |
| p.Ala20Leu | VUS               | -53.15 | Deleterious   | 0.81   | Pathogenic | -16.05 | Pathogenic | 0.68 | Disease | 0.99 | Probably damaging | 0.01 | Deleterious |       |             |
| p.Ala20Asp | VUS               | -53.15 | Deleterious   | 0.99   | Pathogenic | -19.89 | Pathogenic | 0.73 | Disease | 1.00 | Probably damaging | 0.01 | Deleterious |       |             |
| p.Ala20Glu | VUS               | -53.15 | Deleterious   | 0.98   | Pathogenic | -18.55 | Pathogenic | 0.72 | Disease | 1.00 | Probably damaging | 0.01 | Deleterious | 22.90 | Deleterious |
| p.Ala20Gly | VUS               | -53.15 | Deleterious   | 0.54   | Ambiguous  | -11.28 | Pathogenic | 0.55 | Disease | 0.99 | Probably damaging | 0.03 | Deleterious | 22.90 | Deleterious |
| p.Ala20Val | VUS               | -9.53  | Indeterminate | 0.50   | Ambiguous  | -9.61  | Pathogenic | 0.62 | Disease | 0.85 | Possibly damaging | 0.02 | Deleterious | 20.60 | Deleterious |
| p.Ala20Tyr | VUS               | -53.15 | Deleterious   | 0.99   | Pathogenic | -19.34 | Pathogenic | 0.68 | Disease | 1.00 | Probably damaging | 0    | Deleterious |       |             |
| p.Ala20Cys | VUS               | -5.52  | Neutral       | 0.74   | Pathogenic | -8.55  | Pathogenic | 0.59 | Disease | 1.00 | Probably damaging | 0.01 | Deleterious |       |             |
| p.Ala20Trp | VUS               | -53.15 | Deleterious   | 1.00   | Pathogenic | -18.45 | Pathogenic | 0.69 | Disease | 1.00 | Probably damaging | 0    | Deleterious |       |             |
| p.Ala20Phe | VUS               | -53.15 | Deleterious   | 0.98   | Pathogenic | -19.05 | Pathogenic | 0.69 | Disease | 1.00 | Probably damaging | 0    | Deleterious |       |             |
| p.Ala21Asn | VUS               | -53.15 | Deleterious   | 0.8048 | Pathogenic | -13.28 | Pathogenic | 0.63 | Disease | 0.99 | Probably damaging | 0.02 | Deleterious |       |             |
| p.Ala21Lys | VUS               | -53.15 | Deleterious   | 0.8769 | Pathogenic | -13.50 | Pathogenic | 0.64 | Disease | 1.00 | Probably damaging | 0.03 | Deleterious |       |             |
| p.Ala21Thr | VUS               | -9.18  | Indeterminate | 0.4417 | Ambiguous  | -9.89  | Pathogenic | 0.53 | Disease | 1.00 | Probably damaging | 0.06 | Tolerated   | 23.30 | Deleterious |
| p.Ala21Arg | VUS               | -53.15 | Deleterious   | 0.6339 | Pathogenic | -11.05 | Pathogenic | 0.61 | Disease | 1.00 | Probably damaging | 0.02 | Deleterious |       |             |
| p.Ala21Ser | VUS               | -2.09  | Neutral       | 0.1823 | Benign     | -6.29  | Benign     | 0.52 | Disease | 0.52 | Possibly damaging | 0.22 | Tolerated   | 21.10 | Deleterious |
| p.Ala21Ile | VUS               | -53.15 | Deleterious   | 0.74   | Pathogenic | -13.32 | Pathogenic | 0.64 | Disease | 1.00 | Probably damaging | 0.03 | Deleterious |       |             |
| p.Ala21Met | VUS               | -53.15 | Deleterious   | 0.6696 | Pathogenic | -11.97 | Pathogenic | 0.63 | Disease | 1.00 | Probably damaging | 0.02 | Deleterious |       |             |
| p.Ala21His | VUS               | -53.15 | Deleterious   | 0.80   | Pathogenic | -13.25 | Pathogenic | 0.63 | Disease | 1.00 | Probably damaging | 0.01 | Deleterious |       |             |
| p.Ala21Gln | VUS               | -53.15 | Deleterious   | 0.5501 | Ambiguous  | -11.63 | Pathogenic | 0.62 | Disease | 1.00 | Probably damaging | 0.02 | Deleterious |       |             |
| p.Ala21Pro | VUS               | -53.15 | Deleterious   | 0.9341 | Pathogenic | -14.22 | Pathogenic | 0.67 | Disease | 1.00 | Probably damaging | 0.06 | Tolerated   | 23.50 | Deleterious |
| p.Ala21Leu | VUS               | -5.31  | Neutral       | 0.5239 | Ambiguous  | -11.90 | Pathogenic | 0.63 | Disease | 1.00 | Probably damaging | 0.18 | Tolerated   |       |             |
| p.Ala21Asp | VUS               | -53.15 | Deleterious   | 0.91   | Pathogenic | -11.71 | Pathogenic | 0.74 | Disease | 1.00 | Probably damaging | 0.02 | Deleterious | 25.20 | Deleterious |
| p.Ala21Glu | VUS               | -53.15 | Deleterious   | 0.71   | Pathogenic | -9.30  | Pathogenic | 0.67 | Disease | 1.00 | Probably damaging | 0.03 | Deleterious |       |             |
| p.Ala21Gly | VUS               | -0.52  | Neutral       | 0.25   | Benign     | -0.84  | Benign     | 0.51 | Disease | 0.99 | Probably damaging | 0.13 | Tolerated   | 24.60 | Deleterious |
| p.Ala21Val | VUS               | -1.47  | Neutral       | 0.4395 | Ambiguous  | -10.01 | Pathogenic | 0.46 | Neutral | 1.00 | Probably damaging | 0.06 | Tolerated   | 25.00 | Deleterious |
| p.Ala21Tyr | VUS               | -53.15 | Deleterious   | 0.7762 | Pathogenic | -11.79 | Pathogenic | 0.66 | Disease | 1.00 | Probably damaging | 0.01 | Deleterious |       |             |
| p.Ala21Cys | VUS               | -0.74  | Neutral       | 0.63   | Pathogenic | -8.76  | Pathogenic | 0.59 | Disease | 1.00 | Probably damaging | 0.03 | Deleterious |       |             |
| p.Ala21Trp | VUS               | -53.15 | Deleterious   | 0.8406 | Pathogenic | -11.16 | Pathogenic | 0.67 | Disease | 1.00 | Probably damaging | 0    | Deleterious |       |             |
| p.Ala21Phe | VUS               | -53.15 | Deleterious   | 0.70   | Pathogenic | -12.11 | Pathogenic | 0.67 | Disease | 1.00 | Probably damaging | 0.01 | Deleterious |       |             |
| p.Arg22Asn | VUS               | 0.00   | Neutral       | 0.5974 | Pathogenic | -6.51  | Benign     | 0.44 | Neutral | 0.99 | Probably damaging | 0.07 | Tolerated   |       |             |
| p.Arg22Lys | VUS               | -1.44  | Neutral       | 0.2087 | Benign     | -6.50  | Benign     | 0.16 | Neutral | 0.28 | Benign            | 0.25 | Tolerated   |       |             |
| p.Arg22Thr | VUS               | -27.66 | Indeterminate | 0.3244 | Benign     | -7.75  | Pathogenic | 0.28 | Neutral | 0.77 | Possibly damaging | 0.09 | Tolerated   |       |             |
| p.Arg22Ser | VUS               | -23.87 | Indeterminate | 0.4527 | Ambiguous  | -6.49  | Benign     | 0.36 | Neutral | 0.99 | Probably damaging | 0.23 | Tolerated   |       |             |
| p.Arg22Ile | VUS               | -0.98  | Neutral       | 0.4942 | Ambiguous  | -11.18 | Pathogenic | 0.45 | Neutral | 1.00 | Probably damaging | 0.03 | Deleterious |       |             |
| p.Arg22Met | VUS               | -8.42  | Indeterminate | 0.4456 | Ambiguous  | -9.14  | Pathogenic | 0.47 | Neutral | 0.98 | Probably damaging | 0.02 | Deleterious |       |             |
| p.Arg22His | VUS               | 0.00   | Neutral       | 0.16   | Benign     | -4.40  | Benign     | 0.32 | Neutral | 0.99 | Probably damaging | 0.04 | Deleterious |       |             |
| p.Arg22Gln | VUS               | 0.00   | Neutral       | 0.1157 | Benign     | -5.42  | Benign     | 0.16 | Neutral | 0.78 | Possibly damaging | 0.15 | Tolerated   | 12.71 | Neutral     |
| p.Arg22Pro | VUS               | -53.15 | Deleterious   | 0.8905 | Pathogenic | -11.55 | Pathogenic | 0.54 | Disease | 1.00 | Probably damaging | 0.05 | Deleterious | 20.40 | Deleterious |
| p.Arg22Leu | VUS               | -0.02  | Neutral       | 0.2206 | Benign     | -6.54  | Benign     | 0.22 | Neutral | 0.51 | Possibly damaging | 0.1  | Tolerated   | 12.51 | Neutral     |
| p.Arg22Asp | VUS               | -6.69  | Indeterminate | 0.6151 | Pathogenic | -6.66  | Benign     | 0.47 | Neutral | 1.00 | Probably damaging | 0.05 | Deleterious |       |             |
| p.Arg22Glu | VUS               | 0.00   | Neutral       | 0.2995 | Benign     | -6.72  | Benign     | 0.37 | Neutral | 0.84 | Possibly damaging | 0.11 | Tolerated   |       |             |
| p.Arg22Ala | VUS               | -0.01  | Neutral       | 0.2965 | Benign     | -5.51  | Benign     | 0.41 | Neutral | 0.95 | Possibly damaging | 0.22 | Tolerated   |       |             |
| p.Arg22Gly | VUS               | -53.15 | Deleterious   | 0.2016 | Benign     | -6.85  | Benign     | 0.25 | Neutral | 0.47 | Possibly damaging | 0.06 | Tolerated   | 16.11 | Deleterious |
| p.Arg22Val | VUS               | -0.16  | Neutral       | 0.4546 | Ambiguous  | -8.96  | Pathogenic | 0.45 | Neutral | 0.99 | Probably damaging | 0.05 | Deleterious |       |             |
| p.Arg22Tyr | VUS               | -3.79  | Neutral       | 0.4817 | Ambiguous  | -6.03  | Benign     | 0.41 | Neutral | 0.94 | Possibly damaging | 0.03 | Deleterious |       |             |
| p.Arg22Cys | VUS               | 0.00   | Neutral       | 0.2916 | Benign     | -6.74  | Benign     | 0.27 | Neutral | 1.00 | Probably damaging | 0.01 | Deleterious |       |             |
| p.Arg22Trp | VUS               | -9.64  | Indeterminate | 0.2423 | Benign     | -8.27  | Pathogenic | 0.53 | Disease | 1.00 | Probably damaging | 0.01 | Deleterious | 23.50 | Deleterious |
| p.Arg22Phe | VUS               | -32.64 | Indeterminate | 0.5572 | Ambiguous  | -7.96  | Pathogenic | 0.45 | Neutral | 0.89 | Possibly damaging | 0.02 | Deleterious |       |             |
| p.Gly23Asn | VUS               | -21.58 | Indeterminate | 0.88   | Pathogenic | -9.28  | Pathogenic | 0.66 | Disease | 1.00 | Probably damaging | 0.21 | Tolerated   |       |             |
| p.Gly23Lys | VUS               | -53.15 | Deleterious   | 0.9761 | Pathogenic | -13.72 | Pathogenic | 0.70 | Disease | 1.00 | Probably damaging | 0.01 | Deleterious |       |             |
| p.Gly23Thr | VUS               | -53.15 | Deleterious   | 0.9417 | Pathogenic | -11.02 | Pathogenic | 0.64 | Disease | 1.00 | Probably damaging | 0.01 | Deleterious |       |             |
| p.Gly23Arg | Likely pathogenic | -53.15 | Deleterious   | 0.9175 | Pathogenic | -11.14 | Pathogenic | 0.49 | Neutral | 1.00 | Probably damaging | 0.01 | Deleterious | 27.20 | Deleterious |
| p.Gly23Ser | Likely pathogenic | -53.15 | Deleterious   | 0.6877 | Pathogenic | -8.75  | Pathogenic | 0.67 | Disease | 0.99 | Probably damaging | 0.03 | Deleterious | 26.90 | Deleterious |
| p.Gly23Ile | VUS               | -53.15 | Deleterious   | 0.9805 | Pathogenic | -13.32 | Pathogenic | 0.71 | Disease | 1.00 | Probably damaging | 0    | Deleterious |       |             |
| p.Gly23Met | VUS               | -53.15 | Deleterious   | 0.9793 | Pathogenic | -13.18 | Pathogenic | 0.71 | Disease | 1.00 | Probably damaging |      |             |       |             |

|            |            |        |               |        |            |        |            |      |         |      |                   |       |             |       |             |
|------------|------------|--------|---------------|--------|------------|--------|------------|------|---------|------|-------------------|-------|-------------|-------|-------------|
| p.Arg24Ser | VUS        | -0.21  | Neutral       | 0.4235 | Ambiguous  | -3.88  | Benign     | 0.38 | Neutral | 1.00 | Probably damaging | 0.49  | Tolerated   |       |             |
| p.Arg24Ile | VUS        | -0.34  | Neutral       | 0.6604 | Pathogenic | -9.38  | Pathogenic | 0.48 | Neutral | 1.00 | Probably damaging | 0.19  | Tolerated   |       |             |
| p.Arg24Met | VUS        | -0.60  | Neutral       | 0.5378 | Ambiguous  | -8.07  | Pathogenic | 0.46 | Neutral | 0.68 | Possibly damaging | 0.11  | Tolerated   |       |             |
| p.Arg24His | VUS        | -0.01  | Neutral       | 0.1286 | Benign     | -5.36  | Benign     | 0.11 | Neutral | 0.99 | Probably damaging | 0.27  | Tolerated   |       |             |
| p.Arg24Gln | VUS        | -16.21 | Indeterminate | 0.12   | Benign     | -4.47  | Benign     | 0.08 | Neutral | 0.73 | Possibly damaging | 0.61  | Tolerated   | 18.45 | Deleterious |
| p.Arg24Pro | Pathogenic | -53.15 | Deleterious   | 0.9136 | Pathogenic | -8.08  | Pathogenic | 0.63 | Disease | 1.00 | Probably damaging | 0.24  | Tolerated   | 22.80 | Deleterious |
| p.Arg24Leu | VUS        | -1.07  | Neutral       | 0.2995 | Benign     | -5.72  | Benign     | 0.10 | Neutral | 1.00 | Probably damaging | 0.35  | Tolerated   | 19.08 | Deleterious |
| p.Arg24Asp | VUS        | 0.00   | Neutral       | 0.4363 | Ambiguous  | -1.34  | Benign     | 0.19 | Neutral | 0.79 | Possibly damaging | 0.64  | Tolerated   |       |             |
| p.Arg24Glu | VUS        | -1.01  | Neutral       | 0.3064 | Benign     | -2.84  | Benign     | 0.20 | Neutral | 0.80 | Possibly damaging | 0.8   | Tolerated   |       |             |
| p.Arg24Ala | VUS        | -0.03  | Neutral       | 0.3784 | Ambiguous  | -3.76  | Benign     | 0.39 | Neutral | 0.99 | Probably damaging | 0.53  | Tolerated   |       |             |
| p.Arg24Gly | VUS        | -2.96  | Neutral       | 0.2927 | Benign     | -5.24  | Benign     | 0.14 | Neutral | 1.00 | Probably damaging | 0.33  | Tolerated   | 23.00 | Deleterious |
| p.Arg24Val | VUS        | -0.12  | Neutral       | 0.5914 | Pathogenic | -6.67  | Benign     | 0.48 | Neutral | 1.00 | Probably damaging | 0.26  | Tolerated   |       |             |
| p.Arg24Tyr | VUS        | -1.12  | Neutral       | 0.5087 | Ambiguous  | -8.91  | Pathogenic | 0.38 | Neutral | 0.76 | Possibly damaging | 0.24  | Tolerated   |       |             |
| p.Arg24Cys | VUS        | -0.09  | Neutral       | 0.2899 | Benign     | -5.58  | Benign     | 0.17 | Neutral | 1.00 | Probably damaging | 0.07  | Tolerated   |       |             |
| p.Arg24Trp | VUS        | -0.43  | Neutral       | 0.2888 | Benign     | -8.64  | Pathogenic | 0.19 | Neutral | 0.32 | Benign            | 0.06  | Tolerated   | 22.70 | Deleterious |
| p.Arg24Phe | VUS        | -0.09  | Neutral       | 0.6672 | Pathogenic | -9.23  | Pathogenic | 0.46 | Neutral | 0.76 | Possibly damaging | 0.17  | Tolerated   |       |             |
| p.Val25Asn | VUS        | -4.24  | Neutral       | 0.4525 | Ambiguous  | -10.67 | Pathogenic | 0.30 | Neutral | 0.84 | Possibly damaging | 0.02  | Deleterious |       |             |
| p.Val25Lys | VUS        | -17.81 | Indeterminate | 0.4628 | Ambiguous  | -10.72 | Pathogenic | 0.29 | Neutral | 0.12 | Benign            | 0.03  | Deleterious |       |             |
| p.Val25Thr | VUS        | -1.42  | Neutral       | 0.1379 | Benign     | -5.74  | Benign     | 0.10 | Neutral | 0.04 | Benign            | 0.32  | Tolerated   |       |             |
| p.Val25Arg | VUS        | -3.28  | Neutral       | 0.3039 | Benign     | -8.25  | Pathogenic | 0.18 | Neutral | 0.38 | Benign            | 0.02  | Deleterious |       |             |
| p.Val25Ser | VUS        | -0.43  | Neutral       | 0.2142 | Benign     | -7.24  | Benign     | 0.27 | Neutral | 0.80 | Possibly damaging | 0.03  | Deleterious |       |             |
| p.Val25Ile | VUS        | -0.50  | Neutral       | 0.1369 | Benign     | -7.02  | Benign     | 0.13 | Neutral | 0.01 | Benign            | 0.39  | Tolerated   | 14.12 | Neutral     |
| p.Val25Met | VUS        | -21.03 | Indeterminate | 0.3185 | Benign     | -7.60  | Pathogenic | 0.16 | Neutral | 0.60 | Possibly damaging | 0.05  | Deleterious |       |             |
| p.Val25His | VUS        | -0.26  | Neutral       | 0.4947 | Ambiguous  | -7.06  | Benign     | 0.20 | Neutral | 0.90 | Possibly damaging | 0.01  | Deleterious |       |             |
| p.Val25Gln | VUS        | -0.52  | Neutral       | 0.3048 | Benign     | -8.28  | Pathogenic | 0.27 | Neutral | 0.41 | Benign            | 0.03  | Deleterious |       |             |
| p.Val25Pro | VUS        | 0.00   | Neutral       | 0.2132 | Benign     | -6.08  | Benign     | 0.29 | Neutral | 0.84 | Possibly damaging | 0.04  | Deleterious |       |             |
| p.Val25Leu | VUS        | -0.06  | Neutral       | 0.2415 | Benign     | -3.55  | Benign     | 0.12 | Neutral | 0.00 | Benign            | 0.33  | Tolerated   | 12.09 | Neutral     |
| p.Val25Asp | VUS        | -17.55 | Indeterminate | 0.2921 | Benign     | -6.73  | Benign     | 0.33 | Neutral | 0.96 | Probably damaging | 0.01  | Deleterious |       |             |
| p.Val25Glu | VUS        | -0.18  | Neutral       | 0.1475 | Benign     | -3.45  | Benign     | 0.16 | Neutral | 0.03 | Benign            | 0.08  | Tolerated   | 4.46  | Neutral     |
| p.Val25Ala | VUS        | -53.15 | Deleterious   | 0.10   | Benign     | -4.13  | Benign     | 0.06 | Neutral | 0.01 | Benign            | 0.38  | Tolerated   | 0.34  | Neutral     |
| p.Val25Gly | VUS        | -19.94 | Indeterminate | 0.1571 | Benign     | -7.74  | Pathogenic | 0.15 | Neutral | 0.91 | Possibly damaging | 0     | Deleterious | 5.28  | Neutral     |
| p.Val25Tyr | VUS        | -33.22 | Indeterminate | 0.5066 | Ambiguous  | -6.86  | Benign     | 0.27 | Neutral | 0.81 | Possibly damaging | 0.01  | Deleterious |       |             |
| p.Val25Cys | VUS        | 0.00   | Neutral       | 0.6914 | Pathogenic | -6.54  | Benign     | 0.19 | Neutral | 0.93 | Possibly damaging | 0.04  | Deleterious |       |             |
| p.Val25Trp | VUS        | -2.22  | Neutral       | 0.6234 | Pathogenic | -7.79  | Pathogenic | 0.29 | Neutral | 0.99 | Probably damaging | 0     | Deleterious |       |             |
| p.Val25Phe | VUS        | -3.13  | Neutral       | 0.2408 | Benign     | -7.96  | Pathogenic | 0.25 | Neutral | 0.68 | Possibly damaging | 0.03  | Deleterious |       |             |
| p.Glu26Asn | VUS        | -1.41  | Neutral       | 0.3554 | Ambiguous  | -8.72  | Pathogenic | 0.27 | Neutral | 0.05 | Benign            | 0.02  | Deleterious |       |             |
| p.Glu26Lys | VUS        | -0.44  | Neutral       | 0.3023 | Benign     | -7.86  | Pathogenic | 0.19 | Neutral | 0.01 | Benign            | 0.04  | Deleterious | 14.84 | Neutral     |
| p.Glu26Thr | VUS        | -9.37  | Indeterminate | 0.2484 | Benign     | -6.86  | Benign     | 0.29 | Neutral | 0.13 | Benign            | 0.01  | Deleterious |       |             |
| p.Glu26Arg | VUS        | -0.10  | Neutral       | 0.2163 | Benign     | -5.10  | Benign     | 0.23 | Neutral | 0.00 | Benign            | 0.02  | Deleterious |       |             |
| p.Glu26Ser | VUS        | -27.38 | Indeterminate | 0.2275 | Benign     | -5.96  | Benign     | 0.31 | Neutral | 0.01 | Benign            | 0.02  | Deleterious |       |             |
| p.Glu26Ile | VUS        | -0.52  | Neutral       | 0.5949 | Pathogenic | -10.16 | Pathogenic | 0.33 | Neutral | 0.11 | Benign            | 0     | Deleterious |       |             |
| p.Glu26Met | VUS        | -0.27  | Neutral       | 0.6984 | Pathogenic | -9.89  | Pathogenic | 0.34 | Neutral | 0.02 | Benign            | 0     | Deleterious |       |             |
| p.Glu26His | VUS        | -4.15  | Neutral       | 0.3936 | Ambiguous  | -6.68  | Benign     | 0.22 | Neutral | 0.00 | Benign            | 0.21  | Tolerated   |       |             |
| p.Glu26Gln | VUS        | -2.58  | Neutral       | 0.1534 | Benign     | -5.86  | Benign     | 0.11 | Neutral | 0.00 | Benign            | 0.18  | Tolerated   | 11.94 | Neutral     |
| p.Glu26Pro | VUS        | -0.39  | Neutral       | 0.3451 | Ambiguous  | -5.81  | Benign     | 0.37 | Neutral | 0.21 | Benign            | 0.02  | Deleterious |       |             |
| p.Glu26Leu | VUS        | -0.53  | Neutral       | 0.4372 | Ambiguous  | -6.92  | Benign     | 0.34 | Neutral | 0.02 | Benign            | 0.01  | Deleterious |       |             |
| p.Glu26Asp | VUS        | -3.00  | Neutral       | 0.1188 | Benign     | -3.77  | Benign     | 0.11 | Neutral | 0.00 | Benign            | 0.08  | Tolerated   | 8.36  | Neutral     |
| p.Glu26Ala | VUS        | -1.96  | Neutral       | 0.1106 | Benign     | -4.01  | Benign     | 0.12 | Neutral | 0.00 | Benign            | 0.03  | Deleterious | 14.91 | Neutral     |
| p.Glu26Gly | VUS        | -4.39  | Neutral       | 0.1345 | Benign     | -5.02  | Benign     | 0.21 | Neutral | 0.23 | Benign            | 0.01  | Deleterious | 19.55 | Deleterious |
| p.Glu26Val | VUS        | -0.20  | Neutral       | 0.3096 | Benign     | -6.90  | Benign     | 0.28 | Neutral | 0.01 | Benign            | 0.01  | Deleterious | 17.11 | Deleterious |
| p.Glu26Tyr | VUS        | -5.42  | Neutral       | 0.7028 | Pathogenic | -9.93  | Pathogenic | 0.32 | Neutral | 0.26 | Benign            | 0     | Deleterious |       |             |
| p.Glu26Cys | VUS        | -0.02  | Neutral       | 0.8412 | Pathogenic | -8.04  | Pathogenic | 0.33 | Neutral | 1.00 | Probably damaging | 0     | Deleterious |       |             |
| p.Glu26Trp | VUS        | -0.96  | Neutral       | 0.8423 | Pathogenic | -8.77  | Pathogenic | 0.37 | Neutral | 0.89 | Possibly damaging | 0     | Deleterious |       |             |
| p.Glu26Phe | VUS        | -3.59  | Neutral       | 0.8086 | Pathogenic | -10.05 | Pathogenic | 0.33 | Neutral | 0.21 | Benign            | 0     | Deleterious |       |             |
| p.Glu27Asn | VUS        | -15.33 | Indeterminate | 0.8108 | Pathogenic | -8.82  | Pathogenic | 0.37 | Neutral | 0.97 | Probably damaging | 0.38  | Tolerated   |       |             |
| p.Glu27Lys | VUS        | -0.27  | Neutral       | 0.6297 | Pathogenic | -7.32  | Benign     | 0.18 | Neutral | 0.66 | Possibly damaging | 0.74  | Tolerated   | 22.50 | Deleterious |
| p.Glu27Thr | VUS        | -27.81 | Indeterminate | 0.582  | Pathogenic | -5.89  | Benign     | 0.29 | Neutral | 0.25 | Benign            | 0.47  | Tolerated   |       |             |
| p.Glu27Arg | VUS        | -6.08  | Indeterminate | 0.5915 | Pathogenic | -4.60  | Benign     | 0.24 | Neutral | 0.90 | Possibly damaging | 0.4   | Tolerated   |       |             |
| p.Glu27Ser | VUS        | -4.04  | Neutral       | 0.6781 | Pathogenic | -6.61  | Benign     | 0.42 | Neutral | 0.91 | Possibly damaging | 0.56  | Tolerated   |       |             |
| p.Glu27Ile | VUS        | -2.89  | Neutral       | 0.7775 | Pathogenic | -8.88  | Pathogenic | 0.44 | Neutral | 0.68 | Possibly damaging | 0.14  | Tolerated   |       |             |
| p.Glu27Met | VUS        | -2.28  | Neutral       | 0.8549 | Pathogenic | -8.51  | Pathogenic | 0.35 | Neutral | 0.74 | Possibly damaging | 0.13  | Tolerated   |       |             |
| p.Glu27His | VUS        | -4.17  | Neutral       | 0.7579 | Pathogenic | -6.22  | Benign     | 0.40 | Neutral | 0.99 | Probably damaging | 0.1   | Tolerated   |       |             |
| p.Glu27Gln | VUS        | -3.17  | Neutral       | 0.3021 | Benign     | -4.07  | Benign     | 0.13 | Neutral | 0.11 | Benign            | 0.53  | Tolerated   | 21.00 | Deleterious |
| p.Glu27Pro | VUS        | -7.45  | Indeterminate | 0.9    | Pathogenic | -6.85  | Benign     | 0.47 | Neutral | 0.95 | Possibly damaging | 0.21  | Tolerated   |       |             |
| p.Glu27Leu | VUS        | -2.14  | Neutral       | 0.777  | Pathogenic | -4.75  | Benign     | 0.31 | Neutral | 0.01 | Benign            | 0.23  | Tolerated   |       |             |
| p.Glu27Asp | VUS        | -25.59 | Indeterminate | 0.3212 | Benign     | -4.41  | Benign     | 0.12 | Neutral | 0.01 | Benign            | 0.51  | Tolerated   | 21.80 | Deleterious |
| p.Glu27Ala | VUS        | -3.09  | Neutral       | 0.2891 | Benign     | -3.86  | Benign     | 0.21 | Neutral | 0.07 | Benign            | 0.06  | Tolerated   | 21.30 | Deleterious |
| p.Glu27Gly | VUS        | -17.81 | Indeterminate | 0.6044 | Pathogenic | -6.56  | Benign     | 0.24 | Neutral | 0.98 | Probably damaging | 0.29  | Tolerated   | 23.10 | Deleterious |
| p.Glu27Val | VUS        | -0.71  | Neutral       | 0.5387 | Ambiguous  | -5.68  | Benign     | 0.43 | Neutral | 0.02 | Benign            | 0.3   | Tolerated   | 22.20 | Deleterious |
| p.Glu27Tyr | VUS        | -53.15 | Deleterious   | 0.9134 | Pathogenic | -10.09 | Pathogenic | 0.45 | Neutral | 0.98 | Probably damaging | 0.03  | Deleterious |       |             |
| p.Glu27Cys | VUS        | -18.51 | Indeterminate | 0.9673 | Pathogenic | -8.40  | Pathogenic | 0.44 | Neutral | 1.00 | Probably damaging | 0.04  | Deleterious |       |             |
| p.Glu27Trp | VUS        | -0.31  | Neutral       | 0.9791 | Pathogenic | -9.54  | Pathogenic | 0.49 | Neutral | 1.00 | Probably damaging | 0.01  | Deleterious |       |             |
| p.Glu27Phe | VUS        | -0.20  | Neutral       | 0.9594 | Pathogenic | -10.44 | Pathogenic | 0.45 | Neutral | 0.90 | Possibly damaging | -0.04 | Deleterious |       |             |
| p.Val28Asn | VUS        | -53.15 | Deleterious   | 0.9413 | Pathogenic | -17.77 | Pathogenic | 0.75 | Disease | 1.00 | Probably damaging | 0     | Deleterious |       |             |
| p.Val28Lys | VUS        | -53.15 | Deleterious   | 0.9711 | Pathogenic | -19.40 | Pathogenic | 0.78 | Disease | 1.00 | Probably damaging | 0     | Deleterious |       |             |
| p.Val28Thr | VUS        | -0.16  | Neutral       | 0.5482 | Ambiguous  | -7.25  | Benign     | 0.66 | Disease | 1.00 | Probably damaging | 0.01  | Deleterious |       |             |
| p.Val28Arg | VUS        | -53.15 | Deleterious   | 0.9327 | Pathogenic | -15.40 | Pathogenic | 0.76 | Disease | 1.00 | Probably damaging | 0     | Deleterious |       |             |
| p.Val28Ser | VUS        | -1.43  | Neutral       | 0.8134 | Pathogenic | -10.22 | Pathogenic | 0.70 | Disease | 1.00 | Probably damaging | 0     | Deleterious |       |             |
| p.Val28Ile | VUS        | -0.17  | Neutral       | 0.2771 | Benign     | -8.20  | Pathogenic | 0.44 | Neutral | 1.00 | Probably damaging | 0.05  | Deleterious |       |             |
| p.Val28Met | VUS        | -0.29  | Neutral       | 0.7568 | Pathogenic | -9.48  | Pathogenic | 0.62 | Disease | 1.00 | Probably damaging | 0.01  | Deleterious | 31.00 | Deleterious |
| p.Val28His | VUS        | -53.15 | Deleterious   | 0.9896 | Pathogenic | -16.15 | Pathogenic | 0.74 | Disease | 1.00 | Probably damaging | 0     | Deleterious |       |             |
| p.Val28Gln | VUS        | -53.15 | Deleterious   | 0.9319 | Pathogenic | -15.73 | Pathogenic | 0.76 | Disease | 1.00 | Probably damaging | 0     | Deleterious |       |             |
| p.Val28Pro | VUS        | -53.15 | Deleterious   | 0.9875 | Pathogenic | -12.89 | Pathogenic | 0.74 | Disease | 1.00 | Probably damaging | 0     | Deleterious |       |             |
| p.Val28Leu | VUS        | 0.00   | Neutral       | 0.7196 | Pathogenic | -7.49  | Benign     | 0.43 | Neutral | 1.00 | Probably damaging | 0.2   | Tolerated   | 25.95 | Deleterious |
| p.Val28Asp | VUS        | -53.15 | Deleterious   | 0.9632 | Pathogenic | -15.94 | Pathogenic | 0.81 | Disease | 1.00 | Probably damaging | 0     | Deleterious |       |             |
| p.Val28Glu | VUS        | -53.15 | Deleterious   | 0.9105 | Pathogenic | -14.49 | Pathogenic | 0.81 | Disease | 1.00 | Probably damaging | 0     | Deleterious | 32.00 | Deleterious |
| p.Val28Ala | VUS        | -0.04  | Neutral       | 0.4679 | Ambiguous  | -5.32  | Benign     | 0.56 | Disease | 1.00 | Probably damaging | 0.01  | Deleterious | 29.60 | Deleterious |
| p.Val28Gly | VUS        | -20.39 | Indeterminate | 0.57   | Pathogenic | -11.97 | Pathogenic | 0.76 | Disease | 1.00 | Probably damaging | 0     | Deleterious | 32.00 | Deleterious |
| p.Val28Tyr | VUS        | -53.15 | Deleterious   | 0.9801 | Pathogenic | -16.38 | Pathogenic | 0.75 | Disease | 1.00 | Probably damaging | 0     | Deleterious |       |             |
| p.Val28Cys | VUS        | -0.11  | Neutral       | 0.9384 | Pathogenic | -5.74  | Benign     | 0.68 | Disease | 1.00 | Probably damaging | 0     | Deleterious |       |             |
| p.Val28Trp | VUS        | -53.15 | Deleterious   | 0.9963 | Pathogenic | -15.93 | Pathogenic | 0.71 | Disease | 1.00 | Probably damaging | 0     | Deleterious |       |             |
| p.Val28Phe | VUS        | -53.15 | Deleterious   | 0.8948 | Pathogenic | -13.19 | Pathogenic | 0.77 | Disease | 1.00 | Probably damaging | 0.01  | Deleterious |       |             |
| p.Arg29Asn | VUS        | -4.64  | Neutral       | 0.7626 | Pathogenic | -10.66 | Pathogenic | 0.49 | Neutral | 0.98 | Probably damaging | 0.03  | Deleterious |       |             |
| p.Arg29Lys | VUS        | -0.17  | Neutral       | 0.191  | Benign     | -7.10  | Benign     | 0.20 | Neutral | 0.15 | Benign            | 0.3   | Tolerated   |       |             |
| p.Arg29Thr | VUS        | -12.09 | Indeterminate | 0.2316 | Benign     | -6.41  | Benign     | 0.35 | Neutral | 0.55 | Possibly damaging | 0.26  | Tolerated   |       |             |
| p.Arg29Ser | VUS        | -0.79  | Neutral       | 0.4961 | Ambiguous  | -5.40  | Benign     | 0.46 | Neutral | 0.99 | Probably damaging | 0.03  | Deleterious |       |             |
| p.Arg29Ile |            |        |               |        |            |        |            |      |         |      |                   |       |             |       |             |

|            |            |        |               |        |            |          |            |      |         |      |                   |      |             |       |             |
|------------|------------|--------|---------------|--------|------------|----------|------------|------|---------|------|-------------------|------|-------------|-------|-------------|
| p.Ala30Asn | VUS        | -53.15 | Deleterious   | 0.2215 | Benign     | -8.71    | Pathogenic | 0.35 | Neutral | 0.09 | Benign            | 0.41 | Tolerated   |       |             |
| p.Ala30Lys | VUS        | -1.25  | Neutral       | 0.2472 | Benign     | -6.24    | Benign     | 0.36 | Neutral | 0.60 | Possibly damaging | 0.5  | Tolerated   |       |             |
| p.Ala30Thr | VUS        | -23.96 | Indeterminate | 0.1066 | Benign     | -6.59    | Benign     | 0.24 | Neutral | 0.02 | Benign            | 0.51 | Tolerated   | 20.30 | Deleterious |
| p.Ala30Arg | VUS        | -3.40  | Neutral       | 0.1463 | Benign     | -3.24    | Benign     | 0.34 | Neutral | 0.84 | Possibly damaging | 0.47 | Tolerated   |       |             |
| p.Ala30Ser | VUS        | -11.06 | Indeterminate | 0.1102 | Benign     | -5.07    | Benign     | 0.26 | Neutral | 0.00 | Benign            | 0.56 | Tolerated   | 18.06 | Deleterious |
| p.Ala30Ile | VUS        | -10.02 | Indeterminate | 0.2831 | Benign     | -8.89    | Pathogenic | 0.47 | Neutral | 0.60 | Possibly damaging | 0.43 | Tolerated   |       |             |
| p.Ala30Met | VUS        | -5.52  | Neutral       | 0.2343 | Benign     | -8.27    | Pathogenic | 0.34 | Neutral | 0.38 | Benign            | 0.24 | Tolerated   |       |             |
| p.Ala30His | VUS        | -6.94  | Indeterminate | 0.2277 | Benign     | -7.13    | Benign     | 0.44 | Neutral | 0.96 | Possibly damaging | 0.56 | Tolerated   |       |             |
| p.Ala30Gln | VUS        | -11.53 | Indeterminate | 0.1304 | Benign     | -5.04    | Benign     | 0.30 | Neutral | 0.09 | Benign            | 0.42 | Tolerated   |       |             |
| p.Ala30Pro | VUS        | -53.15 | Deleterious   | 0.7136 | Pathogenic | -8.71    | Pathogenic | 0.53 | Disease | 0.81 | Possibly damaging | 0.26 | Tolerated   | 23.10 | Deleterious |
| p.Ala30Leu | VUS        | -9.74  | Indeterminate | 0.1437 | Benign     | -5.95    | Benign     | 0.29 | Neutral | 0.04 | Benign            | 0.71 | Tolerated   |       |             |
| p.Ala30Asp | VUS        | -33.22 | Indeterminate | 0.1445 | Benign     | -6.67    | Benign     | 0.33 | Neutral | 0.01 | Benign            | 0.34 | Tolerated   |       |             |
| p.Ala30Glu | VUS        | -2.24  | Neutral       | 0.0953 | Benign     | -4.64    | Benign     | 0.27 | Neutral | 0.01 | Benign            | 0.49 | Tolerated   | 14.41 | Neutral     |
| p.Ala30Gly | VUS        | -53.15 | Deleterious   | 0.1178 | Benign     | -5.15    | Benign     | 0.36 | Neutral | 0.01 | Benign            | 0.41 | Tolerated   | 17.42 | Deleterious |
| p.Ala30Val | VUS        | -7.22  | Indeterminate | 0.1334 | Benign     | -6.66    | Benign     | 0.35 | Neutral | 0.83 | Possibly damaging | 0.56 | Tolerated   | 17.56 | Deleterious |
| p.Ala30Tyr | VUS        | -25.61 | Indeterminate | 0.3408 | Ambiguous  | -9.70    | Pathogenic | 0.45 | Neutral | 0.99 | Probably damaging | 1    | Tolerated   |       |             |
| p.Ala30Cys | VUS        | -21.54 | Indeterminate | 0.4009 | Ambiguous  | -7.39    | Benign     | 0.42 | Neutral | 0.99 | Probably damaging | 0.19 | Tolerated   |       |             |
| p.Ala30Trp | VUS        | -14.31 | Indeterminate | 0.4175 | Ambiguous  | -8.02    | Pathogenic | 0.52 | Disease | 1.00 | Probably damaging | 0.19 | Tolerated   |       |             |
| p.Ala30Phe | VUS        | -9.80  | Indeterminate | 0.2629 | Benign     | -8.95    | Pathogenic | 0.46 | Neutral | 0.96 | Possibly damaging | 0.7  | Tolerated   |       |             |
| p.Leu31Asn | VUS        | -15.80 | Indeterminate | 0.8943 | Pathogenic | -12.27   | Pathogenic | 0.74 | Disease | 1.00 | Probably damaging | 0    | Deleterious |       |             |
| p.Leu31Lys | VUS        | -1.84  | Neutral       | 0.6424 | Pathogenic | -10.83   | Pathogenic | 0.76 | Disease | 1.00 | Probably damaging | 0    | Deleterious |       |             |
| p.Leu31Thr | VUS        | -7.23  | Indeterminate | 0.7298 | Pathogenic | -8.94    | Pathogenic | 0.72 | Disease | 1.00 | Probably damaging | 0    | Deleterious |       |             |
| p.Leu31Arg | VUS        | -3.31  | Neutral       | 0.3758 | Ambiguous  | -6.01    | Benign     | 0.84 | Disease | 1.00 | Probably damaging | 0    | Deleterious | 31.00 | Deleterious |
| p.Leu31Ser | VUS        | -12.36 | Indeterminate | 0.8197 | Pathogenic | -6.81    | Benign     | 0.82 | Disease | 1.00 | Probably damaging | 0    | Deleterious |       |             |
| p.Leu31Ile | VUS        | -1.36  | Neutral       | 0.3859 | Ambiguous  | -8.78    | Pathogenic | 0.53 | Disease | 1.00 | Probably damaging | 0.04 | Deleterious |       |             |
| p.Leu31Met | VUS        | -6.95  | Indeterminate | 0.3112 | Benign     | -6.60    | Benign     | 0.54 | Disease | 1.00 | Probably damaging | 0.02 | Deleterious | 28.90 | Deleterious |
| p.Leu31His | VUS        | -5.62  | Neutral       | 0.5671 | Pathogenic | -5.44    | Benign     | 0.82 | Disease | 1.00 | Probably damaging | 0    | Deleterious |       |             |
| p.Leu31Gln | VUS        | -18.98 | Indeterminate | 0.4554 | Ambiguous  | -6.92    | Benign     | 0.83 | Disease | 1.00 | Probably damaging | 0    | Deleterious | 30.00 | Deleterious |
| p.Leu31Pro | VUS        | -53.15 | Deleterious   | 0.9258 | Pathogenic | -12.46   | Pathogenic | 0.71 | Disease | 1.00 | Probably damaging | 0    | Deleterious | 31.00 | Deleterious |
| p.Leu31Asp | VUS        | -53.15 | Deleterious   | 0.9567 | Pathogenic | -11.70   | Pathogenic | 0.73 | Disease | 1.00 | Probably damaging | 0    | Deleterious |       |             |
| p.Leu31Glu | VUS        | -9.76  | Indeterminate | 0.7905 | Pathogenic | -7.46    | Benign     | 0.76 | Disease | 1.00 | Probably damaging | 0    | Deleterious |       |             |
| p.Leu31Ala | VUS        | -9.65  | Indeterminate | 0.447  | Ambiguous  | -2.53    | Benign     | 0.70 | Disease | 1.00 | Probably damaging | 0.01 | Deleterious |       |             |
| p.Leu31Gly | VUS        | -6.62  | Indeterminate | 0.7501 | Pathogenic | -8.20    | Pathogenic | 0.75 | Disease | 1.00 | Probably damaging | 0    | Deleterious |       |             |
| p.Leu31Val | VUS        | -21.43 | Indeterminate | 0.3177 | Benign     | -6.65    | Benign     | 0.44 | Neutral | 1.00 | Probably damaging | 0.02 | Deleterious | 28.50 | Deleterious |
| p.Leu31Tyr | VUS        | -21.21 | Indeterminate | 0.6131 | Pathogenic | -6.76    | Benign     | 0.71 | Disease | 1.00 | Probably damaging | 0.01 | Deleterious |       |             |
| p.Leu31Cys | VUS        | -33.20 | Indeterminate | 0.7024 | Pathogenic | -4.19    | Benign     | 0.66 | Disease | 1.00 | Probably damaging | 0    | Deleterious |       |             |
| p.Leu31Trp | VUS        | -18.55 | Indeterminate | 0.5192 | Ambiguous  | -6.83    | Benign     | 0.76 | Disease | 1.00 | Probably damaging | 0    | Deleterious |       |             |
| p.Leu31Phe | VUS        | -5.13  | Neutral       | 0.3289 | Benign     | -6.42    | Benign     | 0.54 | Disease | 1.00 | Probably damaging | 0.18 | Tolerated   |       |             |
| p.Leu32Asn | VUS        | -53.15 | Deleterious   | 0.9879 | Pathogenic | -19.16   | Pathogenic | 0.72 | Disease | 1.00 | Probably damaging | 0    | Deleterious |       |             |
| p.Leu32Lys | VUS        | -53.15 | Deleterious   | 0.9561 | Pathogenic | -18.46   | Pathogenic | 0.72 | Disease | 1.00 | Probably damaging | 0    | Deleterious |       |             |
| p.Leu32Thr | VUS        | -15.95 | Indeterminate | 0.8634 | Pathogenic | -14.45   | Pathogenic | 0.72 | Disease | 1.00 | Probably damaging | 0    | Deleterious |       |             |
| p.Leu32Arg | VUS        | -53.15 | Deleterious   | 0.8215 | Pathogenic | -13.76   | Pathogenic | 0.75 | Disease | 1.00 | Probably damaging | 0    | Deleterious | 32.00 | Deleterious |
| p.Leu32Ser | VUS        | -32.53 | Indeterminate | 0.9828 | Pathogenic | -14.35   | Pathogenic | 0.82 | Disease | 1.00 | Probably damaging | 0    | Deleterious |       |             |
| p.Leu32Ile | VUS        | -0.06  | Neutral       | 0.256  | Benign     | -10.71   | Pathogenic | 0.46 | Neutral | 1.00 | Probably damaging | 0    | Deleterious |       |             |
| p.Leu32Met | VUS        | -0.11  | Neutral       | 0.6061 | Pathogenic | -10.80   | Pathogenic | 0.42 | Neutral | 1.00 | Probably damaging | 0    | Deleterious | 29.00 | Deleterious |
| p.Leu32His | VUS        | -53.15 | Deleterious   | 0.9762 | Pathogenic | -15.47   | Pathogenic | 0.79 | Disease | 1.00 | Probably damaging | 0    | Deleterious |       |             |
| p.Leu32Gln | VUS        | -10.66 | Indeterminate | 0.9367 | Pathogenic | -15.08   | Pathogenic | 0.82 | Disease | 1.00 | Probably damaging | 0    | Deleterious | 29.90 | Deleterious |
| p.Leu32Pro | Pathogenic | -53.15 | Deleterious   | 0.9446 | Pathogenic | -13.13   | Pathogenic | 0.80 | Disease | 1.00 | Probably damaging | 0    | Deleterious | 31.00 | Deleterious |
| p.Leu32Asp | VUS        | -53.15 | Deleterious   | 0.9957 | Pathogenic | -18.43   | Pathogenic | 0.72 | Disease | 1.00 | Probably damaging | 0    | Deleterious |       |             |
| p.Leu32Glu | VUS        | -53.15 | Deleterious   | 0.9666 | Pathogenic | -17.68   | Pathogenic | 0.75 | Disease | 1.00 | Probably damaging | 0    | Deleterious |       |             |
| p.Leu32Ala | VUS        | -18.61 | Indeterminate | 0.8518 | Pathogenic | -14.08   | Pathogenic | 0.70 | Disease | 1.00 | Probably damaging | 0    | Deleterious |       |             |
| p.Leu32Gly | VUS        | -53.15 | Deleterious   | 0.9602 | Pathogenic | -15.95   | Pathogenic | 0.71 | Disease | 1.00 | Probably damaging | 0    | Deleterious |       |             |
| p.Leu32Val | VUS        | -0.05  | Neutral       | 0.3013 | Benign     | -11.51   | Pathogenic | 0.43 | Neutral | 1.00 | Probably damaging | 0    | Deleterious | 28.60 | Deleterious |
| p.Leu32Tyr | VUS        | -53.15 | Deleterious   | 0.9847 | Pathogenic | -15.88   | Pathogenic | 0.70 | Disease | 1.00 | Probably damaging | 0    | Deleterious |       |             |
| p.Leu32Cys | VUS        | -3.18  | Neutral       | 0.9346 | Pathogenic | -11.44   | Pathogenic | 0.65 | Disease | 1.00 | Probably damaging | 0    | Deleterious |       |             |
| p.Leu32Trp | VUS        | -53.15 | Deleterious   | 0.9562 | Pathogenic | -14.68   | Pathogenic | 0.74 | Disease | 1.00 | Probably damaging | 0    | Deleterious |       |             |
| p.Leu32Phe | VUS        | -5.09  | Neutral       | 0.8974 | Pathogenic | -9.81    | Pathogenic | 0.52 | Disease | 1.00 | Probably damaging | 0    | Deleterious |       |             |
| p.Glu33Asn | VUS        | -0.12  | Neutral       | 0.4922 | Ambiguous  | -8.59    | Pathogenic | 0.26 | Neutral | 0.97 | Probably damaging | 0.06 | Tolerated   |       |             |
| p.Glu33Lys | VUS        | -0.41  | Neutral       | 0.2662 | Benign     | -7.44    | Benign     | 0.17 | Neutral | 0.82 | Possibly damaging | 0.56 | Tolerated   | 22.20 | Deleterious |
| p.Glu33Thr | VUS        | -0.19  | Neutral       | 0.3245 | Benign     | -7.16    | Benign     | 0.38 | Neutral | 0.99 | Probably damaging | 0.06 | Tolerated   |       |             |
| p.Glu33Arg | VUS        | -9.24  | Indeterminate | 0.1813 | Benign     | -5.53    | Benign     | 0.27 | Neutral | 0.98 | Probably damaging | 0.46 | Tolerated   |       |             |
| p.Glu33Ser | VUS        | -3.59  | Neutral       | 0.2948 | Benign     | -6.08    | Benign     | 0.37 | Neutral | 0.99 | Probably damaging | 0.06 | Tolerated   |       |             |
| p.Glu33Ile | VUS        | -0.01  | Neutral       | 0.6202 | Pathogenic | -10.00   | Pathogenic | 0.38 | Neutral | 0.99 | Probably damaging | 0.02 | Deleterious |       |             |
| p.Glu33Met | VUS        | -0.01  | Neutral       | 0.6565 | Pathogenic | -9.14    | Pathogenic | 0.44 | Neutral | 0.99 | Probably damaging | 0.02 | Deleterious |       |             |
| p.Glu33His | VUS        | -0.18  | Neutral       | 0.3876 | Ambiguous  | -7.31    | Benign     | 0.31 | Neutral | 0.98 | Probably damaging | 0.25 | Tolerated   |       |             |
| p.Glu33Gln | VUS        | -0.09  | Neutral       | 0.1304 | Benign     | -5.18    | Benign     | 0.16 | Neutral | 0.20 | Benign            | 0.38 | Tolerated   | 15.26 | Deleterious |
| p.Glu33Pro | VUS        | -0.04  | Neutral       | 0.9028 | Pathogenic | -10.54   | Pathogenic | 0.43 | Neutral | 1.00 | Probably damaging | 0.04 | Deleterious |       |             |
| p.Glu33Leu | VUS        | -0.82  | Neutral       | 0.3512 | Ambiguous  | -6.18    | Benign     | 0.28 | Neutral | 0.95 | Possibly damaging | 0.05 | Deleterious |       |             |
| p.Glu33Asp | VUS        | -0.15  | Neutral       | 0.2215 | Benign     | -4.30    | Benign     | 0.17 | Neutral | 0.03 | Benign            | 0.05 | Deleterious | 14.99 | Neutral     |
| p.Glu33Ala | VUS        | -11.39 | Indeterminate | 0.1146 | Benign     | -3.90    | Benign     | 0.21 | Neutral | 0.96 | Probably damaging | 0.07 | Tolerated   | 19.25 | Deleterious |
| p.Glu33Gly | VUS        | -0.32  | Neutral       | 0.1955 | Benign     | -6.08    | Benign     | 0.21 | Neutral | 1.00 | Probably damaging | 0.04 | Deleterious | 23.50 | Deleterious |
| p.Glu33Val | VUS        | -1.44  | Neutral       | 0.3459 | Ambiguous  | -7.67    | Pathogenic | 0.23 | Neutral | 0.95 | Possibly damaging | 0.03 | Deleterious | 23.10 | Deleterious |
| p.Glu33Tyr | VUS        | -9.22  | Indeterminate | 0.7106 | Pathogenic | -10.60   | Pathogenic | 0.38 | Neutral | 1.00 | Probably damaging | 0.02 | Deleterious |       |             |
| p.Glu33Cys | VUS        | -3.97  | Neutral       | 0.8469 | Pathogenic | -8.41    | Pathogenic | 0.38 | Neutral | 1.00 | Probably damaging | 0.01 | Deleterious |       |             |
| p.Glu33Trp | VUS        | -0.26  | Neutral       | 0.8764 | Pathogenic | -10.04   | Pathogenic | 0.45 | Neutral | 1.00 | Probably damaging | 0.01 | Deleterious |       |             |
| p.Glu33Phe | VUS        | -3.58  | Neutral       | 0.7972 | Pathogenic | -10.77   | Pathogenic | 0.39 | Neutral | 1.00 | Probably damaging | 0.01 | Deleterious |       |             |
| p.Ala34Asn | VUS        | -11.51 | Indeterminate | 0.275  | Benign     | -8.01    | Pathogenic | 0.32 | Neutral | 0.99 | Probably damaging | 0.45 | Tolerated   |       |             |
| p.Ala34Lys | VUS        | -1.08  | Neutral       | 0.3383 | Benign     | -6.90    | Benign     | 0.45 | Neutral | 1.00 | Probably damaging | 0.57 | Tolerated   |       |             |
| p.Ala34Thr | VUS        | -5.63  | Neutral       | 0.1519 | Benign     | -7.78    | Pathogenic | 0.31 | Neutral | 0.99 | Probably damaging | 0.57 | Tolerated   | 20.50 | Deleterious |
| p.Ala34Arg | VUS        | -0.01  | Neutral       | 0.2107 | Benign     | -3.95    | Benign     | 0.32 | Neutral | 1.00 | Probably damaging | 0.51 | Tolerated   |       |             |
| p.Ala34Ser | VUS        | -2.77  | Neutral       | 0.1039 | Benign     | -5.61    | Benign     | 0.21 | Neutral | 0.94 | Possibly damaging | 0.62 | Tolerated   | 18.38 | Deleterious |
| p.Ala34Ile | VUS        | -0.97  | Neutral       | 0.4646 | Ambiguous  | -11.26   | Pathogenic | 0.44 | Neutral | 1.00 | Probably damaging | 0.45 | Tolerated   |       |             |
| p.Ala34Met | VUS        | -0.41  | Neutral       | 0.3905 | Ambiguous  | -9.67    | Pathogenic | 0.42 | Neutral | 1.00 | Probably damaging | 0.25 | Tolerated   |       |             |
| p.Ala34His | VUS        | -0.11  | Neutral       | 0.3442 | Ambiguous  | -6.92    | Benign     | 0.46 | Neutral | 1.00 | Probably damaging | 0.57 | Tolerated   |       |             |
| p.Ala34Gln | VUS        | -1.75  | Neutral       | 0.1966 | Benign     | -4.53    | Benign     | 0.34 | Neutral | 1.00 | Probably damaging | 0.46 | Tolerated   |       |             |
| p.Ala34Pro | VUS        | -11.89 | Indeterminate | 0.8853 | Pathogenic | -10.72   | Pathogenic | 0.55 | Disease | 1.00 | Probably damaging | 0.29 | Tolerated   | 23.10 | Deleterious |
| p.Ala34Leu | VUS        | -0.40  | Neutral       | 0.2923 | Benign     | -7.01    | Benign     | 0.44 | Neutral | 1.00 | Probably damaging | 0.75 | Tolerated   |       |             |
| p.Ala34Asp | VUS        | -1.54  | Neutral       | 0.1828 | Benign     | -5.86    | Benign     | 0.33 | Neutral | 1.00 | Probably damaging | 0.38 | Tolerated   |       |             |
| p.Ala34Glu | VUS        | -2.19  | Neutral       | 0.167  | Benign     | -4.98    | Benign     | 0.31 | Neutral | 1.00 | Probably damaging | 0.54 | Tolerated   | 18.56 | Deleterious |
| p.Ala34Gly | VUS        | -2.72  | Neutral       | 0.1321 | Benign     | -4.75    | Benign     | 0.23 | Neutral | 1.00 | Probably damaging | 0.45 | Tolerated   | 22.60 | Deleterious |
| p.Ala34Val | VUS        | -12.28 | Indeterminate | 0.2212 | Benign     | -8.47    | Pathogenic | 0.23 | Neutral | 1.00 | Probably damaging | 0.59 | Tolerated   | 21.90 | Deleterious |
| p.Ala34Tyr | VUS        | -0.23  | Neutral       | 0.5224 | Ambiguous  | -10.87   | Pathogenic | 0.44 | Neutral | 1.00 | Probably damaging | 1    | Tolerated   |       |             |
| p.Ala34Cys | VUS        | -0.28  | Neutral       | 0.562  | Ambiguous  | -8.03    | Pathogenic | 0.41 | Neutral | 1.00 | Probably damaging | 0.19 | Tolerated   |       |             |
| p.Ala34Trp | VUS        | -1.47  | Neutral       | 0.6783 | Pathogenic | -10.10   | Pathogenic | 0.47 | Neutral | 1.00 | Probably damaging | 0.19 | Tolerated   |       |             |
| p.Ala34Phe | VUS        | -0.11  | Neutral       | 0.483  | Ambiguous  | -11.46   | Pathogenic | 0.42 | Neutral | 1.00 | Probably damaging | 0.71 | Tolerated   |       |             |
| p.Gly35Asn | VUS        | -7.34  | Indeterminate | 0.6621 | Pathogenic | -12.62</ |            |      |         |      |                   |      |             |       |             |

|            |     |        |               |        |            |        |            |      |         |      |                   |      |             |       |             |
|------------|-----|--------|---------------|--------|------------|--------|------------|------|---------|------|-------------------|------|-------------|-------|-------------|
| p.Gly35Cys | VUS | -12.62 | Indeterminate | 0.7264 | Pathogenic | -12.78 | Pathogenic | 0.75 | Disease | 1.00 | Probably damaging | 0.01 | Deleterious |       |             |
| p.Gly35Trp | VUS | -53.15 | Deleterious   | 0.8878 | Pathogenic | -14.67 | Pathogenic | 0.70 | Disease | 1.00 | Probably damaging | 0.01 | Deleterious | 32.00 | Deleterious |
| p.Gly35Phe | VUS | -8.93  | Indeterminate | 0.9481 | Pathogenic | -16.86 | Pathogenic | 0.67 | Disease | 1.00 | Probably damaging | 0.01 | Deleterious |       |             |
| p.Ala36Asn | VUS | -21.29 | Indeterminate | 0.4997 | Ambiguous  | -11.26 | Pathogenic | 0.44 | Neutral | 0.55 | Possibly damaging | 0.02 | Deleterious |       |             |
| p.Ala36Lys | VUS | -53.15 | Deleterious   | 0.7005 | Pathogenic | -10.58 | Pathogenic | 0.49 | Neutral | 0.98 | Probably damaging | 0.03 | Deleterious |       |             |
| p.Ala36Thr | VUS | -15.57 | Indeterminate | 0.1621 | Benign     | -5.22  | Benign     | 0.20 | Neutral | 0.02 | Benign            | 0.2  | Tolerated   | 22.70 | Deleterious |
| p.Ala36Arg | VUS | -0.86  | Neutral       | 0.4371 | Ambiguous  | -7.93  | Pathogenic | 0.44 | Neutral | 0.98 | Probably damaging | 0.02 | Deleterious |       |             |
| p.Ala36Ser | VUS | -3.16  | Neutral       | 0.1364 | Benign     | -6.94  | Benign     | 0.34 | Neutral | 0.08 | Benign            | 0.04 | Deleterious | 23.70 | Deleterious |
| p.Ala36Ile | VUS | -0.14  | Neutral       | 0.3407 | Ambiguous  | -8.07  | Pathogenic | 0.45 | Neutral | 0.85 | Possibly damaging | 0.22 | Tolerated   |       |             |
| p.Ala36Met | VUS | 0.00   | Neutral       | 0.3645 | Ambiguous  | -6.87  | Benign     | 0.31 | Neutral | 0.99 | Probably damaging | 0.05 | Deleterious |       |             |
| p.Ala36His | VUS | -0.02  | Neutral       | 0.4481 | Ambiguous  | -7.60  | Pathogenic | 0.43 | Neutral | 1.00 | Probably damaging | 0.01 | Deleterious |       |             |
| p.Ala36Gln | VUS | -0.07  | Neutral       | 0.3982 | Ambiguous  | -5.70  | Benign     | 0.44 | Neutral | 0.99 | Probably damaging | 0.02 | Deleterious |       |             |
| p.Ala36Pro | VUS | -53.15 | Deleterious   | 0.7831 | Pathogenic | -11.46 | Pathogenic | 0.59 | Disease | 0.94 | Possibly damaging | 0.05 | Deleterious | 26.20 | Deleterious |
| p.Ala36Leu | VUS | -5.94  | Indeterminate | 0.2434 | Benign     | -5.75  | Benign     | 0.47 | Neutral | 0.85 | Possibly damaging | 0.29 | Tolerated   |       |             |
| p.Ala36Asp | VUS | -3.54  | Neutral       | 0.5068 | Ambiguous  | -9.06  | Pathogenic | 0.52 | Disease | 0.91 | Possibly damaging | 0.01 | Deleterious |       |             |
| p.Ala36Glu | VUS | -6.72  | Indeterminate | 0.4466 | Ambiguous  | -5.04  | Benign     | 0.46 | Neutral | 0.97 | Probably damaging | 0.03 | Deleterious | 21.60 | Deleterious |
| p.Ala36Gly | VUS | -11.46 | Indeterminate | 0.2002 | Benign     | -7.89  | Pathogenic | 0.32 | Neutral | 0.89 | Possibly damaging | 0.01 | Deleterious | 22.40 | Deleterious |
| p.Ala36Val | VUS | -0.06  | Neutral       | 0.1435 | Benign     | -3.71  | Benign     | 0.18 | Neutral | 0.05 | Benign            | 1    | Tolerated   | 15.30 | Deleterious |
| p.Ala36Tyr | VUS | -4.78  | Neutral       | 0.4751 | Ambiguous  | -9.39  | Pathogenic | 0.43 | Neutral | 0.99 | Probably damaging | 0.01 | Deleterious |       |             |
| p.Ala36Cys | VUS | 0.00   | Neutral       | 0.3531 | Ambiguous  | -6.44  | Benign     | 0.42 | Neutral | 1.00 | Probably damaging | 0.04 | Deleterious |       |             |
| p.Ala36Trp | VUS | 0.00   | Neutral       | 0.6743 | Pathogenic | -8.05  | Pathogenic | 0.52 | Disease | 1.00 | Probably damaging | 0    | Deleterious |       |             |
| p.Ala36Phe | VUS | -2.39  | Neutral       | 0.3369 | Benign     | -9.00  | Pathogenic | 0.45 | Neutral | 0.98 | Probably damaging | 0.03 | Deleterious |       |             |
| p.Leu37Asn | VUS | -0.07  | Neutral       | 0.1197 | Benign     | -0.16  | Benign     | 0.20 | Neutral | 0.08 | Benign            | 0.53 | Tolerated   |       |             |
| p.Leu37Lys | VUS | -8.20  | Indeterminate | 0.1038 | Benign     | -5.18  | Benign     | 0.27 | Neutral | 0.08 | Benign            | 0.86 | Tolerated   |       |             |
| p.Leu37Thr | VUS | -15.43 | Indeterminate | 0.1027 | Benign     | -4.14  | Benign     | 0.24 | Neutral | 0.02 | Benign            | 0.54 | Tolerated   |       |             |
| p.Leu37Arg | VUS | 0.00   | Neutral       | 0.0572 | Benign     | -3.63  | Benign     | 0.12 | Neutral | 0.14 | Benign            | 0.48 | Tolerated   | 13.65 | Neutral     |
| p.Leu37Ser | VUS | -3.05  | Neutral       | 0.0723 | Benign     | 0.97   | Benign     | 0.12 | Neutral | 0.00 | Benign            | 0.76 | Tolerated   |       |             |
| p.Leu37Ile | VUS | -15.63 | Indeterminate | 0.1386 | Benign     | -6.99  | Benign     | 0.18 | Neutral | 0.15 | Benign            | 0.18 | Tolerated   |       |             |
| p.Leu37Met | VUS | -0.02  | Neutral       | 0.1321 | Benign     | -6.51  | Benign     | 0.20 | Neutral | 0.78 | Possibly damaging | 0.1  | Tolerated   | 13.49 | Neutral     |
| p.Leu37His | VUS | -8.27  | Indeterminate | 0.0924 | Benign     | -2.66  | Benign     | 0.13 | Neutral | 0.82 | Possibly damaging | 0.13 | Tolerated   |       |             |
| p.Leu37Gln | VUS | -9.51  | Indeterminate | 0.0564 | Benign     | -3.34  | Benign     | 0.11 | Neutral | 0.14 | Benign            | 0.55 | Tolerated   | 12.85 | Neutral     |
| p.Leu37Pro | VUS | -27.67 | Indeterminate | 0.0683 | Benign     | -0.36  | Benign     | 0.12 | Neutral | 0.00 | Benign            | 0.22 | Tolerated   | 14.31 | Neutral     |
| p.Leu37Asp | VUS | -2.34  | Neutral       | 0.1044 | Benign     | 3.18   | Benign     | 0.21 | Neutral | 0.00 | Benign            | 0.68 | Tolerated   |       |             |
| p.Leu37Glu | VUS | -2.57  | Neutral       | 0.0784 | Benign     | -0.46  | Benign     | 0.29 | Neutral | 0.02 | Benign            | 1    | Tolerated   |       |             |
| p.Leu37Ala | VUS | -0.14  | Neutral       | 0.0689 | Benign     | -1.70  | Benign     | 0.20 | Neutral | 0.01 | Benign            | 0.71 | Tolerated   |       |             |
| p.Leu37Gly | VUS | -2.03  | Neutral       | 0.2015 | Benign     | -2.31  | Benign     | 0.27 | Neutral | 0.02 | Benign            | 0.36 | Tolerated   |       |             |
| p.Leu37Val | VUS | -9.83  | Indeterminate | 0.076  | Benign     | -4.47  | Benign     | 0.13 | Neutral | 0.06 | Benign            | 0.31 | Tolerated   | 10.87 | Neutral     |
| p.Leu37Tyr | VUS | -8.28  | Indeterminate | 0.2359 | Benign     | -5.79  | Benign     | 0.25 | Neutral | 0.82 | Possibly damaging | 0.06 | Tolerated   |       |             |
| p.Leu37Cys | VUS | -0.85  | Neutral       | 0.326  | Benign     | -2.31  | Benign     | 0.26 | Neutral | 0.82 | Possibly damaging | 0.05 | Deleterious |       |             |
| p.Leu37Trp | VUS | -53.15 | Deleterious   | 0.1527 | Benign     | -5.76  | Benign     | 0.25 | Neutral | 0.95 | Possibly damaging | 0.02 | Deleterious |       |             |
| p.Leu37Phe | VUS | -0.24  | Neutral       | 0.1341 | Benign     | -5.89  | Benign     | 0.10 | Neutral | 0.30 | Benign            | 0.06 | Tolerated   |       |             |
| p.Pro38Asn | VUS | -53.15 | Deleterious   | 0.9812 | Pathogenic | -17.83 | Pathogenic | 0.47 | Neutral | 0.97 | Probably damaging | 0.03 | Deleterious |       |             |
| p.Pro38Lys | VUS | -53.15 | Deleterious   | 0.9373 | Pathogenic | -15.62 | Pathogenic | 0.53 | Disease | 0.99 | Probably damaging | 0.06 | Tolerated   |       |             |
| p.Pro38Thr | VUS | -6.12  | Indeterminate | 0.6142 | Pathogenic | -11.08 | Pathogenic | 0.40 | Neutral | 0.75 | Possibly damaging | 0.25 | Tolerated   | 20.60 | Deleterious |
| p.Pro38Arg | VUS | -53.15 | Deleterious   | 0.7822 | Pathogenic | -13.17 | Pathogenic | 0.58 | Disease | 0.99 | Probably damaging | 0.04 | Deleterious | 24.30 | Deleterious |
| p.Pro38Ser | VUS | -17.33 | Indeterminate | 0.7699 | Pathogenic | -11.06 | Pathogenic | 0.59 | Disease | 0.95 | Possibly damaging | 0.07 | Tolerated   | 17.36 | Deleterious |
| p.Pro38Ile | VUS | -18.09 | Indeterminate | 0.7013 | Pathogenic | -12.16 | Pathogenic | 0.47 | Neutral | 0.99 | Probably damaging | 0.61 | Tolerated   |       |             |
| p.Pro38Met | VUS | -27.70 | Indeterminate | 0.9268 | Pathogenic | -14.33 | Pathogenic | 0.47 | Neutral | 1.00 | Probably damaging | 0.1  | Tolerated   |       |             |
| p.Pro38His | VUS | -53.15 | Deleterious   | 0.9314 | Pathogenic | -14.31 | Pathogenic | 0.46 | Neutral | 1.00 | Probably damaging | 0.02 | Deleterious | 24.60 | Deleterious |
| p.Pro38Gln | VUS | -53.15 | Deleterious   | 0.8702 | Pathogenic | -14.75 | Pathogenic | 0.44 | Neutral | 0.99 | Probably damaging | 0.04 | Deleterious |       |             |
| p.Pro38Leu | VUS | -33.22 | Indeterminate | 0.6615 | Pathogenic | -11.99 | Pathogenic | 0.42 | Neutral | 0.98 | Probably damaging | 0.39 | Tolerated   | 24.50 | Deleterious |
| p.Pro38Asp | VUS | -53.15 | Deleterious   | 0.9831 | Pathogenic | -16.69 | Pathogenic | 0.50 | Neutral | 0.96 | Probably damaging | 0.02 | Deleterious |       |             |
| p.Pro38Glu | VUS | -25.68 | Indeterminate | 0.9228 | Pathogenic | -14.43 | Pathogenic | 0.47 | Neutral | 0.78 | Possibly damaging | 0.06 | Tolerated   |       |             |
| p.Pro38Ala | VUS | -53.15 | Deleterious   | 0.297  | Benign     | -6.83  | Benign     | 0.19 | Neutral | 0.03 | Benign            | 0.37 | Tolerated   | 15.27 | Deleterious |
| p.Pro38Gly | VUS | -0.71  | Neutral       | 0.8417 | Pathogenic | -11.38 | Pathogenic | 0.46 | Neutral | 0.95 | Possibly damaging | 0.02 | Deleterious |       |             |
| p.Pro38Val | VUS | -0.53  | Neutral       | 0.3993 | Ambiguous  | -7.82  | Pathogenic | 0.28 | Neutral | 0.74 | Possibly damaging | 1    | Tolerated   |       |             |
| p.Pro38Tyr | VUS | -53.15 | Deleterious   | 0.9766 | Pathogenic | -16.85 | Pathogenic | 0.48 | Neutral | 1.00 | Probably damaging | 0.02 | Deleterious |       |             |
| p.Pro38Cys | VUS | -0.04  | Neutral       | 0.8647 | Pathogenic | -11.25 | Pathogenic | 0.47 | Neutral | 1.00 | Probably damaging | 0.07 | Tolerated   |       |             |
| p.Pro38Trp | VUS | -53.15 | Deleterious   | 0.9811 | Pathogenic | -16.36 | Pathogenic | 0.53 | Disease | 1.00 | Probably damaging | 0.01 | Deleterious |       |             |
| p.Pro38Phe | VUS | -53.15 | Deleterious   | 0.9761 | Pathogenic | -16.36 | Pathogenic | 0.48 | Neutral | 1.00 | Probably damaging | 0.07 | Tolerated   |       |             |
| p.Asn39Lys | VUS | -22.94 | Indeterminate | 0.9206 | Pathogenic | -10.77 | Pathogenic | 0.56 | Disease | 0.97 | Probably damaging | 0.02 | Deleterious | 22.45 | Deleterious |
| p.Asn39Thr | VUS | -0.01  | Neutral       | 0.479  | Ambiguous  | -7.19  | Benign     | 0.47 | Neutral | 0.65 | Possibly damaging | 0.01 | Deleterious | 23.90 | Deleterious |
| p.Asn39Arg | VUS | -3.95  | Neutral       | 0.8501 | Pathogenic | -8.02  | Pathogenic | 0.52 | Disease | 0.99 | Probably damaging | 0.01 | Deleterious |       |             |
| p.Asn39Ser | VUS | -4.05  | Neutral       | 0.1805 | Benign     | -5.65  | Benign     | 0.64 | Disease | 0.95 | Possibly damaging | 0.03 | Deleterious | 22.20 | Deleterious |
| p.Asn39Ile | VUS | -7.95  | Indeterminate | 0.9261 | Pathogenic | -10.35 | Pathogenic | 0.68 | Disease | 0.98 | Probably damaging | 0    | Deleterious | 24.70 | Deleterious |
| p.Asn39Met | VUS | -25.20 | Indeterminate | 0.8921 | Pathogenic | -9.61  | Pathogenic | 0.61 | Disease | 1.00 | Probably damaging | 0    | Deleterious |       |             |
| p.Asn39His | VUS | -0.03  | Neutral       | 0.4608 | Ambiguous  | -7.72  | Pathogenic | 0.36 | Neutral | 0.99 | Probably damaging | 0.01 | Deleterious | 16.04 | Deleterious |
| p.Asn39Gln | VUS | -1.24  | Neutral       | 0.7922 | Pathogenic | -8.55  | Pathogenic | 0.52 | Disease | 0.98 | Probably damaging | 0.01 | Deleterious |       |             |
| p.Asn39Pro | VUS | -53.15 | Deleterious   | 0.9481 | Pathogenic | -11.48 | Pathogenic | 0.53 | Disease | 0.99 | Probably damaging | 0.01 | Deleterious |       |             |
| p.Asn39Leu | VUS | -53.15 | Deleterious   | 0.7873 | Pathogenic | -8.94  | Pathogenic | 0.60 | Disease | 0.98 | Probably damaging | 0    | Deleterious |       |             |
| p.Asn39Asp | VUS | -0.66  | Neutral       | 0.171  | Benign     | -4.01  | Benign     | 0.26 | Neutral | 0.05 | Benign            | 0.62 | Tolerated   | 12.26 | Neutral     |
| p.Asn39Glu | VUS | -1.56  | Neutral       | 0.7546 | Pathogenic | -6.00  | Benign     | 0.51 | Disease | 0.72 | Possibly damaging | 0.02 | Deleterious |       |             |
| p.Asn39Ala | VUS | -6.60  | Indeterminate | 0.6305 | Pathogenic | -6.35  | Benign     | 0.50 | Neutral | 0.74 | Possibly damaging | 0.01 | Deleterious |       |             |
| p.Asn39Gly | VUS | -0.34  | Neutral       | 0.5207 | Ambiguous  | -6.75  | Benign     | 0.50 | Disease | 0.99 | Probably damaging | 0.04 | Deleterious |       |             |
| p.Asn39Val | VUS | -4.58  | Neutral       | 0.8577 | Pathogenic | -7.98  | Pathogenic | 0.59 | Disease | 0.81 | Possibly damaging | 0    | Deleterious |       |             |
| p.Asn39Tyr | VUS | -0.72  | Neutral       | 0.77   | Pathogenic | -12.28 | Pathogenic | 0.58 | Disease | 1.00 | Probably damaging | 0.01 | Deleterious | 22.00 | Deleterious |
| p.Asn39Cys | VUS | -53.15 | Deleterious   | 0.7817 | Pathogenic | -7.10  | Benign     | 0.59 | Disease | 1.00 | Probably damaging | 0    | Deleterious |       |             |
| p.Asn39Trp | VUS | -13.56 | Indeterminate | 0.9764 | Pathogenic | -12.04 | Pathogenic | 0.62 | Disease | 1.00 | Probably damaging | 0    | Deleterious |       |             |
| p.Asn39Phe | VUS | -53.15 | Deleterious   | 0.9575 | Pathogenic | -12.35 | Pathogenic | 0.62 | Disease | 1.00 | Probably damaging | 0    | Deleterious |       |             |
| p.Ala40Asn | VUS | -6.02  | Indeterminate | 0.4103 | Ambiguous  | -12.26 | Pathogenic | 0.37 | Neutral | 0.88 | Possibly damaging | 0.35 | Tolerated   |       |             |
| p.Ala40Lys | VUS | -1.40  | Neutral       | 0.3873 | Ambiguous  | -9.78  | Pathogenic | 0.42 | Neutral | 0.94 | Possibly damaging | 0.65 | Tolerated   |       |             |
| p.Ala40Thr | VUS | -53.15 | Deleterious   | 0.1094 | Benign     | -5.35  | Benign     | 0.13 | Neutral | 0.98 | Probably damaging | 0.49 | Tolerated   | 20.10 | Deleterious |
| p.Ala40Arg | VUS | -2.18  | Neutral       | 0.2217 | Benign     | -7.59  | Pathogenic | 0.40 | Neutral | 0.19 | Benign            | 0.4  | Tolerated   |       |             |
| p.Ala40Ser | VUS | -0.83  | Neutral       | 0.1333 | Benign     | -6.22  | Benign     | 0.17 | Neutral | 0.54 | Possibly damaging | 0.52 | Tolerated   | 22.60 | Deleterious |
| p.Ala40Ile | VUS | -6.06  | Indeterminate | 0.2938 | Benign     | -9.12  | Pathogenic | 0.29 | Neutral | 1.00 | Probably damaging | 0.15 | Tolerated   |       |             |
| p.Ala40Met | VUS | -0.01  | Neutral       | 0.3271 | Benign     | -9.25  | Pathogenic | 0.40 | Neutral | 1.00 | Probably damaging | 0.08 | Tolerated   |       |             |
| p.Ala40His | VUS | -0.39  | Neutral       | 0.3516 | Ambiguous  | -10.41 | Pathogenic | 0.39 | Neutral | 1.00 | Probably damaging | 0.11 | Tolerated   |       |             |
| p.Ala40Gln | VUS | -0.02  | Neutral       | 0.1982 | Benign     | -7.81  | Pathogenic | 0.38 | Neutral | 0.99 | Probably damaging | 0.41 | Tolerated   |       |             |
| p.Ala40Pro | VUS | -12.20 | Indeterminate | 0.5607 | Ambiguous  | -8.42  | Pathogenic | 0.36 | Neutral | 1.00 | Probably damaging | 0.2  | Tolerated   | 24.40 | Deleterious |
| p.Ala40Leu | VUS | -53.15 | Deleterious   | 0.1751 | Benign     | -8.21  | Pathogenic | 0.47 | Neutral | 0.97 | Probably damaging | 0.36 | Tolerated   |       |             |
| p.Ala40Asp | VUS | -17.56 | Indeterminate | 0.3014 | Benign     | -9.74  | Pathogenic | 0.36 | Neutral | 0.98 | Probably damaging | 0.43 | Tolerated   |       |             |
| p.Ala40Glu | VUS | -0.05  | Neutral       | 0.1761 | Benign     | -6.70  | Benign     | 0.36 | Neutral | 0.90 | Possibly damaging | 0.8  | Tolerated   | 16.96 | Deleterious |
| p.Ala40Gly | VUS | -0.94  | Neutral       | 0.1478 | Benign     | -5.36  | Benign     | 0.15 | Neutral | 0.01 | Benign            | 0.33 | Tolerated   | 15.48 | Deleterious |
| p.Ala40Val | VUS | -6.48  | Indeterminate | 0.13   | Benign     | -6.01  | Benign     | 0.19 | Neutral | 0.95 | Possibly damaging | 0.26 | Tolerated   | 21.60 | Deleterious |
| p.Ala40Tyr | VUS | -0.12  | Neutral       | 0.4958 | Ambiguous  | -11.90 | Pathogenic | 0.42 | Neutral | 1.00 | Probably damaging | 0.   |             |       |             |

|            |     |        |               |        |            |        |            |      |         |      |                   |      |             |       |             |
|------------|-----|--------|---------------|--------|------------|--------|------------|------|---------|------|-------------------|------|-------------|-------|-------------|
| p.Pro41Gly | VUS | -1.82  | Neutral       | 0.2599 | Benign     | -7.59  | Pathogenic | 0.26 | Neutral | 0.84 | Possibly damaging | 0.05 | Deleterious |       |             |
| p.Pro41Val | VUS | -0.30  | Neutral       | 0.2118 | Benign     | -1.60  | Benign     | 0.19 | Neutral | 0.00 | Benign            | 1    | Tolerated   |       |             |
| p.Pro41Tyr | VUS | -16.93 | Indeterminate | 0.6575 | Pathogenic | -7.76  | Pathogenic | 0.26 | Neutral | 0.04 | Possibly damaging | 0.11 | Tolerated   |       |             |
| p.Pro41Cys | VUS | -3.07  | Neutral       | 0.5137 | Ambiguous  | -6.71  | Benign     | 0.26 | Neutral | 1.00 | Probably damaging | 0.11 | Tolerated   |       |             |
| p.Pro41Trp | VUS | -6.53  | Indeterminate | 0.6471 | Pathogenic | -10.69 | Pathogenic | 0.29 | Neutral | 1.00 | Probably damaging | 0.03 | Deleterious |       |             |
| p.Pro41Phe | VUS | -4.10  | Neutral       | 0.6351 | Pathogenic | -6.87  | Benign     | 0.26 | Neutral | 0.89 | Possibly damaging | 0.14 | Tolerated   |       |             |
| p.Asn42Lys | VUS | -53.15 | Deleterious   | 0.9801 | Pathogenic | -13.18 | Pathogenic | 0.71 | Disease | 1.00 | Probably damaging | 0    | Deleterious | 22.60 | Deleterious |
| p.Asn42Thr | VUS | -3.68  | Neutral       | 0.6044 | Pathogenic | -9.85  | Pathogenic | 0.64 | Disease | 0.99 | Probably damaging | 0    | Deleterious | 22.70 | Deleterious |
| p.Asn42Arg | VUS | -53.15 | Deleterious   | 0.944  | Pathogenic | -10.75 | Pathogenic | 0.67 | Disease | 1.00 | Probably damaging | 0    | Deleterious |       |             |
| p.Asn42Ser | VUS | -3.19  | Neutral       | 0.2969 | Benign     | -8.85  | Pathogenic | 0.61 | Disease | 1.00 | Probably damaging | 0    | Deleterious | 22.30 | Deleterious |
| p.Asn42Ile | VUS | -53.15 | Deleterious   | 0.9567 | Pathogenic | -12.14 | Pathogenic | 0.82 | Disease | 1.00 | Probably damaging | 0    | Deleterious | 23.00 | Deleterious |
| p.Asn42Met | VUS | -53.15 | Deleterious   | 0.9535 | Pathogenic | -13.26 | Pathogenic | 0.76 | Disease | 1.00 | Probably damaging | 0    | Deleterious |       |             |
| p.Asn42His | VUS | -53.15 | Deleterious   | 0.7557 | Pathogenic | -10.08 | Pathogenic | 0.73 | Disease | 1.00 | Probably damaging | 0    | Deleterious | 23.60 | Deleterious |
| p.Asn42Gln | VUS | -53.15 | Deleterious   | 0.9405 | Pathogenic | -12.35 | Pathogenic | 0.66 | Disease | 1.00 | Probably damaging | 0    | Deleterious |       |             |
| p.Asn42Pro | VUS | -53.15 | Deleterious   | 0.966  | Pathogenic | -12.38 | Pathogenic | 0.71 | Disease | 1.00 | Probably damaging | 0    | Deleterious |       |             |
| p.Asn42Leu | VUS | -53.15 | Deleterious   | 0.8813 | Pathogenic | -11.52 | Pathogenic | 0.75 | Disease | 1.00 | Probably damaging | 0    | Deleterious |       |             |
| p.Asn42Asp | VUS | -10.68 | Indeterminate | 0.5772 | Pathogenic | -7.97  | Pathogenic | 0.64 | Disease | 1.00 | Probably damaging | 0    | Deleterious | 23.80 | Deleterious |
| p.Asn42Glu | VUS | -53.15 | Deleterious   | 0.9572 | Pathogenic | -14.75 | Pathogenic | 0.62 | Disease | 1.00 | Probably damaging | 0    | Deleterious |       |             |
| p.Asn42Ala | VUS | -3.46  | Neutral       | 0.87   | Pathogenic | -10.39 | Pathogenic | 0.69 | Disease | 1.00 | Probably damaging | 0    | Deleterious |       |             |
| p.Asn42Gly | VUS | -0.24  | Neutral       | 0.7349 | Pathogenic | -9.50  | Pathogenic | 0.65 | Disease | 1.00 | Probably damaging | 0    | Deleterious |       |             |
| p.Asn42Val | VUS | -53.15 | Deleterious   | 0.9156 | Pathogenic | -12.01 | Pathogenic | 0.74 | Disease | 1.00 | Probably damaging | 0    | Deleterious |       |             |
| p.Asn42Tyr | VUS | -53.15 | Deleterious   | 0.9089 | Pathogenic | -14.34 | Pathogenic | 0.82 | Disease | 1.00 | Probably damaging | 0    | Deleterious | 24.20 | Deleterious |
| p.Asn42Cys | VUS | -6.36  | Indeterminate | 0.776  | Pathogenic | -12.33 | Pathogenic | 0.73 | Disease | 1.00 | Probably damaging | 0    | Deleterious |       |             |
| p.Asn42Trp | VUS | -53.15 | Deleterious   | 0.9933 | Pathogenic | -14.74 | Pathogenic | 0.76 | Disease | 1.00 | Probably damaging | 0    | Deleterious |       |             |
| p.Asn42Phe | VUS | -53.15 | Deleterious   | 0.9846 | Pathogenic | -14.82 | Pathogenic | 0.75 | Disease | 1.00 | Probably damaging | 0    | Deleterious |       |             |
| p.Ser43Asn | VUS | -3.02  | Neutral       | 0.2256 | Benign     | -5.25  | Benign     | 0.16 | Neutral | 0.02 | Benign            | 0.53 | Tolerated   | 15.04 | Deleterious |
| p.Ser43Lys | VUS | -0.48  | Neutral       | 0.4613 | Ambiguous  | -2.21  | Benign     | 0.23 | Neutral | 0.17 | Benign            | 0.87 | Tolerated   |       |             |
| p.Ser43Thr | VUS | -0.40  | Neutral       | 0.1071 | Benign     | -4.90  | Benign     | 0.13 | Neutral | 0.02 | Benign            | 0.56 | Tolerated   | 14.53 | Neutral     |
| p.Ser43Arg | VUS | -0.31  | Neutral       | 0.23   | Benign     | 0.31   | Benign     | 0.07 | Neutral | 0.00 | Benign            | 0.56 | Tolerated   | 5.19  | Neutral     |
| p.Ser43Ile | VUS | -6.55  | Indeterminate | 0.2521 | Benign     | -6.92  | Benign     | 0.17 | Neutral | 0.77 | Possibly damaging | 0.17 | Tolerated   | 16.76 | Deleterious |
| p.Ser43Met | VUS | -0.84  | Neutral       | 0.4134 | Ambiguous  | -7.16  | Benign     | 0.22 | Neutral | 0.98 | Probably damaging | 0.1  | Tolerated   |       |             |
| p.Ser43His | VUS | -0.33  | Neutral       | 0.2069 | Benign     | -4.76  | Benign     | 0.21 | Neutral | 0.00 | Benign            | 0.13 | Tolerated   |       |             |
| p.Ser43Gln | VUS | -0.30  | Neutral       | 0.279  | Benign     | -4.04  | Benign     | 0.22 | Neutral | 0.47 | Possibly damaging | 0.55 | Tolerated   |       |             |
| p.Ser43Pro | VUS | -0.74  | Neutral       | 0.1875 | Benign     | -5.93  | Benign     | 0.16 | Neutral | 0.78 | Possibly damaging | 0.26 | Tolerated   |       |             |
| p.Ser43Leu | VUS | -1.74  | Neutral       | 0.2431 | Benign     | -6.35  | Benign     | 0.16 | Neutral | 0.47 | Possibly damaging | 0.28 | Tolerated   |       |             |
| p.Ser43Asp | VUS | -1.70  | Neutral       | 0.3709 | Ambiguous  | -6.10  | Benign     | 0.21 | Neutral | 0.33 | Benign            | 0.67 | Tolerated   |       |             |
| p.Ser43Glu | VUS | -0.60  | Neutral       | 0.3541 | Ambiguous  | -4.04  | Benign     | 0.20 | Neutral | 0.13 | Benign            | 1    | Tolerated   |       |             |
| p.Ser43Ala | VUS | -0.70  | Neutral       | 0.0769 | Benign     | -2.11  | Benign     | 0.11 | Neutral | 0.01 | Benign            | 0.71 | Tolerated   |       |             |
| p.Ser43Gly | VUS | -4.02  | Neutral       | 0.0829 | Benign     | -4.55  | Benign     | 0.13 | Neutral | 0.01 | Benign            | 0.43 | Tolerated   | 8.63  | Neutral     |
| p.Ser43Val | VUS | -1.68  | Neutral       | 0.2302 | Benign     | -5.21  | Benign     | 0.21 | Neutral | 0.62 | Possibly damaging | 0.26 | Tolerated   |       |             |
| p.Ser43Tyr | VUS | -2.22  | Neutral       | 0.2925 | Benign     | -8.82  | Pathogenic | 0.22 | Neutral | 0.69 | Possibly damaging | 0.05 | Deleterious |       |             |
| p.Ser43Cys | VUS | -6.00  | Indeterminate | 0.1382 | Benign     | -5.33  | Benign     | 0.14 | Neutral | 0.91 | Possibly damaging | 0.05 | Deleterious | 10.53 | Neutral     |
| p.Ser43Trp | VUS | -2.10  | Neutral       | 0.3461 | Ambiguous  | -7.76  | Pathogenic | 0.27 | Neutral | 0.99 | Probably damaging | 0.02 | Deleterious |       |             |
| p.Ser43Phe | VUS | -1.32  | Neutral       | 0.3716 | Ambiguous  | -9.45  | Pathogenic | 0.18 | Neutral | 0.82 | Possibly damaging | 0.05 | Deleterious |       |             |
| p.Tyr44Asn | VUS | -3.69  | Neutral       | 0.5574 | Ambiguous  | -12.78 | Pathogenic | 0.27 | Neutral | 0.99 | Probably damaging | 0.26 | Tolerated   | 14.06 | Neutral     |
| p.Tyr44Lys | VUS | -8.10  | Indeterminate | 0.7979 | Pathogenic | -13.39 | Pathogenic | 0.31 | Neutral | 0.97 | Probably damaging | 0.15 | Tolerated   |       |             |
| p.Tyr44Thr | VUS | -1.08  | Neutral       | 0.7134 | Pathogenic | -12.72 | Pathogenic | 0.35 | Neutral | 1.00 | Probably damaging | 0.2  | Tolerated   |       |             |
| p.Tyr44Arg | VUS | -3.23  | Neutral       | 0.5169 | Ambiguous  | -10.93 | Pathogenic | 0.29 | Neutral | 1.00 | Probably damaging | 0.15 | Tolerated   |       |             |
| p.Tyr44Ser | VUS | -3.02  | Neutral       | 0.4284 | Ambiguous  | -10.59 | Pathogenic | 0.23 | Neutral | 1.00 | Probably damaging | 0.32 | Tolerated   | 13.61 | Neutral     |
| p.Tyr44Ile | VUS | -3.05  | Neutral       | 0.7981 | Pathogenic | -14.02 | Pathogenic | 0.30 | Neutral | 0.09 | Benign            | 0.18 | Tolerated   |       |             |
| p.Tyr44Met | VUS | -3.22  | Neutral       | 0.816  | Pathogenic | -11.39 | Pathogenic | 0.30 | Neutral | 0.99 | Probably damaging | 0.1  | Tolerated   |       |             |
| p.Tyr44His | VUS | -1.55  | Neutral       | 0.3798 | Ambiguous  | -9.04  | Pathogenic | 0.14 | Neutral | 0.09 | Benign            | 0.24 | Tolerated   | 9.59  | Neutral     |
| p.Tyr44Gln | VUS | -18.21 | Indeterminate | 0.6722 | Pathogenic | -11.73 | Pathogenic | 0.23 | Neutral | 1.00 | Probably damaging | 0.14 | Tolerated   |       |             |
| p.Tyr44Pro | VUS | -32.89 | Indeterminate | 0.9497 | Pathogenic | -13.45 | Pathogenic | 0.30 | Neutral | 1.00 | Probably damaging | 0.11 | Tolerated   |       |             |
| p.Tyr44Leu | VUS | -2.69  | Neutral       | 0.6422 | Pathogenic | -8.40  | Pathogenic | 0.27 | Neutral | 0.00 | Benign            | 0.31 | Tolerated   |       |             |
| p.Tyr44Asp | VUS | -6.48  | Indeterminate | 0.6152 | Pathogenic | -12.63 | Pathogenic | 0.25 | Neutral | 1.00 | Probably damaging | 0.32 | Tolerated   | 14.26 | Neutral     |
| p.Tyr44Glu | VUS | -13.61 | Indeterminate | 0.8125 | Pathogenic | -13.47 | Pathogenic | 0.31 | Neutral | 0.99 | Probably damaging | 0.16 | Tolerated   |       |             |
| p.Tyr44Ala | VUS | -26.29 | Indeterminate | 0.5926 | Pathogenic | -11.13 | Pathogenic | 0.29 | Neutral | 0.98 | Probably damaging | 0.25 | Tolerated   |       |             |
| p.Tyr44Gly | VUS | -11.44 | Indeterminate | 0.5878 | Pathogenic | -12.28 | Pathogenic | 0.30 | Neutral | 1.00 | Probably damaging | 0.22 | Tolerated   |       |             |
| p.Tyr44Val | VUS | -0.88  | Neutral       | 0.6303 | Pathogenic | -12.57 | Pathogenic | 0.32 | Neutral | 0.86 | Possibly damaging | 0.22 | Tolerated   |       |             |
| p.Tyr44Cys | VUS | -2.08  | Neutral       | 0.3951 | Ambiguous  | -9.38  | Pathogenic | 0.20 | Neutral | 1.00 | Probably damaging | 0.08 | Tolerated   | 17.56 | Deleterious |
| p.Tyr44Trp | VUS | -1.96  | Neutral       | 0.3594 | Ambiguous  | -11.11 | Pathogenic | 0.29 | Neutral | 0.96 | Probably damaging | 0.12 | Tolerated   |       |             |
| p.Tyr44Phe | VUS | -2.38  | Neutral       | 0.1446 | Benign     | -3.70  | Benign     | 0.18 | Neutral | 0.00 | Benign            | 1    | Tolerated   | 0.48  | Neutral     |
| p.Gly45Asn | VUS | -1.75  | Neutral       | 0.7484 | Pathogenic | -11.78 | Pathogenic | 0.77 | Disease | 1.00 | Probably damaging | 0.02 | Deleterious |       |             |
| p.Gly45Lys | VUS | -3.95  | Neutral       | 0.877  | Pathogenic | -15.08 | Pathogenic | 0.79 | Disease | 1.00 | Probably damaging | 0.12 | Tolerated   |       |             |
| p.Gly45Thr | VUS | -1.80  | Neutral       | 0.8377 | Pathogenic | -13.43 | Pathogenic | 0.77 | Disease | 1.00 | Probably damaging | 0.01 | Deleterious |       |             |
| p.Gly45Arg | VUS | -0.50  | Neutral       | 0.6263 | Pathogenic | -12.97 | Pathogenic | 0.83 | Disease | 1.00 | Probably damaging | 0.02 | Deleterious | 26.00 | Deleterious |
| p.Gly45Ser | VUS | -10.54 | Indeterminate | 0.4477 | Ambiguous  | -10.50 | Pathogenic | 0.83 | Disease | 1.00 | Probably damaging | 0.03 | Deleterious | 26.00 | Deleterious |
| p.Gly45Ile | VUS | -13.67 | Indeterminate | 0.9659 | Pathogenic | -18.24 | Pathogenic | 0.79 | Disease | 1.00 | Probably damaging | 0    | Deleterious |       |             |
| p.Gly45Met | VUS | -2.56  | Neutral       | 0.9583 | Pathogenic | -15.46 | Pathogenic | 0.79 | Disease | 1.00 | Probably damaging | 0    | Deleterious |       |             |
| p.Gly45His | VUS | -2.01  | Neutral       | 0.7485 | Pathogenic | -14.87 | Pathogenic | 0.77 | Disease | 1.00 | Probably damaging | 0.01 | Deleterious |       |             |
| p.Gly45Gln | VUS | -0.28  | Neutral       | 0.6642 | Pathogenic | -14.02 | Pathogenic | 0.78 | Disease | 1.00 | Probably damaging | 0.01 | Deleterious |       |             |
| p.Gly45Pro | VUS | -53.15 | Deleterious   | 0.9945 | Pathogenic | -18.63 | Pathogenic | 0.76 | Disease | 1.00 | Probably damaging | 0.01 | Deleterious |       |             |
| p.Gly45Leu | VUS | -0.82  | Neutral       | 0.8676 | Pathogenic | -14.32 | Pathogenic | 0.78 | Disease | 1.00 | Probably damaging | 0.01 | Deleterious |       |             |
| p.Gly45Asp | VUS | -0.26  | Neutral       | 0.7037 | Pathogenic | -10.05 | Pathogenic | 0.86 | Disease | 1.00 | Probably damaging | 0.02 | Deleterious | 25.50 | Deleterious |
| p.Gly45Glu | VUS | -1.15  | Neutral       | 0.8048 | Pathogenic | -12.40 | Pathogenic | 0.88 | Disease | 1.00 | Probably damaging | 0.01 | Deleterious |       |             |
| p.Gly45Ala | VUS | -2.19  | Neutral       | 0.5934 | Pathogenic | -11.16 | Pathogenic | 0.83 | Disease | 1.00 | Probably damaging | 0.03 | Deleterious | 24.90 | Deleterious |
| p.Gly45Val | VUS | -21.77 | Indeterminate | 0.9261 | Pathogenic | -14.58 | Pathogenic | 0.87 | Disease | 1.00 | Probably damaging | 0.01 | Deleterious | 25.70 | Deleterious |
| p.Gly45Tyr | VUS | -3.37  | Neutral       | 0.8664 | Pathogenic | -16.39 | Pathogenic | 0.80 | Disease | 1.00 | Probably damaging | 0    | Deleterious |       |             |
| p.Gly45Cys | VUS | -0.52  | Neutral       | 0.7436 | Pathogenic | -13.81 | Pathogenic | 0.89 | Disease | 1.00 | Probably damaging | 0    | Deleterious | 26.90 | Deleterious |
| p.Gly45Trp | VUS | -3.99  | Neutral       | 0.8636 | Pathogenic | -14.99 | Pathogenic | 0.85 | Disease | 1.00 | Probably damaging | 0    | Deleterious |       |             |
| p.Gly45Phe | VUS | -0.09  | Neutral       | 0.9352 | Pathogenic | -16.79 | Pathogenic | 0.80 | Disease | 1.00 | Probably damaging | 0    | Deleterious |       |             |
| p.Arg46Asn | VUS | -0.71  | Neutral       | 0.9806 | Pathogenic | -15.60 | Pathogenic | 0.67 | Disease | 1.00 | Probably damaging | 0.18 | Tolerated   |       |             |
| p.Arg46Lys | VUS | -0.41  | Neutral       | 0.731  | Pathogenic | -13.24 | Pathogenic | 0.48 | Neutral | 1.00 | Probably damaging | 0.58 | Tolerated   |       |             |
| p.Arg46Thr | VUS | -33.07 | Indeterminate | 0.9723 | Pathogenic | -15.00 | Pathogenic | 0.80 | Disease | 1.00 | Probably damaging | 0.08 | Tolerated   |       |             |
| p.Arg46Ser | VUS | -0.32  | Neutral       | 0.9811 | Pathogenic | -13.34 | Pathogenic | 0.80 | Disease | 1.00 | Probably damaging | 0.06 | Tolerated   |       |             |
| p.Arg46Ile | VUS | -53.15 | Deleterious   | 0.9128 | Pathogenic | -17.10 | Pathogenic | 0.74 | Disease | 1.00 | Probably damaging | 0.03 | Deleterious |       |             |
| p.Arg46Met | VUS | -10.71 | Indeterminate | 0.9584 | Pathogenic | -16.82 | Pathogenic | 0.72 | Disease | 1.00 | Probably damaging | 0.02 | Deleterious |       |             |
| p.Arg46His | VUS | -0.53  | Neutral       | 0.6345 | Pathogenic | -13.33 | Pathogenic | 0.66 | Disease | 1.00 | Probably damaging | 0.06 | Tolerated   |       |             |
| p.Arg46Gln | VUS | -14.28 | Indeterminate | 0.5586 | Ambiguous  | -13.16 | Pathogenic | 0.62 | Disease | 1.00 | Probably damaging | 0.16 | Tolerated   | 26.20 | Deleterious |
| p.Arg46Pro | VUS | -53.15 | Deleterious   | 0.9714 | Pathogenic | -16.65 | Pathogenic | 0.87 | Disease | 1.00 | Probably damaging | 0.05 | Deleterious | 25.50 | Deleterious |
| p.Arg46Leu | VUS | -5.97  | Indeterminate | 0.7987 | Pathogenic | -15.22 | Pathogenic | 0.81 | Disease | 1.00 | Probably damaging | 0.21 | Tolerated   | 25.70 | Deleterious |
| p.Arg46Asp | VUS | -53.15 | Deleterious   | 0.9842 | Pathogenic | -18.85 | Pathogenic | 0.77 | Disease | 1.00 | Probably damaging | 0.02 | Deleterious |       |             |
| p.Arg46Glu | VUS | -53.15 | Deleterious   | 0.9098 | Pathogenic | -17.42 | Pathogenic | 0.68 | Disease | 1.00 | Probably damaging | 0.1  | Tolerated   |       |             |
| p.Arg46Ala | VUS | -10.45 | Indeterminate | 0.9674 | Pathogenic | -13.76 | Pathogenic | 0.66 | Disease | 1.00 | Probably damaging | 0.07 | Tolerated   |       |             |
| p.Arg46Gly | VUS | -6.54  | Indeterminate | 0.933  | Pathogenic | -11.73 | Pathogenic |      |         |      |                   |      |             |       |             |

|              |                   |        |               |        |            |        |            |      |         |      |                   |       |             |       |             |
|--------------|-------------------|--------|---------------|--------|------------|--------|------------|------|---------|------|-------------------|-------|-------------|-------|-------------|
| p.Arg47Asp   | VUS               | -53.15 | Deleterious   | 0.9177 | Pathogenic | -15.01 | Pathogenic | 0.37 | Neutral | 0.98 | Probably damaging | 0.08  | Tolerated   |       |             |
| p.Arg47Glu   | VUS               | -3.92  | Neutral       | 0.748  | Pathogenic | -13.09 | Pathogenic | 0.30 | Neutral | 0.53 | Possibly damaging | 0.06  | Tolerated   |       |             |
| p.Arg47Ala   | VUS               | -2.77  | Neutral       | 0.5277 | Ambiguous  | -7.58  | Pathogenic | 0.30 | Neutral | 0.45 | Possibly damaging | 0.18  | Tolerated   |       |             |
| p.Arg47Gly   | VUS               | -9.18  | Indeterminate | 0.4602 | Ambiguous  | -10.59 | Pathogenic | 0.16 | Neutral | 0.86 | Possibly damaging | 0.07  | Tolerated   | 16.41 | Deleterious |
| p.Arg47Val   | VUS               | -1.23  | Neutral       | 0.5757 | Pathogenic | -9.79  | Pathogenic | 0.32 | Neutral | 0.94 | Possibly damaging | 0.08  | Tolerated   |       |             |
| p.Arg47Tyr   | VUS               | -1.99  | Neutral       | 0.5044 | Ambiguous  | -5.05  | Benign     | 0.30 | Neutral | 0.85 | Possibly damaging | 0.02  | Deleterious |       |             |
| p.Arg47Cys   | VUS               | -0.31  | Neutral       | 0.2597 | Benign     | -7.45  | Benign     | 0.15 | Neutral | 1.00 | Probably damaging | 0.03  | Deleterious |       |             |
| p.Arg47Trp   | VUS               | -3.86  | Neutral       | 0.2964 | Benign     | -8.90  | Pathogenic | 0.26 | Neutral | 0.98 | Probably damaging | 0.01  | Deleterious | 22.40 | Deleterious |
| p.Arg47Phe   | VUS               | -0.20  | Neutral       | 0.7065 | Pathogenic | -7.03  | Benign     | 0.32 | Neutral | 0.65 | Possibly damaging | 0.02  | Deleterious |       |             |
| p.Pro48Asn   | VUS               | -53.15 | Deleterious   | 0.9787 | Pathogenic | -17.26 | Pathogenic | 0.64 | Disease | 0.96 | Possibly damaging | 0.04  | Deleterious |       |             |
| p.Pro48Lys   | VUS               | -53.15 | Deleterious   | 0.9943 | Pathogenic | -20.62 | Pathogenic | 0.70 | Disease | 0.99 | Probably damaging | 0.06  | Tolerated   |       |             |
| p.Pro48Thr   | Pathogenic        | -19.30 | Indeterminate | 0.8084 | Pathogenic | -11.01 | Pathogenic | 0.61 | Disease | 0.69 | Possibly damaging | 0.11  | Tolerated   | 16.24 | Deleterious |
| p.Pro48Arg   | VUS               | -53.15 | Deleterious   | 0.9677 | Pathogenic | -16.85 | Pathogenic | 0.73 | Disease | 1.00 | Probably damaging | 0.04  | Deleterious | 25.60 | Deleterious |
| p.Pro48Ser   | VUS               | -4.30  | Neutral       | 0.6914 | Pathogenic | -9.33  | Pathogenic | 0.57 | Disease | 0.93 | Possibly damaging | 0.29  | Tolerated   | 16.81 | Deleterious |
| p.Pro48Ile   | VUS               | -53.15 | Deleterious   | 0.9751 | Pathogenic | -16.41 | Pathogenic | 0.66 | Disease | 0.99 | Probably damaging | 0.04  | Deleterious |       |             |
| p.Pro48Met   | VUS               | -53.15 | Deleterious   | 0.9761 | Pathogenic | -15.41 | Pathogenic | 0.65 | Disease | 1.00 | Probably damaging | 0.03  | Deleterious |       |             |
| p.Pro48His   | VUS               | -53.15 | Deleterious   | 0.9692 | Pathogenic | -17.19 | Pathogenic | 0.64 | Disease | 1.00 | Probably damaging | 0.01  | Deleterious |       |             |
| p.Pro48Gln   | VUS               | -53.15 | Deleterious   | 0.9466 | Pathogenic | -16.15 | Pathogenic | 0.63 | Disease | 0.99 | Probably damaging | 0.04  | Deleterious | 26.00 | Deleterious |
| p.Pro48Leu   | VUS               | -53.15 | Deleterious   | 0.8968 | Pathogenic | -13.24 | Pathogenic | 0.75 | Disease | 0.98 | Probably damaging | 0.06  | Tolerated   | 26.60 | Deleterious |
| p.Pro48Asp   | VUS               | -53.15 | Deleterious   | 0.9925 | Pathogenic | -18.20 | Pathogenic | 0.68 | Disease | 0.95 | Possibly damaging | 0.05  | Deleterious |       |             |
| p.Pro48Glu   | VUS               | -53.15 | Deleterious   | 0.9801 | Pathogenic | -16.52 | Pathogenic | 0.66 | Disease | 0.72 | Possibly damaging | 0.06  | Tolerated   |       |             |
| p.Pro48Ala   | VUS               | -0.04  | Neutral       | 0.314  | Benign     | -5.17  | Benign     | 0.33 | Neutral | 0.01 | Benign            | 1     | Tolerated   | 7.25  | Neutral     |
| p.Pro48Gly   | VUS               | -14.99 | Indeterminate | 0.8399 | Pathogenic | -12.29 | Pathogenic | 0.49 | Neutral | 0.93 | Possibly damaging | 0.31  | Tolerated   |       |             |
| p.Pro48Val   | VUS               | -17.05 | Indeterminate | 0.8808 | Pathogenic | -11.13 | Pathogenic | 0.63 | Disease | 0.68 | Possibly damaging | 0.11  | Tolerated   |       |             |
| p.Pro48Tyr   | VUS               | -53.15 | Deleterious   | 0.9952 | Pathogenic | -19.09 | Pathogenic | 0.65 | Disease | 1.00 | Probably damaging | 0.02  | Deleterious |       |             |
| p.Pro48Cys   | VUS               | -29.75 | Indeterminate | 0.9269 | Pathogenic | -12.01 | Pathogenic | 0.64 | Disease | 1.00 | Probably damaging | 0.06  | Tolerated   |       |             |
| p.Pro48Trp   | VUS               | -53.15 | Deleterious   | 0.9966 | Pathogenic | -19.53 | Pathogenic | 0.65 | Disease | 1.00 | Probably damaging | 0.01  | Deleterious |       |             |
| p.Pro48Phe   | VUS               | -53.15 | Deleterious   | 0.9958 | Pathogenic | -17.68 | Pathogenic | 0.66 | Disease | 0.99 | Probably damaging | -0.02 | Deleterious |       |             |
| p.Ile49Asn   | VUS               | -53.15 | Deleterious   | 0.9737 | Pathogenic | -15.57 | Pathogenic | 0.87 | Disease | 1.00 | Probably damaging | 0     | Deleterious | 26.40 | Deleterious |
| p.Ile49Lys   | VUS               | -53.15 | Deleterious   | 0.9874 | Pathogenic | -19.12 | Pathogenic | 0.84 | Disease | 0.98 | Probably damaging | 0     | Deleterious |       |             |
| p.Ile49Arg   | Likely pathogenic | -29.95 | Indeterminate | 0.9628 | Pathogenic | -12.04 | Pathogenic | 0.68 | Disease | 1.00 | Probably damaging | -0.01 | Deleterious | 25.70 | Deleterious |
| p.Ile49Ser   | Likely pathogenic | -53.15 | Deleterious   | 0.9636 | Pathogenic | -15.14 | Pathogenic | 0.81 | Disease | 1.00 | Probably damaging | 0     | Deleterious |       |             |
| p.Ile49Met   | VUS               | -53.15 | Deleterious   | 0.941  | Pathogenic | -14.12 | Pathogenic | 0.87 | Disease | 1.00 | Probably damaging | 0     | Deleterious | 26.50 | Deleterious |
| p.Ile49His   | VUS               | -1.12  | Neutral       | 0.4493 | Ambiguous  | -9.30  | Pathogenic | 0.61 | Disease | 1.00 | Probably damaging | 0.04  | Deleterious | 19.76 | Deleterious |
| p.Ile49Gln   | VUS               | -53.15 | Deleterious   | 0.9776 | Pathogenic | -14.20 | Pathogenic | 0.79 | Disease | 1.00 | Probably damaging | 0     | Deleterious |       |             |
| p.Ile49Pro   | VUS               | -53.15 | Deleterious   | 0.9677 | Pathogenic | -13.76 | Pathogenic | 0.81 | Disease | 1.00 | Probably damaging | 0.01  | Deleterious |       |             |
| p.Ile49Leu   | VUS               | -53.15 | Deleterious   | 0.9578 | Pathogenic | -13.00 | Pathogenic | 0.77 | Disease | 1.00 | Probably damaging | 0     | Deleterious |       |             |
| p.Ile49Val   | VUS               | -0.37  | Neutral       | 0.2537 | Benign     | -1.42  | Benign     | 0.30 | Neutral | 0.93 | Possibly damaging | 1     | Tolerated   | 17.23 | Deleterious |
| p.Ile49Asp   | VUS               | -53.15 | Deleterious   | 0.9963 | Pathogenic | -18.44 | Pathogenic | 0.79 | Disease | 1.00 | Probably damaging | 0     | Deleterious |       |             |
| p.Ile49Glu   | VUS               | -53.15 | Deleterious   | 0.9845 | Pathogenic | -17.50 | Pathogenic | 0.79 | Disease | 1.00 | Probably damaging | 0     | Deleterious |       |             |
| p.Ile49Ala   | VUS               | -29.55 | Indeterminate | 0.9073 | Pathogenic | -13.41 | Pathogenic | 0.64 | Disease | 1.00 | Probably damaging | 0.01  | Deleterious |       |             |
| p.Ile49Gly   | VUS               | -53.15 | Deleterious   | 0.9822 | Pathogenic | -16.64 | Pathogenic | 0.73 | Disease | 1.00 | Probably damaging | 0     | Deleterious |       |             |
| p.Ile49Val   | VUS               | -0.79  | Neutral       | 0.3085 | Benign     | -6.85  | Benign     | 0.41 | Neutral | 0.95 | Possibly damaging | 0.06  | Tolerated   | 19.03 | Deleterious |
| p.Ile49Tyr   | VUS               | -53.15 | Deleterious   | 0.9512 | Pathogenic | -16.37 | Pathogenic | 0.69 | Disease | 0.99 | Probably damaging | 0     | Deleterious |       |             |
| p.Ile49Cys   | VUS               | -19.59 | Indeterminate | 0.9731 | Pathogenic | -14.94 | Pathogenic | 0.69 | Disease | 1.00 | Probably damaging | 0     | Deleterious |       |             |
| p.Ile49Trp   | VUS               | -53.15 | Deleterious   | 0.9727 | Pathogenic | -16.39 | Pathogenic | 0.71 | Disease | 1.00 | Probably damaging | 0     | Deleterious |       |             |
| p.Ile49Phe   | VUS               | -27.97 | Indeterminate | 0.6763 | Pathogenic | -11.84 | Pathogenic | 0.75 | Disease | 1.00 | Probably damaging | 0.03  | Deleterious | 24.40 | Deleterious |
| p.Gln50Asn   | VUS               | -12.49 | Indeterminate | 0.8074 | Pathogenic | -10.43 | Pathogenic | 0.70 | Disease | 1.00 | Probably damaging | 0.03  | Deleterious |       |             |
| p.Gln50Lys   | VUS               | -53.15 | Deleterious   | 0.9228 | Pathogenic | -17.58 | Pathogenic | 0.76 | Disease | 0.93 | Possibly damaging | 0.07  | Tolerated   | 26.30 | Deleterious |
| p.Gln50Thr   | VUS               | -10.88 | Indeterminate | 0.6796 | Pathogenic | -13.74 | Pathogenic | 0.68 | Disease | 0.96 | Probably damaging | 0.02  | Deleterious |       |             |
| p.Gln50Arg   | VUS               | -53.15 | Deleterious   | 0.84   | Pathogenic | -14.09 | Pathogenic | 0.78 | Disease | 0.96 | Possibly damaging | 0.05  | Deleterious | 28.50 | Deleterious |
| p.Gln50Ser   | VUS               | -5.39  | Neutral       | 0.555  | Ambiguous  | -12.73 | Pathogenic | 0.68 | Disease | 1.00 | Probably damaging | 0.02  | Deleterious |       |             |
| p.Gln50Ile   | VUS               | -53.15 | Deleterious   | 0.9391 | Pathogenic | -17.14 | Pathogenic | 0.75 | Disease | 0.99 | Probably damaging | 0.01  | Deleterious |       |             |
| p.Gln50Met   | VUS               | -2.05  | Neutral       | 0.8088 | Pathogenic | -14.73 | Pathogenic | 0.70 | Disease | 0.99 | Probably damaging | 0     | Deleterious |       |             |
| p.Gln50His   | VUS               | -53.15 | Deleterious   | 0.7198 | Pathogenic | -3.60  | Benign     | 0.75 | Disease | 0.99 | Probably damaging | 0.27  | Tolerated   | 33.00 | Deleterious |
| p.Gln50Pro   | VUS               | -53.15 | Deleterious   | 0.7863 | Pathogenic | -11.25 | Pathogenic | 0.86 | Disease | 1.00 | Probably damaging | 0.02  | Deleterious | 27.60 | Deleterious |
| p.Gln50Leu   | VUS               | -19.95 | Indeterminate | 0.7182 | Pathogenic | -13.31 | Pathogenic | 0.80 | Disease | 0.97 | Probably damaging | 0.01  | Deleterious | 29.80 | Deleterious |
| p.Gln50Asp   | VUS               | -53.15 | Deleterious   | 0.8569 | Pathogenic | -12.67 | Pathogenic | 0.73 | Disease | 1.00 | Probably damaging | 0.03  | Deleterious |       |             |
| p.Gln50Glu   | VUS               | -1.37  | Neutral       | 0.1941 | Benign     | -13.92 | Pathogenic | 0.74 | Disease | 1.00 | Probably damaging | 0.04  | Deleterious | 25.50 | Deleterious |
| p.Gln50Ala   | VUS               | -10.39 | Indeterminate | 0.5825 | Pathogenic | -13.36 | Pathogenic | 0.72 | Disease | 1.00 | Probably damaging | 0.02  | Deleterious |       |             |
| p.Gln50Gly   | VUS               | -13.64 | Indeterminate | 0.7192 | Pathogenic | -12.93 | Pathogenic | 0.70 | Disease | 1.00 | Probably damaging | 0.03  | Deleterious |       |             |
| p.Gln50Val   | VUS               | -53.15 | Deleterious   | 0.87   | Pathogenic | -15.58 | Pathogenic | 0.74 | Disease | 1.00 | Probably damaging | 0.01  | Deleterious |       |             |
| p.Gln50Tyr   | VUS               | -53.15 | Deleterious   | 0.9728 | Pathogenic | -11.61 | Pathogenic | 0.76 | Disease | 1.00 | Probably damaging | 0.01  | Deleterious |       |             |
| p.Gln50Cys   | VUS               | -22.37 | Indeterminate | 0.9729 | Pathogenic | -15.46 | Pathogenic | 0.75 | Disease | 1.00 | Probably damaging | 0     | Deleterious |       |             |
| p.Gln50Trp   | VUS               | -53.15 | Deleterious   | 0.9737 | Pathogenic | -15.75 | Pathogenic | 0.77 | Disease | 1.00 | Probably damaging | 0     | Deleterious |       |             |
| p.Gln50Phe   | VUS               | -53.15 | Deleterious   | 0.9641 | Pathogenic | -15.27 | Pathogenic | 0.75 | Disease | 1.00 | Probably damaging | 0     | Deleterious |       |             |
| p.Val51Asn   | VUS               | -53.15 | Deleterious   | 0.8296 | Pathogenic | -10.66 | Pathogenic | 0.78 | Disease | 1.00 | Probably damaging | 0.01  | Deleterious |       |             |
| p.Val51Lys   | VUS               | -53.15 | Deleterious   | 0.9357 | Pathogenic | -12.52 | Pathogenic | 0.81 | Disease | 1.00 | Probably damaging | 0.01  | Deleterious |       |             |
| p.Val51Thr   | VUS               | -4.90  | Neutral       | 0.6936 | Pathogenic | -7.68  | Pathogenic | 0.55 | Disease | 1.00 | Probably damaging | 0.03  | Deleterious |       |             |
| p.Val51Arg   | VUS               | -53.15 | Deleterious   | 0.8385 | Pathogenic | -11.71 | Pathogenic | 0.81 | Disease | 1.00 | Probably damaging | 0.01  | Deleterious |       |             |
| p.Val51Ser   | VUS               | -0.22  | Neutral       | 0.7805 | Pathogenic | -8.95  | Pathogenic | 0.73 | Disease | 1.00 | Probably damaging | 0.01  | Deleterious |       |             |
| p.Val51Ile   | VUS               | -5.58  | Neutral       | 0.2785 | Benign     | -7.63  | Pathogenic | 0.53 | Disease | 0.96 | Probably damaging | 0.41  | Tolerated   | 28.50 | Deleterious |
| p.Val51Met   | VUS               | -53.15 | Deleterious   | 0.7295 | Pathogenic | -9.08  | Pathogenic | 0.68 | Disease | 1.00 | Probably damaging | 0.02  | Deleterious |       |             |
| p.Val51His   | VUS               | -53.15 | Deleterious   | 0.9476 | Pathogenic | -13.56 | Pathogenic | 0.80 | Disease | 1.00 | Probably damaging | 0     | Deleterious |       |             |
| p.Val51Gln   | VUS               | -53.15 | Deleterious   | 0.8361 | Pathogenic | -11.73 | Pathogenic | 0.78 | Disease | 1.00 | Probably damaging | 0.01  | Deleterious |       |             |
| p.Val51Pro   | VUS               | -53.15 | Deleterious   | 0.9692 | Pathogenic | -12.62 | Pathogenic | 0.80 | Disease | 1.00 | Probably damaging | 0.01  | Deleterious |       |             |
| p.Val51Leu   | VUS               | -1.84  | Neutral       | 0.7283 | Pathogenic | -8.30  | Pathogenic | 0.75 | Disease | 0.96 | Probably damaging | 0.11  | Tolerated   | 31.00 | Deleterious |
| p.Val51Asp   | VUS               | -53.15 | Deleterious   | 0.9045 | Pathogenic | -15.14 | Pathogenic | 0.88 | Disease | 1.00 | Probably damaging | 0.01  | Deleterious | 26.90 | Deleterious |
| p.Val51Glu   | VUS               | -53.15 | Deleterious   | 0.8206 | Pathogenic | -14.07 | Pathogenic | 0.86 | Disease | 1.00 | Probably damaging | 0.01  | Deleterious |       |             |
| p.Val51Ala   | VUS               | -0.01  | Neutral       | 0.6612 | Pathogenic | -6.73  | Benign     | 0.75 | Disease | 1.00 | Probably damaging | 0.04  | Deleterious | 26.30 | Deleterious |
| p.Val51Gly   | VUS               | -3.26  | Neutral       | 0.5831 | Pathogenic | -8.94  | Pathogenic | 0.68 | Disease | 1.00 | Probably damaging | 0.01  | Deleterious | 26.40 | Deleterious |
| p.Val51Tyr   | VUS               | -53.15 | Deleterious   | 0.909  | Pathogenic | -14.19 | Pathogenic | 0.77 | Disease | 1.00 | Probably damaging | 0.12  | Tolerated   |       |             |
| p.Val51Cys   | VUS               | -0.37  | Neutral       | 0.93   | Pathogenic | -11.25 | Pathogenic | 0.76 | Disease | 1.00 | Probably damaging | 0.16  | Tolerated   |       |             |
| p.Val51Trp   | VUS               | -53.15 | Deleterious   | 0.9773 | Pathogenic | -13.51 | Pathogenic | 0.76 | Disease | 1.00 | Probably damaging | 0     | Deleterious |       |             |
| p.Val51Phe   | VUS               | -53.15 | Deleterious   | 0.7444 | Pathogenic | -12.38 | Pathogenic | 0.81 | Disease | 1.00 | Probably damaging | 0.03  | Deleterious | 32.00 | Deleterious |
| p.Met52Asn   | VUS               | -16.42 | Indeterminate | 0.9627 | Pathogenic | -13.68 | Pathogenic | 0.72 | Disease | 1.00 | Probably damaging | 0.14  | Tolerated   |       |             |
| p.Met52Lys   | VUS               | -53.15 | Deleterious   | 0.954  | Pathogenic | -14.14 | Pathogenic | 0.82 | Disease | 0.50 | Possibly damaging | 0.14  | Tolerated   | 27.90 | Deleterious |
| p.Met52Thr   | VUS               | -1.17  | Neutral       | 0.7826 | Pathogenic | -9.07  | Pathogenic | 0.82 | Disease | 0.82 | Possibly damaging | 0.5   | Tolerated   | 26.40 | Deleterious |
| p.Met52Arg   | VUS               | -53.15 | Deleterious   | 0.9272 | Pathogenic | -12.64 | Pathogenic | 0.82 | Disease | 0.68 | Possibly damaging | 0.1   | Tolerated   | 28.50 | Deleterious |
| p.Met52Ser   | VUS               | -0.07  | Neutral       | 0.8548 | Pathogenic | -11.63 | Pathogenic | 0.72 | Disease | 0.98 | Probably damaging | 0.72  | Tolerated   |       |             |
| p.Met52Ile   | VUS               | -7.82  | Indeterminate | 0.9224 | Pathogenic | -11.19 | Pathogenic | 0.74 | Disease | 0.09 | Benign            | 0.16  | Tolerated   | 24.97 | Deleterious |
| p.Met52His   | VUS               | -4.19  | Neutral       | 0.9567 | Pathogenic | -12.75 | Pathogenic | 0.74 | Disease | 1.00 | Probably damaging | 0.04  | Deleterious |       |             |
| p.Met52Gln   | VUS               | -1.31  | Neutral       | 0.7907 | Pathogenic | -9.56  | Pathogenic | 0.70 | Disease | 0.99 | Probably damaging | 0.1   | Tolerated   |       |             |
| p.Met52Pro   | VUS               | -13.05 | Indeterminate | 0.9812 | Pathogenic | -11.77 | Pathogenic | 0.73 | Disease | 0.99 | Probably damaging | 0.26  | Tolerated   |       |             |
| p.Met52Leu</ |                   |        |               |        |            |        |            |      |         |      |                   |       |             |       |             |

|            |                   |        |               |        |            |        |            |      |         |      |                   |      |             |       |             |
|------------|-------------------|--------|---------------|--------|------------|--------|------------|------|---------|------|-------------------|------|-------------|-------|-------------|
| p.Met53Gln | VUS               | -1.49  | Neutral       | 0.4944 | Ambiguous  | -10.26 | Pathogenic | 0.49 | Neutral | 1.00 | Probably damaging | 0.31 | Tolerated   |       |             |
| p.Met53Pro | VUS               | -53.15 | Deleterious   | 0.9676 | Pathogenic | -10.04 | Pathogenic | 0.72 | Disease | 1.00 | Probably damaging | 0.2  | Tolerated   |       |             |
| p.Met53Leu | VUS               | -6.97  | Indeterminate | 0.3533 | Ambiguous  | -5.70  | Benign     | 0.61 | Disease | 0.88 | Possibly damaging | 0.67 | Tolerated   | 25.65 | Deleterious |
| p.Met53Asp | VUS               | -53.15 | Deleterious   | 0.9768 | Pathogenic | -16.24 | Pathogenic | 0.70 | Disease | 1.00 | Probably damaging | 0.2  | Tolerated   |       |             |
| p.Met53Glu | VUS               | -53.15 | Deleterious   | 0.8544 | Pathogenic | -13.12 | Pathogenic | 0.70 | Disease | 1.00 | Probably damaging | 0.29 | Tolerated   |       |             |
| p.Met53Ala | VUS               | -4.27  | Neutral       | 0.7197 | Pathogenic | -9.61  | Pathogenic | 0.69 | Disease | 1.00 | Probably damaging | 0.5  | Tolerated   |       |             |
| p.Met53Gly | VUS               | -53.15 | Deleterious   | 0.8671 | Pathogenic | -12.13 | Pathogenic | 0.70 | Disease | 0.55 | Possibly damaging | 0.31 | Tolerated   |       |             |
| p.Met53Val | Likely pathogenic | -53.15 | Deleterious   | 0.4637 | Ambiguous  | -8.22  | Pathogenic | 0.67 | Disease | 1.00 | Probably damaging | 0.51 | Tolerated   | 25.00 | Deleterious |
| p.Met53Tyr | VUS               | -53.15 | Deleterious   | 0.8966 | Pathogenic | -14.30 | Pathogenic | 0.66 | Disease | 1.00 | Probably damaging | 1    | Tolerated   |       |             |
| p.Met53Cys | VUS               | -11.19 | Indeterminate | 0.9022 | Pathogenic | -12.07 | Pathogenic | 0.72 | Disease | 1.00 | Probably damaging | 0.16 | Tolerated   |       |             |
| p.Met53Trp | VUS               | -53.15 | Deleterious   | 0.9197 | Pathogenic | -12.97 | Pathogenic | 0.67 | Disease | 1.00 | Probably damaging | 0.16 | Tolerated   |       |             |
| p.Met53Phe | VUS               | -53.15 | Deleterious   | 0.647  | Pathogenic | -12.53 | Pathogenic | 0.64 | Disease | 0.93 | Possibly damaging | 0.61 | Tolerated   |       |             |
| p.Met54Asn | VUS               | -1.00  | Neutral       | 0.7165 | Pathogenic | -10.22 | Pathogenic | 0.60 | Disease | 1.00 | Probably damaging | 0.1  | Tolerated   |       |             |
| p.Met54Lys | VUS               | -23.49 | Indeterminate | 0.5076 | Ambiguous  | -13.23 | Pathogenic | 0.71 | Disease | 0.93 | Possibly damaging | 0.16 | Tolerated   | 28.70 | Deleterious |
| p.Met54Thr | VUS               | 0.00   | Neutral       | 0.6814 | Pathogenic | -8.51  | Pathogenic | 0.58 | Disease | 0.98 | Probably damaging | 0.14 | Tolerated   | 27.00 | Deleterious |
| p.Met54Arg | VUS               | -24.87 | Indeterminate | 0.3292 | Benign     | -12.14 | Pathogenic | 0.72 | Disease | 0.97 | Probably damaging | 0.12 | Tolerated   | 29.00 | Deleterious |
| p.Met54Ser | VUS               | -0.03  | Neutral       | 0.6661 | Pathogenic | -9.69  | Pathogenic | 0.61 | Disease | 1.00 | Probably damaging | 0.13 | Tolerated   |       |             |
| p.Met54Ile | VUS               | -0.31  | Neutral       | 0.8666 | Pathogenic | -7.90  | Pathogenic | 0.35 | Neutral | 0.84 | Possibly damaging | 0.36 | Tolerated   | 28.60 | Deleterious |
| p.Met54His | VUS               | -3.79  | Neutral       | 0.584  | Pathogenic | -10.15 | Pathogenic | 0.62 | Disease | 1.00 | Probably damaging | 0.14 | Tolerated   |       |             |
| p.Met54Gln | VUS               | -5.09  | Neutral       | 0.2563 | Benign     | -10.50 | Pathogenic | 0.58 | Disease | 1.00 | Probably damaging | 0.11 | Tolerated   |       |             |
| p.Met54Pro | VUS               | -14.17 | Indeterminate | 0.8247 | Pathogenic | -10.81 | Pathogenic | 0.62 | Disease | 1.00 | Probably damaging | 0.08 | Tolerated   |       |             |
| p.Met54Leu | VUS               | -0.08  | Neutral       | 0.324  | Benign     | -5.24  | Benign     | 0.30 | Neutral | 0.33 | Benign            | 1    | Tolerated   | 24.60 | Deleterious |
| p.Met54Asp | VUS               | -12.93 | Indeterminate | 0.8666 | Pathogenic | -13.16 | Pathogenic | 0.59 | Disease | 1.00 | Probably damaging | 0.13 | Tolerated   |       |             |
| p.Met54Glu | VUS               | -14.17 | Indeterminate | 0.6117 | Pathogenic | -13.35 | Pathogenic | 0.59 | Disease | 1.00 | Probably damaging | 0.11 | Tolerated   |       |             |
| p.Met54Ala | VUS               | -0.10  | Neutral       | 0.5595 | Ambiguous  | -8.78  | Pathogenic | 0.59 | Disease | 0.94 | Possibly damaging | 0.19 | Tolerated   |       |             |
| p.Met54Gly | VUS               | -0.03  | Neutral       | 0.6583 | Pathogenic | -9.91  | Pathogenic | 0.60 | Disease | 1.00 | Probably damaging | 0.1  | Tolerated   |       |             |
| p.Met54Val | VUS               | -0.07  | Neutral       | 0.4549 | Ambiguous  | -6.74  | Benign     | 0.58 | Disease | 1.00 | Probably damaging | 0.27 | Tolerated   | 26.20 | Deleterious |
| p.Met54Tyr | VUS               | -0.82  | Neutral       | 0.6609 | Pathogenic | -9.24  | Pathogenic | 0.59 | Disease | 1.00 | Probably damaging | 0.25 | Tolerated   |       |             |
| p.Met54Cys | VUS               | 0.00   | Neutral       | 0.8017 | Pathogenic | -8.84  | Pathogenic | 0.60 | Disease | 1.00 | Probably damaging | 0.06 | Tolerated   |       |             |
| p.Met54Trp | VUS               | -0.70  | Neutral       | 0.6948 | Pathogenic | -13.35 | Pathogenic | 0.55 | Disease | 1.00 | Probably damaging | 0.06 | Tolerated   |       |             |
| p.Met54Phe | VUS               | -0.04  | Neutral       | 0.4123 | Ambiguous  | -6.99  | Benign     | 0.39 | Neutral | 0.93 | Possibly damaging | 0.35 | Tolerated   |       |             |
| p.Gly55Asn | VUS               | -53.15 | Deleterious   | 0.9308 | Pathogenic | -12.60 | Pathogenic | 0.76 | Disease | 1.00 | Probably damaging | 0.21 | Tolerated   |       |             |
| p.Gly55Lys | VUS               | -53.15 | Deleterious   | 0.9741 | Pathogenic | -14.48 | Pathogenic | 0.77 | Disease | 1.00 | Probably damaging | 0.01 | Deleterious |       |             |
| p.Gly55Thr | VUS               | -53.15 | Deleterious   | 0.9206 | Pathogenic | -13.28 | Pathogenic | 0.77 | Disease | 1.00 | Probably damaging | 0.01 | Deleterious |       |             |
| p.Gly55Arg | VUS               | -53.15 | Deleterious   | 0.9318 | Pathogenic | -10.66 | Pathogenic | 0.78 | Disease | 1.00 | Probably damaging | 0.01 | Deleterious | 30.00 | Deleterious |
| p.Gly55Ser | VUS               | -31.93 | Indeterminate | 0.7309 | Pathogenic | -8.58  | Pathogenic | 0.75 | Disease | 1.00 | Probably damaging | 0.03 | Deleterious | 29.80 | Deleterious |
| p.Gly55Ile | VUS               | -53.15 | Deleterious   | 0.9786 | Pathogenic | -18.91 | Pathogenic | 0.84 | Disease | 1.00 | Probably damaging | 0    | Deleterious |       |             |
| p.Gly55Met | VUS               | -53.15 | Deleterious   | 0.987  | Pathogenic | -18.38 | Pathogenic | 0.83 | Disease | 1.00 | Probably damaging | 0    | Deleterious |       |             |
| p.Gly55His | VUS               | -53.15 | Deleterious   | 0.971  | Pathogenic | -14.25 | Pathogenic | 0.79 | Disease | 1.00 | Probably damaging | 0.01 | Deleterious |       |             |
| p.Gly55Gln | VUS               | -53.15 | Deleterious   | 0.9509 | Pathogenic | -14.01 | Pathogenic | 0.77 | Disease | 1.00 | Probably damaging | 0.01 | Deleterious |       |             |
| p.Gly55Pro | VUS               | -53.15 | Deleterious   | 0.9783 | Pathogenic | -12.38 | Pathogenic | 0.78 | Disease | 0.66 | Possibly damaging | 0.01 | Deleterious |       |             |
| p.Gly55Leu | VUS               | -53.15 | Deleterious   | 0.9734 | Pathogenic | -17.29 | Pathogenic | 0.81 | Disease | 1.00 | Probably damaging | 0    | Deleterious |       |             |
| p.Gly55Asp | VUS               | -53.15 | Deleterious   | 0.9053 | Pathogenic | -11.43 | Pathogenic | 0.81 | Disease | 1.00 | Probably damaging | 0.04 | Deleterious | 29.20 | Deleterious |
| p.Gly55Glu | VUS               | -53.15 | Deleterious   | 0.9242 | Pathogenic | -12.71 | Pathogenic | 0.83 | Disease | 1.00 | Probably damaging | 0.01 | Deleterious |       |             |
| p.Gly55Ala | VUS               | -11.05 | Indeterminate | 0.6234 | Pathogenic | -7.81  | Pathogenic | 0.79 | Disease | 0.99 | Probably damaging | 0.02 | Deleterious | 27.40 | Deleterious |
| p.Gly55Val | VUS               | -53.15 | Deleterious   | 0.9375 | Pathogenic | -15.51 | Pathogenic | 0.89 | Disease | 1.00 | Probably damaging | 0    | Deleterious | 28.90 | Deleterious |
| p.Gly55Tyr | VUS               | -53.15 | Deleterious   | 0.9725 | Pathogenic | -16.46 | Pathogenic | 0.82 | Disease | 1.00 | Probably damaging | 0    | Deleterious |       |             |
| p.Gly55Cys | VUS               | -53.15 | Deleterious   | 0.9277 | Pathogenic | -12.03 | Pathogenic | 0.87 | Disease | 1.00 | Probably damaging | 0    | Deleterious | 32.00 | Deleterious |
| p.Gly55Trp | VUS               | -53.15 | Deleterious   | 0.9668 | Pathogenic | -16.50 | Pathogenic | 0.86 | Disease | 1.00 | Probably damaging | 0    | Deleterious |       |             |
| p.Gly55Phe | VUS               | -53.15 | Deleterious   | 0.9875 | Pathogenic | -18.26 | Pathogenic | 0.84 | Disease | 1.00 | Probably damaging | 0    | Deleterious |       |             |
| p.Ser56Asn | VUS               | 0.00   | Neutral       | 0.2869 | Benign     | -3.98  | Benign     | 0.16 | Neutral | 0.03 | Benign            | 0.9  | Tolerated   | 12.86 | Neutral     |
| p.Ser56Lys | VUS               | -0.10  | Neutral       | 0.925  | Pathogenic | -9.82  | Pathogenic | 0.50 | Neutral | 0.99 | Probably damaging | 0.95 | Tolerated   |       |             |
| p.Ser56Thr | VUS               | -0.47  | Neutral       | 0.3245 | Benign     | -7.24  | Benign     | 0.39 | Neutral | 0.68 | Possibly damaging | 0.62 | Tolerated   | 17.51 | Deleterious |
| p.Ser56Arg | VUS               | 0.00   | Neutral       | 0.863  | Pathogenic | -8.36  | Pathogenic | 0.56 | Disease | 1.00 | Probably damaging | 0.78 | Tolerated   | 24.70 | Deleterious |
| p.Ser56Ile | Pathogenic        | -53.15 | Deleterious   | 0.8369 | Pathogenic | -14.63 | Pathogenic | 0.57 | Disease | 1.00 | Probably damaging | 0.26 | Tolerated   | 22.80 | Deleterious |
| p.Ser56Met | VUS               | 0.00   | Neutral       | 0.7197 | Pathogenic | -13.25 | Pathogenic | 0.54 | Disease | 1.00 | Probably damaging | 0.16 | Tolerated   |       |             |
| p.Ser56His | VUS               | 0.00   | Neutral       | 0.4565 | Ambiguous  | -5.87  | Benign     | 0.33 | Neutral | 1.00 | Probably damaging | 0.37 | Tolerated   |       |             |
| p.Ser56Gln | VUS               | 0.00   | Neutral       | 0.7042 | Pathogenic | -8.58  | Pathogenic | 0.48 | Neutral | 1.00 | Probably damaging | 0.62 | Tolerated   |       |             |
| p.Ser56Pro | VUS               | -53.15 | Deleterious   | 0.8374 | Pathogenic | -7.37  | Benign     | 0.64 | Disease | 1.00 | Probably damaging | 0.29 | Tolerated   |       |             |
| p.Ser56Leu | VUS               | -17.53 | Indeterminate | 0.6522 | Pathogenic | -10.78 | Pathogenic | 0.55 | Disease | 0.99 | Probably damaging | 0.45 | Tolerated   |       |             |
| p.Ser56Asp | VUS               | -0.20  | Neutral       | 0.6454 | Pathogenic | -8.35  | Pathogenic | 0.48 | Neutral | 0.92 | Possibly damaging | 0.62 | Tolerated   |       |             |
| p.Ser56Glu | VUS               | -3.79  | Neutral       | 0.7859 | Pathogenic | -9.46  | Pathogenic | 0.50 | Neutral | 0.97 | Probably damaging | 0.67 | Tolerated   |       |             |
| p.Ser56Ala | VUS               | -0.09  | Neutral       | 0.2536 | Benign     | -8.17  | Pathogenic | 0.43 | Neutral | 0.80 | Possibly damaging | 0.64 | Tolerated   |       |             |
| p.Ser56Gly | VUS               | -2.34  | Neutral       | 0.2343 | Benign     | -7.26  | Benign     | 0.44 | Neutral | 0.39 | Benign            | 0.52 | Tolerated   | 25.70 | Deleterious |
| p.Ser56Val | VUS               | -2.86  | Neutral       | 0.7218 | Pathogenic | -11.82 | Pathogenic | 0.53 | Disease | 1.00 | Probably damaging | 0.36 | Tolerated   |       |             |
| p.Ser56Tyr | VUS               | -0.01  | Neutral       | 0.5949 | Pathogenic | -8.44  | Pathogenic | 0.53 | Disease | 1.00 | Probably damaging | 0.47 | Tolerated   |       |             |
| p.Ser56Cys | VUS               | 0.00   | Neutral       | 0.2089 | Benign     | -8.00  | Pathogenic | 0.30 | Neutral | 1.00 | Probably damaging | 0.12 | Tolerated   | 27.30 | Deleterious |
| p.Ser56Trp | VUS               | -53.15 | Deleterious   | 0.7018 | Pathogenic | -10.80 | Pathogenic | 0.61 | Disease | 1.00 | Probably damaging | 0.1  | Tolerated   |       |             |
| p.Ser56Phe | VUS               | -0.08  | Neutral       | 0.7895 | Pathogenic | -10.42 | Pathogenic | 0.51 | Disease | 1.00 | Probably damaging | 0.42 | Tolerated   |       |             |
| p.Ala57Asn | VUS               | -0.57  | Neutral       | 0.4468 | Ambiguous  | -8.31  | Pathogenic | 0.37 | Neutral | 0.56 | Possibly damaging | 0.46 | Tolerated   |       |             |
| p.Ala57Lys | VUS               | -2.18  | Neutral       | 0.4994 | Ambiguous  | -10.63 | Pathogenic | 0.39 | Neutral | 0.92 | Possibly damaging | 0.87 | Tolerated   |       |             |
| p.Ala57Thr | VUS               | -3.45  | Neutral       | 0.1004 | Benign     | -4.76  | Benign     | 0.10 | Neutral | 0.01 | Benign            | 0.56 | Tolerated   | 5.39  | Neutral     |
| p.Ala57Arg | VUS               | -0.24  | Neutral       | 0.319  | Benign     | -7.61  | Pathogenic | 0.39 | Neutral | 0.98 | Probably damaging | 0.49 | Tolerated   |       |             |
| p.Ala57Ser | VUS               | -4.10  | Neutral       | 0.1098 | Benign     | -5.17  | Benign     | 0.20 | Neutral | 0.08 | Benign            | 0.72 | Tolerated   | 8.12  | Neutral     |
| p.Ala57Ile | VUS               | -1.13  | Neutral       | 0.3926 | Ambiguous  | -11.03 | Pathogenic | 0.29 | Neutral | 0.85 | Possibly damaging | 0.18 | Tolerated   |       |             |
| p.Ala57Met | VUS               | -3.27  | Neutral       | 0.3899 | Ambiguous  | -10.89 | Pathogenic | 0.37 | Neutral | 0.99 | Probably damaging | 0.1  | Tolerated   |       |             |
| p.Ala57His | VUS               | -0.01  | Neutral       | 0.4664 | Ambiguous  | -8.74  | Pathogenic | 0.38 | Neutral | 1.00 | Probably damaging | 0.12 | Tolerated   |       |             |
| p.Ala57Gln | VUS               | -1.67  | Neutral       | 0.3253 | Benign     | -9.50  | Pathogenic | 0.37 | Neutral | 0.99 | Probably damaging | 0.56 | Tolerated   |       |             |
| p.Ala57Pro | VUS               | -4.88  | Neutral       | 0.1227 | Benign     | -4.00  | Benign     | 0.18 | Neutral | 0.02 | Benign            | 0.3  | Tolerated   | 7.88  | Neutral     |
| p.Ala57Leu | VUS               | -9.30  | Indeterminate | 0.267  | Benign     | -8.91  | Pathogenic | 0.37 | Neutral | 0.71 | Possibly damaging | 0.29 | Tolerated   |       |             |
| p.Ala57Asp | VUS               | -0.12  | Neutral       | 0.4412 | Ambiguous  | -10.51 | Pathogenic | 0.35 | Neutral | 0.70 | Possibly damaging | 0.62 | Tolerated   | 18.96 | Deleterious |
| p.Ala57Glu | VUS               | -9.67  | Indeterminate | 0.2968 | Benign     | -10.32 | Pathogenic | 0.32 | Neutral | 0.81 | Possibly damaging | 1    | Tolerated   |       |             |
| p.Ala57Gly | VUS               | -1.14  | Neutral       | 0.1392 | Benign     | -6.10  | Benign     | 0.32 | Neutral | 0.57 | Possibly damaging | 0.36 | Tolerated   | 14.86 | Neutral     |
| p.Ala57Val | Benign            | -0.16  | Neutral       | 0.1532 | Benign     | -7.22  | Benign     | 0.15 | Neutral | 0.01 | Benign            | 0.3  | Tolerated   | 9.79  | Neutral     |
| p.Ala57Tyr | VUS               | -15.97 | Indeterminate | 0.6368 | Pathogenic | -9.29  | Pathogenic | 0.37 | Neutral | 0.99 | Probably damaging | 0.04 | Deleterious |       |             |
| p.Ala57Cys | VUS               | -4.97  | Neutral       | 0.471  | Ambiguous  | -8.78  | Pathogenic | 0.26 | Neutral | 1.00 | Probably damaging | 0.05 | Deleterious |       |             |
| p.Ala57Trp | VUS               | -8.41  | Indeterminate | 0.6804 | Pathogenic | -11.74 | Pathogenic | 0.42 | Neutral | 1.00 | Probably damaging | 0.02 | Deleterious |       |             |
| p.Ala57Phe | VUS               | -15.14 | Indeterminate | 0.5515 | Ambiguous  | -11.25 | Pathogenic | 0.38 | Neutral | 0.98 | Probably damaging | 0.05 | Deleterious |       |             |
| p.Arg58Asn | VUS               | 0.00   | Neutral       | 0.5027 | Ambiguous  | -7.88  | Pathogenic | 0.46 | Neutral | 0.96 | Probably damaging | 0.35 | Tolerated   |       |             |
| p.Arg58Lys | VUS               | 0.00   | Neutral       | 0.1612 | Benign     | -5.06  | Benign     | 0.12 | Neutral | 0.36 | Benign            | 0.69 | Tolerated   |       |             |
| p.Arg58Thr | VUS               | -0.10  | Neutral       | 0.1907 | Benign     | -5.72  | Benign     | 0.41 | Neutral | 0.96 | Probably damaging | 0.44 | Tolerated   |       |             |
| p.Arg58Ser | VUS               | 0.00   | Neutral       | 0.311  | Benign     | -4.61  | Benign     | 0.17 | Neutral | 0.99 | Probably damaging | 0.51 | Tolerated   |       |             |
| p.Arg58Ile | VUS               | 0.00   | Neutral       | 0.3846 | Ambiguous  | -9.99  | Pathogenic | 0.50 | Neutral | 1.00 | Probably damaging | 0.13 | Tolerated   |       |             |
| p.Arg58Met | VUS               | 0.00   | Neutral       | 0.4241 | Ambiguous  | -8.79  | Pathogenic | 0.49 | Neutral | 0.99 | Probably damaging | 0.07 | Tolerated   |       |             |
| p.Arg58His | VUS               | 0.00   | Neutral       | 0.1485 | Benign     | -6.11  | Benign     | 0.19 | Neutral | 0.01 | Benign            | 0.13 | Tolerated   |       |             |
| p.Arg58Gln | VUS               | -0.05  | Neutral       |        |            |        |            |      |         |      |                   |      |             |       |             |

|            |                   |        |               |        |            |        |            |      |         |      |                   |       |             |       |             |
|------------|-------------------|--------|---------------|--------|------------|--------|------------|------|---------|------|-------------------|-------|-------------|-------|-------------|
| p.Val59Ser | VUS               | -4.70  | Neutral       | 0.7444 | Pathogenic | -10.49 | Pathogenic | 0.68 | Disease | 1.00 | Probably damaging | 0     | Deleterious |       |             |
| p.Val59Ile | VUS               | -0.16  | Neutral       | 0.1519 | Benign     | -7.73  | Pathogenic | 0.25 | Neutral | 0.32 | Benign            | 0.93  | Tolerated   |       |             |
| p.Val59Met | VUS               | -1.55  | Neutral       | 0.6448 | Pathogenic | -9.24  | Pathogenic | 0.42 | Neutral | 0.56 | Possibly damaging | 0.01  | Deleterious | 21.90 | Deleterious |
| p.Val59His | VUS               | -53.15 | Deleterious   | 0.979  | Pathogenic | -15.47 | Pathogenic | 0.68 | Disease | 1.00 | Probably damaging | 0     | Deleterious |       |             |
| p.Val59Gln | VUS               | -53.15 | Deleterious   | 0.905  | Pathogenic | -14.47 | Pathogenic | 0.72 | Disease | 0.97 | Probably damaging | 0     | Deleterious |       |             |
| p.Val59Pro | VUS               | -53.15 | Deleterious   | 0.8617 | Pathogenic | -12.37 | Pathogenic | 0.71 | Disease | 1.00 | Probably damaging | 0     | Deleterious |       |             |
| p.Val59Leu | VUS               | -4.37  | Neutral       | 0.6958 | Pathogenic | -9.84  | Pathogenic | 0.34 | Neutral | 0.26 | Benign            | 0.14  | Tolerated   | 16.58 | Deleterious |
| p.Val59Asp | VUS               | -53.15 | Deleterious   | 0.959  | Pathogenic | -14.03 | Pathogenic | 0.79 | Disease | 1.00 | Probably damaging | 0     | Deleterious |       |             |
| p.Val59Glu | VUS               | -53.15 | Deleterious   | 0.8776 | Pathogenic | -12.84 | Pathogenic | 0.82 | Disease | 1.00 | Probably damaging | 0     | Deleterious | 24.40 | Deleterious |
| p.Val59Ala | VUS               | -5.43  | Neutral       | 0.4051 | Ambiguous  | -6.68  | Benign     | 0.59 | Disease | 1.00 | Probably damaging | 0.01  | Deleterious | 23.80 | Deleterious |
| p.Val59Gly | Pathogenic        | -33.22 | Indeterminate | 0.6413 | Pathogenic | -11.20 | Pathogenic | 0.60 | Disease | 1.00 | Probably damaging | 0     | Deleterious | 24.30 | Deleterious |
| p.Val59Tyr | VUS               | -53.15 | Deleterious   | 0.9861 | Pathogenic | -16.57 | Pathogenic | 0.69 | Disease | 1.00 | Probably damaging | 0.01  | Deleterious |       |             |
| p.Val59Cys | VUS               | -0.94  | Neutral       | 0.9254 | Pathogenic | -8.71  | Pathogenic | 0.64 | Disease | 1.00 | Probably damaging | 0     | Deleterious |       |             |
| p.Val59Trp | VUS               | -53.15 | Deleterious   | 0.9946 | Pathogenic | -17.04 | Pathogenic | 0.65 | Disease | 1.00 | Probably damaging | 0     | Deleterious |       |             |
| p.Val59Phe | VUS               | -53.15 | Deleterious   | 0.8967 | Pathogenic | -15.45 | Pathogenic | 0.74 | Disease | 0.99 | Probably damaging | 0.01  | Deleterious |       |             |
| p.Ala60Asn | VUS               | -53.15 | Deleterious   | 0.9602 | Pathogenic | -17.64 | Pathogenic | 0.72 | Disease | 0.98 | Probably damaging | 0.01  | Deleterious |       |             |
| p.Ala60Lys | VUS               | -53.15 | Deleterious   | 0.9921 | Pathogenic | -19.21 | Pathogenic | 0.76 | Disease | 0.99 | Probably damaging | 0.01  | Deleterious |       |             |
| p.Ala60Thr | VUS               | -1.18  | Neutral       | 0.3475 | Ambiguous  | -7.22  | Benign     | 0.62 | Disease | 0.99 | Probably damaging | 0.04  | Deleterious | 25.80 | Deleterious |
| p.Ala60Arg | VUS               | -53.15 | Deleterious   | 0.9613 | Pathogenic | -15.85 | Pathogenic | 0.73 | Disease | 1.00 | Probably damaging | 0.01  | Deleterious |       |             |
| p.Ala60Ser | VUS               | -14.38 | Indeterminate | 0.3268 | Benign     | -8.42  | Pathogenic | 0.62 | Disease | 0.79 | Possibly damaging | 0.03  | Deleterious | 25.10 | Deleterious |
| p.Ala60Ile | VUS               | -22.52 | Indeterminate | 0.8372 | Pathogenic | -11.44 | Pathogenic | 0.74 | Disease | 1.00 | Probably damaging | 0.04  | Deleterious |       |             |
| p.Ala60Met | VUS               | -2.94  | Neutral       | 0.7943 | Pathogenic | -10.80 | Pathogenic | 0.68 | Disease | 1.00 | Probably damaging | 0.01  | Deleterious |       |             |
| p.Ala60His | VUS               | -33.18 | Indeterminate | 0.9832 | Pathogenic | -18.02 | Pathogenic | 0.74 | Disease | 1.00 | Probably damaging | 0     | Deleterious |       |             |
| p.Ala60Gln | VUS               | -53.15 | Deleterious   | 0.9314 | Pathogenic | -16.75 | Pathogenic | 0.74 | Disease | 0.96 | Probably damaging | 0.01  | Deleterious |       |             |
| p.Ala60Pro | VUS               | -18.86 | Indeterminate | 0.9469 | Pathogenic | -10.86 | Pathogenic | 0.80 | Disease | 1.00 | Probably damaging | 0.02  | Deleterious | 25.70 | Deleterious |
| p.Ala60Leu | VUS               | -2.51  | Neutral       | 0.6467 | Pathogenic | -8.43  | Pathogenic | 0.69 | Disease | 1.00 | Probably damaging | 0.03  | Deleterious |       |             |
| p.Ala60Asp | VUS               | -33.22 | Indeterminate | 0.9837 | Pathogenic | -16.66 | Pathogenic | 0.84 | Disease | 1.00 | Probably damaging | 0.01  | Deleterious |       |             |
| p.Ala60Glu | Likely pathogenic | -33.22 | Indeterminate | 0.962  | Pathogenic | -15.15 | Pathogenic | 0.79 | Disease | 0.99 | Probably damaging | 0.01  | Deleterious | 25.40 | Deleterious |
| p.Ala60Gly | VUS               | -1.98  | Neutral       | 0.3107 | Benign     | -9.00  | Pathogenic | 0.62 | Disease | 1.00 | Probably damaging | 0.03  | Deleterious | 26.20 | Deleterious |
| p.Ala60Val | VUS               | -5.18  | Neutral       | 0.4418 | Ambiguous  | -7.31  | Benign     | 0.49 | Neutral | 1.00 | Probably damaging | 0.37  | Tolerated   | 25.80 | Deleterious |
| p.Ala60Tyr | VUS               | -53.15 | Deleterious   | 0.9901 | Pathogenic | -17.64 | Pathogenic | 0.75 | Disease | 1.00 | Probably damaging | 0     | Deleterious |       |             |
| p.Ala60Cys | VUS               | -7.26  | Indeterminate | 0.6622 | Pathogenic | -8.74  | Pathogenic | 0.67 | Disease | 1.00 | Probably damaging | 0.01  | Deleterious |       |             |
| p.Ala60Trp | VUS               | -53.15 | Deleterious   | 0.9927 | Pathogenic | -15.47 | Pathogenic | 0.79 | Disease | 1.00 | Probably damaging | 0     | Deleterious |       |             |
| p.Ala60Phe | VUS               | -53.15 | Deleterious   | 0.9672 | Pathogenic | -13.94 | Pathogenic | 0.74 | Disease | 1.00 | Probably damaging | 0.01  | Deleterious |       |             |
| p.Glu61Asn | VUS               | -1.02  | Neutral       | 0.7007 | Pathogenic | -10.25 | Pathogenic | 0.41 | Neutral | 0.73 | Possibly damaging | 0.48  | Tolerated   |       |             |
| p.Glu61Lys | VUS               | -0.20  | Neutral       | 0.3723 | Ambiguous  | -9.29  | Pathogenic | 0.23 | Neutral | 0.12 | Benign            | 0.89  | Tolerated   | 11.10 | Neutral     |
| p.Glu61Thr | VUS               | -0.31  | Neutral       | 0.5214 | Ambiguous  | -8.09  | Pathogenic | 0.32 | Neutral | 0.79 | Possibly damaging | 0.52  | Tolerated   |       |             |
| p.Glu61Arg | VUS               | -4.80  | Neutral       | 0.2715 | Benign     | -6.99  | Benign     | 0.23 | Neutral | 0.00 | Benign            | 0.52  | Tolerated   |       |             |
| p.Glu61Ser | VUS               | -1.62  | Neutral       | 0.3724 | Ambiguous  | -6.91  | Benign     | 0.29 | Neutral | 0.59 | Possibly damaging | 0.66  | Tolerated   |       |             |
| p.Glu61Ile | VUS               | -2.46  | Neutral       | 0.8797 | Pathogenic | -12.01 | Pathogenic | 0.50 | Disease | 0.75 | Possibly damaging | 0.17  | Tolerated   |       |             |
| p.Glu61Met | VUS               | -2.35  | Neutral       | 0.8462 | Pathogenic | -10.24 | Pathogenic | 0.54 | Disease | 0.62 | Possibly damaging | 0.1   | Tolerated   |       |             |
| p.Glu61His | VUS               | -1.51  | Neutral       | 0.5801 | Pathogenic | -8.60  | Pathogenic | 0.39 | Neutral | 0.82 | Possibly damaging | 0.11  | Tolerated   |       |             |
| p.Glu61Gln | VUS               | -0.25  | Neutral       | 0.1632 | Benign     | -6.32  | Benign     | 0.13 | Neutral | 0.02 | Benign            | 0.53  | Tolerated   | 7.74  | Neutral     |
| p.Glu61Pro | VUS               | -53.15 | Deleterious   | 0.9409 | Pathogenic | -13.42 | Pathogenic | 0.52 | Disease | 0.86 | Possibly damaging | 0.25  | Tolerated   |       |             |
| p.Glu61Leu | VUS               | -0.27  | Neutral       | 0.7588 | Pathogenic | -8.93  | Pathogenic | 0.38 | Neutral | 0.29 | Benign            | 0.31  | Tolerated   |       |             |
| p.Glu61Asp | VUS               | -0.83  | Neutral       | 0.4425 | Ambiguous  | -7.21  | Benign     | 0.33 | Neutral | 0.22 | Benign            | 0.6   | Tolerated   | 12.29 | Neutral     |
| p.Glu61Ala | VUS               | -0.62  | Neutral       | 0.2695 | Benign     | -6.58  | Benign     | 0.19 | Neutral | 0.03 | Benign            | 0.72  | Tolerated   | 13.52 | Neutral     |
| p.Glu61Gly | VUS               | -0.43  | Neutral       | 0.2971 | Benign     | -8.01  | Pathogenic | 0.38 | Neutral | 0.02 | Benign            | 0.34  | Tolerated   | 18.67 | Deleterious |
| p.Glu61Val | VUS               | -0.35  | Neutral       | 0.6779 | Pathogenic | -9.71  | Pathogenic | 0.31 | Neutral | 0.18 | Benign            | 0.26  | Tolerated   | 17.51 | Deleterious |
| p.Glu61Tyr | VUS               | -4.64  | Neutral       | 0.871  | Pathogenic | -12.66 | Pathogenic | 0.50 | Neutral | 0.98 | Probably damaging | 0.04  | Deleterious |       |             |
| p.Glu61Cys | VUS               | -0.54  | Neutral       | 0.9517 | Pathogenic | -10.31 | Pathogenic | 0.53 | Disease | 1.00 | Probably damaging | 0.05  | Deleterious |       |             |
| p.Glu61Trp | VUS               | -1.42  | Neutral       | 0.9523 | Pathogenic | -11.63 | Pathogenic | 0.55 | Disease | 1.00 | Probably damaging | 0.02  | Deleterious |       |             |
| p.Glu61Phe | VUS               | -2.00  | Neutral       | 0.9411 | Pathogenic | -12.68 | Pathogenic | 0.51 | Disease | 0.95 | Possibly damaging | 0.05  | Deleterious |       |             |
| p.Leu62Asn | VUS               | 0.00   | Neutral       | 0.8298 | Pathogenic | -13.59 | Pathogenic | 0.68 | Disease | 1.00 | Probably damaging | 0.09  | Tolerated   |       |             |
| p.Leu62Lys | VUS               | -1.24  | Neutral       | 0.7361 | Pathogenic | -12.18 | Pathogenic | 0.69 | Disease | 0.44 | Benign            | 0.36  | Tolerated   |       |             |
| p.Leu62Thr | VUS               | -0.19  | Neutral       | 0.5488 | Ambiguous  | -7.20  | Benign     | 0.64 | Disease | 1.00 | Probably damaging | 0.14  | Tolerated   |       |             |
| p.Leu62Arg | VUS               | -28.58 | Indeterminate | 0.5057 | Ambiguous  | -10.44 | Pathogenic | 0.69 | Disease | 0.98 | Probably damaging | 0.31  | Tolerated   | 24.20 | Deleterious |
| p.Leu62Ser | VUS               | -0.05  | Neutral       | 0.8354 | Pathogenic | -9.57  | Pathogenic | 0.70 | Disease | 1.00 | Probably damaging | 0.11  | Tolerated   |       |             |
| p.Leu62Ile | VUS               | -7.52  | Indeterminate | 0.1772 | Benign     | -7.87  | Pathogenic | 0.28 | Neutral | 0.99 | Probably damaging | 0.37  | Tolerated   |       |             |
| p.Leu62Met | VUS               | 0.00   | Neutral       | 0.2382 | Benign     | -7.24  | Benign     | 0.43 | Neutral | 1.00 | Probably damaging | 0.21  | Tolerated   | 23.00 | Deleterious |
| p.Leu62His | VUS               | 0.00   | Neutral       | 0.6562 | Pathogenic | -8.78  | Pathogenic | 0.69 | Disease | 1.00 | Probably damaging | 0.08  | Tolerated   |       |             |
| p.Leu62Gln | VUS               | -29.45 | Indeterminate | 0.4796 | Ambiguous  | -7.67  | Pathogenic | 0.69 | Disease | 0.99 | Probably damaging | 0.17  | Tolerated   | 25.70 | Deleterious |
| p.Leu62Pro | VUS               | -13.28 | Indeterminate | 0.9602 | Pathogenic | -12.35 | Pathogenic | 0.83 | Disease | 1.00 | Probably damaging | 0.09  | Tolerated   | 26.00 | Deleterious |
| p.Leu62Asp | VUS               | -0.04  | Neutral       | 0.8998 | Pathogenic | -9.24  | Pathogenic | 0.68 | Disease | 1.00 | Probably damaging | 0.07  | Tolerated   |       |             |
| p.Leu62Glu | VUS               | -0.08  | Neutral       | 0.5869 | Pathogenic | -4.51  | Benign     | 0.68 | Disease | 1.00 | Probably damaging | 0.21  | Tolerated   |       |             |
| p.Leu62Ala | VUS               | -0.01  | Neutral       | 0.5589 | Ambiguous  | -5.18  | Benign     | 0.46 | Neutral | 1.00 | Probably damaging | 0.19  | Tolerated   |       |             |
| p.Leu62Gly | VUS               | -4.09  | Neutral       | 0.8549 | Pathogenic | -11.88 | Pathogenic | 0.63 | Disease | 1.00 | Probably damaging | 0.07  | Tolerated   |       |             |
| p.Leu62Val | VUS               | -0.18  | Neutral       | 0.1734 | Benign     | -4.38  | Benign     | 0.26 | Neutral | 0.95 | Possibly damaging | 0.29  | Tolerated   | 19.78 | Deleterious |
| p.Leu62Tyr | VUS               | -8.39  | Indeterminate | 0.5464 | Ambiguous  | -8.73  | Pathogenic | 0.61 | Disease | 0.98 | Probably damaging | 0.08  | Tolerated   |       |             |
| p.Leu62Cys | VUS               | -5.15  | Neutral       | 0.7386 | Pathogenic | -8.67  | Pathogenic | 0.59 | Disease | 1.00 | Probably damaging | 0.03  | Deleterious |       |             |
| p.Leu62Trp | VUS               | 0.00   | Neutral       | 0.543  | Ambiguous  | -10.97 | Pathogenic | 0.63 | Disease | 1.00 | Probably damaging | -0.03 | Deleterious |       |             |
| p.Leu62Phe | VUS               | 0.00   | Neutral       | 0.4535 | Ambiguous  | -8.48  | Pathogenic | 0.47 | Neutral | 1.00 | Probably damaging | 0.19  | Tolerated   |       |             |
| p.Leu63Asn | VUS               | -53.15 | Deleterious   | 0.9953 | Pathogenic | -17.75 | Pathogenic | 0.84 | Disease | 1.00 | Probably damaging | 0     | Deleterious |       |             |
| p.Leu63Lys | VUS               | -53.15 | Deleterious   | 0.9902 | Pathogenic | -18.24 | Pathogenic | 0.82 | Disease | 0.99 | Probably damaging | 0     | Deleterious |       |             |
| p.Leu63Thr | VUS               | -53.15 | Deleterious   | 0.9863 | Pathogenic | -13.92 | Pathogenic | 0.84 | Disease | 1.00 | Probably damaging | 0     | Deleterious |       |             |
| p.Leu63Arg | VUS               | -53.15 | Deleterious   | 0.9585 | Pathogenic | -13.96 | Pathogenic | 0.93 | Disease | 1.00 | Probably damaging | 0     | Deleterious | 27.60 | Deleterious |
| p.Leu63Ser | VUS               | -53.15 | Deleterious   | 0.9945 | Pathogenic | -12.87 | Pathogenic | 0.92 | Disease | 1.00 | Probably damaging | 0     | Deleterious |       |             |
| p.Leu63Ile | VUS               | -5.21  | Neutral       | 0.7278 | Pathogenic | -10.80 | Pathogenic | 0.70 | Disease | 1.00 | Probably damaging | 0     | Deleterious |       |             |
| p.Leu63Met | VUS               | -0.30  | Neutral       | 0.7228 | Pathogenic | -9.02  | Pathogenic | 0.76 | Disease | 1.00 | Probably damaging | 0     | Deleterious | 25.20 | Deleterious |
| p.Leu63His | VUS               | -53.15 | Deleterious   | 0.9796 | Pathogenic | -14.33 | Pathogenic | 0.91 | Disease | 1.00 | Probably damaging | 0     | Deleterious |       |             |
| p.Leu63Gln | VUS               | -53.15 | Deleterious   | 0.9753 | Pathogenic | -14.73 | Pathogenic | 0.93 | Disease | 1.00 | Probably damaging | 0     | Deleterious | 27.10 | Deleterious |
| p.Leu63Pro | VUS               | -53.15 | Deleterious   | 0.9779 | Pathogenic | -11.69 | Pathogenic | 0.93 | Disease | 1.00 | Probably damaging | 0     | Deleterious | 27.80 | Deleterious |
| p.Leu63Asp | VUS               | -53.15 | Deleterious   | 0.9988 | Pathogenic | -17.88 | Pathogenic | 0.84 | Disease | 1.00 | Probably damaging | 0     | Deleterious |       |             |
| p.Leu63Glu | VUS               | -53.15 | Deleterious   | 0.9929 | Pathogenic | -17.56 | Pathogenic | 0.85 | Disease | 1.00 | Probably damaging | 0     | Deleterious |       |             |
| p.Leu63Ala | VUS               | -53.15 | Deleterious   | 0.9699 | Pathogenic | -12.36 | Pathogenic | 0.83 | Disease | 1.00 | Probably damaging | 0     | Deleterious |       |             |
| p.Leu63Gly | VUS               | -53.15 | Deleterious   | 0.9899 | Pathogenic | -16.36 | Pathogenic | 0.86 | Disease | 1.00 | Probably damaging | 0     | Deleterious |       |             |
| p.Leu63Val | VUS               | -53.15 | Deleterious   | 0.7804 | Pathogenic | -10.79 | Pathogenic | 0.83 | Disease | 0.99 | Probably damaging | 0     | Deleterious | 25.00 | Deleterious |
| p.Leu63Tyr | VUS               | -53.15 | Deleterious   | 0.9691 | Pathogenic | -15.35 | Pathogenic | 0.82 | Disease | 0.99 | Probably damaging | 0     | Deleterious |       |             |
| p.Leu63Cys | VUS               | -53.15 | Deleterious   | 0.9661 | Pathogenic | -12.61 | Pathogenic | 0.79 | Disease | 1.00 | Probably damaging | 0     | Deleterious |       |             |
| p.Leu63Trp | VUS               | -53.15 | Deleterious   | 0.9618 | Pathogenic | -14.79 | Pathogenic | 0.87 | Disease | 1.00 | Probably damaging | 0     | Deleterious |       |             |
| p.Leu63Phe | VUS               | -33.17 | Indeterminate | 0.768  | Pathogenic | -9.89  | Pathogenic | 0.81 | Disease | 1.00 | Probably damaging | 0     | Deleterious |       |             |
| p.Leu64Asn | VUS               | -11.07 | Indeterminate | 0.9826 | Pathogenic | -17.64 | Pathogenic | 0.80 | Disease | 1.00 | Probably damaging | 0     | Deleterious |       |             |
| p.Leu64Lys | VUS               | -2.27  | Neutral       | 0.9752 | Pathogenic | -17.22 | Pathogenic | 0.80 | Disease | 0.99 | Probably damaging | 0     | Deleterious |       |             |
| p.Leu64Thr | VUS               | -0.60  | Neutral       | 0.8919 | Pathogenic | -12.34 | Pathogenic | 0.83 | Disease | 1.00 | Probably damaging | 0.01  | Deleterious |       |             |
| p.Leu64Arg | VUS               | -2.37  | Neutral       | 0.89   | Pathogenic | -13.68 | Pathogenic | 0.88 | Disease | 1.00 | Probably damaging | 0     | Deleterious | 27.70 | Deleterious |
| p.Leu64Ser | VUS               | -0     |               |        |            |        |            |      |         |      |                   |       |             |       |             |

|            |                   |        |               |          |            |        |            |      |         |      |                   |      |             |       |             |
|------------|-------------------|--------|---------------|----------|------------|--------|------------|------|---------|------|-------------------|------|-------------|-------|-------------|
| p.Leu65Lys | VUS               | -0.29  | Neutral       | 0.1691   | Benign     | -5.40  | Benign     | 0.32 | Neutral | 0.97 | Probably damaging | 1    | Tolerated   |       |             |
| p.Leu65Thr | VUS               | -3.35  | Neutral       | 0.1612   | Benign     | -5.99  | Benign     | 0.28 | Neutral | 1.00 | Probably damaging | 0.75 | Tolerated   |       |             |
| p.Leu65Arg | VUS               | -0.66  | Neutral       | 0.0718   | Benign     | -2.33  | Benign     | 0.24 | Neutral | 1.00 | Probably damaging | 0.6  | Tolerated   | 17.13 | Deleterious |
| p.Leu65Ser | VUS               | -2.83  | Neutral       | 0.1969   | Benign     | -4.68  | Benign     | 0.21 | Neutral | 1.00 | Probably damaging | 0.86 | Tolerated   |       |             |
| p.Leu65Ile | VUS               | -1.69  | Neutral       | 0.1806   | Benign     | -8.58  | Pathogenic | 0.21 | Neutral | 0.17 | Benign            | 0.21 | Tolerated   | 17.98 | Deleterious |
| p.Leu65Met | VUS               | -0.21  | Neutral       | 0.1757   | Benign     | -7.29  | Benign     | 0.36 | Neutral | 1.00 | Probably damaging | 0.12 | Tolerated   |       |             |
| p.Leu65His | VUS               | -10.93 | Indeterminate | 0.1732   | Benign     | -4.99  | Benign     | 0.37 | Neutral | 1.00 | Probably damaging | 0.16 | Tolerated   | 22.50 | Deleterious |
| p.Leu65Gln | VUS               | -3.84  | Neutral       | 0.0746   | Benign     | -2.31  | Benign     | 0.19 | Neutral | 1.00 | Probably damaging | 0.61 | Tolerated   |       |             |
| p.Leu65Pro | Likely pathogenic | -53.15 | Deleterious   | 0.7377   | Pathogenic | -9.74  | Pathogenic | 0.31 | Neutral | 1.00 | Probably damaging | 0.3  | Tolerated   | 22.60 | Deleterious |
| p.Leu65Asp | VUS               | -0.82  | Neutral       | 0.4034   | Ambiguous  | -5.28  | Benign     | 0.33 | Neutral | 1.00 | Probably damaging | 0.62 | Tolerated   |       |             |
| p.Leu65Glu | VUS               | -0.42  | Neutral       | 0.1215   | Benign     | -3.10  | Benign     | 0.26 | Neutral | 1.00 | Probably damaging | 0.98 | Tolerated   |       |             |
| p.Leu65Ala | VUS               | -4.46  | Neutral       | 0.1044   | Benign     | -2.87  | Benign     | 0.27 | Neutral | 1.00 | Probably damaging | 0.78 | Tolerated   |       |             |
| p.Leu65Gly | VUS               | -8.22  | Indeterminate | 0.2405   | Benign     | -5.06  | Benign     | 0.43 | Neutral | 1.00 | Probably damaging | 0.4  | Tolerated   |       |             |
| p.Leu65Val | VUS               | -2.08  | Neutral       | 0.1378   | Benign     | -6.10  | Benign     | 0.20 | Neutral | 0.62 | Possibly damaging | 0.31 | Tolerated   | 16.61 | Deleterious |
| p.Leu65Tyr | VUS               | -1.23  | Neutral       | 0.3546   | Ambiguous  | -8.87  | Pathogenic | 0.38 | Neutral | 0.98 | Probably damaging | 0.09 | Tolerated   |       |             |
| p.Leu65Cys | VUS               | -13.13 | Indeterminate | 0.4305   | Ambiguous  | -6.24  | Benign     | 0.30 | Neutral | 1.00 | Probably damaging | 0.07 | Tolerated   |       |             |
| p.Leu65Trp | VUS               | -7.73  | Indeterminate | 0.2329   | Benign     | -7.17  | Benign     | 0.43 | Neutral | 1.00 | Probably damaging | 0.03 | Deleterious |       |             |
| p.Leu65Phe | VUS               | -1.85  | Neutral       | 0.1992   | Benign     | -9.10  | Pathogenic | 0.28 | Neutral | 0.99 | Probably damaging | 0.08 | Tolerated   | 22.60 | Deleterious |
| p.His66Asn | VUS               | -0.16  | Neutral       | 0.3884   | Ambiguous  | -7.58  | Pathogenic | 0.26 | Neutral | 1.00 | Probably damaging | 0.04 | Deleterious | 22.90 | Deleterious |
| p.His66Lys | VUS               | -0.18  | Neutral       | 0.5891   | Pathogenic | -6.91  | Benign     | 0.30 | Neutral | 0.60 | Possibly damaging | 0.16 | Tolerated   |       |             |
| p.His66Thr | VUS               | -2.36  | Neutral       | 0.7957   | Pathogenic | -8.87  | Pathogenic | 0.49 | Neutral | 0.99 | Probably damaging | 0.05 | Deleterious |       |             |
| p.His66Arg | VUS               | -1.93  | Neutral       | 0.1748   | Benign     | -4.29  | Benign     | 0.17 | Neutral | 0.01 | Benign            | 0.41 | Tolerated   | 22.90 | Deleterious |
| p.His66Ser | VUS               | -0.93  | Neutral       | 0.5326   | Ambiguous  | -5.19  | Benign     | 0.28 | Neutral | 1.00 | Probably damaging | 0.04 | Deleterious |       |             |
| p.His66Ile | VUS               | -7.66  | Indeterminate | 0.8784   | Pathogenic | -12.43 | Pathogenic | 0.51 | Disease | 0.99 | Probably damaging | 0.03 | Deleterious |       |             |
| p.His66Met | VUS               | -0.24  | Neutral       | 0.8768   | Pathogenic | -8.28  | Pathogenic | 0.47 | Neutral | 1.00 | Probably damaging | 0.02 | Deleterious |       |             |
| p.His66Gln | VUS               | -1.10  | Neutral       | 0.4119   | Ambiguous  | -6.28  | Benign     | 0.24 | Neutral | 0.99 | Probably damaging | 0.29 | Tolerated   | 22.85 | Deleterious |
| p.His66Pro | VUS               | -53.15 | Deleterious   | 0.7036   | Pathogenic | -10.87 | Pathogenic | 0.51 | Disease | 1.00 | Probably damaging | 0.03 | Deleterious | 25.00 | Deleterious |
| p.His66Leu | VUS               | -1.55  | Neutral       | 0.467    | Ambiguous  | -6.67  | Benign     | 0.28 | Neutral | 0.70 | Possibly damaging | 0.06 | Tolerated   | 23.40 | Deleterious |
| p.His66Asp | VUS               | -1.70  | Neutral       | 0.7664   | Pathogenic | -8.82  | Pathogenic | 0.47 | Neutral | 1.00 | Probably damaging | 0.02 | Deleterious | 24.00 | Deleterious |
| p.His66Glu | VUS               | -3.12  | Neutral       | 0.6101   | Pathogenic | -6.34  | Benign     | 0.43 | Neutral | 1.00 | Probably damaging | 0.05 | Deleterious |       |             |
| p.His66Ala | VUS               | -2.15  | Neutral       | 0.4953   | Ambiguous  | -2.59  | Benign     | 0.31 | Neutral | 1.00 | Probably damaging | 0.05 | Deleterious |       |             |
| p.His66Gly | VUS               | -0.74  | Neutral       | 0.5323   | Ambiguous  | -5.55  | Benign     | 0.46 | Neutral | 1.00 | Probably damaging | 0.04 | Deleterious |       |             |
| p.His66Val | VUS               | -5.55  | Neutral       | 0.735    | Pathogenic | -8.00  | Pathogenic | 0.44 | Neutral | 1.00 | Probably damaging | 0.04 | Deleterious |       |             |
| p.His66Tyr | VUS               | -1.24  | Neutral       | 0.1475   | Benign     | -5.71  | Benign     | 0.25 | Neutral | 0.95 | Possibly damaging | 0.54 | Tolerated   | 18.56 | Deleterious |
| p.His66Cys | VUS               | -0.01  | Neutral       | 0.3504   | Ambiguous  | -7.06  | Benign     | 0.46 | Neutral | 1.00 | Probably damaging | 0.01 | Deleterious |       |             |
| p.His66Trp | VUS               | -0.25  | Neutral       | 0.4002   | Ambiguous  | -6.01  | Benign     | 0.50 | Neutral | 1.00 | Probably damaging | 0.02 | Deleterious |       |             |
| p.His66Phe | VUS               | -0.70  | Neutral       | 0.4537   | Ambiguous  | -7.03  | Benign     | 0.44 | Neutral | 0.99 | Probably damaging | 0.05 | Deleterious |       |             |
| p.Gly67Asn | VUS               | -0.13  | Neutral       | 0.7348   | Pathogenic | -10.55 | Pathogenic | 0.66 | Disease | 1.00 | Probably damaging | 0    | Deleterious |       |             |
| p.Gly67Lys | VUS               | -0.88  | Neutral       | 0.7226   | Pathogenic | -10.78 | Pathogenic | 0.69 | Disease | 1.00 | Probably damaging | 0    | Deleterious |       |             |
| p.Gly67Thr | VUS               | -9.71  | Indeterminate | 0.7928   | Pathogenic | -13.00 | Pathogenic | 0.66 | Disease | 1.00 | Probably damaging | 0    | Deleterious |       |             |
| p.Gly67Arg | VUS               | 0.00   | Neutral       | 0.5034   | Ambiguous  | -8.24  | Pathogenic | 0.76 | Disease | 1.00 | Probably damaging | 0    | Deleterious | 28.20 | Deleterious |
| p.Gly67Ser | VUS               | -0.07  | Neutral       | 0.4193   | Ambiguous  | -9.72  | Pathogenic | 0.68 | Disease | 1.00 | Probably damaging | 0    | Deleterious | 27.90 | Deleterious |
| p.Gly67Ile | VUS               | -53.15 | Deleterious   | 0.9677   | Pathogenic | -17.56 | Pathogenic | 0.72 | Disease | 1.00 | Probably damaging | 0    | Deleterious |       |             |
| p.Gly67Met | VUS               | -2.62  | Neutral       | 0.9648   | Pathogenic | -14.65 | Pathogenic | 0.73 | Disease | 1.00 | Probably damaging | 0    | Deleterious |       |             |
| p.Gly67His | VUS               | -0.01  | Neutral       | 0.687    | Pathogenic | -9.44  | Pathogenic | 0.70 | Disease | 1.00 | Probably damaging | 0    | Deleterious |       |             |
| p.Gly67Gln | VUS               | 0.00   | Neutral       | 0.6087   | Pathogenic | -10.71 | Pathogenic | 0.67 | Disease | 1.00 | Probably damaging | 0    | Deleterious |       |             |
| p.Gly67Pro | VUS               | -53.15 | Deleterious   | 0.9938   | Pathogenic | -15.59 | Pathogenic | 0.66 | Disease | 1.00 | Probably damaging | 0    | Deleterious |       |             |
| p.Gly67Leu | VUS               | -0.43  | Neutral       | 0.9284   | Pathogenic | -12.85 | Pathogenic | 0.71 | Disease | 1.00 | Probably damaging | 0    | Deleterious |       |             |
| p.Gly67Asp | VUS               | -0.22  | Neutral       | 0.4936   | Ambiguous  | -9.88  | Pathogenic | 0.74 | Disease | 1.00 | Probably damaging | 0    | Deleterious | 26.10 | Deleterious |
| p.Gly67Glu | VUS               | -0.17  | Neutral       | 0.7102   | Pathogenic | -11.05 | Pathogenic | 0.76 | Disease | 1.00 | Probably damaging | 0    | Deleterious |       |             |
| p.Gly67Ala | VUS               | 0.00   | Neutral       | 0.5522   | Ambiguous  | -9.56  | Pathogenic | 0.49 | Neutral | 1.00 | Probably damaging | 0    | Deleterious | 25.00 | Deleterious |
| p.Gly67Val | VUS               | -53.15 | Deleterious   | 0.9212   | Pathogenic | -13.26 | Pathogenic | 0.81 | Disease | 1.00 | Probably damaging | 0    | Deleterious | 25.90 | Deleterious |
| p.Gly67Tyr | VUS               | -0.17  | Neutral       | 0.9176   | Pathogenic | -13.91 | Pathogenic | 0.73 | Disease | 1.00 | Probably damaging | 0    | Deleterious |       |             |
| p.Gly67Cys | VUS               | -1.96  | Neutral       | 0.7922   | Pathogenic | -11.77 | Pathogenic | 0.56 | Disease | 1.00 | Probably damaging | 0    | Deleterious | 29.30 | Deleterious |
| p.Gly67Trp | VUS               | -5.92  | Indeterminate | 0.9304   | Pathogenic | -13.32 | Pathogenic | 0.75 | Disease | 1.00 | Probably damaging | 0    | Deleterious |       |             |
| p.Gly67Phe | VUS               | -1.32  | Neutral       | 0.9653   | Pathogenic | -14.69 | Pathogenic | 0.72 | Disease | 1.00 | Probably damaging | 0    | Deleterious |       |             |
| p.Ala68Asn | VUS               | -53.15 | Deleterious   | 0.9679   | Pathogenic | -18.24 | Pathogenic | 0.75 | Disease | 1.00 | Probably damaging | 0    | Deleterious |       |             |
| p.Ala68Lys | VUS               | -53.15 | Deleterious   | 0.9925   | Pathogenic | -22.22 | Pathogenic | 0.78 | Disease | 1.00 | Probably damaging | 0    | Deleterious |       |             |
| p.Ala68Thr | VUS               | -2.88  | Neutral       | 0.5914   | Pathogenic | -11.27 | Pathogenic | 0.73 | Disease | 1.00 | Probably damaging | 0    | Deleterious | 26.20 | Deleterious |
| p.Ala68Arg | VUS               | -53.15 | Deleterious   | 0.9558   | Pathogenic | -20.11 | Pathogenic | 0.76 | Disease | 1.00 | Probably damaging | 0    | Deleterious |       |             |
| p.Ala68Ser | VUS               | -0.59  | Neutral       | 0.293    | Benign     | -10.10 | Pathogenic | 0.54 | Disease | 0.99 | Probably damaging | 0    | Deleterious | 25.50 | Deleterious |
| p.Ala68Ile | VUS               | -53.15 | Deleterious   | 0.9189   | Pathogenic | -17.35 | Pathogenic | 0.78 | Disease | 1.00 | Probably damaging | 0    | Deleterious |       |             |
| p.Ala68Met | VUS               | -33.17 | Indeterminate | 0.9229   | Pathogenic | -16.44 | Pathogenic | 0.72 | Disease | 1.00 | Probably damaging | 0    | Deleterious |       |             |
| p.Ala68His | VUS               | -24.88 | Indeterminate | 0.9743   | Pathogenic | -19.04 | Pathogenic | 0.79 | Disease | 1.00 | Probably damaging | 0    | Deleterious |       |             |
| p.Ala68Gln | VUS               | -53.15 | Deleterious   | 0.9384   | Pathogenic | -18.21 | Pathogenic | 0.77 | Disease | 1.00 | Probably damaging | 0    | Deleterious |       |             |
| p.Ala68Pro | VUS               | -53.15 | Deleterious   | 0.9539   | Pathogenic | -15.22 | Pathogenic | 0.82 | Disease | 1.00 | Probably damaging | 0    | Deleterious | 26.30 | Deleterious |
| p.Ala68Leu | Likely pathogenic | -53.15 | Deleterious   | 0.8086   | Pathogenic | -16.58 | Pathogenic | 0.76 | Disease | 1.00 | Probably damaging | 0    | Deleterious |       |             |
| p.Ala68Asp | VUS               | -32.95 | Indeterminate | 0.9549   | Pathogenic | -15.96 | Pathogenic | 0.84 | Disease | 1.00 | Probably damaging | 0    | Deleterious |       |             |
| p.Ala68Glu | VUS               | -32.02 | Indeterminate | 0.9619   | Pathogenic | -16.60 | Pathogenic | 0.81 | Disease | 1.00 | Probably damaging | 0    | Deleterious | 25.70 | Deleterious |
| p.Ala68Gly | VUS               | -1.38  | Neutral       | 0.3176   | Benign     | -8.95  | Pathogenic | 0.62 | Disease | 1.00 | Probably damaging | 0    | Deleterious | 26.00 | Deleterious |
| p.Ala68Val | VUS               | -10.00 | Indeterminate | 0.676    | Pathogenic | -10.83 | Pathogenic | 0.70 | Disease | 1.00 | Probably damaging | 0    | Deleterious | 26.10 | Deleterious |
| p.Ala68Tyr | VUS               | -53.15 | Deleterious   | 0.9825   | Pathogenic | -19.51 | Pathogenic | 0.78 | Disease | 1.00 | Probably damaging | 0    | Deleterious |       |             |
| p.Ala68Cys | VUS               | -0.84  | Neutral       | 0.7551   | Pathogenic | -11.43 | Pathogenic | 0.70 | Disease | 1.00 | Probably damaging | 0    | Deleterious |       |             |
| p.Ala68Trp | VUS               | -53.15 | Deleterious   | 0.9882   | Pathogenic | -19.71 | Pathogenic | 0.78 | Disease | 1.00 | Probably damaging | 0    | Deleterious |       |             |
| p.Ala68Phe | VUS               | -53.15 | Deleterious   | 0.9666   | Pathogenic | -18.42 | Pathogenic | 0.79 | Disease | 1.00 | Probably damaging | 0    | Deleterious |       |             |
| p.Glu69Asn | VUS               | -53.15 | Deleterious   | 0.3183   | Benign     | -3.89  | Benign     | 0.21 | Neutral | 0.04 | Benign            | 1    | Tolerated   |       |             |
| p.Glu69Lys | VUS               | -33.00 | Indeterminate | 0.472    | Ambiguous  | -9.75  | Pathogenic | 0.25 | Neutral | 0.00 | Benign            | 0.49 | Tolerated   | 22.00 | Deleterious |
| p.Glu69Thr | VUS               | -9.93  | Indeterminate | 0.4956   | Ambiguous  | -8.39  | Pathogenic | 0.33 | Neutral | 0.11 | Benign            | 0.22 | Tolerated   |       |             |
| p.Glu69Arg | VUS               | -1.75  | Neutral       | 0.3922   | Ambiguous  | -8.31  | Pathogenic | 0.24 | Neutral | 0.01 | Benign            | 0.18 | Tolerated   |       |             |
| p.Glu69Ser | VUS               | -13.93 | Indeterminate | 0.3272   | Benign     | -5.69  | Benign     | 0.33 | Neutral | 0.04 | Benign            | 0.51 | Tolerated   |       |             |
| p.Glu69Ile | VUS               | -3.57  | Neutral       | 0.7085   | Pathogenic | -11.52 | Pathogenic | 0.37 | Neutral | 0.09 | Benign            | 0.06 | Tolerated   |       |             |
| p.Glu69Met | VUS               | -30.66 | Indeterminate | 0.7565   | Pathogenic | -10.83 | Pathogenic | 0.38 | Neutral | 0.17 | Benign            | 0.04 | Deleterious |       |             |
| p.Glu69His | VUS               | -7.51  | Indeterminate | 0.5094   | Ambiguous  | -6.31  | Benign     | 0.30 | Neutral | 0.13 | Benign            | 0.09 | Tolerated   |       |             |
| p.Glu69Gln | VUS               | -6.51  | Indeterminate | 0.2181   | Benign     | -6.81  | Benign     | 0.19 | Neutral | 0.01 | Benign            | 0.25 | Tolerated   | 20.60 | Deleterious |
| p.Glu69Pro | VUS               | -53.15 | Deleterious   | 0.6727   | Pathogenic | -10.70 | Pathogenic | 0.40 | Neutral | 0.06 | Benign            | 0.13 | Tolerated   |       |             |
| p.Glu69Leu | VUS               | -33.22 | Indeterminate | 0.5672   | Pathogenic | -8.78  | Pathogenic | 0.35 | Neutral | 0.01 | Benign            | 0.1  | Tolerated   |       |             |
| p.Glu69Asp | VUS               | -5.22  | Neutral       | 0.0782   | Benign     | 0.95   | Benign     | 0.09 | Neutral | 0.00 | Benign            | 0.65 | Tolerated   | 5.42  | Neutral     |
| p.Glu69Ala | VUS               | -13.17 | Neutral       | 0.2904   | Benign     | -6.89  | Benign     | 0.27 | Neutral | 0.01 | Benign            | 0.28 | Tolerated   | 23.60 | Deleterious |
| p.Glu69Gly | VUS               | -13.03 | Indeterminate | 0.5256   | Ambiguous  | -8.23  | Pathogenic | 0.26 | Neutral | 0.36 | Benign            | 0.27 | Tolerated   | 24.00 | Deleterious |
| p.Glu69Val | VUS               | -25.39 | Indeterminate | 0.4395   | Ambiguous  | -9.19  | Pathogenic | 0.32 | Neutral | 0.01 | Benign            | 0.09 | Tolerated   | 24.10 | Deleterious |
| p.Glu69Tyr | VUS               | -8.93  | Indeterminate | 0.7874   | Pathogenic | -8.99  | Pathogenic | 0.36 | Neutral | 0.36 | Benign            | 0.04 | Deleterious |       |             |
| p.Glu69Cys | VUS               | -5.94  | Indeterminate | 0.8994   | Pathogenic | -7.55  | Pathogenic | 0.39 | Neutral | 1.00 | Probably damaging | 0.03 | Deleterious |       |             |
| p.Glu69Trp | VUS               | -19.38 | Indeterminate | 0.9321   | Pathogenic | -10.11 | Pathogenic | 0.40 | Neutral | 0.86 | Possibly damaging | 0.01 | Deleterious |       |             |
| p.Glu69Phe | VUS               | -11.30 | Indeterminate | 0.8778   | Pathogenic | -8.34  | Pathogenic | 0.38 | Neutral | 0.39 | Benign            | 0.03 | Deleterious |       |             |
| p.Pro70Asn | VUS               | -3.10  | Neutral       | 0.9617   | Pathogenic | -19.19 | Pathogenic | 0.66 | Disease | 1.00 | Probably damaging | 0.44 | Tolerated   |       |             |
| p.Pro70Lys | VUS               | -33.21 | Indeterminate | 0.8971</ |            |        |            |      |         |      |                   |      |             |       |             |

|            |                   |        |               |        |            |        |            |      |         |      |                   |      |             |       |             |
|------------|-------------------|--------|---------------|--------|------------|--------|------------|------|---------|------|-------------------|------|-------------|-------|-------------|
| p.Pro70Trp | VUS               | -53.15 | Deleterious   | 0.9728 | Pathogenic | -16.09 | Pathogenic | 0.64 | Disease | 1.00 | Probably damaging | 0.03 | Deleterious |       |             |
| p.Pro70Phe | VUS               | -0.11  | Neutral       | 0.9674 | Pathogenic | -15.59 | Pathogenic | 0.68 | Disease | 1.00 | Probably damaging | 0.08 | Tolerated   |       |             |
| p.Asn71Lys | VUS               | -53.15 | Deleterious   | 0.9616 | Pathogenic | -13.50 | Pathogenic | 0.76 | Disease | 1.00 | Probably damaging | 0.02 | Deleterious | 24.40 | Deleterious |
| p.Asn71Thr | VUS               | -53.15 | Deleterious   | 0.5918 | Pathogenic | -7.81  | Pathogenic | 0.69 | Disease | 0.98 | Probably damaging | 0.02 | Deleterious | 26.70 | Deleterious |
| p.Asn71Arg | VUS               | -53.15 | Deleterious   | 0.9005 | Pathogenic | -9.38  | Pathogenic | 0.69 | Disease | 1.00 | Probably damaging | 0.12 | Tolerated   |       |             |
| p.Asn71Ser | Likely pathogenic | -53.15 | Deleterious   | 0.2129 | Benign     | -6.58  | Benign     | 0.67 | Disease | 1.00 | Probably damaging | 0.04 | Deleterious | 25.30 | Deleterious |
| p.Asn71Ile | VUS               | -53.15 | Deleterious   | 0.9352 | Pathogenic | -11.05 | Pathogenic | 0.83 | Disease | 1.00 | Probably damaging | 0    | Deleterious | 28.10 | Deleterious |
| p.Asn71Met | VUS               | -53.15 | Deleterious   | 0.9288 | Pathogenic | -9.36  | Pathogenic | 0.77 | Disease | 1.00 | Probably damaging | 0    | Deleterious |       |             |
| p.Asn71His | VUS               | -20.64 | Indeterminate | 0.5902 | Pathogenic | -8.69  | Pathogenic | 0.75 | Disease | 1.00 | Probably damaging | 0.02 | Deleterious | 25.90 | Deleterious |
| p.Asn71Gln | VUS               | -13.47 | Indeterminate | 0.8669 | Pathogenic | -9.79  | Pathogenic | 0.67 | Disease | 1.00 | Probably damaging | 0.02 | Deleterious |       |             |
| p.Asn71Pro | VUS               | -53.15 | Deleterious   | 0.9656 | Pathogenic | -11.37 | Pathogenic | 0.73 | Disease | 1.00 | Probably damaging | 0.01 | Deleterious |       |             |
| p.Asn71Leu | VUS               | -53.15 | Deleterious   | 0.8076 | Pathogenic | -9.54  | Pathogenic | 0.74 | Disease | 1.00 | Probably damaging | 0    | Deleterious |       |             |
| p.Asn71Asp | VUS               | -26.26 | Indeterminate | 0.223  | Benign     | -2.53  | Benign     | 0.43 | Neutral | 1.00 | Probably damaging | 0.16 | Tolerated   | 24.00 | Deleterious |
| p.Asn71Glu | VUS               | -12.42 | Indeterminate | 0.7821 | Pathogenic | -6.87  | Benign     | 0.63 | Disease | 0.99 | Probably damaging | 0.02 | Deleterious |       |             |
| p.Asn71Ala | VUS               | -20.51 | Indeterminate | 0.7043 | Pathogenic | -6.89  | Benign     | 0.71 | Disease | 0.99 | Probably damaging | 0.02 | Deleterious |       |             |
| p.Asn71Gly | VUS               | -1.93  | Neutral       | 0.5961 | Pathogenic | -7.24  | Benign     | 0.67 | Disease | 1.00 | Probably damaging | 0.05 | Deleterious |       |             |
| p.Asn71Val | VUS               | -53.15 | Deleterious   | 0.8789 | Pathogenic | -9.19  | Pathogenic | 0.75 | Disease | 0.98 | Probably damaging | 0    | Deleterious |       |             |
| p.Asn71Tyr | VUS               | -53.15 | Deleterious   | 0.7956 | Pathogenic | -12.45 | Pathogenic | 0.82 | Disease | 1.00 | Probably damaging | 0.01 | Deleterious | 26.80 | Deleterious |
| p.Asn71Cys | VUS               | -16.50 | Indeterminate | 0.8283 | Pathogenic | -5.76  | Benign     | 0.73 | Disease | 1.00 | Probably damaging | 0    | Deleterious |       |             |
| p.Asn71Trp | VUS               | -53.15 | Deleterious   | 0.9803 | Pathogenic | -11.43 | Pathogenic | 0.77 | Disease | 1.00 | Probably damaging | 0    | Deleterious |       |             |
| p.Asn71Phe | VUS               | -53.15 | Deleterious   | 0.9648 | Pathogenic | -11.10 | Pathogenic | 0.76 | Disease | 1.00 | Probably damaging | 0    | Deleterious |       |             |
| p.Cys72Asn | VUS               | -5.60  | Neutral       | 0.4565 | Ambiguous  | -7.49  | Benign     | 0.43 | Neutral | 0.79 | Possibly damaging | 0.27 | Tolerated   |       |             |
| p.Cys72Lys | VUS               | -6.71  | Indeterminate | 0.7865 | Pathogenic | -9.86  | Pathogenic | 0.43 | Neutral | 0.67 | Possibly damaging | 0.51 | Tolerated   |       |             |
| p.Cys72Thr | VUS               | -3.40  | Neutral       | 0.256  | Benign     | -3.60  | Benign     | 0.25 | Neutral | 0.52 | Possibly damaging | 0.56 | Tolerated   |       |             |
| p.Cys72Arg | VUS               | -0.61  | Neutral       | 0.3115 | Benign     | -6.41  | Benign     | 0.11 | Neutral | 0.01 | Benign            | 0.3  | Tolerated   | 14.36 | Neutral     |
| p.Cys72Ser | VUS               | -8.34  | Indeterminate | 0.2006 | Benign     | -3.02  | Benign     | 0.35 | Neutral | 0.98 | Probably damaging | 0.41 | Tolerated   | 16.24 | Deleterious |
| p.Cys72Ile | VUS               | -7.24  | Indeterminate | 0.3465 | Ambiguous  | -6.65  | Benign     | 0.42 | Neutral | 0.97 | Probably damaging | 0.49 | Tolerated   |       |             |
| p.Cys72Met | VUS               | -3.24  | Neutral       | 0.5647 | Pathogenic | -6.74  | Benign     | 0.43 | Neutral | 0.99 | Probably damaging | 0.16 | Tolerated   |       |             |
| p.Cys72His | VUS               | -10.13 | Indeterminate | 0.3639 | Ambiguous  | -5.64  | Benign     | 0.42 | Neutral | 0.98 | Probably damaging | 0.17 | Tolerated   |       |             |
| p.Cys72Gln | VUS               | -12.58 | Indeterminate | 0.4744 | Ambiguous  | -5.57  | Benign     | 0.41 | Neutral | 0.84 | Possibly damaging | 0.38 | Tolerated   |       |             |
| p.Cys72Pro | VUS               | -7.71  | Indeterminate | 0.7099 | Pathogenic | -5.40  | Benign     | 0.43 | Neutral | 0.92 | Possibly damaging | 0.22 | Tolerated   |       |             |
| p.Cys72Leu | VUS               | -19.97 | Indeterminate | 0.2665 | Benign     | -4.26  | Benign     | 0.26 | Neutral | 0.80 | Possibly damaging | 0.55 | Tolerated   |       |             |
| p.Cys72Asp | VUS               | -1.91  | Neutral       | 0.4226 | Ambiguous  | -4.46  | Benign     | 0.46 | Neutral | 0.78 | Possibly damaging | 0.29 | Tolerated   |       |             |
| p.Cys72Glu | VUS               | -3.08  | Neutral       | 0.5005 | Ambiguous  | -3.91  | Benign     | 0.43 | Neutral | 0.84 | Possibly damaging | 0.48 | Tolerated   |       |             |
| p.Cys72Ala | VUS               | -4.81  | Neutral       | 0.1581 | Benign     | -0.64  | Benign     | 0.27 | Neutral | 0.97 | Probably damaging | 0.79 | Tolerated   |       |             |
| p.Cys72Gly | VUS               | -2.97  | Neutral       | 0.134  | Benign     | -3.04  | Benign     | 0.37 | Neutral | 0.99 | Probably damaging | 0.21 | Tolerated   | 15.02 | Deleterious |
| p.Cys72Val | VUS               | -5.23  | Neutral       | 0.2264 | Benign     | -3.23  | Benign     | 0.21 | Neutral | 0.75 | Possibly damaging | 1    | Tolerated   |       |             |
| p.Cys72Tyr | VUS               | -0.68  | Neutral       | 0.3384 | Benign     | -7.29  | Benign     | 0.19 | Neutral | 0.99 | Probably damaging | 0.23 | Tolerated   | 18.34 | Deleterious |
| p.Cys72Trp | VUS               | -11.02 | Indeterminate | 0.4589 | Ambiguous  | -8.48  | Pathogenic | 0.40 | Neutral | 1.00 | Probably damaging | 0.05 | Deleterious | 24.00 | Deleterious |
| p.Cys72Phe | VUS               | -8.51  | Indeterminate | 0.1717 | Benign     | -6.38  | Benign     | 0.37 | Neutral | 0.99 | Probably damaging | 0.2  | Tolerated   | 19.45 | Deleterious |
| p.Ala73Asn | VUS               | -7.83  | Indeterminate | 0.4928 | Ambiguous  | -12.71 | Pathogenic | 0.38 | Neutral | 0.50 | Possibly damaging | 0.3  | Tolerated   |       |             |
| p.Ala73Lys | VUS               | -2.90  | Neutral       | 0.6144 | Pathogenic | -15.55 | Pathogenic | 0.24 | Neutral | 0.82 | Possibly damaging | 0.65 | Tolerated   |       |             |
| p.Ala73Thr | VUS               | -0.56  | Neutral       | 0.132  | Benign     | -6.97  | Benign     | 0.17 | Neutral | 0.87 | Possibly damaging | 0.35 | Tolerated   | 23.20 | Deleterious |
| p.Ala73Arg | VUS               | -4.04  | Neutral       | 0.3606 | Ambiguous  | -9.84  | Pathogenic | 0.24 | Neutral | 0.97 | Probably damaging | 0.31 | Tolerated   |       |             |
| p.Ala73Ser | VUS               | -3.48  | Neutral       | 0.1403 | Benign     | -5.74  | Benign     | 0.30 | Neutral | 0.26 | Benign            | 0.44 | Tolerated   | 22.90 | Deleterious |
| p.Ala73Ile | VUS               | -1.38  | Neutral       | 0.3864 | Ambiguous  | -10.33 | Pathogenic | 0.39 | Neutral | 0.99 | Probably damaging | 0.11 | Tolerated   |       |             |
| p.Ala73Met | VUS               | -2.96  | Neutral       | 0.4562 | Ambiguous  | -10.25 | Pathogenic | 0.40 | Neutral | 1.00 | Probably damaging | 0.07 | Tolerated   |       |             |
| p.Ala73His | VUS               | -0.20  | Neutral       | 0.4991 | Ambiguous  | -10.25 | Pathogenic | 0.39 | Neutral | 1.00 | Probably damaging | 0.09 | Tolerated   |       |             |
| p.Ala73Gln | VUS               | -5.57  | Neutral       | 0.3172 | Benign     | -9.39  | Pathogenic | 0.21 | Neutral | 0.94 | Possibly damaging | 0.45 | Tolerated   |       |             |
| p.Ala73Pro | VUS               | -2.47  | Neutral       | 0.1182 | Benign     | -4.70  | Benign     | 0.16 | Neutral | 0.97 | Probably damaging | 0.23 | Tolerated   | 20.90 | Deleterious |
| p.Ala73Leu | VUS               | -1.54  | Neutral       | 0.2858 | Benign     | -7.24  | Benign     | 0.38 | Neutral | 0.90 | Possibly damaging | 0.18 | Tolerated   |       |             |
| p.Ala73Asp | VUS               | -5.39  | Neutral       | 0.3899 | Ambiguous  | -12.17 | Pathogenic | 0.40 | Neutral | 0.48 | Possibly damaging | 0.58 | Tolerated   | 21.90 | Deleterious |
| p.Ala73Glu | VUS               | -1.95  | Neutral       | 0.2439 | Benign     | -10.59 | Pathogenic | 0.16 | Neutral | 0.01 | Benign            | 1    | Tolerated   |       |             |
| p.Ala73Gly | VUS               | -2.99  | Neutral       | 0.1805 | Benign     | -6.60  | Benign     | 0.19 | Neutral | 0.72 | Possibly damaging | 0.24 | Tolerated   | 21.00 | Deleterious |
| p.Ala73Val | VUS               | -2.21  | Neutral       | 0.1819 | Benign     | -6.67  | Benign     | 0.20 | Neutral | 0.84 | Possibly damaging | 0.17 | Tolerated   | 17.40 | Deleterious |
| p.Ala73Tyr | VUS               | -4.06  | Neutral       | 0.6755 | Pathogenic | -12.54 | Pathogenic | 0.42 | Neutral | 1.00 | Probably damaging | 0.03 | Deleterious |       |             |
| p.Ala73Cys | VUS               | -2.99  | Neutral       | 0.4259 | Ambiguous  | -8.85  | Pathogenic | 0.36 | Neutral | 1.00 | Probably damaging | 0.03 | Deleterious |       |             |
| p.Ala73Trp | VUS               | -7.09  | Indeterminate | 0.7274 | Pathogenic | -11.99 | Pathogenic | 0.48 | Neutral | 1.00 | Probably damaging | 0.01 | Deleterious |       |             |
| p.Ala73Phe | VUS               | -3.00  | Neutral       | 0.5232 | Ambiguous  | -10.97 | Pathogenic | 0.39 | Neutral | 1.00 | Probably damaging | 0.03 | Deleterious |       |             |
| p.Asp74Asn | VUS               | -53.15 | Deleterious   | 0.8381 | Pathogenic | -9.62  | Pathogenic | 0.80 | Disease | 1.00 | Probably damaging | 0.17 | Tolerated   | 31.00 | Deleterious |
| p.Asp74Lys | VUS               | -53.15 | Deleterious   | 0.9891 | Pathogenic | -14.48 | Pathogenic | 0.80 | Disease | 1.00 | Probably damaging | 0.01 | Deleterious |       |             |
| p.Asp74Thr | VUS               | -53.15 | Deleterious   | 0.9723 | Pathogenic | -10.83 | Pathogenic | 0.79 | Disease | 1.00 | Probably damaging | 0.01 | Deleterious |       |             |
| p.Asp74Arg | VUS               | -53.15 | Deleterious   | 0.9747 | Pathogenic | -13.09 | Pathogenic | 0.80 | Disease | 1.00 | Probably damaging | 0.01 | Deleterious |       |             |
| p.Asp74Ser | VUS               | -12.50 | Indeterminate | 0.8258 | Pathogenic | -11.42 | Pathogenic | 0.74 | Disease | 1.00 | Probably damaging | 0.02 | Deleterious |       |             |
| p.Asp74Ile | VUS               | -53.15 | Deleterious   | 0.9679 | Pathogenic | -14.48 | Pathogenic | 0.80 | Disease | 1.00 | Probably damaging | 0    | Deleterious |       |             |
| p.Asp74Met | VUS               | -53.15 | Deleterious   | 0.9937 | Pathogenic | -15.23 | Pathogenic | 0.81 | Disease | 1.00 | Probably damaging | 0    | Deleterious |       |             |
| p.Asp74His | VUS               | -5.47  | Neutral       | 0.8861 | Pathogenic | -9.18  | Pathogenic | 0.90 | Disease | 1.00 | Probably damaging | 0.01 | Deleterious | 29.80 | Deleterious |
| p.Asp74Gln | VUS               | -53.15 | Deleterious   | 0.9741 | Pathogenic | -12.13 | Pathogenic | 0.79 | Disease | 1.00 | Probably damaging | 0.01 | Deleterious |       |             |
| p.Asp74Pro | VUS               | -53.15 | Deleterious   | 0.9834 | Pathogenic | -14.64 | Pathogenic | 0.75 | Disease | 0.98 | Probably damaging | 0.01 | Deleterious |       |             |
| p.Asp74Leu | VUS               | -53.15 | Deleterious   | 0.95   | Pathogenic | -13.73 | Pathogenic | 0.79 | Disease | 1.00 | Probably damaging | 0    | Deleterious |       |             |
| p.Asp74Glu | VUS               | 0.00   | Neutral       | 0.867  | Pathogenic | -7.60  | Pathogenic | 0.78 | Disease | 0.89 | Possibly damaging | 0.01 | Deleterious | 24.05 | Deleterious |
| p.Asp74Ala | VUS               | -53.15 | Deleterious   | 0.8943 | Pathogenic | -10.97 | Pathogenic | 0.85 | Disease | 1.00 | Probably damaging | 0.01 | Deleterious | 29.20 | Deleterious |
| p.Asp74Gly | VUS               | -53.15 | Deleterious   | 0.9501 | Pathogenic | -11.00 | Pathogenic | 0.88 | Disease | 1.00 | Probably damaging | 0.03 | Deleterious | 29.20 | Deleterious |
| p.Asp74Val | VUS               | -53.15 | Deleterious   | 0.9289 | Pathogenic | -12.81 | Pathogenic | 0.90 | Disease | 1.00 | Probably damaging | 0    | Deleterious | 29.00 | Deleterious |
| p.Asp74Tyr | VUS               | -53.15 | Deleterious   | 0.8956 | Pathogenic | -13.08 | Pathogenic | 0.90 | Disease | 1.00 | Probably damaging | 0    | Deleterious | 30.00 | Deleterious |
| p.Asp74Cys | VUS               | -0.01  | Neutral       | 0.929  | Pathogenic | -11.52 | Pathogenic | 0.79 | Disease | 1.00 | Probably damaging | 0    | Deleterious |       |             |
| p.Asp74Trp | VUS               | -53.15 | Deleterious   | 0.9936 | Pathogenic | -14.65 | Pathogenic | 0.81 | Disease | 1.00 | Probably damaging | 0    | Deleterious |       |             |
| p.Asp74Phe | VUS               | -53.15 | Deleterious   | 0.9831 | Pathogenic | -15.30 | Pathogenic | 0.82 | Disease | 1.00 | Probably damaging | 0    | Deleterious |       |             |
| p.Pro75Asn | VUS               | -2.21  | Neutral       | 0.6079 | Pathogenic | -11.44 | Pathogenic | 0.44 | Neutral | 1.00 | Probably damaging | 0.68 | Tolerated   |       |             |
| p.Pro75Lys | VUS               | -4.73  | Neutral       | 0.5067 | Ambiguous  | -10.14 | Pathogenic | 0.31 | Neutral | 1.00 | Probably damaging | 0.83 | Tolerated   |       |             |
| p.Pro75Thr | VUS               | -1.80  | Neutral       | 0.2037 | Benign     | -8.88  | Pathogenic | 0.40 | Neutral | 1.00 | Probably damaging | 0.53 | Tolerated   | 25.20 | Deleterious |
| p.Pro75Arg | VUS               | -0.73  | Neutral       | 0.249  | Benign     | -7.82  | Pathogenic | 0.23 | Neutral | 1.00 | Probably damaging | 0.64 | Tolerated   | 23.60 | Deleterious |
| p.Pro75Ser | VUS               | -1.67  | Neutral       | 0.2505 | Benign     | -7.87  | Pathogenic | 0.17 | Neutral | 1.00 | Probably damaging | 0.57 | Tolerated   | 24.00 | Deleterious |
| p.Pro75Ile | VUS               | -2.22  | Neutral       | 0.5196 | Ambiguous  | -12.88 | Pathogenic | 0.52 | Disease | 1.00 | Probably damaging | 0.14 | Tolerated   |       |             |
| p.Pro75Met | VUS               | -4.48  | Neutral       | 0.5736 | Pathogenic | -12.25 | Pathogenic | 0.48 | Neutral | 1.00 | Probably damaging | 0.08 | Tolerated   |       |             |
| p.Pro75His | VUS               | -0.31  | Neutral       | 0.3661 | Ambiguous  | -10.10 | Pathogenic | 0.43 | Neutral | 1.00 | Probably damaging | 0.13 | Tolerated   | 26.30 | Deleterious |
| p.Pro75Gln | VUS               | -3.70  | Neutral       | 0.3196 | Benign     | -9.25  | Pathogenic | 0.40 | Neutral | 1.00 | Probably damaging | 0.48 | Tolerated   |       |             |
| p.Pro75Leu | VUS               | -1.79  | Neutral       | 0.2612 | Benign     | -9.65  | Pathogenic | 0.30 | Neutral | 1.00 | Probably damaging | 0.24 | Tolerated   | 27.00 | Deleterious |
| p.Pro75Asp | VUS               | -1.93  | Neutral       | 0.5776 | Pathogenic | -10.89 | Pathogenic | 0.46 | Neutral | 1.00 | Probably damaging | 0.54 | Tolerated   |       |             |
| p.Pro75Glu | VUS               | -1.03  | Neutral       | 0.3748 | Ambiguous  | -10.34 | Pathogenic | 0.43 | Neutral | 1.00 | Probably damaging | 1    | Tolerated   |       |             |
| p.Pro75Ala | VUS               | -1.00  | Neutral       | 0.1356 | Benign     | -7.19  | Benign     | 0.28 | Neutral | 1.00 | Probably damaging | 0.55 | Tolerated   | 23.10 | Deleterious |
| p.Pro75Gly | VUS               | -1.33  | Neutral       | 0.4257 | Ambiguous  | -8.31  | Pathogenic | 0.30 | Neutral | 1.00 | Probably damaging | 0.33 | Tolerated   |       |             |
| p.Pro75Val | VUS               | -1.31  | Neutral       | 0.3043 | Benign     | -10.14 | Pathogenic | 0.44 | Neutral | 1.00 | Probably damaging | 0.21 | Tolerated   |       |             |
| p.Pro75Tyr | VUS               | -1.28  | Neutral       | 0.7005 | Pathogenic | -13.03 | Pathogenic | 0.47 | Neutral | 1.00 | Probably damaging | 0.07 | Tolerated   |       |             |
| p.Pro75Cys | VUS               | -1.58  | Neutral       | 0.7905 | Pathogenic | -11.33 | Pathogenic | 0.49 | Neutral | 1.00 |                   |      |             |       |             |

|            |     |        |               |        |            |        |            |      |         |      |                   |      |             |       |             |
|------------|-----|--------|---------------|--------|------------|--------|------------|------|---------|------|-------------------|------|-------------|-------|-------------|
| p.Ala76Val | VUS | -3.78  | Neutral       | 0.1339 | Benign     | -3.22  | Benign     | 0.16 | Neutral | 0.00 | Benign            | 0.17 | Tolerated   | 13.15 | Neutral     |
| p.Ala76Tyr | VUS | -3.09  | Neutral       | 0.4651 | Ambiguous  | -7.67  | Pathogenic | 0.35 | Neutral | 0.97 | Probably damaging | 0.03 | Deleterious |       |             |
| p.Ala76Cys | VUS | -14.50 | Indeterminate | 0.4836 | Ambiguous  | -5.99  | Benign     | 0.32 | Neutral | 0.99 | Probably damaging | 0.03 | Deleterious |       |             |
| p.Ala76Trp | VUS | -1.24  | Neutral       | 0.6791 | Pathogenic | -8.05  | Pathogenic | 0.37 | Neutral | 1.00 | Probably damaging | 0.01 | Deleterious |       |             |
| p.Ala76Phe | VUS | -6.82  | Indeterminate | 0.3737 | Ambiguous  | -8.80  | Pathogenic | 0.34 | Neutral | 0.93 | Possibly damaging | 0.03 | Deleterious |       |             |
| p.Thr77Asn | VUS | -4.52  | Neutral       | 0.4401 | Ambiguous  | -3.96  | Benign     | 0.53 | Disease | 1.00 | Probably damaging | 0.22 | Tolerated   | 25.80 | Deleterious |
| p.Thr77Lys | VUS | -4.40  | Neutral       | 0.6986 | Pathogenic | -9.95  | Pathogenic | 0.60 | Disease | 1.00 | Probably damaging | 0.15 | Tolerated   |       |             |
| p.Thr77Arg | VUS | -12.26 | Indeterminate | 0.5249 | Ambiguous  | -9.09  | Pathogenic | 0.57 | Disease | 1.00 | Probably damaging | 0.1  | Tolerated   |       |             |
| p.Thr77Ser | VUS | -6.48  | Indeterminate | 0.2652 | Benign     | -5.23  | Benign     | 0.28 | Neutral | 0.99 | Probably damaging | 1    | Tolerated   | 23.40 | Deleterious |
| p.Thr77Ile | VUS | -2.46  | Neutral       | 0.8141 | Pathogenic | -9.67  | Pathogenic | 0.57 | Disease | 1.00 | Probably damaging | 0.09 | Tolerated   | 26.80 | Deleterious |
| p.Thr77Met | VUS | -6.23  | Indeterminate | 0.3921 | Ambiguous  | -9.21  | Pathogenic | 0.57 | Disease | 1.00 | Probably damaging | 0.05 | Deleterious |       |             |
| p.Thr77His | VUS | -4.95  | Neutral       | 0.5887 | Pathogenic | -6.65  | Benign     | 0.57 | Disease | 1.00 | Probably damaging | 0.05 | Deleterious |       |             |
| p.Thr77Gln | VUS | -5.14  | Neutral       | 0.6083 | Pathogenic | -8.48  | Pathogenic | 0.55 | Disease | 1.00 | Probably damaging | 0.11 | Tolerated   |       |             |
| p.Thr77Pro | VUS | -33.22 | Indeterminate | 0.5    | Ambiguous  | -12.09 | Pathogenic | 0.35 | Neutral | 1.00 | Probably damaging | 0.19 | Tolerated   | 26.00 | Deleterious |
| p.Thr77Leu | VUS | -5.03  | Neutral       | 0.3219 | Benign     | -8.76  | Pathogenic | 0.56 | Disease | 0.99 | Probably damaging | 0.13 | Tolerated   |       |             |
| p.Thr77Asp | VUS | -7.25  | Indeterminate | 0.7915 | Pathogenic | -5.72  | Benign     | 0.57 | Disease | 1.00 | Probably damaging | 0.15 | Tolerated   |       |             |
| p.Thr77Glu | VUS | -16.56 | Indeterminate | 0.7672 | Pathogenic | -7.61  | Pathogenic | 0.56 | Disease | 1.00 | Probably damaging | 0.12 | Tolerated   |       |             |
| p.Thr77Ala | VUS | -6.61  | Indeterminate | 0.276  | Benign     | -6.63  | Benign     | 0.51 | Disease | 0.98 | Probably damaging | 0.56 | Tolerated   | 23.30 | Deleterious |
| p.Thr77Gly | VUS | -1.41  | Neutral       | 0.3456 | Ambiguous  | -7.91  | Pathogenic | 0.55 | Disease | 1.00 | Probably damaging | 0.3  | Tolerated   |       |             |
| p.Thr77Val | VUS | -8.27  | Indeterminate | 0.5823 | Pathogenic | -9.17  | Pathogenic | 0.48 | Neutral | 0.99 | Probably damaging | 0.16 | Tolerated   |       |             |
| p.Thr77Tyr | VUS | -2.86  | Neutral       | 0.7131 | Pathogenic | -9.02  | Pathogenic | 0.59 | Disease | 1.00 | Probably damaging | 0.06 | Tolerated   |       |             |
| p.Thr77Cys | VUS | -2.08  | Neutral       | 0.7422 | Pathogenic | -7.94  | Pathogenic | 0.58 | Disease | 1.00 | Probably damaging | 0.08 | Tolerated   |       |             |
| p.Thr77Trp | VUS | -3.70  | Neutral       | 0.8587 | Pathogenic | -11.81 | Pathogenic | 0.59 | Disease | 1.00 | Probably damaging | 0.02 | Deleterious |       |             |
| p.Thr77Phe | VUS | -3.56  | Neutral       | 0.7102 | Pathogenic | -10.34 | Pathogenic | 0.58 | Disease | 1.00 | Probably damaging | 0.05 | Deleterious |       |             |
| p.Leu78Asn | VUS | 0.00   | Neutral       | 0.3776 | Ambiguous  | -8.32  | Pathogenic | 0.47 | Neutral | 1.00 | Probably damaging | 0.09 | Tolerated   |       |             |
| p.Leu78Lys | VUS | -0.10  | Neutral       | 0.2747 | Benign     | -7.82  | Pathogenic | 0.47 | Neutral | 0.99 | Probably damaging | 0.1  | Tolerated   |       |             |
| p.Leu78Thr | VUS | -0.22  | Neutral       | 0.3528 | Ambiguous  | -8.99  | Pathogenic | 0.45 | Neutral | 1.00 | Probably damaging | 0.14 | Tolerated   |       |             |
| p.Leu78Arg | VUS | -16.95 | Indeterminate | 0.1211 | Benign     | -4.66  | Benign     | 0.50 | Neutral | 1.00 | Probably damaging | 0.11 | Tolerated   | 27.00 | Deleterious |
| p.Leu78Ser | VUS | 0.00   | Neutral       | 0.3317 | Benign     | -5.84  | Benign     | 0.42 | Neutral | 1.00 | Probably damaging | 0.13 | Tolerated   |       |             |
| p.Leu78Ile | VUS | -0.32  | Neutral       | 0.3375 | Benign     | -13.34 | Pathogenic | 0.34 | Neutral | 1.00 | Probably damaging | 0.38 | Tolerated   | 18.47 | Deleterious |
| p.Leu78Met | VUS | -11.97 | Indeterminate | 0.1891 | Benign     | -7.19  | Benign     | 0.36 | Neutral | 1.00 | Probably damaging | 0.23 | Tolerated   |       |             |
| p.Leu78His | VUS | -1.17  | Neutral       | 0.2993 | Benign     | -6.42  | Benign     | 0.44 | Neutral | 1.00 | Probably damaging | 0.15 | Tolerated   | 27.00 | Deleterious |
| p.Leu78Gln | VUS | -5.66  | Neutral       | 0.1461 | Benign     | -6.01  | Benign     | 0.45 | Neutral | 1.00 | Probably damaging | 0.1  | Tolerated   |       |             |
| p.Leu78Pro | VUS | -10.97 | Indeterminate | 0.4528 | Ambiguous  | -11.56 | Pathogenic | 0.52 | Disease | 1.00 | Probably damaging | 0.08 | Tolerated   | 27.50 | Deleterious |
| p.Leu78Asp | VUS | 0.00   | Neutral       | 0.606  | Pathogenic | -9.01  | Pathogenic | 0.49 | Neutral | 1.00 | Probably damaging | 0.06 | Tolerated   |       |             |
| p.Leu78Glu | VUS | -5.41  | Neutral       | 0.3396 | Benign     | -8.87  | Pathogenic | 0.48 | Neutral | 1.00 | Probably damaging | 0.09 | Tolerated   |       |             |
| p.Leu78Ala | VUS | -14.32 | Indeterminate | 0.2132 | Benign     | -5.39  | Benign     | 0.40 | Neutral | 1.00 | Probably damaging | 0.21 | Tolerated   |       |             |
| p.Leu78Gly | VUS | 0.00   | Neutral       | 0.1888 | Benign     | -1.07  | Benign     | 0.21 | Neutral | 1.00 | Probably damaging | 0.11 | Tolerated   |       |             |
| p.Leu78Val | VUS | -0.08  | Neutral       | 0.1929 | Benign     | -9.48  | Pathogenic | 0.34 | Neutral | 0.99 | Probably damaging | 0.3  | Tolerated   | 18.18 | Deleterious |
| p.Leu78Tyr | VUS | -3.31  | Neutral       | 0.3986 | Ambiguous  | -10.11 | Pathogenic | 0.40 | Neutral | 0.99 | Probably damaging | 0.52 | Tolerated   |       |             |
| p.Leu78Cys | VUS | -2.33  | Neutral       | 0.5088 | Ambiguous  | -5.35  | Benign     | 0.41 | Neutral | 1.00 | Probably damaging | 0.07 | Tolerated   |       |             |
| p.Leu78Trp | VUS | -0.17  | Neutral       | 0.3248 | Benign     | -10.06 | Pathogenic | 0.42 | Neutral | 1.00 | Probably damaging | 0.13 | Tolerated   |       |             |
| p.Leu78Phe | VUS | -0.03  | Neutral       | 0.2207 | Benign     | -9.28  | Pathogenic | 0.23 | Neutral | 1.00 | Probably damaging | 0.61 | Tolerated   | 19.60 | Deleterious |
| p.Thr79Asn | VUS | -0.32  | Neutral       | 0.5472 | Ambiguous  | -10.60 | Pathogenic | 0.38 | Neutral | 0.93 | Possibly damaging | 0.04 | Deleterious | 25.30 | Deleterious |
| p.Thr79Lys | VUS | -2.10  | Neutral       | 0.773  | Pathogenic | -13.86 | Pathogenic | 0.39 | Neutral | 0.85 | Possibly damaging | 0.02 | Deleterious |       |             |
| p.Thr79Arg | VUS | -12.64 | Indeterminate | 0.5924 | Pathogenic | -10.01 | Pathogenic | 0.41 | Neutral | 0.98 | Probably damaging | 0.02 | Deleterious |       |             |
| p.Thr79Ser | VUS | -0.66  | Neutral       | 0.2456 | Benign     | -3.94  | Benign     | 0.12 | Neutral | 0.06 | Benign            | 0.38 | Tolerated   | 20.74 | Deleterious |
| p.Thr79Ile | VUS | -0.34  | Neutral       | 0.8117 | Pathogenic | -6.63  | Benign     | 0.17 | Neutral | 0.94 | Possibly damaging | 0.02 | Deleterious | 26.40 | Deleterious |
| p.Thr79Met | VUS | -1.24  | Neutral       | 0.5079 | Ambiguous  | -7.08  | Benign     | 0.36 | Neutral | 1.00 | Probably damaging | 0.01 | Deleterious |       |             |
| p.Thr79His | VUS | -1.61  | Neutral       | 0.6363 | Pathogenic | -11.02 | Pathogenic | 0.40 | Neutral | 1.00 | Probably damaging | 0.01 | Deleterious |       |             |
| p.Thr79Gln | VUS | -0.84  | Neutral       | 0.5363 | Ambiguous  | -8.94  | Pathogenic | 0.39 | Neutral | 0.95 | Possibly damaging | 0.02 | Deleterious |       |             |
| p.Thr79Pro | VUS | -53.15 | Deleterious   | 0.6573 | Pathogenic | -11.22 | Pathogenic | 0.34 | Neutral | 1.00 | Probably damaging | 0.03 | Deleterious | 24.80 | Deleterious |
| p.Thr79Leu | VUS | -4.80  | Neutral       | 0.48   | Ambiguous  | -5.73  | Benign     | 0.40 | Neutral | 0.85 | Possibly damaging | 0.02 | Deleterious |       |             |
| p.Thr79Asp | VUS | -3.25  | Neutral       | 0.8238 | Pathogenic | -11.56 | Pathogenic | 0.41 | Neutral | 0.95 | Possibly damaging | 0.02 | Deleterious |       |             |
| p.Thr79Glu | VUS | -1.74  | Neutral       | 0.7004 | Pathogenic | -10.32 | Pathogenic | 0.41 | Neutral | 0.81 | Possibly damaging | 0.02 | Deleterious |       |             |
| p.Thr79Ala | VUS | -1.95  | Neutral       | 0.3031 | Benign     | -4.35  | Benign     | 0.09 | Neutral | 0.01 | Benign            | 0.16 | Tolerated   | 19.41 | Deleterious |
| p.Thr79Gly | VUS | -2.54  | Neutral       | 0.4236 | Ambiguous  | -8.45  | Pathogenic | 0.38 | Neutral | 1.00 | Probably damaging | 0.03 | Deleterious |       |             |
| p.Thr79Val | VUS | -1.05  | Neutral       | 0.5979 | Pathogenic | -3.11  | Benign     | 0.28 | Neutral | 0.67 | Possibly damaging | 0.03 | Deleterious |       |             |
| p.Thr79Tyr | VUS | -4.54  | Neutral       | 0.8001 | Pathogenic | -9.48  | Pathogenic | 0.42 | Neutral | 1.00 | Probably damaging | 0.01 | Deleterious |       |             |
| p.Thr79Cys | VUS | -3.24  | Neutral       | 0.7324 | Pathogenic | -6.03  | Benign     | 0.23 | Neutral | 1.00 | Probably damaging | 0.01 | Deleterious |       |             |
| p.Thr79Trp | VUS | -5.36  | Neutral       | 0.8715 | Pathogenic | -7.97  | Pathogenic | 0.42 | Neutral | 1.00 | Probably damaging | 0    | Deleterious |       |             |
| p.Thr79Phe | VUS | -1.91  | Neutral       | 0.8125 | Pathogenic | -8.81  | Pathogenic | 0.23 | Neutral | 0.99 | Probably damaging | 0.09 | Tolerated   |       |             |
| p.Arg80Asn | VUS | -17.84 | Indeterminate | 0.8009 | Pathogenic | -13.18 | Pathogenic | 0.46 | Neutral | 1.00 | Probably damaging | 0.47 | Tolerated   |       |             |
| p.Arg80Lys | VUS | -4.55  | Neutral       | 0.4406 | Ambiguous  | -11.68 | Pathogenic | 0.32 | Neutral | 0.99 | Probably damaging | 0.9  | Tolerated   |       |             |
| p.Arg80Thr | VUS | -10.86 | Indeterminate | 0.4117 | Ambiguous  | -4.45  | Benign     | 0.16 | Neutral | 1.00 | Probably damaging | 0.82 | Tolerated   |       |             |
| p.Arg80Ser | VUS | -3.31  | Neutral       | 0.6392 | Pathogenic | -6.99  | Benign     | 0.13 | Neutral | 1.00 | Probably damaging | 0.93 | Tolerated   |       |             |
| p.Arg80Ile | VUS | -53.15 | Deleterious   | 0.5159 | Ambiguous  | -12.71 | Pathogenic | 0.48 | Neutral | 1.00 | Probably damaging | 0.24 | Tolerated   |       |             |
| p.Arg80Met | VUS | -12.61 | Indeterminate | 0.5624 | Ambiguous  | -9.13  | Pathogenic | 0.47 | Neutral | 0.99 | Probably damaging | 0.13 | Tolerated   |       |             |
| p.Arg80His | VUS | -7.91  | Indeterminate | 0.2263 | Benign     | -7.35  | Benign     | 0.15 | Neutral | 1.00 | Probably damaging | 0.18 | Tolerated   |       |             |
| p.Arg80Gln | VUS | -17.50 | Indeterminate | 0.2243 | Benign     | -7.28  | Benign     | 0.14 | Neutral | 1.00 | Probably damaging | 0.54 | Tolerated   | 22.70 | Deleterious |
| p.Arg80Pro | VUS | -53.15 | Deleterious   | 0.8603 | Pathogenic | -9.74  | Pathogenic | 0.23 | Neutral | 1.00 | Probably damaging | 0.31 | Tolerated   | 24.50 | Deleterious |
| p.Arg80Leu | VUS | -10.61 | Indeterminate | 0.2514 | Benign     | -7.89  | Pathogenic | 0.14 | Neutral | 0.87 | Possibly damaging | 0.4  | Tolerated   | 22.30 | Deleterious |
| p.Arg80Asp | VUS | -15.11 | Indeterminate | 0.9354 | Pathogenic | -15.84 | Pathogenic | 0.50 | Neutral | 1.00 | Probably damaging | 0.51 | Tolerated   |       |             |
| p.Arg80Glu | VUS | -4.74  | Neutral       | 0.6812 | Pathogenic | -13.85 | Pathogenic | 0.47 | Neutral | 1.00 | Probably damaging | 0.81 | Tolerated   |       |             |
| p.Arg80Ala | VUS | -6.72  | Indeterminate | 0.5359 | Ambiguous  | -7.56  | Pathogenic | 0.27 | Neutral | 1.00 | Probably damaging | 1    | Tolerated   |       |             |
| p.Arg80Gly | VUS | -7.39  | Indeterminate | 0.5276 | Ambiguous  | -9.90  | Pathogenic | 0.42 | Neutral | 1.00 | Probably damaging | 0.43 | Tolerated   | 24.50 | Deleterious |
| p.Arg80Val | VUS | -20.05 | Indeterminate | 0.4465 | Ambiguous  | -10.29 | Pathogenic | 0.49 | Neutral | 1.00 | Probably damaging | 0.38 | Tolerated   |       |             |
| p.Arg80Tyr | VUS | -9.69  | Indeterminate | 0.4691 | Ambiguous  | -6.99  | Benign     | 0.42 | Neutral | 0.99 | Probably damaging | 0.16 | Tolerated   |       |             |
| p.Arg80Cys | VUS | -2.00  | Neutral       | 0.2644 | Benign     | -8.00  | Pathogenic | 0.48 | Neutral | 1.00 | Probably damaging | 0.09 | Tolerated   |       |             |
| p.Arg80Trp | VUS | -9.72  | Indeterminate | 0.2873 | Benign     | -9.49  | Pathogenic | 0.46 | Neutral | 1.00 | Probably damaging | 0.04 | Deleterious |       |             |
| p.Arg80Phe | VUS | -14.98 | Indeterminate | 0.6496 | Pathogenic | -7.79  | Pathogenic | 0.34 | Neutral | 0.96 | Possibly damaging | 0.14 | Tolerated   |       |             |
| p.Pro81Asn | VUS | -53.15 | Deleterious   | 0.9894 | Pathogenic | -18.84 | Pathogenic | 0.82 | Disease | 1.00 | Probably damaging | 0.02 | Deleterious |       |             |
| p.Pro81Lys | VUS | -53.15 | Deleterious   | 0.9967 | Pathogenic | -21.45 | Pathogenic | 0.85 | Disease | 1.00 | Probably damaging | 0.03 | Deleterious |       |             |
| p.Pro81Thr | VUS | -33.22 | Indeterminate | 0.8388 | Pathogenic | -13.29 | Pathogenic | 0.85 | Disease | 1.00 | Probably damaging | 0.07 | Tolerated   | 27.80 | Deleterious |
| p.Pro81Arg | VUS | -53.15 | Deleterious   | 0.9753 | Pathogenic | -17.08 | Pathogenic | 0.93 | Disease | 1.00 | Probably damaging | 0.02 | Deleterious | 29.10 | Deleterious |
| p.Pro81Ser | VUS | -53.15 | Deleterious   | 0.8599 | Pathogenic | -12.55 | Pathogenic | 0.82 | Disease | 1.00 | Probably damaging | 0.07 | Tolerated   | 29.00 | Deleterious |
| p.Pro81Ile | VUS | -53.15 | Deleterious   | 0.9406 | Pathogenic | -18.39 | Pathogenic | 0.81 | Disease | 1.00 | Probably damaging | 0.07 | Tolerated   |       |             |
| p.Pro81Met | VUS | -53.15 | Deleterious   | 0.9665 | Pathogenic | -15.36 | Pathogenic | 0.83 | Disease | 1.00 | Probably damaging | 0.02 | Deleterious |       |             |
| p.Pro81His | VUS | -53.15 | Deleterious   | 0.9778 | Pathogenic | -18.01 | Pathogenic | 0.87 | Disease | 1.00 | Probably damaging | 0.01 | Deleterious | 29.60 | Deleterious |
| p.Pro81Gln | VUS | -53.15 | Deleterious   | 0.9612 | Pathogenic | -16.67 | Pathogenic | 0.82 | Disease | 1.00 | Probably damaging | 0.02 | Deleterious |       |             |
| p.Pro81Leu | VUS | -53.15 | Deleterious   | 0.8411 | Pathogenic | -14.01 | Pathogenic | 0.90 | Disease | 1.00 | Probably damaging | 0.07 | Tolerated   | 31.00 | Deleterious |
| p.Pro81Asp | VUS | -53.15 | Deleterious   | 0.994  | Pathogenic | -19.16 | Pathogenic | 0.85 | Disease | 1.00 | Probably damaging | 0.02 | Deleterious |       |             |
| p.Pro81Glu | VUS | -53.15 | Deleterious   | 0.9834 | Pathogenic | -17.89 | Pathogenic | 0.81 | Disease | 1.00 | Probably damaging | 0.03 | Deleterious |       |             |
| p.Pro81Ala | VUS | -20.08 | Indeterminate | 0.4524 | Ambiguous  | -10.68 | Pathogenic | 0.71 | Disease | 1.00 | Probably damaging | 0.17 | Tolerated   | 27.00 | Deleterious |
| p.Pro81Gly | VUS | -53.15 | Deleterious   | 0.9254 | Pathogenic | -15.73 | Pathogenic | 0.77 | Disease | 1.00 | Probably damaging | 0.07 | Tolerated   |       |             |
| p.Pro81Val | VUS | -33.22 | Indeterminate |        |            |        |            |      |         |      |                   |      |             |       |             |

|            |                   |        |               |        |            |        |            |      |         |      |                   |      |             |       |             |
|------------|-------------------|--------|---------------|--------|------------|--------|------------|------|---------|------|-------------------|------|-------------|-------|-------------|
| p.Val82Asp | VUS               | -53.15 | Deleterious   | 0.9883 | Pathogenic | -16.64 | Pathogenic | 0.79 | Disease | 1.00 | Probably damaging | 0    | Deleterious |       |             |
| p.Val82Glu | VUS               | -33.21 | Indeterminate | 0.9406 | Pathogenic | -13.40 | Pathogenic | 0.80 | Disease | 1.00 | Probably damaging | 0.01 | Deleterious | 27.70 | Deleterious |
| p.Val82Ala | VUS               | -2.05  | Neutral       | 0.3786 | Ambiguous  | -1.31  | Benign     | 0.82 | Neutral | 0.87 | Possibly damaging | 0.1  | Tolerated   | 22.80 | Deleterious |
| p.Val82Gly | VUS               | -33.22 | Indeterminate | 0.6991 | Pathogenic | -9.38  | Pathogenic | 0.55 | Disease | 1.00 | Probably damaging | 0    | Deleterious | 26.80 | Deleterious |
| p.Val82Tyr | VUS               | -53.15 | Deleterious   | 0.9744 | Pathogenic | -15.76 | Pathogenic | 0.67 | Disease | 1.00 | Probably damaging | 0.01 | Deleterious |       |             |
| p.Val82Cys | VUS               | -13.90 | Indeterminate | 0.8291 | Pathogenic | -10.10 | Pathogenic | 0.64 | Disease | 1.00 | Probably damaging | 0.01 | Deleterious |       |             |
| p.Val82Trp | VUS               | -53.15 | Deleterious   | 0.9889 | Pathogenic | -14.31 | Pathogenic | 0.64 | Disease | 1.00 | Probably damaging | 0    | Deleterious |       |             |
| p.Val82Phe | VUS               | -21.29 | Indeterminate | 0.7499 | Pathogenic | -13.04 | Pathogenic | 0.64 | Disease | 1.00 | Probably damaging | 0.02 | Deleterious |       |             |
| p.His83Asn | VUS               | -53.15 | Deleterious   | 0.7844 | Pathogenic | -16.37 | Pathogenic | 0.91 | Disease | 1.00 | Probably damaging | 0    | Deleterious | 29.40 | Deleterious |
| p.His83Lys | VUS               | -53.15 | Deleterious   | 0.9871 | Pathogenic | -18.73 | Pathogenic | 0.84 | Disease | 0.97 | Probably damaging | 0    | Deleterious |       |             |
| p.His83Thr | VUS               | -53.15 | Deleterious   | 0.96   | Pathogenic | -15.15 | Pathogenic | 0.84 | Disease | 1.00 | Probably damaging | 0    | Deleterious |       |             |
| p.His83Arg | Pathogenic        | -53.15 | Deleterious   | 0.9431 | Pathogenic | -14.58 | Pathogenic | 0.90 | Disease | 0.96 | Probably damaging | 0    | Deleterious | 27.10 | Deleterious |
| p.His83Ser | VUS               | -53.15 | Deleterious   | 0.9106 | Pathogenic | -15.71 | Pathogenic | 0.83 | Disease | 1.00 | Probably damaging | 0    | Deleterious |       |             |
| p.His83Ile | VUS               | -53.15 | Deleterious   | 0.9602 | Pathogenic | -14.15 | Pathogenic | 0.87 | Disease | 0.99 | Probably damaging | 0    | Deleterious |       |             |
| p.His83Met | VUS               | -30.49 | Indeterminate | 0.9481 | Pathogenic | -12.73 | Pathogenic | 0.87 | Disease | 1.00 | Probably damaging | 0    | Deleterious |       |             |
| p.His83Gln | VUS               | -53.15 | Deleterious   | 0.8794 | Pathogenic | -10.99 | Pathogenic | 0.88 | Disease | 1.00 | Probably damaging | 0    | Deleterious | 25.70 | Deleterious |
| p.His83Pro | VUS               | -53.15 | Deleterious   | 0.8982 | Pathogenic | -12.25 | Pathogenic | 0.90 | Disease | 1.00 | Probably damaging | 0    | Deleterious | 28.50 | Deleterious |
| p.His83Leu | VUS               | -53.15 | Deleterious   | 0.8031 | Pathogenic | -12.52 | Pathogenic | 0.90 | Disease | 0.99 | Probably damaging | 0    | Deleterious | 29.40 | Deleterious |
| p.His83Asp | Likely pathogenic | -53.15 | Deleterious   | 0.8932 | Pathogenic | -14.15 | Pathogenic | 0.90 | Disease | 1.00 | Probably damaging | 0    | Deleterious | 29.80 | Deleterious |
| p.His83Glu | VUS               | -53.15 | Deleterious   | 0.937  | Pathogenic | -13.40 | Pathogenic | 0.84 | Disease | 1.00 | Probably damaging | 0    | Deleterious |       |             |
| p.His83Ala | VUS               | -33.22 | Indeterminate | 0.9429 | Pathogenic | -12.39 | Pathogenic | 0.82 | Disease | 1.00 | Probably damaging | 0    | Deleterious |       |             |
| p.His83Gly | VUS               | -53.15 | Deleterious   | 0.9562 | Pathogenic | -14.62 | Pathogenic | 0.83 | Disease | 1.00 | Probably damaging | 0    | Deleterious |       |             |
| p.His83Val | VUS               | -53.15 | Deleterious   | 0.9547 | Pathogenic | -13.93 | Pathogenic | 0.87 | Disease | 1.00 | Probably damaging | 0    | Deleterious |       |             |
| p.His83Tyr | Likely pathogenic | -53.15 | Deleterious   | 0.7859 | Pathogenic | -14.36 | Pathogenic | 0.90 | Disease | 0.97 | Probably damaging | 0    | Deleterious | 29.40 | Deleterious |
| p.His83Cys | VUS               | -53.15 | Deleterious   | 0.7785 | Pathogenic | -14.26 | Pathogenic | 0.82 | Disease | 1.00 | Probably damaging | 0    | Deleterious |       |             |
| p.His83Trp | VUS               | -53.15 | Deleterious   | 0.8026 | Pathogenic | -16.77 | Pathogenic | 0.86 | Disease | 1.00 | Probably damaging | 0    | Deleterious |       |             |
| p.His83Phe | VUS               | -53.15 | Deleterious   | 0.8484 | Pathogenic | -14.90 | Pathogenic | 0.86 | Disease | 0.99 | Probably damaging | 0    | Deleterious |       |             |
| p.Asp84Asn | Likely pathogenic | -53.15 | Deleterious   | 0.8357 | Pathogenic | -11.47 | Pathogenic | 0.71 | Disease | 1.00 | Probably damaging | 0.52 | Tolerated   | 32.00 | Deleterious |
| p.Asp84Lys | VUS               | -53.15 | Deleterious   | 0.9685 | Pathogenic | -16.42 | Pathogenic | 0.78 | Disease | 1.00 | Probably damaging | 0.45 | Tolerated   |       |             |
| p.Asp84Thr | VUS               | -53.15 | Deleterious   | 0.9381 | Pathogenic | -12.78 | Pathogenic | 0.77 | Disease | 1.00 | Probably damaging | 0.36 | Tolerated   |       |             |
| p.Asp84Arg | VUS               | -53.15 | Deleterious   | 0.9309 | Pathogenic | -15.98 | Pathogenic | 0.77 | Disease | 1.00 | Probably damaging | 0.34 | Tolerated   |       |             |
| p.Asp84Ser | VUS               | -53.15 | Deleterious   | 0.8767 | Pathogenic | -11.88 | Pathogenic | 0.69 | Disease | 1.00 | Probably damaging | 0.55 | Tolerated   |       |             |
| p.Asp84Ile | VUS               | -53.15 | Deleterious   | 0.9329 | Pathogenic | -15.86 | Pathogenic | 0.78 | Disease | 1.00 | Probably damaging | 0.17 | Tolerated   |       |             |
| p.Asp84Met | VUS               | -53.15 | Deleterious   | 0.9818 | Pathogenic | -15.99 | Pathogenic | 0.77 | Disease | 1.00 | Probably damaging | 0.1  | Tolerated   |       |             |
| p.Asp84His | VUS               | -53.15 | Deleterious   | 0.8323 | Pathogenic | -12.46 | Pathogenic | 0.84 | Disease | 1.00 | Probably damaging | 0.24 | Tolerated   | 32.00 | Deleterious |
| p.Asp84Gln | VUS               | -53.15 | Deleterious   | 0.9182 | Pathogenic | -14.08 | Pathogenic | 0.67 | Disease | 1.00 | Probably damaging | 0.36 | Tolerated   |       |             |
| p.Asp84Pro | VUS               | -53.15 | Deleterious   | 0.9957 | Pathogenic | -18.92 | Pathogenic | 0.77 | Disease | 0.99 | Probably damaging | 0.26 | Tolerated   |       |             |
| p.Asp84Leu | VUS               | -53.15 | Deleterious   | 0.8899 | Pathogenic | -15.56 | Pathogenic | 0.78 | Disease | 1.00 | Probably damaging | 0.29 | Tolerated   |       |             |
| p.Asp84Glu | VUS               | -11.57 | Indeterminate | 0.7934 | Pathogenic | -9.49  | Pathogenic | 0.69 | Disease | 0.98 | Probably damaging | 0.78 | Tolerated   | 27.30 | Deleterious |
| p.Asp84Ala | VUS               | -53.15 | Deleterious   | 0.8398 | Pathogenic | -11.92 | Pathogenic | 0.83 | Disease | 1.00 | Probably damaging | 0.73 | Tolerated   | 31.00 | Deleterious |
| p.Asp84Gly | VUS               | -53.15 | Deleterious   | 0.9245 | Pathogenic | -12.25 | Pathogenic | 0.82 | Disease | 1.00 | Probably damaging | 0.5  | Tolerated   | 32.00 | Deleterious |
| p.Asp84Val | VUS               | -53.15 | Deleterious   | 0.8435 | Pathogenic | -13.70 | Pathogenic | 0.84 | Disease | 1.00 | Probably damaging | 0.26 | Tolerated   | 31.00 | Deleterious |
| p.Asp84Tyr | VUS               | -53.15 | Deleterious   | 0.7537 | Pathogenic | -13.75 | Pathogenic | 0.84 | Disease | 1.00 | Probably damaging | 0.31 | Tolerated   | 32.00 | Deleterious |
| p.Asp84Cys | VUS               | -53.15 | Deleterious   | 0.9561 | Pathogenic | -14.29 | Pathogenic | 0.78 | Disease | 1.00 | Probably damaging | 0.09 | Tolerated   |       |             |
| p.Asp84Trp | VUS               | -53.15 | Deleterious   | 0.9764 | Pathogenic | -15.31 | Pathogenic | 0.78 | Disease | 1.00 | Probably damaging | 0.06 | Tolerated   |       |             |
| p.Asp84Phe | VUS               | -53.15 | Deleterious   | 0.9455 | Pathogenic | -14.89 | Pathogenic | 0.79 | Disease | 1.00 | Probably damaging | 0.28 | Tolerated   |       |             |
| p.Ala85Asn | VUS               | -18.26 | Indeterminate | 0.9879 | Pathogenic | -15.33 | Pathogenic | 0.79 | Disease | 1.00 | Probably damaging | 0    | Deleterious |       |             |
| p.Ala85Lys | VUS               | -33.22 | Indeterminate | 0.9973 | Pathogenic | -17.93 | Pathogenic | 0.83 | Disease | 1.00 | Probably damaging | 0    | Deleterious |       |             |
| p.Ala85Thr | VUS               | -17.82 | Indeterminate | 0.6836 | Pathogenic | -7.99  | Pathogenic | 0.83 | Disease | 1.00 | Probably damaging | 0    | Deleterious | 32.00 | Deleterious |
| p.Ala85Arg | VUS               | -33.22 | Indeterminate | 0.978  | Pathogenic | -14.78 | Pathogenic | 0.82 | Disease | 1.00 | Probably damaging | 0    | Deleterious |       |             |
| p.Ala85Ser | VUS               | -3.75  | Neutral       | 0.4337 | Ambiguous  | -9.74  | Pathogenic | 0.70 | Disease | 0.99 | Probably damaging | 0    | Deleterious | 31.00 | Deleterious |
| p.Ala85Ile | VUS               | -14.32 | Indeterminate | 0.9512 | Pathogenic | -15.31 | Pathogenic | 0.83 | Disease | 1.00 | Probably damaging | 0    | Deleterious |       |             |
| p.Ala85Met | VUS               | -1.40  | Neutral       | 0.9375 | Pathogenic | -12.33 | Pathogenic | 0.78 | Disease | 1.00 | Probably damaging | 0    | Deleterious |       |             |
| p.Ala85His | VUS               | -27.36 | Indeterminate | 0.9894 | Pathogenic | -14.46 | Pathogenic | 0.83 | Disease | 1.00 | Probably damaging | 0    | Deleterious |       |             |
| p.Ala85Gln | VUS               | -17.67 | Indeterminate | 0.9782 | Pathogenic | -10.38 | Pathogenic | 0.83 | Disease | 1.00 | Probably damaging | 0    | Deleterious |       |             |
| p.Ala85Pro | VUS               | -13.79 | Indeterminate | 0.9715 | Pathogenic | -13.26 | Pathogenic | 0.86 | Disease | 1.00 | Probably damaging | 0    | Deleterious | 32.00 | Deleterious |
| p.Ala85Leu | VUS               | -2.77  | Neutral       | 0.8177 | Pathogenic | -11.90 | Pathogenic | 0.81 | Disease | 1.00 | Probably damaging | 0    | Deleterious |       |             |
| p.Ala85Asp | VUS               | -33.22 | Indeterminate | 0.9893 | Pathogenic | -18.56 | Pathogenic | 0.87 | Disease | 1.00 | Probably damaging | 0    | Deleterious | 32.00 | Deleterious |
| p.Ala85Glu | VUS               | -33.20 | Indeterminate | 0.986  | Pathogenic | -16.15 | Pathogenic | 0.87 | Disease | 1.00 | Probably damaging | 0    | Deleterious |       |             |
| p.Ala85Gly | VUS               | -0.46  | Neutral       | 0.5102 | Ambiguous  | -10.76 | Pathogenic | 0.76 | Disease | 1.00 | Probably damaging | 0    | Deleterious | 31.00 | Deleterious |
| p.Ala85Val | VUS               | -9.08  | Indeterminate | 0.7195 | Pathogenic | -9.69  | Pathogenic | 0.64 | Disease | 1.00 | Probably damaging | 0    | Deleterious | 27.20 | Deleterious |
| p.Ala85Tyr | VUS               | -33.10 | Indeterminate | 0.9938 | Pathogenic | -16.68 | Pathogenic | 0.83 | Disease | 1.00 | Probably damaging | 0    | Deleterious |       |             |
| p.Ala85Cys | VUS               | -1.78  | Neutral       | 0.8193 | Pathogenic | -9.92  | Pathogenic | 0.76 | Disease | 1.00 | Probably damaging | 0    | Deleterious |       |             |
| p.Ala85Trp | VUS               | -53.15 | Deleterious   | 0.9971 | Pathogenic | -15.39 | Pathogenic | 0.85 | Disease | 1.00 | Probably damaging | 0    | Deleterious |       |             |
| p.Ala85Phe | VUS               | -30.24 | Indeterminate | 0.9849 | Pathogenic | -15.98 | Pathogenic | 0.83 | Disease | 1.00 | Probably damaging | 0    | Deleterious |       |             |
| p.Ala86Asn | VUS               | -53.15 | Deleterious   | 0.9923 | Pathogenic | -21.15 | Pathogenic | 0.82 | Disease | 0.98 | Probably damaging | 0    | Deleterious |       |             |
| p.Ala86Lys | VUS               | -53.15 | Deleterious   | 0.9984 | Pathogenic | -22.11 | Pathogenic | 0.86 | Disease | 1.00 | Probably damaging | 0    | Deleterious |       |             |
| p.Ala86Thr | VUS               | -0.06  | Neutral       | 0.4991 | Ambiguous  | -8.25  | Pathogenic | 0.87 | Disease | 0.96 | Probably damaging | 0.01 | Deleterious | 32.00 | Deleterious |
| p.Ala86Arg | VUS               | -53.15 | Deleterious   | 0.9881 | Pathogenic | -17.11 | Pathogenic | 0.82 | Disease | 1.00 | Probably damaging | 0    | Deleterious |       |             |
| p.Ala86Ser | VUS               | -2.71  | Neutral       | 0.281  | Benign     | -7.75  | Pathogenic | 0.75 | Disease | 0.17 | Benign            | 0.12 | Tolerated   | 29.60 | Deleterious |
| p.Ala86Ile | VUS               | -5.80  | Indeterminate | 0.8519 | Pathogenic | -14.37 | Pathogenic | 0.85 | Disease | 1.00 | Probably damaging | 0    | Deleterious |       |             |
| p.Ala86Met | VUS               | -53.15 | Deleterious   | 0.906  | Pathogenic | -15.48 | Pathogenic | 0.80 | Disease | 1.00 | Probably damaging | 0    | Deleterious |       |             |
| p.Ala86His | VUS               | -53.15 | Deleterious   | 0.9941 | Pathogenic | -21.22 | Pathogenic | 0.85 | Disease | 1.00 | Probably damaging | 0    | Deleterious |       |             |
| p.Ala86Gln | VUS               | -53.15 | Deleterious   | 0.9798 | Pathogenic | -20.63 | Pathogenic | 0.85 | Disease | 1.00 | Probably damaging | 0    | Deleterious |       |             |
| p.Ala86Pro | VUS               | -53.15 | Deleterious   | 0.9789 | Pathogenic | -15.35 | Pathogenic | 0.92 | Disease | 1.00 | Probably damaging | 0.01 | Deleterious | 32.00 | Deleterious |
| p.Ala86Leu | VUS               | -53.15 | Deleterious   | 0.7887 | Pathogenic | -13.86 | Pathogenic | 0.84 | Disease | 1.00 | Probably damaging | 0    | Deleterious |       |             |
| p.Ala86Asp | VUS               | -53.15 | Deleterious   | 0.9955 | Pathogenic | -18.42 | Pathogenic | 0.92 | Disease | 1.00 | Probably damaging | 0    | Deleterious | 32.00 | Deleterious |
| p.Ala86Glu | VUS               | -53.15 | Deleterious   | 0.9873 | Pathogenic | -18.10 | Pathogenic | 0.92 | Disease | 1.00 | Probably damaging | 0    | Deleterious |       |             |
| p.Ala86Gly | VUS               | -0.02  | Neutral       | 0.5397 | Ambiguous  | -10.00 | Pathogenic | 0.72 | Disease | 0.99 | Probably damaging | 0.03 | Deleterious | 31.00 | Deleterious |
| p.Ala86Val | VUS               | -0.10  | Neutral       | 0.4564 | Ambiguous  | -8.22  | Pathogenic | 0.84 | Disease | 1.00 | Probably damaging | 0.01 | Deleterious | 32.00 | Deleterious |
| p.Ala86Tyr | VUS               | -53.15 | Deleterious   | 0.9965 | Pathogenic | -20.61 | Pathogenic | 0.85 | Disease | 1.00 | Probably damaging | 0    | Deleterious |       |             |
| p.Ala86Cys | VUS               | 0.00   | Neutral       | 0.716  | Pathogenic | -9.01  | Pathogenic | 0.77 | Disease | 1.00 | Probably damaging | 0    | Deleterious |       |             |
| p.Ala86Trp | VUS               | -53.15 | Deleterious   | 0.998  | Pathogenic | -18.82 | Pathogenic | 0.86 | Disease | 1.00 | Probably damaging | 0    | Deleterious |       |             |
| p.Ala86Phe | VUS               | -53.15 | Deleterious   | 0.9859 | Pathogenic | -17.77 | Pathogenic | 0.87 | Disease | 1.00 | Probably damaging | 0    | Deleterious |       |             |
| p.Arg87Asn | VUS               | -3.51  | Neutral       | 0.972  | Pathogenic | -12.31 | Pathogenic | 0.66 | Disease | 1.00 | Probably damaging | 0.12 | Tolerated   |       |             |
| p.Arg87Lys | VUS               | 0.00   | Neutral       | 0.583  | Pathogenic | -7.99  | Pathogenic | 0.58 | Disease | 0.99 | Probably damaging | 0.17 | Tolerated   |       |             |
| p.Arg87Thr | VUS               | -7.09  | Indeterminate | 0.9022 | Pathogenic | -9.79  | Pathogenic | 0.74 | Disease | 1.00 | Probably damaging | 0.88 | Tolerated   |       |             |
| p.Arg87Ser | VUS               | -53.15 | Deleterious   | 0.9346 | Pathogenic | -6.62  | Benign     | 0.73 | Disease | 1.00 | Probably damaging | 0.53 | Tolerated   |       |             |
| p.Arg87Ile | VUS               | -9.73  | Indeterminate | 0.8709 | Pathogenic | -11.77 | Pathogenic | 0.71 | Disease | 1.00 | Probably damaging | 0.04 | Deleterious |       |             |
| p.Arg87Met | VUS               | -19.92 | Indeterminate | 0.9082 | Pathogenic | -11.21 | Pathogenic | 0.68 | Disease | 1.00 | Probably damaging | 0.02 | Deleterious |       |             |
| p.Arg87His | VUS               | -33.21 | Indeterminate | 0.6262 | Pathogenic | -11.02 | Pathogenic | 0.64 | Disease | 1.00 | Probably damaging | 0.03 | Deleterious |       |             |
| p.Arg87Gln | VUS               | -31.79 | Indeterminate | 0.4766 | Ambiguous  | -9.61  | Pathogenic | 0.62 | Disease | 1.00 | Probably damaging | 0.08 | Tolerated   | 32.00 | Deleterious |
| p.Arg87Pro | Pathogenic        | -53.15 | Deleterious   | 0.9811 | Pathogenic | -17.26 | Pathogenic | 0.81 | Disease | 1.00 | Probably damaging | 0.08 | Tolerated   | 32.00 | Deleterious |
| p.Arg87Leu | VUS               | -15.67 | Indeterminate | 0.7068 | Pathogenic | -12.08 | Pathogenic | 0.77 | Disease | 1.00 | Probably damaging | 0.05 | Deleterious | 32.00 | Deleterious |
| p.Arg87Asp | VUS               | -53.15 | Deleterious   | 0.9683 | Pathogenic |        |            |      |         |      |                   |      |             |       |             |

|            |     |        |               |        |            |        |            |      |         |      |                   |       |             |       |             |
|------------|-----|--------|---------------|--------|------------|--------|------------|------|---------|------|-------------------|-------|-------------|-------|-------------|
| p.Glu88Gln | VUS | -9.17  | Indeterminate | 0.3834 | Ambiguous  | -8.59  | Pathogenic | 0.36 | Neutral | 0.99 | Probably damaging | 0.55  | Tolerated   | 26.90 | Deleterious |
| p.Glu88Pro | VUS | -53.15 | Deleterious   | 0.9891 | Pathogenic | -14.03 | Pathogenic | 0.55 | Disease | 1.00 | Probably damaging | 0.33  | Tolerated   |       |             |
| p.Glu88Leu | VUS | -11.28 | Indeterminate | 0.8529 | Pathogenic | -9.54  | Pathogenic | 0.49 | Neutral | 0.94 | Possibly damaging | 0.33  | Tolerated   |       |             |
| p.Glu88Asp | VUS | -8.89  | Indeterminate | 0.7631 | Pathogenic | -8.59  | Pathogenic | 0.26 | Neutral | 0.98 | Probably damaging | 0.68  | Tolerated   | 21.45 | Deleterious |
| p.Glu88Ala | VUS | -4.75  | Neutral       | 0.5098 | Ambiguous  | -5.30  | Benign     | 0.18 | Neutral | 0.50 | Possibly damaging | 0.9   | Tolerated   | 22.70 | Deleterious |
| p.Glu88Gly | VUS | -5.36  | Neutral       | 0.5315 | Ambiguous  | -8.43  | Pathogenic | 0.22 | Neutral | 1.00 | Probably damaging | 0.48  | Tolerated   | 23.40 | Deleterious |
| p.Glu88Val | VUS | -3.02  | Neutral       | 0.8221 | Pathogenic | -9.90  | Pathogenic | 0.44 | Neutral | 0.89 | Possibly damaging | 0.38  | Tolerated   | 26.90 | Deleterious |
| p.Glu88Tyr | VUS | -7.59  | Indeterminate | 0.8342 | Pathogenic | -12.66 | Pathogenic | 0.50 | Neutral | 1.00 | Probably damaging | 0.11  | Tolerated   |       |             |
| p.Glu88Cys | VUS | -4.88  | Neutral       | 0.8882 | Pathogenic | -10.65 | Pathogenic | 0.53 | Disease | 1.00 | Probably damaging | 0.1   | Tolerated   |       |             |
| p.Glu88Trp | VUS | -4.25  | Neutral       | 0.9523 | Pathogenic | -14.19 | Pathogenic | 0.57 | Disease | 1.00 | Probably damaging | 0.03  | Deleterious |       |             |
| p.Glu88Phe | VUS | -10.21 | Indeterminate | 0.9337 | Pathogenic | -12.78 | Pathogenic | 0.50 | Neutral | 1.00 | Probably damaging | 0.09  | Tolerated   |       |             |
| p.Gly89Asn | VUS | -16.97 | Indeterminate | 0.9434 | Pathogenic | -10.52 | Pathogenic | 0.81 | Disease | 1.00 | Probably damaging | 0     | Deleterious |       |             |
| p.Gly89Lys | VUS | -53.15 | Deleterious   | 0.9852 | Pathogenic | -17.07 | Pathogenic | 0.84 | Disease | 1.00 | Probably damaging | 0     | Deleterious |       |             |
| p.Gly89Thr | VUS | -53.15 | Deleterious   | 0.9692 | Pathogenic | -18.41 | Pathogenic | 0.82 | Disease | 1.00 | Probably damaging | 0     | Deleterious |       |             |
| p.Gly89Arg | VUS | -53.15 | Deleterious   | 0.9629 | Pathogenic | -15.21 | Pathogenic | 0.87 | Disease | 1.00 | Probably damaging | 0     | Deleterious | 32.00 | Deleterious |
| p.Gly89Ser | VUS | -53.15 | Deleterious   | 0.8246 | Pathogenic | -13.01 | Pathogenic | 0.84 | Disease | 1.00 | Probably damaging | 0     | Deleterious | 32.00 | Deleterious |
| p.Gly89Ile | VUS | -53.15 | Deleterious   | 0.9909 | Pathogenic | -21.63 | Pathogenic | 0.86 | Disease | 1.00 | Probably damaging | 0     | Deleterious |       |             |
| p.Gly89Met | VUS | -53.15 | Deleterious   | 0.9948 | Pathogenic | -19.70 | Pathogenic | 0.87 | Disease | 1.00 | Probably damaging | 0     | Deleterious |       |             |
| p.Gly89His | VUS | -53.15 | Deleterious   | 0.9876 | Pathogenic | -16.30 | Pathogenic | 0.84 | Disease | 1.00 | Probably damaging | 0     | Deleterious |       |             |
| p.Gly89Gln | VUS | -53.15 | Deleterious   | 0.9814 | Pathogenic | -17.42 | Pathogenic | 0.82 | Disease | 1.00 | Probably damaging | 0     | Deleterious |       |             |
| p.Gly89Pro | VUS | -53.15 | Deleterious   | 0.998  | Pathogenic | -17.63 | Pathogenic | 0.83 | Disease | 1.00 | Probably damaging | 0     | Deleterious |       |             |
| p.Gly89Leu | VUS | -53.15 | Deleterious   | 0.991  | Pathogenic | -18.75 | Pathogenic | 0.85 | Disease | 1.00 | Probably damaging | 0     | Deleterious |       |             |
| p.Gly89Asp | VUS | -53.15 | Deleterious   | 0.9296 | Pathogenic | -10.89 | Pathogenic | 0.86 | Disease | 1.00 | Probably damaging | 0     | Deleterious | 32.00 | Deleterious |
| p.Gly89Glu | VUS | -53.15 | Deleterious   | 0.9738 | Pathogenic | -15.05 | Pathogenic | 0.85 | Disease | 1.00 | Probably damaging | 0     | Deleterious |       |             |
| p.Gly89Ala | VUS | -23.61 | Indeterminate | 0.8544 | Pathogenic | -12.94 | Pathogenic | 0.87 | Disease | 1.00 | Probably damaging | 0     | Deleterious | 29.30 | Deleterious |
| p.Gly89Val | VUS | -53.15 | Deleterious   | 0.981  | Pathogenic | -17.26 | Pathogenic | 0.91 | Disease | 1.00 | Probably damaging | 0     | Deleterious | 31.00 | Deleterious |
| p.Gly89Tyr | VUS | -53.15 | Deleterious   | 0.9872 | Pathogenic | -18.70 | Pathogenic | 0.85 | Disease | 1.00 | Probably damaging | 0     | Deleterious |       |             |
| p.Gly89Cys | VUS | -53.15 | Deleterious   | 0.9645 | Pathogenic | -14.56 | Pathogenic | 0.91 | Disease | 1.00 | Probably damaging | 0     | Deleterious | 32.00 | Deleterious |
| p.Gly89Trp | VUS | -53.15 | Deleterious   | 0.9907 | Pathogenic | -17.79 | Pathogenic | 0.89 | Disease | 1.00 | Probably damaging | 0     | Deleterious |       |             |
| p.Gly89Phe | VUS | -53.15 | Deleterious   | 0.9964 | Pathogenic | -19.66 | Pathogenic | 0.87 | Disease | 1.00 | Probably damaging | 0     | Deleterious |       |             |
| p.Phe90Asn | VUS | -0.08  | Neutral       | 0.8549 | Pathogenic | -9.53  | Pathogenic | 0.83 | Disease | 1.00 | Probably damaging | 0.15  | Tolerated   |       |             |
| p.Phe90Lys | VUS | -2.63  | Neutral       | 0.9421 | Pathogenic | -5.70  | Benign     | 0.79 | Disease | 1.00 | Probably damaging | 0.13  | Tolerated   |       |             |
| p.Phe90Thr | VUS | -3.69  | Neutral       | 0.9749 | Pathogenic | -11.43 | Pathogenic | 0.83 | Disease | 1.00 | Probably damaging | 0.19  | Tolerated   |       |             |
| p.Phe90Arg | VUS | -0.31  | Neutral       | 0.8195 | Pathogenic | -6.11  | Benign     | 0.83 | Disease | 1.00 | Probably damaging | 0.14  | Tolerated   |       |             |
| p.Phe90Ser | VUS | -0.47  | Neutral       | 0.8915 | Pathogenic | -8.46  | Pathogenic | 0.87 | Disease | 1.00 | Probably damaging | 0.33  | Tolerated   | 32.00 | Deleterious |
| p.Phe90Ile | VUS | -0.42  | Neutral       | 0.9075 | Pathogenic | -9.55  | Pathogenic | 0.77 | Disease | 1.00 | Probably damaging | 0.15  | Tolerated   | 32.00 | Deleterious |
| p.Phe90Met | VUS | -0.09  | Neutral       | 0.9148 | Pathogenic | -6.68  | Benign     | 0.76 | Disease | 1.00 | Probably damaging | 0.09  | Tolerated   |       |             |
| p.Phe90His | VUS | -0.17  | Neutral       | 0.6115 | Pathogenic | -6.31  | Benign     | 0.85 | Disease | 1.00 | Probably damaging | 0.36  | Tolerated   |       |             |
| p.Phe90Gln | VUS | -0.06  | Neutral       | 0.8916 | Pathogenic | -7.91  | Pathogenic | 0.81 | Disease | 1.00 | Probably damaging | 0.12  | Tolerated   |       |             |
| p.Phe90Pro | VUS | -8.66  | Indeterminate | 0.9992 | Pathogenic | -15.49 | Pathogenic | 0.83 | Disease | 1.00 | Probably damaging | 0.1   | Tolerated   |       |             |
| p.Phe90Leu | VUS | -0.06  | Neutral       | 0.9825 | Pathogenic | -4.19  | Benign     | 0.80 | Disease | 1.00 | Probably damaging | 0.25  | Tolerated   | 29.17 | Deleterious |
| p.Phe90Asp | VUS | -17.51 | Indeterminate | 0.9453 | Pathogenic | -13.21 | Pathogenic | 0.77 | Disease | 1.00 | Probably damaging | 0.11  | Tolerated   |       |             |
| p.Phe90Glu | VUS | -1.91  | Neutral       | 0.963  | Pathogenic | -12.39 | Pathogenic | 0.82 | Disease | 1.00 | Probably damaging | 0.12  | Tolerated   |       |             |
| p.Phe90Ala | VUS | -0.40  | Neutral       | 0.9492 | Pathogenic | -8.68  | Pathogenic | 0.81 | Disease | 1.00 | Probably damaging | 0.43  | Tolerated   |       |             |
| p.Phe90Gly | VUS | -0.76  | Neutral       | 0.9762 | Pathogenic | -11.21 | Pathogenic | 0.82 | Disease | 1.00 | Probably damaging | 0.19  | Tolerated   |       |             |
| p.Phe90Val | VUS | -1.40  | Neutral       | 0.8919 | Pathogenic | -9.16  | Pathogenic | 0.85 | Disease | 1.00 | Probably damaging | 0.2   | Tolerated   | 31.00 | Deleterious |
| p.Phe90Tyr | VUS | -0.05  | Neutral       | 0.1801 | Benign     | -7.16  | Benign     | 0.72 | Disease | 0.99 | Probably damaging | 0.36  | Tolerated   | 32.00 | Deleterious |
| p.Phe90Cys | VUS | -0.46  | Neutral       | 0.7307 | Pathogenic | -7.78  | Pathogenic | 0.88 | Disease | 1.00 | Probably damaging | 0.07  | Tolerated   | 32.00 | Deleterious |
| p.Phe90Trp | VUS | -0.34  | Neutral       | 0.6305 | Pathogenic | -9.88  | Pathogenic | 0.71 | Disease | 1.00 | Probably damaging | 0.07  | Tolerated   |       |             |
| p.Leu91Asn | VUS | -0.02  | Neutral       | 0.8419 | Pathogenic | -17.48 | Pathogenic | 0.70 | Disease | 1.00 | Probably damaging | 0     | Deleterious |       |             |
| p.Leu91Lys | VUS | -7.34  | Indeterminate | 0.5184 | Ambiguous  | -13.81 | Pathogenic | 0.69 | Disease | 0.99 | Probably damaging | 0     | Deleterious |       |             |
| p.Leu91Thr | VUS | -8.95  | Indeterminate | 0.3834 | Ambiguous  | -11.50 | Pathogenic | 0.66 | Disease | 1.00 | Probably damaging | 0.01  | Deleterious |       |             |
| p.Leu91Arg | VUS | -1.49  | Neutral       | 0.2806 | Benign     | -11.67 | Pathogenic | 0.83 | Disease | 1.00 | Probably damaging | 0     | Deleterious | 32.00 | Deleterious |
| p.Leu91Ser | VUS | -18.24 | Indeterminate | 0.6895 | Pathogenic | -13.58 | Pathogenic | 0.72 | Disease | 1.00 | Probably damaging | 0     | Deleterious |       |             |
| p.Leu91Ile | VUS | -19.53 | Indeterminate | 0.2114 | Benign     | -10.91 | Pathogenic | 0.47 | Neutral | 0.57 | Possibly damaging | 0.24  | Tolerated   |       |             |
| p.Leu91Met | VUS | -33.05 | Indeterminate | 0.3357 | Benign     | -8.49  | Pathogenic | 0.46 | Neutral | 1.00 | Probably damaging | 0.02  | Deleterious | 23.90 | Deleterious |
| p.Leu91His | VUS | -16.61 | Indeterminate | 0.5598 | Ambiguous  | -13.10 | Pathogenic | 0.72 | Disease | 1.00 | Probably damaging | 0     | Deleterious |       |             |
| p.Leu91Gln | VUS | -0.16  | Neutral       | 0.4213 | Ambiguous  | -11.72 | Pathogenic | 0.52 | Disease | 1.00 | Probably damaging | 0     | Deleterious | 31.00 | Deleterious |
| p.Leu91Pro | VUS | -7.49  | Indeterminate | 0.4079 | Ambiguous  | -11.70 | Pathogenic | 0.84 | Disease | 1.00 | Probably damaging | 0     | Deleterious | 32.00 | Deleterious |
| p.Leu91Asp | VUS | -6.28  | Indeterminate | 0.9074 | Pathogenic | -15.92 | Pathogenic | 0.69 | Disease | 1.00 | Probably damaging | 0     | Deleterious |       |             |
| p.Leu91Glu | VUS | -4.76  | Neutral       | 0.6245 | Pathogenic | -13.29 | Pathogenic | 0.68 | Disease | 1.00 | Probably damaging | 0     | Deleterious |       |             |
| p.Leu91Ala | VUS | -1.03  | Neutral       | 0.4238 | Ambiguous  | -11.83 | Pathogenic | 0.61 | Disease | 1.00 | Probably damaging | 0.01  | Deleterious |       |             |
| p.Leu91Gly | VUS | -4.74  | Neutral       | 0.6454 | Pathogenic | -14.23 | Pathogenic | 0.68 | Disease | 1.00 | Probably damaging | 0     | Deleterious |       |             |
| p.Leu91Val | VUS | -2.65  | Neutral       | 0.1689 | Benign     | -8.72  | Pathogenic | 0.39 | Neutral | 0.89 | Possibly damaging | 0.18  | Tolerated   | 23.40 | Deleterious |
| p.Leu91Tyr | VUS | -53.15 | Deleterious   | 0.7318 | Pathogenic | -14.27 | Pathogenic | 0.60 | Disease | 1.00 | Probably damaging | 0     | Deleterious |       |             |
| p.Leu91Cys | VUS | -0.69  | Neutral       | 0.749  | Pathogenic | -13.62 | Pathogenic | 0.61 | Disease | 1.00 | Probably damaging | 0     | Deleterious |       |             |
| p.Leu91Trp | VUS | -8.02  | Indeterminate | 0.5174 | Ambiguous  | -13.64 | Pathogenic | 0.65 | Disease | 1.00 | Probably damaging | 0     | Deleterious |       |             |
| p.Leu91Phe | VUS | -21.09 | Indeterminate | 0.4145 | Ambiguous  | -10.97 | Pathogenic | 0.61 | Disease | 1.00 | Probably damaging | 0.02  | Deleterious |       |             |
| p.Asp92Asn | VUS | -3.34  | Neutral       | 0.4396 | Ambiguous  | -10.26 | Pathogenic | 0.60 | Disease | 0.99 | Probably damaging | 0.35  | Tolerated   | 32.00 | Deleterious |
| p.Asp92Lys | VUS | -7.05  | Indeterminate | 0.7779 | Pathogenic | -13.34 | Pathogenic | 0.66 | Disease | 1.00 | Probably damaging | 0.05  | Deleterious |       |             |
| p.Asp92Thr | VUS | -1.00  | Neutral       | 0.6917 | Pathogenic | -11.07 | Pathogenic | 0.65 | Disease | 1.00 | Probably damaging | -0.04 | Deleterious |       |             |
| p.Asp92Arg | VUS | -1.01  | Neutral       | 0.643  | Pathogenic | -11.51 | Pathogenic | 0.64 | Disease | 1.00 | Probably damaging | 0.02  | Deleterious |       |             |
| p.Asp92Ser | VUS | -3.99  | Neutral       | 0.4136 | Ambiguous  | -8.28  | Pathogenic | 0.58 | Disease | 1.00 | Probably damaging | 0.08  | Tolerated   |       |             |
| p.Asp92Ile | VUS | -2.32  | Neutral       | 0.9298 | Pathogenic | -16.37 | Pathogenic | 0.64 | Disease | 1.00 | Probably damaging | 0     | Deleterious |       |             |
| p.Asp92Met | VUS | -0.61  | Neutral       | 0.9641 | Pathogenic | -14.36 | Pathogenic | 0.68 | Disease | 1.00 | Probably damaging | 0     | Deleterious |       |             |
| p.Asp92His | VUS | -4.28  | Neutral       | 0.5663 | Pathogenic | -11.15 | Pathogenic | 0.66 | Disease | 1.00 | Probably damaging | 0.03  | Deleterious | 32.00 | Deleterious |
| p.Asp92Gln | VUS | -0.89  | Neutral       | 0.5609 | Ambiguous  | -10.85 | Pathogenic | 0.59 | Disease | 1.00 | Probably damaging | 0.03  | Deleterious |       |             |
| p.Asp92Pro | VUS | -1.59  | Neutral       | 0.4936 | Ambiguous  | -10.20 | Pathogenic | 0.66 | Disease | 0.99 | Probably damaging | 0.03  | Deleterious |       |             |
| p.Asp92Leu | VUS | -0.53  | Neutral       | 0.8186 | Pathogenic | -12.76 | Pathogenic | 0.68 | Disease | 1.00 | Probably damaging | 0.01  | Deleterious |       |             |
| p.Asp92Glu | VUS | -3.93  | Neutral       | 0.3017 | Benign     | -6.36  | Benign     | 0.19 | Neutral | 0.93 | Possibly damaging | 0.07  | Tolerated   | 22.80 | Deleterious |
| p.Asp92Ala | VUS | -0.99  | Neutral       | 0.3843 | Ambiguous  | -7.59  | Pathogenic | 0.39 | Neutral | 1.00 | Probably damaging | 0.16  | Tolerated   | 28.20 | Deleterious |
| p.Asp92Gly | VUS | -5.17  | Neutral       | 0.3826 | Ambiguous  | -6.77  | Benign     | 0.40 | Neutral | 1.00 | Probably damaging | 0.1   | Tolerated   | 31.00 | Deleterious |
| p.Asp92Val | VUS | -0.82  | Neutral       | 0.7553 | Pathogenic | -12.77 | Pathogenic | 0.72 | Disease | 1.00 | Probably damaging | 0.01  | Deleterious | 30.00 | Deleterious |
| p.Asp92Tyr | VUS | -4.06  | Neutral       | 0.7255 | Pathogenic | -15.33 | Pathogenic | 0.78 | Disease | 1.00 | Probably damaging | 0.02  | Deleterious | 32.00 | Deleterious |
| p.Asp92Cys | VUS | -0.57  | Neutral       | 0.9254 | Pathogenic | -13.02 | Pathogenic | 0.63 | Disease | 1.00 | Probably damaging | 0.01  | Deleterious |       |             |
| p.Asp92Trp | VUS | -3.72  | Neutral       | 0.9587 | Pathogenic | -13.87 | Pathogenic | 0.67 | Disease | 1.00 | Probably damaging | 0     | Deleterious |       |             |
| p.Asp92Phe | VUS | -4.82  | Neutral       | 0.9489 | Pathogenic | -16.79 | Pathogenic | 0.68 | Disease | 1.00 | Probably damaging | 0.01  | Deleterious |       |             |
| p.Thr93Asn | VUS | -16.51 | Indeterminate | 0.697  | Pathogenic | -9.47  | Pathogenic | 0.81 | Disease | 1.00 | Probably damaging | 0.07  | Tolerated   |       |             |
| p.Thr93Lys | VUS | -53.15 | Deleterious   | 0.9499 | Pathogenic | -12.30 | Pathogenic | 0.86 | Disease | 1.00 | Probably damaging | 0.07  | Tolerated   | 29.50 | Deleterious |
| p.Thr93Arg | VUS | -33.14 | Indeterminate | 0.914  | Pathogenic | -15.35 | Pathogenic | 0.87 | Disease | 1.00 | Probably damaging | 0.04  | Deleterious | 29.00 | Deleterious |
| p.Thr93Ser | VUS | -8.91  | Indeterminate | 0.4599 | Ambiguous  | -8.45  | Pathogenic | 0.68 | Disease | 1.00 | Probably damaging | 0.29  | Tolerated   | 26.90 | Deleterious |
| p.Thr93Ile | VUS | -0.81  | Neutral       | 0.6269 | Pathogenic | -9.66  | Pathogenic | 0.86 | Disease | 1.00 | Probably damaging | 0.23  | Tolerated   |       |             |
| p.Thr93Met | VUS | -13.29 | Indeterminate | 0.4101 | Ambiguous  | -9.46  | Pathogenic | 0.80 | Disease | 1.00 | Probably damaging | 0.08  | Tolerated   | 29.70 | Deleterious |
| p.Thr93His | VUS | -25.89 | Indeterminate | 0.8809 | Pathogenic | -11.97 | Pathogenic | 0.78 | Disease | 1.00 | Probably damaging | 0.02  | Deleterious |       |             |
| p.Thr93Gln | VUS | -20.83 | Indeterminate | 0.8851 | Pathogenic | -11.62 | Pathogenic | 0.75 | Disease | 1.00 | Probably damaging | 0.05  |             |       |             |

|            |                   |        |               |        |            |        |            |      |         |      |                   |      |             |       |             |
|------------|-------------------|--------|---------------|--------|------------|--------|------------|------|---------|------|-------------------|------|-------------|-------|-------------|
| p.Leu94Ile | VUS               | -0.01  | Neutral       | 0.1938 | Benign     | -6.65  | Benign     | 0.31 | Neutral | 1.00 | Probably damaging | 0.09 | Tolerated   |       |             |
| p.Leu94Met | VUS               | -0.01  | Neutral       | 0.2911 | Benign     | -9.48  | Pathogenic | 0.47 | Neutral | 1.00 | Probably damaging | 0.03 | Deleterious | 24.10 | Deleterious |
| p.Leu94His | VUS               | -53.15 | Deleterious   | 0.9832 | Pathogenic | -17.38 | Pathogenic | 0.80 | Disease | 1.00 | Probably damaging | 0    | Deleterious |       |             |
| p.Leu94Gln | Likely pathogenic | -53.15 | Deleterious   | 0.9434 | Pathogenic | -17.94 | Pathogenic | 0.86 | Disease | 1.00 | Probably damaging | 0.01 | Deleterious | 31.00 | Deleterious |
| p.Leu94Pro | Likely pathogenic | -53.15 | Deleterious   | 0.9693 | Pathogenic | -14.99 | Pathogenic | 0.92 | Disease | 1.00 | Probably damaging | 0.01 | Deleterious | 31.00 | Deleterious |
| p.Leu94Asp | VUS               | -53.15 | Deleterious   | 0.9968 | Pathogenic | -19.02 | Pathogenic | 0.73 | Disease | 1.00 | Probably damaging | 0    | Deleterious |       |             |
| p.Leu94Glu | VUS               | -53.15 | Deleterious   | 0.9784 | Pathogenic | -18.62 | Pathogenic | 0.74 | Disease | 1.00 | Probably damaging | 0    | Deleterious |       |             |
| p.Leu94Ala | VUS               | -33.22 | Indeterminate | 0.5738 | Pathogenic | -10.94 | Pathogenic | 0.64 | Disease | 1.00 | Probably damaging | 0.02 | Deleterious |       |             |
| p.Leu94Gly | VUS               | -53.15 | Deleterious   | 0.9556 | Pathogenic | -16.15 | Pathogenic | 0.70 | Disease | 1.00 | Probably damaging | 0    | Deleterious |       |             |
| p.Leu94Val | VUS               | -3.56  | Neutral       | 0.096  | Benign     | -5.53  | Benign     | 0.22 | Neutral | 1.00 | Probably damaging | 0.45 | Tolerated   | 18.64 | Deleterious |
| p.Leu94Tyr | VUS               | -53.15 | Deleterious   | 0.9829 | Pathogenic | -15.31 | Pathogenic | 0.68 | Disease | 1.00 | Probably damaging | 0.01 | Deleterious |       |             |
| p.Leu94Cys | VUS               | -8.77  | Indeterminate | 0.8797 | Pathogenic | -12.71 | Pathogenic | 0.63 | Disease | 1.00 | Probably damaging | 0    | Deleterious |       |             |
| p.Leu94Trp | VUS               | -53.15 | Deleterious   | 0.9769 | Pathogenic | -16.43 | Pathogenic | 0.72 | Disease | 1.00 | Probably damaging | 0    | Deleterious |       |             |
| p.Leu94Phe | VUS               | -9.94  | Indeterminate | 0.8065 | Pathogenic | -10.88 | Pathogenic | 0.52 | Disease | 1.00 | Probably damaging | 0.03 | Deleterious |       |             |
| p.Val95Asn | VUS               | -4.64  | Neutral       | 0.5539 | Ambiguous  | -12.79 | Pathogenic | 0.37 | Neutral | 0.90 | Possibly damaging | 0.38 | Tolerated   |       |             |
| p.Val95Lys | VUS               | -0.83  | Neutral       | 0.3308 | Benign     | -8.07  | Pathogenic | 0.19 | Neutral | 0.33 | Benign            | 1    | Tolerated   |       |             |
| p.Val95Thr | VUS               | -4.38  | Neutral       | 0.2304 | Benign     | -7.25  | Benign     | 0.28 | Neutral | 0.67 | Possibly damaging | 0.45 | Tolerated   |       |             |
| p.Val95Arg | VUS               | -3.32  | Neutral       | 0.1836 | Benign     | -6.75  | Benign     | 0.17 | Neutral | 0.52 | Possibly damaging | 0.65 | Tolerated   |       |             |
| p.Val95Ser | VUS               | -4.99  | Neutral       | 0.3177 | Benign     | -9.04  | Pathogenic | 0.33 | Neutral | 0.83 | Possibly damaging | 0.52 | Tolerated   |       |             |
| p.Val95Ile | VUS               | -2.11  | Neutral       | 0.1425 | Benign     | -6.02  | Benign     | 0.20 | Neutral | 0.01 | Benign            | 0.18 | Tolerated   |       |             |
| p.Val95Met | VUS               | -5.88  | Indeterminate | 0.2892 | Benign     | -7.98  | Pathogenic | 0.12 | Neutral | 0.02 | Benign            | 0.1  | Tolerated   | 15.05 | Deleterious |
| p.Val95His | VUS               | -0.48  | Neutral       | 0.5271 | Ambiguous  | -10.30 | Pathogenic | 0.23 | Neutral | 0.95 | Possibly damaging | 0.15 | Tolerated   |       |             |
| p.Val95Gln | VUS               | -11.31 | Indeterminate | 0.2673 | Benign     | -7.77  | Pathogenic | 0.20 | Neutral | 0.42 | Benign            | 0.56 | Tolerated   |       |             |
| p.Val95Pro | VUS               | -53.15 | Deleterious   | 0.7501 | Pathogenic | -13.48 | Pathogenic | 0.38 | Neutral | 0.82 | Possibly damaging | 0.25 | Tolerated   |       |             |
| p.Val95Leu | VUS               | -1.93  | Neutral       | 0.1973 | Benign     | -7.70  | Pathogenic | 0.10 | Neutral | 0.00 | Benign            | 0.28 | Tolerated   | 13.66 | Neutral     |
| p.Val95Asp | VUS               | -2.24  | Neutral       | 0.5199 | Ambiguous  | -13.25 | Pathogenic | 0.37 | Neutral | 0.99 | Probably damaging | 0.53 | Tolerated   |       |             |
| p.Val95Glu | VUS               | -3.95  | Neutral       | 0.2418 | Benign     | -10.87 | Pathogenic | 0.41 | Neutral | 0.91 | Possibly damaging | 0.97 | Tolerated   | 12.13 | Neutral     |
| p.Val95Ala | VUS               | -0.53  | Neutral       | 0.1371 | Benign     | -5.31  | Benign     | 0.09 | Neutral | 0.02 | Benign            | 0.6  | Tolerated   | 10.96 | Neutral     |
| p.Val95Gly | VUS               | -2.19  | Neutral       | 0.2822 | Benign     | -9.77  | Pathogenic | 0.27 | Neutral | 0.93 | Possibly damaging | 0.29 | Tolerated   | 14.08 | Neutral     |
| p.Val95Tyr | VUS               | -5.69  | Neutral       | 0.6414 | Pathogenic | -12.32 | Pathogenic | 0.37 | Neutral | 0.68 | Possibly damaging | 0.08 | Tolerated   |       |             |
| p.Val95Cys | VUS               | -1.01  | Neutral       | 0.7598 | Pathogenic | -7.33  | Benign     | 0.37 | Neutral | 0.96 | Probably damaging | 0.05 | Deleterious |       |             |
| p.Val95Trp | VUS               | -8.18  | Indeterminate | 0.8085 | Pathogenic | -11.12 | Pathogenic | 0.40 | Neutral | 0.99 | Probably damaging | 0.03 | Deleterious |       |             |
| p.Val95Phe | VUS               | -6.73  | Indeterminate | 0.2799 | Benign     | -12.40 | Pathogenic | 0.35 | Neutral | 0.52 | Possibly damaging | 0.07 | Tolerated   |       |             |
| p.Val96Asn | VUS               | -5.06  | Neutral       | 0.7289 | Pathogenic | -13.54 | Pathogenic | 0.51 | Disease | 0.77 | Possibly damaging | 0.02 | Deleterious |       |             |
| p.Val96Lys | VUS               | -0.44  | Neutral       | 0.7191 | Pathogenic | -14.08 | Pathogenic | 0.51 | Disease | 0.05 | Benign            | 0.04 | Deleterious |       |             |
| p.Val96Thr | VUS               | -0.49  | Neutral       | 0.2976 | Benign     | -6.39  | Benign     | 0.23 | Neutral | 0.56 | Possibly damaging | 0.23 | Tolerated   |       |             |
| p.Val96Arg | VUS               | -0.44  | Neutral       | 0.4778 | Ambiguous  | -10.88 | Pathogenic | 0.50 | Disease | 0.19 | Benign            | 0.12 | Tolerated   |       |             |
| p.Val96Ser | VUS               | -0.05  | Neutral       | 0.4376 | Ambiguous  | -8.35  | Pathogenic | 0.41 | Neutral | 0.61 | Possibly damaging | 0.04 | Deleterious |       |             |
| p.Val96Ile | VUS               | -5.81  | Indeterminate | 0.1363 | Benign     | -7.63  | Pathogenic | 0.10 | Neutral | 0.00 | Benign            | 0.48 | Tolerated   |       |             |
| p.Val96Met | VUS               | -0.70  | Neutral       | 0.3646 | Ambiguous  | -8.53  | Pathogenic | 0.11 | Neutral | 0.01 | Benign            | 0.06 | Tolerated   | 20.90 | Deleterious |
| p.Val96His | VUS               | -4.73  | Neutral       | 0.7703 | Pathogenic | -12.65 | Pathogenic | 0.46 | Neutral | 0.54 | Possibly damaging | 0.01 | Deleterious |       |             |
| p.Val96Gln | VUS               | -2.82  | Neutral       | 0.538  | Ambiguous  | -11.35 | Pathogenic | 0.45 | Neutral | 0.07 | Benign            | 0.03 | Deleterious |       |             |
| p.Val96Pro | VUS               | -1.23  | Neutral       | 0.7634 | Pathogenic | -10.28 | Pathogenic | 0.48 | Neutral | 0.66 | Possibly damaging | 0.05 | Deleterious |       |             |
| p.Val96Leu | VUS               | -12.83 | Indeterminate | 0.25   | Benign     | -5.17  | Benign     | 0.07 | Neutral | 0.00 | Benign            | 0.36 | Tolerated   | 15.88 | Deleterious |
| p.Val96Asp | VUS               | -10.72 | Indeterminate | 0.7853 | Pathogenic | -13.82 | Pathogenic | 0.59 | Disease | 0.90 | Possibly damaging | 0.02 | Deleterious |       |             |
| p.Val96Glu | VUS               | -1.00  | Neutral       | 0.5405 | Ambiguous  | -12.30 | Pathogenic | 0.29 | Neutral | 0.01 | Benign            | 0.04 | Deleterious | 14.61 | Neutral     |
| p.Val96Ala | VUS               | -53.15 | Deleterious   | 0.2136 | Benign     | -4.20  | Benign     | 0.08 | Neutral | 0.00 | Benign            | 0.32 | Tolerated   | 6.24  | Neutral     |
| p.Val96Gly | VUS               | -5.35  | Neutral       | 0.4053 | Ambiguous  | -10.47 | Pathogenic | 0.37 | Neutral | 0.80 | Possibly damaging | 0.01 | Deleterious | 18.21 | Deleterious |
| p.Val96Tyr | VUS               | -7.43  | Indeterminate | 0.7911 | Pathogenic | -13.57 | Pathogenic | 0.40 | Neutral | 0.83 | Possibly damaging | 0.02 | Deleterious |       |             |
| p.Val96Cys | VUS               | -8.48  | Indeterminate | 0.766  | Pathogenic | -6.53  | Benign     | 0.38 | Neutral | 0.83 | Possibly damaging | 0.05 | Deleterious |       |             |
| p.Val96Trp | VUS               | -17.98 | Indeterminate | 0.8816 | Pathogenic | -11.55 | Pathogenic | 0.40 | Neutral | 0.98 | Probably damaging | 0.01 | Deleterious |       |             |
| p.Val96Phe | VUS               | -3.30  | Neutral       | 0.3632 | Ambiguous  | -10.93 | Pathogenic | 0.38 | Neutral | 0.45 | Benign            | 0.04 | Deleterious |       |             |
| p.Leu97Asn | VUS               | -53.15 | Deleterious   | 0.9929 | Pathogenic | -18.02 | Pathogenic | 0.90 | Disease | 1.00 | Probably damaging | 0    | Deleterious |       |             |
| p.Leu97Lys | VUS               | -53.15 | Deleterious   | 0.9869 | Pathogenic | -20.26 | Pathogenic | 0.87 | Disease | 0.99 | Probably damaging | 0    | Deleterious |       |             |
| p.Leu97Thr | VUS               | -53.15 | Deleterious   | 0.974  | Pathogenic | -14.28 | Pathogenic | 0.89 | Disease | 1.00 | Probably damaging | 0    | Deleterious |       |             |
| p.Leu97Arg | VUS               | -53.15 | Deleterious   | 0.9325 | Pathogenic | -14.97 | Pathogenic | 0.98 | Disease | 1.00 | Probably damaging | 0    | Deleterious | 29.90 | Deleterious |
| p.Leu97Ser | VUS               | -53.15 | Deleterious   | 0.9912 | Pathogenic | -12.95 | Pathogenic | 0.97 | Disease | 1.00 | Probably damaging | 0    | Deleterious |       |             |
| p.Leu97Ile | VUS               | -0.26  | Neutral       | 0.5969 | Pathogenic | -12.02 | Pathogenic | 0.76 | Disease | 1.00 | Probably damaging | 0    | Deleterious |       |             |
| p.Leu97Met | VUS               | -0.03  | Neutral       | 0.6247 | Pathogenic | -8.97  | Pathogenic | 0.82 | Disease | 1.00 | Probably damaging | 0    | Deleterious | 28.20 | Deleterious |
| p.Leu97His | VUS               | -53.15 | Deleterious   | 0.9765 | Pathogenic | -13.98 | Pathogenic | 0.96 | Disease | 1.00 | Probably damaging | 0    | Deleterious |       |             |
| p.Leu97Gln | VUS               | -53.15 | Deleterious   | 0.9516 | Pathogenic | -13.04 | Pathogenic | 0.98 | Disease | 1.00 | Probably damaging | 0    | Deleterious | 29.20 | Deleterious |
| p.Leu97Pro | VUS               | -53.15 | Deleterious   | 0.9583 | Pathogenic | -11.16 | Pathogenic | 0.99 | Disease | 1.00 | Probably damaging | 0    | Deleterious | 29.70 | Deleterious |
| p.Leu97Asp | VUS               | -53.15 | Deleterious   | 0.9983 | Pathogenic | -18.54 | Pathogenic | 0.88 | Disease | 1.00 | Probably damaging | 0    | Deleterious |       |             |
| p.Leu97Glu | VUS               | -53.15 | Deleterious   | 0.9855 | Pathogenic | -17.43 | Pathogenic | 0.90 | Disease | 1.00 | Probably damaging | 0    | Deleterious |       |             |
| p.Leu97Ala | VUS               | -53.15 | Deleterious   | 0.9489 | Pathogenic | -12.12 | Pathogenic | 0.87 | Disease | 1.00 | Probably damaging | 0    | Deleterious |       |             |
| p.Leu97Gly | VUS               | -53.15 | Deleterious   | 0.98   | Pathogenic | -16.62 | Pathogenic | 0.90 | Disease | 1.00 | Probably damaging | 0    | Deleterious |       |             |
| p.Leu97Val | VUS               | -11.89 | Indeterminate | 0.6824 | Pathogenic | -12.00 | Pathogenic | 0.86 | Disease | 1.00 | Probably damaging | 0    | Deleterious | 27.70 | Deleterious |
| p.Leu97Tyr | VUS               | -0.83  | Neutral       | 0.9699 | Pathogenic | -14.71 | Pathogenic | 0.86 | Disease | 1.00 | Probably damaging | 0    | Deleterious |       |             |
| p.Leu97Cys | VUS               | -0.82  | Neutral       | 0.9414 | Pathogenic | -13.95 | Pathogenic | 0.82 | Disease | 1.00 | Probably damaging | 0    | Deleterious |       |             |
| p.Leu97Trp | VUS               | -53.15 | Deleterious   | 0.9348 | Pathogenic | -13.49 | Pathogenic | 0.89 | Disease | 1.00 | Probably damaging | 0    | Deleterious |       |             |
| p.Leu97Phe | VUS               | -0.45  | Neutral       | 0.7408 | Pathogenic | -11.26 | Pathogenic | 0.86 | Disease | 1.00 | Probably damaging | 0    | Deleterious |       |             |
| p.His98Asn | VUS               | -0.67  | Neutral       | 0.6006 | Pathogenic | -11.17 | Pathogenic | 0.57 | Disease | 1.00 | Probably damaging | 0.05 | Deleterious | 24.30 | Deleterious |
| p.His98Lys | VUS               | -1.47  | Neutral       | 0.8132 | Pathogenic | -11.46 | Pathogenic | 0.54 | Disease | 0.65 | Possibly damaging | 0.08 | Tolerated   |       |             |
| p.His98Thr | VUS               | -2.77  | Neutral       | 0.8741 | Pathogenic | -13.12 | Pathogenic | 0.58 | Disease | 1.00 | Probably damaging | 0.16 | Tolerated   |       |             |
| p.His98Arg | VUS               | -0.45  | Neutral       | 0.4032 | Ambiguous  | -6.80  | Benign     | 0.32 | Neutral | 0.02 | Benign            | 0.07 | Tolerated   | 21.30 | Deleterious |
| p.His98Ser | VUS               | -3.55  | Neutral       | 0.6155 | Pathogenic | -10.39 | Pathogenic | 0.55 | Disease | 1.00 | Probably damaging | 0.07 | Tolerated   |       |             |
| p.His98Ile | VUS               | -0.50  | Neutral       | 0.8886 | Pathogenic | -13.55 | Pathogenic | 0.61 | Disease | 0.98 | Probably damaging | 0.45 | Tolerated   |       |             |
| p.His98Met | VUS               | -0.87  | Neutral       | 0.9337 | Pathogenic | -13.32 | Pathogenic | 0.56 | Disease | 1.00 | Probably damaging | 0.23 | Tolerated   |       |             |
| p.His98Gln | VUS               | -4.71  | Neutral       | 0.5458 | Ambiguous  | -7.97  | Pathogenic | 0.54 | Disease | 0.80 | Possibly damaging | 0.07 | Tolerated   | 21.20 | Deleterious |
| p.His98Pro | VUS               | -53.15 | Deleterious   | 0.9124 | Pathogenic | -16.70 | Pathogenic | 0.60 | Disease | 1.00 | Probably damaging | 0.07 | Tolerated   | 23.90 | Deleterious |
| p.His98Leu | VUS               | -2.42  | Neutral       | 0.4531 | Ambiguous  | -10.14 | Pathogenic | 0.33 | Neutral | 0.87 | Possibly damaging | 1    | Tolerated   | 21.10 | Deleterious |
| p.His98Asp | VUS               | -3.97  | Neutral       | 0.6312 | Pathogenic | -11.83 | Pathogenic | 0.62 | Disease | 1.00 | Probably damaging | 0.03 | Deleterious | 24.60 | Deleterious |
| p.His98Glu | VUS               | -0.45  | Neutral       | 0.714  | Pathogenic | -12.40 | Pathogenic | 0.55 | Disease | 0.99 | Probably damaging | 0.06 | Tolerated   |       |             |
| p.His98Ala | VUS               | -0.20  | Neutral       | 0.6583 | Pathogenic | -10.81 | Pathogenic | 0.56 | Disease | 1.00 | Probably damaging | 0.23 | Tolerated   |       |             |
| p.His98Gly | VUS               | -2.35  | Neutral       | 0.7349 | Pathogenic | -11.64 | Pathogenic | 0.56 | Disease | 1.00 | Probably damaging | 0.04 | Deleterious |       |             |
| p.His98Val | VUS               | -0.16  | Neutral       | 0.7307 | Pathogenic | -10.20 | Pathogenic | 0.29 | Neutral | 1.00 | Probably damaging | 0.49 | Tolerated   |       |             |
| p.His98Tyr | VUS               | -0.56  | Neutral       | 0.2623 | Benign     | -8.49  | Pathogenic | 0.54 | Disease | 0.98 | Probably damaging | 0.08 | Tolerated   | 23.20 | Deleterious |
| p.His98Cys | VUS               | -0.94  | Neutral       | 0.6208 | Pathogenic | -10.68 | Pathogenic | 0.54 | Disease | 1.00 | Probably damaging | 0.05 | Deleterious |       |             |
| p.His98Trp | VUS               | -0.29  | Neutral       | 0.6278 | Pathogenic | -10.62 | Pathogenic | 0.59 | Disease | 1.00 | Probably damaging | 0.03 | Deleterious |       |             |
| p.His98Phe | VUS               | -0.37  | Neutral       | 0.7347 | Pathogenic | -10.97 | Pathogenic | 0.38 | Neutral | 1.00 | Probably damaging | 0.21 | Tolerated   |       |             |
| p.Arg99Asn | VUS               | -8.76  | Indeterminate | 0.5313 | Ambiguous  | -11.41 | Pathogenic | 0.50 | Neutral | 0.96 | Probably damaging | 0.48 | Tolerated   |       |             |
| p.Arg99Lys | VUS               | -6.84  | Indeterminate | 0.2293 | Benign     | -7.88  | Pathogenic | 0.40 | Neutral | 0.02 | Benign            | 0.79 | Tolerated   |       |             |
| p.Arg99Thr | VUS               | -18.03 | Indeterminate | 0.3207 | Benign     | -12.37 | Pathogenic | 0.53 | Disease | 0.96 | Probably damaging | 0.25 | Tolerated   |       |             |
| p.Arg99Ser | VUS               | -10.56 | Indeterminate | 0.4364 | Ambiguous  | -10.45 | Pathogenic | 0.30 | Neutral | 0.99 | Probably damaging | 0.3  | Tolerated   |       |             |
| p.Arg99Ile | VUS               | -7.17  | Indeterminate | 0.5564 | Ambiguous  | -15.76 | Pathogenic | 0.54 | Disease | 1.00 | Probably damaging | 0.08 | Tolerated   |       |             |
| p.Arg99Met | VUS               | -15.32 | Indeterminate | 0.5306 | Ambiguous  | -14.31 |            |      |         |      |                   |      |             |       |             |

|             |            |        |               |        |            |        |            |      |         |      |                   |      |             |       |             |
|-------------|------------|--------|---------------|--------|------------|--------|------------|------|---------|------|-------------------|------|-------------|-------|-------------|
| p.Ala100Thr | VUS        | -1.44  | Neutral       | 0.2533 | Benign     | -10.20 | Pathogenic | 0.41 | Neutral | 1.00 | Probably damaging | 0.39 | Tolerated   | 18.57 | Deleterious |
| p.Ala100Arg | VUS        | 0.00   | Neutral       | 0.3656 | Ambiguous  | -4.54  | Benign     | 0.52 | Disease | 1.00 | Probably damaging | 0.35 | Tolerated   |       |             |
| p.Ala100Ser | Benign     | -0.01  | Neutral       | 0.1502 | Benign     | -5.63  | Benign     | 0.25 | Neutral | 0.97 | Probably damaging | 0.4  | Tolerated   | 16.80 | Deleterious |
| p.Ala100Ile | VUS        | -0.08  | Neutral       | 0.6148 | Pathogenic | -13.16 | Pathogenic | 0.37 | Neutral | 1.00 | Probably damaging | 0.39 | Tolerated   |       |             |
| p.Ala100Met | VUS        | -0.05  | Neutral       | 0.4862 | Ambiguous  | -10.76 | Pathogenic | 0.47 | Neutral | 1.00 | Probably damaging | 0.22 | Tolerated   |       |             |
| p.Ala100His | VUS        | 0.00   | Neutral       | 0.2773 | Benign     | -2.80  | Benign     | 0.47 | Neutral | 1.00 | Probably damaging | 0.54 | Tolerated   |       |             |
| p.Ala100Gln | VUS        | -0.06  | Neutral       | 0.3302 | Benign     | -8.15  | Pathogenic | 0.48 | Neutral | 1.00 | Probably damaging | 0.29 | Tolerated   |       |             |
| p.Ala100Pro | VUS        | -53.15 | Deleterious   | 0.9671 | Pathogenic | -12.76 | Pathogenic | 0.56 | Disease | 1.00 | Probably damaging | 0.2  | Tolerated   | 22.60 | Deleterious |
| p.Ala100Leu | VUS        | -0.01  | Neutral       | 0.4268 | Ambiguous  | -8.48  | Pathogenic | 0.34 | Neutral | 1.00 | Probably damaging | 0.65 | Tolerated   |       |             |
| p.Ala100Asp | VUS        | -1.07  | Neutral       | 0.6518 | Pathogenic | -11.39 | Pathogenic | 0.60 | Disease | 1.00 | Probably damaging | 0.21 | Tolerated   | 22.80 | Deleterious |
| p.Ala100Glu | VUS        | -3.66  | Neutral       | 0.4117 | Ambiguous  | -10.24 | Pathogenic | 0.32 | Neutral | 1.00 | Probably damaging | 0.28 | Tolerated   |       |             |
| p.Ala100Gly | VUS        | -53.15 | Deleterious   | 0.1742 | Benign     | -5.19  | Benign     | 0.27 | Neutral | 1.00 | Probably damaging | 0.34 | Tolerated   | 19.20 | Deleterious |
| p.Ala100Val | VUS        | 0.00   | Neutral       | 0.2647 | Benign     | -8.74  | Pathogenic | 0.26 | Neutral | 1.00 | Probably damaging | 0.5  | Tolerated   | 22.40 | Deleterious |
| p.Ala100Tyr | VUS        | -1.42  | Neutral       | 0.5139 | Ambiguous  | -4.04  | Benign     | 0.51 | Disease | 1.00 | Probably damaging | 1    | Tolerated   |       |             |
| p.Ala100Cys | VUS        | 0.00   | Neutral       | 0.4116 | Ambiguous  | -6.21  | Benign     | 0.46 | Neutral | 1.00 | Probably damaging | 0.18 | Tolerated   |       |             |
| p.Ala100Trp | VUS        | 0.00   | Neutral       | 0.6812 | Pathogenic | -4.53  | Benign     | 0.55 | Disease | 1.00 | Probably damaging | 0.18 | Tolerated   |       |             |
| p.Ala100Phe | VUS        | 0.00   | Neutral       | 0.4423 | Ambiguous  | -4.04  | Benign     | 0.36 | Neutral | 1.00 | Probably damaging | 0.7  | Tolerated   |       |             |
| p.Gly101Asn | VUS        | -6.43  | Indeterminate | 0.8106 | Pathogenic | -12.58 | Pathogenic | 0.56 | Disease | 1.00 | Probably damaging | 0.09 | Tolerated   |       |             |
| p.Gly101Lys | VUS        | -13.62 | Indeterminate | 0.7814 | Pathogenic | -12.51 | Pathogenic | 0.42 | Neutral | 1.00 | Probably damaging | 0.09 | Tolerated   |       |             |
| p.Gly101Thr | VUS        | -26.84 | Indeterminate | 0.8392 | Pathogenic | -13.88 | Pathogenic | 0.47 | Neutral | 1.00 | Probably damaging | 0.04 | Deleterious |       |             |
| p.Gly101Arg | VUS        | -10.33 | Indeterminate | 0.6226 | Pathogenic | -9.29  | Pathogenic | 0.53 | Disease | 1.00 | Probably damaging | 0.04 | Deleterious | 26.75 | Deleterious |
| p.Gly101Ser | VUS        | -7.05  | Indeterminate | 0.5163 | Ambiguous  | -10.72 | Pathogenic | 0.54 | Disease | 1.00 | Probably damaging | 0.07 | Tolerated   |       |             |
| p.Gly101Ile | VUS        | -53.15 | Deleterious   | 0.9774 | Pathogenic | -19.70 | Pathogenic | 0.65 | Disease | 1.00 | Probably damaging | 0.01 | Deleterious |       |             |
| p.Gly101Met | VUS        | -14.55 | Indeterminate | 0.9705 | Pathogenic | -15.37 | Pathogenic | 0.66 | Disease | 1.00 | Probably damaging | 0.01 | Deleterious |       |             |
| p.Gly101His | VUS        | -12.96 | Indeterminate | 0.8225 | Pathogenic | -11.05 | Pathogenic | 0.40 | Neutral | 1.00 | Probably damaging | 0.03 | Deleterious |       |             |
| p.Gly101Gln | VUS        | -7.18  | Indeterminate | 0.7227 | Pathogenic | -12.08 | Pathogenic | 0.43 | Neutral | 1.00 | Probably damaging | 0.25 | Tolerated   |       |             |
| p.Gly101Pro | VUS        | -53.15 | Deleterious   | 0.9934 | Pathogenic | -17.02 | Pathogenic | 0.62 | Disease | 1.00 | Probably damaging | 0.04 | Deleterious |       |             |
| p.Gly101Leu | VUS        | -53.15 | Deleterious   | 0.9599 | Pathogenic | -14.19 | Pathogenic | 0.65 | Disease | 1.00 | Probably damaging | 0.02 | Deleterious |       |             |
| p.Gly101Asp | VUS        | -3.90  | Neutral       | 0.6576 | Pathogenic | -11.78 | Pathogenic | 0.61 | Disease | 1.00 | Probably damaging | 0.17 | Tolerated   |       |             |
| p.Gly101Glu | VUS        | -15.02 | Indeterminate | 0.759  | Pathogenic | -13.11 | Pathogenic | 0.63 | Disease | 1.00 | Probably damaging | 0.35 | Tolerated   | 26.80 | Deleterious |
| p.Gly101Ala | VUS        | -11.65 | Indeterminate | 0.6391 | Pathogenic | -10.21 | Pathogenic | 0.51 | Disease | 1.00 | Probably damaging | 0.09 | Tolerated   | 25.60 | Deleterious |
| p.Gly101Val | VUS        | -53.15 | Deleterious   | 0.9342 | Pathogenic | -15.06 | Pathogenic | 0.67 | Disease | 1.00 | Probably damaging | 0.02 | Deleterious | 26.60 | Deleterious |
| p.Gly101Tyr | VUS        | -33.17 | Indeterminate | 0.9532 | Pathogenic | -15.85 | Pathogenic | 0.65 | Disease | 1.00 | Probably damaging | 0.01 | Deleterious |       |             |
| p.Gly101Cys | VUS        | -5.64  | Neutral       | 0.8484 | Pathogenic | -12.72 | Pathogenic | 0.65 | Disease | 1.00 | Probably damaging | 0.01 | Deleterious |       |             |
| p.Gly101Trp | Pathogenic | -53.15 | Deleterious   | 0.9495 | Pathogenic | -14.73 | Pathogenic | 0.71 | Disease | 1.00 | Probably damaging | 0    | Deleterious | 28.90 | Deleterious |
| p.Gly101Phe | VUS        | -32.01 | Indeterminate | 0.9773 | Pathogenic | -15.88 | Pathogenic | 0.65 | Disease | 1.00 | Probably damaging | 0.01 | Deleterious |       |             |
| p.Ala102Asn | VUS        | -53.15 | Deleterious   | 0.9525 | Pathogenic | -17.84 | Pathogenic | 0.80 | Disease | 0.91 | Possibly damaging | 0    | Deleterious |       |             |
| p.Ala102Lys | VUS        | -53.15 | Deleterious   | 0.9904 | Pathogenic | -22.38 | Pathogenic | 0.83 | Disease | 1.00 | Probably damaging | 0    | Deleterious |       |             |
| p.Ala102Thr | VUS        | -53.15 | Deleterious   | 0.6023 | Pathogenic | -11.13 | Pathogenic | 0.79 | Disease | 0.92 | Possibly damaging | 0.01 | Deleterious | 28.40 | Deleterious |
| p.Ala102Arg | VUS        | -53.15 | Deleterious   | 0.9445 | Pathogenic | -18.16 | Pathogenic | 0.79 | Disease | 1.00 | Probably damaging | 0    | Deleterious |       |             |
| p.Ala102Ser | VUS        | -53.15 | Deleterious   | 0.2741 | Benign     | -9.44  | Pathogenic | 0.74 | Disease | 0.39 | Benign            | 0.02 | Deleterious | 27.00 | Deleterious |
| p.Ala102Ile | VUS        | -53.15 | Deleterious   | 0.9049 | Pathogenic | -16.43 | Pathogenic | 0.83 | Disease | 1.00 | Probably damaging | 0    | Deleterious |       |             |
| p.Ala102Met | VUS        | -53.15 | Deleterious   | 0.8938 | Pathogenic | -15.76 | Pathogenic | 0.78 | Disease | 1.00 | Probably damaging | 0    | Deleterious |       |             |
| p.Ala102His | VUS        | -53.15 | Deleterious   | 0.9635 | Pathogenic | -18.36 | Pathogenic | 0.81 | Disease | 1.00 | Probably damaging | 0    | Deleterious |       |             |
| p.Ala102Gln | VUS        | -53.15 | Deleterious   | 0.9233 | Pathogenic | -17.47 | Pathogenic | 0.84 | Disease | 1.00 | Probably damaging | 0    | Deleterious |       |             |
| p.Ala102Pro | VUS        | -53.15 | Deleterious   | 0.9353 | Pathogenic | -13.22 | Pathogenic | 0.86 | Disease | 1.00 | Probably damaging | 0.01 | Deleterious | 28.30 | Deleterious |
| p.Ala102Leu | VUS        | -53.15 | Deleterious   | 0.7181 | Pathogenic | -14.15 | Pathogenic | 0.82 | Disease | 0.99 | Probably damaging | 0    | Deleterious |       |             |
| p.Ala102Asp | VUS        | -53.15 | Deleterious   | 0.9578 | Pathogenic | -15.69 | Pathogenic | 0.88 | Disease | 0.99 | Probably damaging | 0    | Deleterious |       |             |
| p.Ala102Glu | VUS        | -53.15 | Deleterious   | 0.9565 | Pathogenic | -16.01 | Pathogenic | 0.86 | Disease | 1.00 | Probably damaging | 0    | Deleterious | 27.70 | Deleterious |
| p.Ala102Gly | VUS        | -0.03  | Neutral       | 0.2432 | Benign     | -8.21  | Pathogenic | 0.66 | Disease | 0.04 | Benign            | 0.06 | Tolerated   | 28.80 | Deleterious |
| p.Ala102Val | VUS        | -18.01 | Indeterminate | 0.639  | Pathogenic | -9.19  | Pathogenic | 0.75 | Disease | 1.00 | Probably damaging | 0.01 | Deleterious | 28.70 | Deleterious |
| p.Ala102Tyr | VUS        | -53.15 | Deleterious   | 0.9663 | Pathogenic | -19.07 | Pathogenic | 0.83 | Disease | 1.00 | Probably damaging | 0    | Deleterious |       |             |
| p.Ala102Cys | VUS        | -12.41 | Indeterminate | 0.6812 | Pathogenic | -10.37 | Pathogenic | 0.75 | Disease | 1.00 | Probably damaging | 0    | Deleterious |       |             |
| p.Ala102Trp | VUS        | -53.15 | Deleterious   | 0.981  | Pathogenic | -17.78 | Pathogenic | 0.83 | Disease | 1.00 | Probably damaging | 0    | Deleterious |       |             |
| p.Ala102Phe | VUS        | -53.15 | Deleterious   | 0.9308 | Pathogenic | -18.43 | Pathogenic | 0.84 | Disease | 1.00 | Probably damaging | 0    | Deleterious |       |             |
| p.Arg103Asn | VUS        | -0.01  | Neutral       | 0.4251 | Ambiguous  | -11.54 | Pathogenic | 0.38 | Neutral | 1.00 | Probably damaging | 0.89 | Tolerated   |       |             |
| p.Arg103Lys | VUS        | -0.48  | Neutral       | 0.2025 | Benign     | -7.78  | Pathogenic | 0.36 | Neutral | 0.78 | Possibly damaging | 0.26 | Tolerated   |       |             |
| p.Arg103Thr | VUS        | -6.16  | Indeterminate | 0.1995 | Benign     | -10.46 | Pathogenic | 0.50 | Neutral | 1.00 | Probably damaging | 0.17 | Tolerated   |       |             |
| p.Arg103Ser | VUS        | -0.01  | Neutral       | 0.2587 | Benign     | -9.19  | Pathogenic | 0.30 | Neutral | 1.00 | Probably damaging | 0.41 | Tolerated   |       |             |
| p.Arg103Ile | VUS        | -3.14  | Neutral       | 0.3389 | Benign     | -12.16 | Pathogenic | 0.53 | Disease | 1.00 | Probably damaging | 0.02 | Deleterious |       |             |
| p.Arg103Met | VUS        | -3.90  | Neutral       | 0.3543 | Ambiguous  | -11.90 | Pathogenic | 0.54 | Disease | 1.00 | Probably damaging | 0.02 | Deleterious |       |             |
| p.Arg103His | VUS        | -0.99  | Neutral       | 0.1323 | Benign     | -7.95  | Pathogenic | 0.32 | Neutral | 0.99 | Probably damaging | 0.16 | Tolerated   |       |             |
| p.Arg103Gln | VUS        | -0.97  | Neutral       | 0.1029 | Benign     | -8.15  | Pathogenic | 0.28 | Neutral | 0.94 | Possibly damaging | 0.17 | Tolerated   | 19.34 | Deleterious |
| p.Arg103Pro | VUS        | -0.63  | Neutral       | 0.3065 | Benign     | -10.10 | Pathogenic | 0.58 | Disease | 1.00 | Probably damaging | 0.13 | Tolerated   | 22.90 | Deleterious |
| p.Arg103Leu | VUS        | -0.01  | Neutral       | 0.1593 | Benign     | -9.92  | Pathogenic | 0.55 | Disease | 1.00 | Probably damaging | 0.04 | Deleterious | 20.30 | Deleterious |
| p.Arg103Asp | VUS        | 0.00   | Neutral       | 0.3581 | Ambiguous  | -10.15 | Pathogenic | 0.29 | Neutral | 1.00 | Probably damaging | 1    | Tolerated   |       |             |
| p.Arg103Glu | VUS        | -2.72  | Neutral       | 0.2591 | Benign     | -10.02 | Pathogenic | 0.37 | Neutral | 0.90 | Possibly damaging | 0.28 | Tolerated   |       |             |
| p.Arg103Ala | VUS        | 0.00   | Neutral       | 0.1801 | Benign     | -8.30  | Pathogenic | 0.45 | Neutral | 0.98 | Probably damaging | 0.17 | Tolerated   |       |             |
| p.Arg103Gly | VUS        | -0.01  | Neutral       | 0.1779 | Benign     | -10.95 | Pathogenic | 0.32 | Neutral | 1.00 | Probably damaging | 0.52 | Tolerated   | 22.60 | Deleterious |
| p.Arg103Val | VUS        | -0.16  | Neutral       | 0.2474 | Benign     | -9.95  | Pathogenic | 0.55 | Disease | 1.00 | Probably damaging | 0.03 | Deleterious |       |             |
| p.Arg103Tyr | VUS        | -0.63  | Neutral       | 0.4737 | Ambiguous  | -11.61 | Pathogenic | 0.50 | Neutral | 0.99 | Probably damaging | 0.08 | Tolerated   |       |             |
| p.Arg103Cys | VUS        | -0.01  | Neutral       | 0.2144 | Benign     | -9.27  | Pathogenic | 0.56 | Disease | 1.00 | Probably damaging | 0.04 | Deleterious |       |             |
| p.Arg103Trp | VUS        | -0.24  | Neutral       | 0.2676 | Benign     | -11.13 | Pathogenic | 0.54 | Disease | 1.00 | Probably damaging | 0.02 | Deleterious | 26.40 | Deleterious |
| p.Arg103Phe | VUS        | 0.00   | Neutral       | 0.5257 | Ambiguous  | -12.21 | Pathogenic | 0.53 | Disease | 0.99 | Probably damaging | 0.03 | Deleterious |       |             |
| p.Leu104Asn | VUS        | 0.00   | Neutral       | 0.8502 | Pathogenic | -17.13 | Pathogenic | 0.62 | Disease | 1.00 | Probably damaging | 0    | Deleterious |       |             |
| p.Leu104Lys | VUS        | -11.35 | Indeterminate | 0.7882 | Pathogenic | -17.24 | Pathogenic | 0.64 | Disease | 0.98 | Probably damaging | 0.01 | Deleterious |       |             |
| p.Leu104Thr | VUS        | 0.00   | Neutral       | 0.3934 | Ambiguous  | -9.66  | Pathogenic | 0.61 | Disease | 1.00 | Probably damaging | 0.02 | Deleterious |       |             |
| p.Leu104Arg | VUS        | -53.15 | Deleterious   | 0.5814 | Pathogenic | -13.14 | Pathogenic | 0.73 | Disease | 1.00 | Probably damaging | 0.01 | Deleterious | 28.00 | Deleterious |
| p.Leu104Ser | VUS        | 0.00   | Neutral       | 0.7933 | Pathogenic | -12.46 | Pathogenic | 0.65 | Disease | 1.00 | Probably damaging | 0.01 | Deleterious |       |             |
| p.Leu104Ile | VUS        | 0.00   | Neutral       | 0.2168 | Benign     | -7.73  | Pathogenic | 0.45 | Neutral | 1.00 | Probably damaging | 0.41 | Tolerated   |       |             |
| p.Leu104Met | VUS        | 0.00   | Neutral       | 0.2598 | Benign     | -5.42  | Benign     | 0.46 | Neutral | 1.00 | Probably damaging | 0.04 | Deleterious | 25.70 | Deleterious |
| p.Leu104His | VUS        | 0.00   | Neutral       | 0.7805 | Pathogenic | -14.47 | Pathogenic | 0.62 | Disease | 1.00 | Probably damaging | 0    | Deleterious |       |             |
| p.Leu104Gln | VUS        | 0.00   | Neutral       | 0.6621 | Pathogenic | -13.35 | Pathogenic | 0.69 | Disease | 1.00 | Probably damaging | 0.01 | Deleterious | 27.40 | Deleterious |
| p.Leu104Pro | VUS        | -0.01  | Neutral       | 0.2401 | Benign     | -9.68  | Pathogenic | 0.27 | Neutral | 1.00 | Probably damaging | 0.01 | Deleterious | 24.50 | Deleterious |
| p.Leu104Asp | VUS        | 0.00   | Neutral       | 0.9278 | Pathogenic | -16.57 | Pathogenic | 0.64 | Disease | 1.00 | Probably damaging | 0    | Deleterious |       |             |
| p.Leu104Glu | VUS        | 0.00   | Neutral       | 0.7798 | Pathogenic | -15.90 | Pathogenic | 0.64 | Disease | 1.00 | Probably damaging | 0.01 | Deleterious |       |             |
| p.Leu104Ala | VUS        | 0.00   | Neutral       | 0.5071 | Ambiguous  | -10.47 | Pathogenic | 0.37 | Neutral | 1.00 | Probably damaging | 0.02 | Deleterious |       |             |
| p.Leu104Gly | VUS        | -53.15 | Deleterious   | 0.7488 | Pathogenic | -12.87 | Pathogenic | 0.61 | Disease | 1.00 | Probably damaging | 0.01 | Deleterious |       |             |
| p.Leu104Val | VUS        | 0.00   | Neutral       | 0.1816 | Benign     | -7.26  | Benign     | 0.16 | Neutral | 0.99 | Probably damaging | 0.84 | Tolerated   | 23.50 | Deleterious |
| p.Leu104Tyr | VUS        | 0.00   | Neutral       | 0.8168 | Pathogenic | -14.67 | Pathogenic | 0.55 | Disease | 0.99 | Probably damaging | 0.01 | Deleterious |       |             |
| p.Leu104Cys | VUS        | 0.00   | Neutral       | 0.7713 | Pathogenic | -11.82 | Pathogenic | 0.56 | Disease | 1.00 | Probably damaging | 0.01 | Deleterious |       |             |
| p.Leu104Trp | VUS        | 0.00   | Neutral       | 0.5661 | Pathogenic | -12.84 | Pathogenic | 0.57 | Disease | 1.00 | Probably damaging | 0    | Deleterious |       |             |
| p.Leu104Phe | VUS        | 0.00   | Neutral       | 0.439  | Ambiguous  | -10.35 | Pathogenic | 0.50 | Neutral | 1.00 | Probably damaging | 0.03 | Deleterious |       |             |
| p.Asp105Asn | VUS        | -2.86  | Neutral       | 0.2727 | Benign     | -8.41  | Pathogenic | 0.24 | Neutral | 0.98 | Probably damaging | 1    | Tolerated   | 19.47 | Deleterious |
| p.Asp105Lys | VUS        | -15.87 | Indeterminate |        |            |        |            |      |         |      |                   |      |             |       |             |

|             |     |        |               |        |            |        |            |      |         |      |                   |      |             |       |
|-------------|-----|--------|---------------|--------|------------|--------|------------|------|---------|------|-------------------|------|-------------|-------|
| p.Asp105Phe | VUS | -16.15 | Indeterminate | 0.9163 | Pathogenic | -12.06 | Pathogenic | 0.51 | Disease | 1.00 | Probably damaging | 0.03 | Deleterious |       |
| p.Val106Asn | VUS | -8.17  | Indeterminate | 0.5709 | Pathogenic | -13.95 | Pathogenic | 0.51 | Disease | 1.00 | Probably damaging | 0.03 | Deleterious |       |
| p.Val106Lys | VUS | -16.70 | Indeterminate | 0.5522 | Ambiguous  | -15.08 | Pathogenic | 0.55 | Disease | 1.00 | Probably damaging | 0.05 | Deleterious |       |
| p.Val106Thr | VUS | -1.68  | Neutral       | 0.2756 | Benign     | -7.63  | Pathogenic | 0.30 | Neutral | 1.00 | Probably damaging | 0.16 | Tolerated   |       |
| p.Val106Arg | VUS | -24.14 | Indeterminate | 0.3403 | Ambiguous  | -10.26 | Pathogenic | 0.51 | Disease | 1.00 | Probably damaging | 0.04 | Deleterious |       |
| p.Val106Ser | VUS | -0.72  | Neutral       | 0.3524 | Ambiguous  | -8.63  | Pathogenic | 0.48 | Neutral | 1.00 | Probably damaging | 0.14 | Tolerated   |       |
| p.Val106Ile | VUS | -1.09  | Neutral       | 0.1505 | Benign     | -7.97  | Pathogenic | 0.11 | Neutral | 0.97 | Probably damaging | 0.55 | Tolerated   |       |
| p.Val106Met | VUS | -0.81  | Neutral       | 0.3682 | Ambiguous  | -7.68  | Pathogenic | 0.36 | Neutral | 1.00 | Probably damaging | 0.07 | Tolerated   | 25.60 |
| p.Val106His | VUS | -0.71  | Neutral       | 0.6751 | Pathogenic | -10.67 | Pathogenic | 0.51 | Disease | 1.00 | Probably damaging | 0.03 | Deleterious |       |
| p.Val106Gln | VUS | -1.67  | Neutral       | 0.3212 | Benign     | -8.12  | Pathogenic | 0.30 | Neutral | 1.00 | Probably damaging | 0.04 | Deleterious |       |
| p.Val106Pro | VUS | -21.83 | Indeterminate | 0.8011 | Pathogenic | -9.45  | Pathogenic | 0.51 | Disease | 1.00 | Probably damaging | 0.05 | Deleterious |       |
| p.Val106Leu | VUS | -9.78  | Indeterminate | 0.3179 | Benign     | -5.92  | Benign     | 0.09 | Neutral | 0.98 | Probably damaging | 0.25 | Tolerated   | 21.55 |
| p.Val106Asp | VUS | -1.29  | Neutral       | 0.4428 | Ambiguous  | -10.12 | Pathogenic | 0.59 | Disease | 1.00 | Probably damaging | 0.02 | Deleterious |       |
| p.Val106Glu | VUS | -29.44 | Indeterminate | 0.2415 | Benign     | -8.47  | Pathogenic | 0.60 | Disease | 1.00 | Probably damaging | 0.04 | Deleterious | 26.30 |
| p.Val106Ala | VUS | -5.62  | Neutral       | 0.2098 | Benign     | -4.32  | Benign     | 0.13 | Neutral | 1.00 | Probably damaging | 0.4  | Tolerated   | 23.40 |
| p.Val106Gly | VUS | -9.59  | Indeterminate | 0.2586 | Benign     | -8.95  | Pathogenic | 0.43 | Neutral | 1.00 | Probably damaging | 0.03 | Deleterious | 26.10 |
| p.Val106Tyr | VUS | -1.56  | Neutral       | 0.7948 | Pathogenic | -14.22 | Pathogenic | 0.50 | Neutral | 1.00 | Probably damaging | 0.06 | Tolerated   |       |
| p.Val106Cys | VUS | -1.64  | Neutral       | 0.6917 | Pathogenic | -9.60  | Pathogenic | 0.44 | Neutral | 1.00 | Probably damaging | 0.05 | Deleterious |       |
| p.Val106Trp | VUS | -13.39 | Indeterminate | 0.8982 | Pathogenic | -12.41 | Pathogenic | 0.47 | Neutral | 1.00 | Probably damaging | 0.01 | Deleterious |       |
| p.Val106Phe | VUS | -1.15  | Neutral       | 0.3839 | Ambiguous  | -11.84 | Pathogenic | 0.49 | Neutral | 1.00 | Probably damaging | 0.17 | Tolerated   |       |
| p.Arg107Asn | VUS | -2.70  | Neutral       | 0.6572 | Pathogenic | -14.08 | Pathogenic | 0.44 | Neutral | 0.27 | Benign            | 0.5  | Tolerated   |       |
| p.Arg107Lys | VUS | -0.88  | Neutral       | 0.2096 | Benign     | -7.96  | Pathogenic | 0.20 | Neutral | 0.02 | Benign            | 0.92 | Tolerated   |       |
| p.Arg107Thr | VUS | -0.06  | Neutral       | 0.2177 | Benign     | -9.41  | Pathogenic | 0.43 | Neutral | 0.43 | Benign            | 0.6  | Tolerated   |       |
| p.Arg107Ser | VUS | -3.51  | Neutral       | 0.4114 | Ambiguous  | -10.34 | Pathogenic | 0.38 | Neutral | 0.86 | Possibly damaging | 0.73 | Tolerated   | 23.80 |
| p.Arg107Ile | VUS | -1.12  | Neutral       | 0.3829 | Ambiguous  | -13.41 | Pathogenic | 0.49 | Neutral | 0.93 | Possibly damaging | 0.22 | Tolerated   |       |
| p.Arg107Met | VUS | -0.08  | Neutral       | 0.4767 | Ambiguous  | -11.83 | Pathogenic | 0.49 | Neutral | 0.72 | Possibly damaging | 0.12 | Tolerated   |       |
| p.Arg107His | VUS | -1.66  | Neutral       | 0.2041 | Benign     | -8.80  | Pathogenic | 0.19 | Neutral | 0.00 | Benign            | 0.16 | Tolerated   | 18.27 |
| p.Arg107Gln | VUS | 0.00   | Neutral       | 0.1418 | Benign     | -8.82  | Pathogenic | 0.19 | Neutral | 0.02 | Benign            | 0.6  | Tolerated   |       |
| p.Arg107Pro | VUS | -0.08  | Neutral       | 0.1271 | Benign     | -6.34  | Benign     | 0.22 | Neutral | 0.98 | Probably damaging | 0.29 | Tolerated   | 16.64 |
| p.Arg107Leu | VUS | -2.08  | Neutral       | 0.2011 | Benign     | -8.63  | Pathogenic | 0.26 | Neutral | 0.88 | Possibly damaging | 0.35 | Tolerated   | 22.00 |
| p.Arg107Asp | VUS | -1.62  | Neutral       | 0.6577 | Pathogenic | -14.97 | Pathogenic | 0.47 | Neutral | 0.76 | Possibly damaging | 0.61 | Tolerated   |       |
| p.Arg107Glu | VUS | -5.67  | Neutral       | 0.3408 | Ambiguous  | -10.44 | Pathogenic | 0.29 | Neutral | 0.04 | Benign            | 1    | Tolerated   |       |
| p.Arg107Ala | VUS | -0.01  | Neutral       | 0.1877 | Benign     | -7.89  | Pathogenic | 0.24 | Neutral | 0.24 | Benign            | 0.77 | Tolerated   |       |
| p.Arg107Gly | VUS | -1.60  | Neutral       | 0.1981 | Benign     | -9.62  | Pathogenic | 0.43 | Neutral | 0.86 | Possibly damaging | 0.39 | Tolerated   | 24.10 |
| p.Arg107Val | VUS | -0.10  | Neutral       | 0.3024 | Benign     | -10.32 | Pathogenic | 0.51 | Disease | 0.73 | Possibly damaging | 0.35 | Tolerated   |       |
| p.Arg107Tyr | VUS | -1.06  | Neutral       | 0.5547 | Ambiguous  | -10.26 | Pathogenic | 0.45 | Neutral | 0.04 | Benign            | 0.12 | Tolerated   |       |
| p.Arg107Cys | VUS | -8.51  | Indeterminate | 0.2239 | Benign     | -9.83  | Pathogenic | 0.50 | Neutral | 0.22 | Benign            | 0.08 | Tolerated   | 28.50 |
| p.Arg107Trp | VUS | -0.08  | Neutral       | 0.3155 | Benign     | -12.74 | Pathogenic | 0.49 | Neutral | 0.86 | Possibly damaging | 0.03 | Deleterious |       |
| p.Arg107Phe | VUS | -1.19  | Neutral       | 0.6012 | Pathogenic | -10.67 | Pathogenic | 0.51 | Disease | 0.07 | Benign            | 0.11 | Tolerated   |       |
| p.Asp108Asn | VUS | -0.78  | Neutral       | 0.8442 | Pathogenic | -9.82  | Pathogenic | 0.70 | Disease | 1.00 | Probably damaging | 0.43 | Tolerated   | 31.00 |
| p.Asp108Lys | VUS | -53.15 | Deleterious   | 0.9973 | Pathogenic | -18.69 | Pathogenic | 0.78 | Disease | 1.00 | Probably damaging | 0.02 | Deleterious |       |
| p.Asp108Thr | VUS | -31.02 | Indeterminate | 0.9831 | Pathogenic | -13.75 | Pathogenic | 0.77 | Disease | 1.00 | Probably damaging | 0.02 | Deleterious |       |
| p.Asp108Arg | VUS | -53.15 | Deleterious   | 0.9944 | Pathogenic | -19.00 | Pathogenic | 0.78 | Disease | 1.00 | Probably damaging | 0.01 | Deleterious |       |
| p.Asp108Ser | VUS | -53.15 | Deleterious   | 0.9524 | Pathogenic | -14.48 | Pathogenic | 0.74 | Disease | 1.00 | Probably damaging | 0.22 | Tolerated   |       |
| p.Asp108Ile | VUS | -53.15 | Deleterious   | 0.9979 | Pathogenic | -19.67 | Pathogenic | 0.82 | Disease | 1.00 | Probably damaging | 0    | Deleterious |       |
| p.Asp108Met | VUS | -53.15 | Deleterious   | 0.9983 | Pathogenic | -18.14 | Pathogenic | 0.81 | Disease | 1.00 | Probably damaging | 0    | Deleterious |       |
| p.Asp108His | VUS | -53.15 | Deleterious   | 0.9917 | Pathogenic | -16.58 | Pathogenic | 0.87 | Disease | 1.00 | Probably damaging | 0.02 | Deleterious | 29.20 |
| p.Asp108Gln | VUS | -53.15 | Deleterious   | 0.9959 | Pathogenic | -18.53 | Pathogenic | 0.74 | Disease | 1.00 | Probably damaging | 0.02 | Deleterious |       |
| p.Asp108Pro | VUS | -53.15 | Deleterious   | 0.9971 | Pathogenic | -20.06 | Pathogenic | 0.79 | Disease | 0.97 | Probably damaging | 0.01 | Deleterious |       |
| p.Asp108Leu | VUS | -53.15 | Deleterious   | 0.9897 | Pathogenic | -19.60 | Pathogenic | 0.81 | Disease | 1.00 | Probably damaging | 0    | Deleterious |       |
| p.Asp108Glu | VUS | -11.70 | Indeterminate | 0.9837 | Pathogenic | -10.69 | Pathogenic | 0.73 | Disease | 0.82 | Possibly damaging | 0.03 | Deleterious | 22.30 |
| p.Asp108Ala | VUS | -53.15 | Deleterious   | 0.9849 | Pathogenic | -14.98 | Pathogenic | 0.83 | Disease | 1.00 | Probably damaging | 0.02 | Deleterious | 29.00 |
| p.Asp108Gly | VUS | -53.15 | Deleterious   | 0.9533 | Pathogenic | -13.96 | Pathogenic | 0.87 | Disease | 1.00 | Probably damaging | 0.06 | Tolerated   | 29.60 |
| p.Asp108Val | VUS | -53.15 | Deleterious   | 0.989  | Pathogenic | -17.56 | Pathogenic | 0.90 | Disease | 1.00 | Probably damaging | 0    | Deleterious | 29.30 |
| p.Asp108Tyr | VUS | -53.15 | Deleterious   | 0.9811 | Pathogenic | -16.66 | Pathogenic | 0.73 | Disease | 1.00 | Probably damaging | 0.01 | Deleterious | 31.00 |
| p.Asp108Cys | VUS | -53.15 | Deleterious   | 0.9907 | Pathogenic | -12.83 | Pathogenic | 0.82 | Disease | 1.00 | Probably damaging | 0    | Deleterious |       |
| p.Asp108Trp | VUS | -53.15 | Deleterious   | 0.9992 | Pathogenic | -21.27 | Pathogenic | 0.81 | Disease | 1.00 | Probably damaging | 0    | Deleterious |       |
| p.Asp108Phe | VUS | -53.15 | Deleterious   | 0.9984 | Pathogenic | -21.33 | Pathogenic | 0.83 | Disease | 1.00 | Probably damaging | 0    | Deleterious |       |
| p.Ala109Asn | VUS | 0.00   | Neutral       | 0.4117 | Ambiguous  | -13.00 | Pathogenic | 0.22 | Neutral | 0.91 | Possibly damaging | 0.87 | Tolerated   |       |
| p.Ala109Lys | VUS | -0.84  | Neutral       | 0.5698 | Pathogenic | -12.24 | Pathogenic | 0.25 | Neutral | 0.99 | Probably damaging | 0.74 | Tolerated   |       |
| p.Ala109Thr | VUS | -0.16  | Neutral       | 0.1665 | Benign     | -9.23  | Pathogenic | 0.20 | Neutral | 0.07 | Benign            | 0.49 | Tolerated   | 20.30 |
| p.Ala109Arg | VUS | -0.44  | Neutral       | 0.345  | Ambiguous  | -8.44  | Pathogenic | 0.28 | Neutral | 1.00 | Probably damaging | 0.38 | Tolerated   |       |
| p.Ala109Ser | VUS | 0.00   | Neutral       | 0.1441 | Benign     | -6.48  | Benign     | 0.23 | Neutral | 0.25 | Benign            | 0.91 | Tolerated   | 18.06 |
| p.Ala109Ile | VUS | 0.00   | Neutral       | 0.4344 | Ambiguous  | -13.28 | Pathogenic | 0.36 | Neutral | 0.99 | Probably damaging | 0.13 | Tolerated   |       |
| p.Ala109Met | VUS | 0.00   | Neutral       | 0.491  | Ambiguous  | -12.83 | Pathogenic | 0.28 | Neutral | 1.00 | Probably damaging | 0.08 | Tolerated   |       |
| p.Ala109His | VUS | 0.00   | Neutral       | 0.5129 | Ambiguous  | -12.47 | Pathogenic | 0.25 | Neutral | 1.00 | Probably damaging | 0.16 | Tolerated   |       |
| p.Ala109Gln | VUS | -0.04  | Neutral       | 0.3616 | Ambiguous  | -10.25 | Pathogenic | 0.21 | Neutral | 1.00 | Probably damaging | 0.42 | Tolerated   |       |
| p.Ala109Pro | VUS | -53.15 | Deleterious   | 0.376  | Ambiguous  | -8.64  | Pathogenic | 0.35 | Neutral | 1.00 | Probably damaging | 0.29 | Tolerated   | 22.90 |
| p.Ala109Leu | VUS | -0.83  | Neutral       | 0.3332 | Benign     | -11.69 | Pathogenic | 0.27 | Neutral | 0.98 | Probably damaging | 0.22 | Tolerated   |       |
| p.Ala109Asp | VUS | -0.01  | Neutral       | 0.4589 | Ambiguous  | -13.00 | Pathogenic | 0.37 | Neutral | 0.98 | Probably damaging | 0.73 | Tolerated   | 18.50 |
| p.Ala109Glu | VUS | -1.19  | Neutral       | 0.3553 | Ambiguous  | -11.40 | Pathogenic | 0.31 | Neutral | 0.99 | Probably damaging | 0.69 | Tolerated   |       |
| p.Ala109Gly | VUS | 0.00   | Neutral       | 0.142  | Benign     | -5.89  | Benign     | 0.22 | Neutral | 0.96 | Probably damaging | 0.67 | Tolerated   | 16.99 |
| p.Ala109Val | VUS | -0.01  | Neutral       | 0.2152 | Benign     | -9.47  | Pathogenic | 0.19 | Neutral | 0.92 | Possibly damaging | 0.22 | Tolerated   | 18.10 |
| p.Ala109Tyr | VUS | -0.01  | Neutral       | 0.6138 | Pathogenic | -15.63 | Pathogenic | 0.39 | Neutral | 1.00 | Probably damaging | 0.08 | Tolerated   |       |
| p.Ala109Cys | VUS | 0.00   | Neutral       | 0.4761 | Ambiguous  | -9.32  | Pathogenic | 0.37 | Neutral | 1.00 | Probably damaging | 0.08 | Tolerated   |       |
| p.Ala109Trp | VUS | -0.02  | Neutral       | 0.7885 | Pathogenic | -14.26 | Pathogenic | 0.43 | Neutral | 1.00 | Probably damaging | 0.02 | Deleterious |       |
| p.Ala109Phe | VUS | -0.40  | Neutral       | 0.5707 | Pathogenic | -15.34 | Pathogenic | 0.40 | Neutral | 1.00 | Probably damaging | 0.06 | Tolerated   |       |
| p.Trp110Asn | VUS | -0.41  | Neutral       | 0.7983 | Pathogenic | -8.67  | Pathogenic | 0.31 | Neutral | 1.00 | Probably damaging | 0.14 | Tolerated   |       |
| p.Trp110Lys | VUS | -1.92  | Neutral       | 0.8356 | Pathogenic | -7.22  | Benign     | 0.46 | Neutral | 1.00 | Probably damaging | 0.21 | Tolerated   |       |
| p.Trp110Thr | VUS | -0.13  | Neutral       | 0.699  | Pathogenic | -6.84  | Benign     | 0.43 | Neutral | 1.00 | Probably damaging | 0.14 | Tolerated   |       |
| p.Trp110Arg | VUS | -0.12  | Neutral       | 0.618  | Pathogenic | -5.19  | Benign     | 0.23 | Neutral | 1.00 | Probably damaging | 0.07 | Tolerated   | 18.20 |
| p.Trp110Ser | VUS | -1.65  | Neutral       | 0.4616 | Ambiguous  | -5.68  | Benign     | 0.24 | Neutral | 1.00 | Probably damaging | 0.16 | Tolerated   | 22.30 |
| p.Trp110Ile | VUS | -0.14  | Neutral       | 0.8704 | Pathogenic | -8.29  | Pathogenic | 0.47 | Neutral | 1.00 | Probably damaging | 0.03 | Deleterious |       |
| p.Trp110Met | VUS | -1.18  | Neutral       | 0.8504 | Pathogenic | -5.64  | Benign     | 0.48 | Neutral | 1.00 | Probably damaging | 0.02 | Deleterious |       |
| p.Trp110His | VUS | -4.10  | Neutral       | 0.5532 | Ambiguous  | -6.71  | Benign     | 0.45 | Neutral | 1.00 | Probably damaging | 0.06 | Tolerated   |       |
| p.Trp110Gln | VUS | -1.38  | Neutral       | 0.7159 | Pathogenic | -6.04  | Benign     | 0.31 | Neutral | 1.00 | Probably damaging | 0.25 | Tolerated   |       |
| p.Trp110Pro | VUS | -6.95  | Indeterminate | 0.9657 | Pathogenic | -9.39  | Pathogenic | 0.42 | Neutral | 1.00 | Probably damaging | 0.12 | Tolerated   |       |
| p.Trp110Leu | VUS | -0.06  | Neutral       | 0.6424 | Pathogenic | -4.43  | Benign     | 0.31 | Neutral | 1.00 | Probably damaging | 0.05 | Deleterious | 21.60 |
| p.Trp110Asp | VUS | -0.01  | Neutral       | 0.7311 | Pathogenic | -7.29  | Benign     | 0.29 | Neutral | 1.00 | Probably damaging | 0.54 | Tolerated   |       |
| p.Trp110Glu | VUS | -1.76  | Neutral       | 0.7096 | Pathogenic | -7.33  | Benign     | 0.32 | Neutral | 1.00 | Probably damaging | 1    | Tolerated   |       |
| p.Trp110Ala | VUS | -6.88  | Indeterminate | 0.5241 | Ambiguous  | -4.22  | Benign     | 0.29 | Neutral | 1.00 | Probably damaging | 0.21 | Tolerated   |       |
| p.Trp110Gly | VUS | -0.16  | Neutral       | 0.4853 | Ambiguous  | -5.73  | Benign     | 0.25 | Neutral | 0.38 | Benign            | 0.11 | Tolerated   | 18.78 |
| p.Trp110Val | VUS | -0.02  | Neutral       | 0.7336 | Pathogenic | -6.25  | Benign     | 0.45 | Neutral | 1.00 | Probably damaging | 0.06 | Tolerated   |       |
| p.Trp110Tyr | VUS | -0.11  | Neutral       | 0.368  | Ambiguous  | -6.32  | Benign     | 0.42 | Neutral | 1.00 | Probably damaging | 0.03 | Deleterious |       |
| p.Trp110Cys | VUS | -0.29  | Neutral       | 0.8142 | Pathogenic | -5.17  | Benign     | 0.45 | Neutral | 1.00 | Probably damaging | 0.01 | Deleterious | 25.85 |
| p.Trp110Phe | VUS | -0.03  | Neutral       | 0.2728 | Benign     | -2.04  | Benign     | 0.33 | Neutral | 1.00 | Probably damaging | 0.02 | Deleterious |       |
| p.Gly111Asn | VUS | -0.20  | Neutral       | 0.46   | Ambiguous  | -8.63  | Pathogenic | 0.34 | Neutral | 1.00 | Probably damaging | 0    | Deleterious |       |
| p.Gly111Lys | VUS | -4.17  | Neutral       | 0.8154 | Pathogenic | -13.08 | Pathogenic | 0.46 | Neutral | 1.00 | Probably damaging | 0    | Deleterious |       |
| p.Gly111Thr | VUS | -33.22 | Indeterminate | 0.774  | Pathogenic | -13.32 | Pathogenic | 0.   |         |      |                   |      |             |       |

|             |                   |        |               |        |            |        |            |      |         |      |                   |      |             |       |             |
|-------------|-------------------|--------|---------------|--------|------------|--------|------------|------|---------|------|-------------------|------|-------------|-------|-------------|
| p.Gly111Tyr | VUS               | -1.17  | Neutral       | 0.8014 | Pathogenic | -14.27 | Pathogenic | 0.66 | Disease | 1.00 | Probably damaging | 0    | Deleterious |       |             |
| p.Gly111Cys | VUS               | -0.80  | Neutral       | 0.6902 | Pathogenic | -11.37 | Pathogenic | 0.66 | Disease | 1.00 | Probably damaging | 0    | Deleterious | 32.00 | Deleterious |
| p.Gly111Trp | VUS               | -0.54  | Neutral       | 0.8024 | Pathogenic | -14.45 | Pathogenic | 0.69 | Disease | 1.00 | Probably damaging | 0    | Deleterious |       |             |
| p.Gly111Phe | VUS               | -0.47  | Neutral       | 0.9281 | Pathogenic | -15.88 | Pathogenic | 0.66 | Disease | 1.00 | Probably damaging | 0    | Deleterious |       |             |
| p.Arg112Asn | VUS               | -0.21  | Neutral       | 0.8545 | Pathogenic | -11.02 | Pathogenic | 0.34 | Neutral | 1.00 | Probably damaging | 0.9  | Tolerated   |       |             |
| p.Arg112Lys | VUS               | -2.10  | Neutral       | 0.4874 | Ambiguous  | -6.79  | Benign     | 0.50 | Neutral | 0.99 | Probably damaging | 0.92 | Tolerated   |       |             |
| p.Arg112Thr | VUS               | -0.24  | Neutral       | 0.8492 | Pathogenic | -12.48 | Pathogenic | 0.67 | Disease | 1.00 | Probably damaging | 0.46 | Tolerated   |       |             |
| p.Arg112Ser | VUS               | -0.35  | Neutral       | 0.8846 | Pathogenic | -11.11 | Pathogenic | 0.35 | Neutral | 1.00 | Probably damaging | 0.66 | Tolerated   | 27.30 | Deleterious |
| p.Arg112Ile | VUS               | -1.31  | Neutral       | 0.782  | Pathogenic | -15.13 | Pathogenic | 0.68 | Disease | 1.00 | Probably damaging | 0.14 | Tolerated   |       |             |
| p.Arg112Met | VUS               | -0.01  | Neutral       | 0.8234 | Pathogenic | -12.83 | Pathogenic | 0.67 | Disease | 1.00 | Probably damaging | 0.08 | Tolerated   |       |             |
| p.Arg112His | VUS               | -1.24  | Neutral       | 0.2973 | Benign     | -8.43  | Pathogenic | 0.32 | Neutral | 1.00 | Probably damaging | 0.12 | Tolerated   | 27.60 | Deleterious |
| p.Arg112Gln | VUS               | -2.70  | Neutral       | 0.2994 | Benign     | -9.10  | Pathogenic | 0.56 | Disease | 1.00 | Probably damaging | 0.47 | Tolerated   |       |             |
| p.Arg112Pro | VUS               | -53.15 | Deleterious   | 0.9671 | Pathogenic | -14.73 | Pathogenic | 0.76 | Disease | 1.00 | Probably damaging | 0.22 | Tolerated   | 32.00 | Deleterious |
| p.Arg112Leu | VUS               | -14.52 | Indeterminate | 0.5683 | Pathogenic | -10.93 | Pathogenic | 0.70 | Disease | 1.00 | Probably damaging | 0.24 | Tolerated   | 31.00 | Deleterious |
| p.Arg112Asp | VUS               | -7.02  | Indeterminate | 0.915  | Pathogenic | -13.50 | Pathogenic | 0.69 | Disease | 1.00 | Probably damaging | 0.7  | Tolerated   |       |             |
| p.Arg112Glu | VUS               | -15.47 | Indeterminate | 0.7571 | Pathogenic | -12.45 | Pathogenic | 0.61 | Disease | 1.00 | Probably damaging | 0.79 | Tolerated   |       |             |
| p.Arg112Ala | VUS               | -4.46  | Neutral       | 0.8545 | Pathogenic | -11.59 | Pathogenic | 0.35 | Neutral | 1.00 | Probably damaging | 0.71 | Tolerated   |       |             |
| p.Arg112Gly | Pathogenic        | -29.42 | Indeterminate | 0.7369 | Pathogenic | -11.75 | Pathogenic | 0.69 | Disease | 1.00 | Probably damaging | 0.35 | Tolerated   | 32.00 | Deleterious |
| p.Arg112Val | VUS               | -5.85  | Indeterminate | 0.7993 | Pathogenic | -13.18 | Pathogenic | 0.67 | Disease | 1.00 | Probably damaging | 0.22 | Tolerated   |       |             |
| p.Arg112Tyr | VUS               | -0.95  | Neutral       | 0.7175 | Pathogenic | -13.47 | Pathogenic | 0.61 | Disease | 0.99 | Probably damaging | 0.04 | Deleterious |       |             |
| p.Arg112Cys | VUS               | -16.03 | Indeterminate | 0.5496 | Ambiguous  | -10.16 | Pathogenic | 0.42 | Neutral | 1.00 | Probably damaging | 0.05 | Deleterious | 33.00 | Deleterious |
| p.Arg112Trp | VUS               | -1.48  | Neutral       | 0.4479 | Ambiguous  | -12.78 | Pathogenic | 0.69 | Disease | 1.00 | Probably damaging | 0.02 | Deleterious |       |             |
| p.Arg112Phe | VUS               | -4.69  | Neutral       | 0.8447 | Pathogenic | -14.05 | Pathogenic | 0.67 | Disease | 0.99 | Probably damaging | 0.04 | Deleterious |       |             |
| p.Leu113Asn | VUS               | -7.95  | Indeterminate | 0.4174 | Ambiguous  | -14.49 | Pathogenic | 0.66 | Disease | 1.00 | Probably damaging | 0.03 | Deleterious |       |             |
| p.Leu113Lys | VUS               | -0.38  | Neutral       | 0.1897 | Benign     | -11.50 | Pathogenic | 0.68 | Disease | 0.98 | Probably damaging | 0.03 | Deleterious |       |             |
| p.Leu113Thr | VUS               | -3.67  | Neutral       | 0.211  | Benign     | -5.96  | Benign     | 0.45 | Neutral | 1.00 | Probably damaging | 0.24 | Tolerated   |       |             |
| p.Leu113Arg | VUS               | -5.57  | Neutral       | 0.1019 | Benign     | -5.81  | Benign     | 0.45 | Neutral | 1.00 | Probably damaging | 0.02 | Deleterious | 23.30 | Deleterious |
| p.Leu113Ser | VUS               | -0.49  | Neutral       | 0.3002 | Benign     | -8.80  | Pathogenic | 0.69 | Disease | 1.00 | Probably damaging | 0.22 | Tolerated   |       |             |
| p.Leu113Ile | VUS               | -1.77  | Neutral       | 0.2739 | Benign     | -9.90  | Pathogenic | 0.49 | Neutral | 1.00 | Probably damaging | 0.13 | Tolerated   |       |             |
| p.Leu113Met | VUS               | -5.88  | Indeterminate | 0.1896 | Benign     | -6.39  | Benign     | 0.49 | Neutral | 1.00 | Probably damaging | 0.22 | Tolerated   | 26.00 | Deleterious |
| p.Leu113His | VUS               | -14.07 | Indeterminate | 0.2142 | Benign     | -10.56 | Pathogenic | 0.75 | Disease | 1.00 | Probably damaging | 0.01 | Deleterious |       |             |
| p.Leu113Gln | VUS               | -1.19  | Neutral       | 0.1148 | Benign     | -8.15  | Pathogenic | 0.47 | Neutral | 1.00 | Probably damaging | 0.03 | Deleterious | 26.40 | Deleterious |
| p.Leu113Pro | VUS               | -53.15 | Deleterious   | 0.4469 | Ambiguous  | -11.83 | Pathogenic | 0.80 | Disease | 1.00 | Probably damaging | 0.03 | Deleterious | 28.20 | Deleterious |
| p.Leu113Asp | VUS               | -1.75  | Neutral       | 0.6505 | Pathogenic | -13.75 | Pathogenic | 0.70 | Disease | 1.00 | Probably damaging | 0.02 | Deleterious |       |             |
| p.Leu113Glu | VUS               | -0.57  | Neutral       | 0.2218 | Benign     | -11.71 | Pathogenic | 0.68 | Disease | 1.00 | Probably damaging | 0.02 | Deleterious |       |             |
| p.Leu113Ala | VUS               | -22.19 | Indeterminate | 0.2436 | Benign     | -9.41  | Pathogenic | 0.65 | Disease | 1.00 | Probably damaging | 0.08 | Tolerated   |       |             |
| p.Leu113Gly | VUS               | -6.02  | Indeterminate | 0.4156 | Ambiguous  | -11.03 | Pathogenic | 0.69 | Disease | 1.00 | Probably damaging | 0.02 | Deleterious |       |             |
| p.Leu113Val | VUS               | -0.13  | Neutral       | 0.1729 | Benign     | -8.54  | Pathogenic | 0.52 | Disease | 0.99 | Probably damaging | 0.11 | Tolerated   | 25.20 | Deleterious |
| p.Leu113Tyr | VUS               | -2.67  | Neutral       | 0.2983 | Benign     | -11.35 | Pathogenic | 0.62 | Disease | 0.99 | Probably damaging | 0.02 | Deleterious |       |             |
| p.Leu113Cys | VUS               | -0.85  | Neutral       | 0.4819 | Ambiguous  | -9.89  | Pathogenic | 0.64 | Disease | 1.00 | Probably damaging | 0.02 | Deleterious |       |             |
| p.Leu113Trp | VUS               | -3.29  | Neutral       | 0.2657 | Benign     | -9.90  | Pathogenic | 0.69 | Disease | 1.00 | Probably damaging | 0.01 | Deleterious |       |             |
| p.Leu113Phe | VUS               | -13.98 | Indeterminate | 0.1755 | Benign     | -9.75  | Pathogenic | 0.55 | Disease | 1.00 | Probably damaging | 0.07 | Tolerated   |       |             |
| p.Pro114Asn | VUS               | -53.15 | Deleterious   | 0.995  | Pathogenic | -18.60 | Pathogenic | 0.89 | Disease | 1.00 | Probably damaging | 0    | Deleterious |       |             |
| p.Pro114Lys | VUS               | -53.15 | Deleterious   | 0.9972 | Pathogenic | -20.74 | Pathogenic | 0.92 | Disease | 1.00 | Probably damaging | 0    | Deleterious |       |             |
| p.Pro114Thr | Likely pathogenic | -53.15 | Deleterious   | 0.8814 | Pathogenic | -14.09 | Pathogenic | 0.93 | Disease | 1.00 | Probably damaging | 0    | Deleterious | 28.90 | Deleterious |
| p.Pro114Arg | VUS               | -53.15 | Deleterious   | 0.973  | Pathogenic | -15.01 | Pathogenic | 0.94 | Disease | 1.00 | Probably damaging | 0    | Deleterious | 31.00 | Deleterious |
| p.Pro114Ser | VUS               | -9.07  | Indeterminate | 0.8619 | Pathogenic | -9.87  | Pathogenic | 0.91 | Disease | 1.00 | Probably damaging | 0    | Deleterious | 29.90 | Deleterious |
| p.Pro114Ile | VUS               | -53.15 | Deleterious   | 0.9784 | Pathogenic | -19.22 | Pathogenic | 0.88 | Disease | 1.00 | Probably damaging | 0    | Deleterious |       |             |
| p.Pro114Met | VUS               | -53.15 | Deleterious   | 0.9889 | Pathogenic | -17.99 | Pathogenic | 0.91 | Disease | 1.00 | Probably damaging | 0    | Deleterious |       |             |
| p.Pro114His | Likely pathogenic | -53.15 | Deleterious   | 0.9886 | Pathogenic | -15.83 | Pathogenic | 0.91 | Disease | 1.00 | Probably damaging | 0    | Deleterious | 31.00 | Deleterious |
| p.Pro114Gln | VUS               | -53.15 | Deleterious   | 0.9769 | Pathogenic | -17.49 | Pathogenic | 0.90 | Disease | 1.00 | Probably damaging | 0    | Deleterious |       |             |
| p.Pro114Leu | VUS               | -53.15 | Deleterious   | 0.8805 | Pathogenic | -15.28 | Pathogenic | 0.93 | Disease | 1.00 | Probably damaging | 0    | Deleterious | 32.00 | Deleterious |
| p.Pro114Asp | VUS               | -53.15 | Deleterious   | 0.9963 | Pathogenic | -18.40 | Pathogenic | 0.91 | Disease | 1.00 | Probably damaging | 0    | Deleterious |       |             |
| p.Pro114Glu | VUS               | -53.15 | Deleterious   | 0.9878 | Pathogenic | -17.85 | Pathogenic | 0.87 | Disease | 1.00 | Probably damaging | 0    | Deleterious |       |             |
| p.Pro114Ala | VUS               | -8.63  | Indeterminate | 0.4367 | Ambiguous  | -5.69  | Benign     | 0.81 | Disease | 1.00 | Probably damaging | 0    | Deleterious | 27.90 | Deleterious |
| p.Pro114Gly | VUS               | -53.15 | Deleterious   | 0.9382 | Pathogenic | -11.20 | Pathogenic | 0.86 | Disease | 1.00 | Probably damaging | 0    | Deleterious |       |             |
| p.Pro114Val | VUS               | -32.81 | Indeterminate | 0.9005 | Pathogenic | -13.48 | Pathogenic | 0.85 | Disease | 1.00 | Probably damaging | 0    | Deleterious |       |             |
| p.Pro114Tyr | VUS               | -53.15 | Deleterious   | 0.9981 | Pathogenic | -18.72 | Pathogenic | 0.91 | Disease | 1.00 | Probably damaging | 0    | Deleterious |       |             |
| p.Pro114Cys | VUS               | -7.47  | Indeterminate | 0.9625 | Pathogenic | -10.61 | Pathogenic | 0.90 | Disease | 1.00 | Probably damaging | 0    | Deleterious |       |             |
| p.Pro114Trp | VUS               | -53.15 | Deleterious   | 0.9989 | Pathogenic | -17.70 | Pathogenic | 0.90 | Disease | 1.00 | Probably damaging | 0    | Deleterious |       |             |
| p.Pro114Phe | VUS               | -53.15 | Deleterious   | 0.9984 | Pathogenic | -16.89 | Pathogenic | 0.90 | Disease | 1.00 | Probably damaging | 0    | Deleterious |       |             |
| p.Val115Asn | VUS               | -2.41  | Neutral       | 0.5598 | Ambiguous  | -12.03 | Pathogenic | 0.69 | Disease | 1.00 | Probably damaging | 0.01 | Deleterious |       |             |
| p.Val115Lys | VUS               | -3.03  | Neutral       | 0.4431 | Ambiguous  | -9.06  | Pathogenic | 0.75 | Disease | 1.00 | Probably damaging | 0.01 | Deleterious |       |             |
| p.Val115Thr | VUS               | -1.57  | Neutral       | 0.2098 | Benign     | -6.92  | Benign     | 0.53 | Disease | 1.00 | Probably damaging | 0.03 | Deleterious |       |             |
| p.Val115Arg | VUS               | -21.93 | Indeterminate | 0.2736 | Benign     | -6.10  | Benign     | 0.75 | Disease | 1.00 | Probably damaging | 0.01 | Deleterious |       |             |
| p.Val115Ser | VUS               | -4.66  | Neutral       | 0.2381 | Benign     | -6.40  | Benign     | 0.62 | Disease | 1.00 | Probably damaging | 0.01 | Deleterious |       |             |
| p.Val115Ile | VUS               | -2.54  | Neutral       | 0.1129 | Benign     | -5.62  | Benign     | 0.11 | Neutral | 0.45 | Benign            | 0.72 | Tolerated   |       |             |
| p.Val115Met | VUS               | -1.44  | Neutral       | 0.2528 | Benign     | -7.13  | Benign     | 0.44 | Neutral | 1.00 | Probably damaging | 0.05 | Deleterious | 26.30 | Deleterious |
| p.Val115His | VUS               | -7.13  | Indeterminate | 0.6119 | Pathogenic | -8.48  | Pathogenic | 0.67 | Disease | 1.00 | Probably damaging | 0    | Deleterious |       |             |
| p.Val115Gln | VUS               | -19.06 | Indeterminate | 0.3317 | Benign     | -5.81  | Benign     | 0.68 | Disease | 1.00 | Probably damaging | 0.01 | Deleterious |       |             |
| p.Val115Pro | VUS               | -33.13 | Indeterminate | 0.5724 | Pathogenic | -9.79  | Pathogenic | 0.66 | Disease | 1.00 | Probably damaging | 0.01 | Deleterious |       |             |
| p.Val115Leu | VUS               | -2.89  | Neutral       | 0.2356 | Benign     | -5.26  | Benign     | 0.11 | Neutral | 0.01 | Benign            | 0.97 | Tolerated   | 22.20 | Deleterious |
| p.Val115Asp | VUS               | -9.37  | Indeterminate | 0.5529 | Ambiguous  | -10.51 | Pathogenic | 0.82 | Disease | 1.00 | Probably damaging | 0.01 | Deleterious |       |             |
| p.Val115Glu | VUS               | -9.20  | Indeterminate | 0.3085 | Benign     | -4.96  | Benign     | 0.78 | Disease | 1.00 | Probably damaging | 0.01 | Deleterious | 29.60 | Deleterious |
| p.Val115Ala | VUS               | -22.86 | Indeterminate | 0.1017 | Benign     | -2.70  | Benign     | 0.24 | Neutral | 1.00 | Probably damaging | 0.03 | Deleterious | 27.50 | Deleterious |
| p.Val115Gly | VUS               | -3.24  | Neutral       | 0.1657 | Benign     | -5.53  | Benign     | 0.59 | Disease | 1.00 | Probably damaging | 0.01 | Deleterious | 29.20 | Deleterious |
| p.Val115Tyr | VUS               | -2.24  | Neutral       | 0.6985 | Pathogenic | -11.15 | Pathogenic | 0.63 | Disease | 1.00 | Probably damaging | 0.25 | Tolerated   |       |             |
| p.Val115Cys | VUS               | -2.73  | Neutral       | 0.6361 | Pathogenic | -6.77  | Benign     | 0.59 | Disease | 1.00 | Probably damaging | 0.01 | Deleterious |       |             |
| p.Val115Trp | VUS               | -3.56  | Neutral       | 0.7798 | Pathogenic | -8.45  | Pathogenic | 0.59 | Disease | 1.00 | Probably damaging | 0.01 | Deleterious |       |             |
| p.Val115Phe | VUS               | -3.04  | Neutral       | 0.342  | Ambiguous  | -10.76 | Pathogenic | 0.65 | Disease | 0.99 | Probably damaging | 0.05 | Deleterious |       |             |
| p.Asp116Asn | VUS               | -3.49  | Neutral       | 0.4    | Ambiguous  | -10.46 | Pathogenic | 0.65 | Disease | 0.98 | Probably damaging | 0.59 | Tolerated   | 32.00 | Deleterious |
| p.Asp116Lys | VUS               | -0.50  | Neutral       | 0.8451 | Pathogenic | -11.20 | Pathogenic | 0.74 | Disease | 1.00 | Probably damaging | 0.18 | Tolerated   |       |             |
| p.Asp116Thr | VUS               | -5.85  | Indeterminate | 0.6412 | Pathogenic | -9.90  | Pathogenic | 0.70 | Disease | 0.96 | Probably damaging | 0.13 | Tolerated   |       |             |
| p.Asp116Arg | VUS               | -4.81  | Neutral       | 0.7232 | Pathogenic | -8.52  | Pathogenic | 0.73 | Disease | 1.00 | Probably damaging | 0.09 | Tolerated   |       |             |
| p.Asp116Ser | VUS               | -1.21  | Neutral       | 0.4038 | Ambiguous  | -9.67  | Pathogenic | 0.64 | Disease | 1.00 | Probably damaging | 0.29 | Tolerated   |       |             |
| p.Asp116Ile | VUS               | -3.94  | Neutral       | 0.8019 | Pathogenic | -13.22 | Pathogenic | 0.69 | Disease | 0.45 | Benign            | 0.02 | Deleterious |       |             |
| p.Asp116Met | VUS               | -0.33  | Neutral       | 0.8692 | Pathogenic | -10.86 | Pathogenic | 0.70 | Disease | 1.00 | Probably damaging | 0.01 | Deleterious |       |             |
| p.Asp116His | VUS               | -1.16  | Neutral       | 0.3546 | Ambiguous  | -8.67  | Pathogenic | 0.30 | Neutral | 1.00 | Probably damaging | 0.49 | Tolerated   | 25.20 | Deleterious |
| p.Asp116Gln | VUS               | -1.92  | Neutral       | 0.5174 | Ambiguous  | -5.49  | Benign     | 0.64 | Disease | 1.00 | Probably damaging | 0.14 | Tolerated   |       |             |
| p.Asp116Pro | VUS               | -53.15 | Deleterious   | 0.9689 | Pathogenic | -13.02 | Pathogenic | 0.70 | Disease | 0.92 | Possibly damaging | 0.11 | Tolerated   |       |             |
| p.Asp116Leu | VUS               | -2.83  | Neutral       | 0.6897 | Pathogenic | -10.07 | Pathogenic | 0.71 | Disease | 0.93 | Possibly damaging | 0.04 | Deleterious |       |             |
| p.Asp116Glu | VUS               | -1.73  | Neutral       | 0.319  | Benign     | -4.80  | Benign     | 0.28 | Neutral | 0.79 | Possibly damaging | 0.32 | Tolerated   | 24.95 | Deleterious |
| p.Asp116Ala | VUS               | -2.29  | Neutral       | 0.4161 | Ambiguous  | -7.45  | Benign     | 0.75 | Disease | 0.97 | Probably damaging | 0.14 | Tolerated   | 32.00 | Deleterious |
| p.Asp116Gly | VUS               | -7.40  | Indeterminate | 0.5678 | Pathogenic | -8.44  | Pathogenic | 0.77 | Disease | 1.00 | Probably damaging | 0.37 | Tolerated   | 32.00 | Deleterious |
| p.Asp116Val | VUS               | -2.63  | Neutral       | 0.5947 | Pathogenic | -9.75  | Pathogenic | 0.77 | Disease | 0.63 | Possibly          |      |             |       |             |

|             |     |        |               |        |            |        |            |      |         |      |                   |      |             |       |             |
|-------------|-----|--------|---------------|--------|------------|--------|------------|------|---------|------|-------------------|------|-------------|-------|-------------|
| p.Leu17Ala  | VUS | -3.34  | Neutral       | 0.6184 | Pathogenic | -7.30  | Benign     | 0.64 | Disease | 1.00 | Probably damaging | 0.01 | Deleterious |       |             |
| p.Leu17Gly  | VUS | -1.70  | Neutral       | 0.8729 | Pathogenic | -10.95 | Pathogenic | 0.71 | Disease | 1.00 | Probably damaging | 0    | Deleterious |       |             |
| p.Leu17Val  | VUS | -1.09  | Neutral       | 0.1608 | Benign     | -5.80  | Benign     | 0.18 | Neutral | 1.00 | Probably damaging | 0.02 | Deleterious | 23.80 | Deleterious |
| p.Leu17Tyr  | VUS | -0.42  | Neutral       | 0.7173 | Pathogenic | -10.15 | Pathogenic | 0.63 | Disease | 1.00 | Probably damaging | 0    | Deleterious |       |             |
| p.Leu17Cys  | VUS | -2.13  | Neutral       | 0.8485 | Pathogenic | -9.32  | Pathogenic | 0.65 | Disease | 1.00 | Probably damaging | 0    | Deleterious |       |             |
| p.Leu17Trp  | VUS | -1.72  | Neutral       | 0.6017 | Pathogenic | -6.36  | Benign     | 0.71 | Disease | 1.00 | Probably damaging | 0    | Deleterious |       |             |
| p.Leu17Phe  | VUS | -1.86  | Neutral       | 0.4215 | Ambiguous  | -9.89  | Pathogenic | 0.51 | Disease | 1.00 | Probably damaging | 0.02 | Deleterious |       |             |
| p.Ala18Asn  | VUS | -32.02 | Indeterminate | 0.9907 | Pathogenic | -18.64 | Pathogenic | 0.85 | Disease | 1.00 | Probably damaging | 0.01 | Deleterious |       |             |
| p.Ala18Lys  | VUS | -33.22 | Indeterminate | 0.9948 | Pathogenic | -19.83 | Pathogenic | 0.89 | Disease | 1.00 | Probably damaging | 0.01 | Deleterious |       |             |
| p.Ala18Thr  | VUS | -4.89  | Neutral       | 0.8464 | Pathogenic | -12.28 | Pathogenic | 0.90 | Disease | 1.00 | Probably damaging | 0.02 | Deleterious | 32.00 | Deleterious |
| p.Ala18Arg  | VUS | -27.39 | Indeterminate | 0.9534 | Pathogenic | -15.22 | Pathogenic | 0.87 | Disease | 1.00 | Probably damaging | 0.01 | Deleterious |       |             |
| p.Ala18Ser  | VUS | -6.37  | Indeterminate | 0.418  | Ambiguous  | -10.49 | Pathogenic | 0.80 | Disease | 0.97 | Probably damaging | 0.04 | Deleterious | 29.80 | Deleterious |
| p.Ala18Ile  | VUS | -12.28 | Indeterminate | 0.9817 | Pathogenic | -17.46 | Pathogenic | 0.89 | Disease | 1.00 | Probably damaging | 0.01 | Deleterious |       |             |
| p.Ala18Met  | VUS | -26.26 | Indeterminate | 0.9763 | Pathogenic | -17.51 | Pathogenic | 0.83 | Disease | 1.00 | Probably damaging | 0    | Deleterious |       |             |
| p.Ala18His  | VUS | -33.22 | Indeterminate | 0.9896 | Pathogenic | -18.95 | Pathogenic | 0.87 | Disease | 1.00 | Probably damaging | 0    | Deleterious |       |             |
| p.Ala18Gln  | VUS | -29.56 | Indeterminate | 0.966  | Pathogenic | -18.83 | Pathogenic | 0.89 | Disease | 1.00 | Probably damaging | 0.01 | Deleterious |       |             |
| p.Ala18Pro  | VUS | -33.04 | Indeterminate | 0.92   | Pathogenic | -13.05 | Pathogenic | 0.90 | Disease | 1.00 | Probably damaging | 0.02 | Deleterious | 31.00 | Deleterious |
| p.Ala18Leu  | VUS | -10.18 | Indeterminate | 0.8613 | Pathogenic | -16.67 | Pathogenic | 0.85 | Disease | 1.00 | Probably damaging | 0.01 | Deleterious |       |             |
| p.Ala18Asp  | VUS | -28.32 | Indeterminate | 0.98   | Pathogenic | -16.04 | Pathogenic | 0.94 | Disease | 1.00 | Probably damaging | 0.01 | Deleterious | 32.00 | Deleterious |
| p.Ala18Glu  | VUS | -31.29 | Indeterminate | 0.9708 | Pathogenic | -16.79 | Pathogenic | 0.91 | Disease | 1.00 | Probably damaging | 0.01 | Deleterious |       |             |
| p.Ala18Gly  | VUS | -2.90  | Neutral       | 0.3954 | Ambiguous  | -10.74 | Pathogenic | 0.82 | Disease | 1.00 | Probably damaging | 0.05 | Deleterious | 32.00 | Deleterious |
| p.Ala18Val  | VUS | -6.66  | Indeterminate | 0.8495 | Pathogenic | -12.26 | Pathogenic | 0.85 | Disease | 1.00 | Probably damaging | 0.02 | Deleterious | 32.00 | Deleterious |
| p.Ala18Tyr  | VUS | -32.85 | Indeterminate | 0.9941 | Pathogenic | -19.07 | Pathogenic | 0.89 | Disease | 1.00 | Probably damaging | 0    | Deleterious |       |             |
| p.Ala18Cys  | VUS | -2.10  | Neutral       | 0.8877 | Pathogenic | -12.96 | Pathogenic | 0.80 | Disease | 1.00 | Probably damaging | 0.16 | Tolerated   |       |             |
| p.Ala18Trp  | VUS | -33.22 | Indeterminate | 0.9968 | Pathogenic | -19.92 | Pathogenic | 0.90 | Disease | 1.00 | Probably damaging | 0    | Deleterious |       |             |
| p.Ala18Phe  | VUS | -31.19 | Indeterminate | 0.9903 | Pathogenic | -19.66 | Pathogenic | 0.89 | Disease | 1.00 | Probably damaging | 0    | Deleterious |       |             |
| p.Glu19Asn  | VUS | -1.46  | Neutral       | 0.5101 | Ambiguous  | -10.85 | Pathogenic | 0.39 | Neutral | 1.00 | Probably damaging | 0.29 | Tolerated   |       |             |
| p.Glu19Lys  | VUS | -0.30  | Neutral       | 0.2273 | Benign     | -9.38  | Pathogenic | 0.25 | Neutral | 1.00 | Probably damaging | 0.55 | Tolerated   | 19.51 | Deleterious |
| p.Glu19Thr  | VUS | -0.06  | Neutral       | 0.294  | Benign     | -7.87  | Pathogenic | 0.42 | Neutral | 1.00 | Probably damaging | 0.57 | Tolerated   |       |             |
| p.Glu19Arg  | VUS | -10.02 | Indeterminate | 0.1837 | Benign     | -7.03  | Benign     | 0.25 | Neutral | 1.00 | Probably damaging | 0.32 | Tolerated   |       |             |
| p.Glu19Ser  | VUS | 0.00   | Neutral       | 0.3272 | Benign     | -9.06  | Pathogenic | 0.43 | Neutral | 1.00 | Probably damaging | 0.45 | Tolerated   |       |             |
| p.Glu19Ile  | VUS | -0.05  | Neutral       | 0.5279 | Ambiguous  | -9.42  | Pathogenic | 0.31 | Neutral | 1.00 | Probably damaging | 0.51 | Tolerated   |       |             |
| p.Glu19Met  | VUS | -4.89  | Neutral       | 0.5649 | Pathogenic | -9.59  | Pathogenic | 0.49 | Neutral | 1.00 | Probably damaging | 0.15 | Tolerated   |       |             |
| p.Glu19His  | VUS | -30.83 | Indeterminate | 0.453  | Ambiguous  | -9.34  | Pathogenic | 0.42 | Neutral | 1.00 | Probably damaging | 0.11 | Tolerated   |       |             |
| p.Glu19Gln  | VUS | -23.79 | Indeterminate | 0.1483 | Benign     | -6.81  | Benign     | 0.17 | Neutral | 0.99 | Probably damaging | 0.37 | Tolerated   | 17.96 | Deleterious |
| p.Glu19Pro  | VUS | -33.21 | Indeterminate | 0.945  | Pathogenic | -13.45 | Pathogenic | 0.47 | Neutral | 1.00 | Probably damaging | 0.23 | Tolerated   |       |             |
| p.Glu19Leu  | VUS | -1.13  | Neutral       | 0.3708 | Ambiguous  | -8.04  | Pathogenic | 0.29 | Neutral | 1.00 | Probably damaging | 0.49 | Tolerated   |       |             |
| p.Glu19Asp  | VUS | -9.98  | Indeterminate | 0.2843 | Benign     | -7.45  | Benign     | 0.33 | Neutral | 0.99 | Probably damaging | 0.37 | Tolerated   | 15.22 | Deleterious |
| p.Glu19Ala  | VUS | -0.01  | Neutral       | 0.1304 | Benign     | -6.79  | Benign     | 0.16 | Neutral | 1.00 | Probably damaging | 0.84 | Tolerated   | 18.66 | Deleterious |
| p.Glu19Gly  | VUS | -0.65  | Neutral       | 0.1783 | Benign     | -8.90  | Pathogenic | 0.25 | Neutral | 1.00 | Probably damaging | 0.22 | Tolerated   | 22.20 | Deleterious |
| p.Glu19Val  | VUS | -5.91  | Indeterminate | 0.2797 | Benign     | -6.98  | Benign     | 0.22 | Neutral | 1.00 | Probably damaging | 1    | Tolerated   | 21.70 | Deleterious |
| p.Glu19Tyr  | VUS | 0.00   | Neutral       | 0.6978 | Pathogenic | -12.23 | Pathogenic | 0.42 | Neutral | 1.00 | Probably damaging | 0.1  | Tolerated   |       |             |
| p.Glu19Cys  | VUS | 0.00   | Neutral       | 0.8272 | Pathogenic | -10.09 | Pathogenic | 0.44 | Neutral | 1.00 | Probably damaging | 0.11 | Tolerated   |       |             |
| p.Glu19Trp  | VUS | -31.32 | Indeterminate | 0.8444 | Pathogenic | -11.54 | Pathogenic | 0.49 | Neutral | 1.00 | Probably damaging | 0.03 | Deleterious |       |             |
| p.Glu19Phe  | VUS | -33.21 | Indeterminate | 0.733  | Pathogenic | -12.37 | Pathogenic | 0.43 | Neutral | 1.00 | Probably damaging | 0.12 | Tolerated   |       |             |
| p.Glu20Asn  | VUS | -1.82  | Neutral       | 0.6455 | Pathogenic | -8.71  | Pathogenic | 0.46 | Neutral | 1.00 | Probably damaging | 0.2  | Tolerated   |       |             |
| p.Glu20Lys  | VUS | -1.90  | Neutral       | 0.5939 | Pathogenic | -7.47  | Benign     | 0.53 | Disease | 0.79 | Possibly damaging | 0.54 | Tolerated   | 24.20 | Deleterious |
| p.Glu20Thr  | VUS | -1.40  | Neutral       | 0.4767 | Ambiguous  | -6.27  | Benign     | 0.50 | Neutral | 1.00 | Probably damaging | 0.24 | Tolerated   |       |             |
| p.Glu20Arg  | VUS | -5.70  | Neutral       | 0.4604 | Ambiguous  | -6.28  | Benign     | 0.46 | Neutral | 0.91 | Possibly damaging | 0.3  | Tolerated   |       |             |
| p.Glu20Ser  | VUS | -1.67  | Neutral       | 0.4157 | Ambiguous  | -5.36  | Benign     | 0.46 | Neutral | 0.99 | Probably damaging | 0.3  | Tolerated   |       |             |
| p.Glu20Ile  | VUS | -5.03  | Neutral       | 0.6566 | Pathogenic | -7.99  | Pathogenic | 0.49 | Neutral | 0.99 | Probably damaging | 0.19 | Tolerated   |       |             |
| p.Glu20Met  | VUS | -12.94 | Indeterminate | 0.7051 | Pathogenic | -6.86  | Benign     | 0.55 | Disease | 0.99 | Probably damaging | 0.04 | Deleterious |       |             |
| p.Glu20His  | VUS | -2.96  | Neutral       | 0.6129 | Pathogenic | -6.68  | Benign     | 0.46 | Neutral | 0.98 | Probably damaging | 0.06 | Tolerated   |       |             |
| p.Glu20Gln  | VUS | -4.15  | Neutral       | 0.2187 | Benign     | -3.82  | Benign     | 0.28 | Neutral | 0.17 | Benign            | 0.31 | Tolerated   | 21.90 | Deleterious |
| p.Glu20Pro  | VUS | -4.57  | Neutral       | 0.9068 | Pathogenic | -10.42 | Pathogenic | 0.56 | Disease | 1.00 | Probably damaging | 0.12 | Tolerated   |       |             |
| p.Glu20Leu  | VUS | -1.27  | Neutral       | 0.6466 | Pathogenic | -6.07  | Benign     | 0.50 | Neutral | 0.94 | Possibly damaging | 0.13 | Tolerated   |       |             |
| p.Glu20Asp  | VUS | -2.28  | Neutral       | 0.2992 | Benign     | -5.91  | Benign     | 0.26 | Neutral | 0.75 | Possibly damaging | 0.45 | Tolerated   | 21.85 | Deleterious |
| p.Glu20Ala  | VUS | -0.79  | Neutral       | 0.2356 | Benign     | -4.11  | Benign     | 0.30 | Neutral | 0.96 | Possibly damaging | 0.32 | Tolerated   | 22.90 | Deleterious |
| p.Glu20Gly  | VUS | -1.95  | Neutral       | 0.3373 | Benign     | -6.30  | Benign     | 0.46 | Neutral | 1.00 | Probably damaging | 0.16 | Tolerated   | 25.20 | Deleterious |
| p.Glu20Val  | VUS | -1.61  | Neutral       | 0.482  | Ambiguous  | -6.19  | Benign     | 0.50 | Disease | 0.95 | Possibly damaging | 0.12 | Tolerated   | 26.50 | Deleterious |
| p.Glu20Tyr  | VUS | -11.75 | Indeterminate | 0.7664 | Pathogenic | -8.90  | Pathogenic | 0.49 | Neutral | 1.00 | Probably damaging | 0.02 | Deleterious |       |             |
| p.Glu20Cys  | VUS | -1.14  | Neutral       | 0.9161 | Pathogenic | -8.29  | Pathogenic | 0.54 | Disease | 1.00 | Probably damaging | 0.02 | Deleterious |       |             |
| p.Glu20Trp  | VUS | -2.61  | Neutral       | 0.9213 | Pathogenic | -10.28 | Pathogenic | 0.43 | Neutral | 1.00 | Probably damaging | 0.01 | Deleterious |       |             |
| p.Glu20Phe  | VUS | -0.12  | Neutral       | 0.8696 | Pathogenic | -9.00  | Pathogenic | 0.52 | Disease | 1.00 | Probably damaging | 0.02 | Deleterious |       |             |
| p.Leu21Asn  | VUS | -4.57  | Neutral       | 0.2029 | Benign     | 0.79   | Benign     | 0.18 | Neutral | 0.05 | Benign            | 0.38 | Tolerated   |       |             |
| p.Leu21Lys  | VUS | -1.77  | Neutral       | 0.147  | Benign     | -2.38  | Benign     | 0.20 | Neutral | 0.00 | Benign            | 0.79 | Tolerated   |       |             |
| p.Leu21Thr  | VUS | -1.63  | Neutral       | 0.1938 | Benign     | -4.38  | Benign     | 0.24 | Neutral | 0.01 | Benign            | 0.47 | Tolerated   |       |             |
| p.Leu21Arg  | VUS | -12.00 | Indeterminate | 0.0651 | Benign     | 1.68   | Benign     | 0.11 | Neutral | 0.00 | Benign            | 0.85 | Tolerated   | 11.52 | Neutral     |
| p.Leu21Ser  | VUS | -2.80  | Neutral       | 0.2532 | Benign     | -0.34  | Benign     | 0.09 | Neutral | 0.02 | Benign            | 0.48 | Tolerated   |       |             |
| p.Leu21Ile  | VUS | -1.47  | Neutral       | 0.19   | Benign     | -8.56  | Pathogenic | 0.18 | Neutral | 0.00 | Benign            | 0.4  | Tolerated   |       |             |
| p.Leu21Met  | VUS | -53.15 | Deleterious   | 0.1454 | Benign     | -5.63  | Benign     | 0.22 | Neutral | 0.00 | Benign            | 0.23 | Tolerated   | 21.30 | Deleterious |
| p.Leu21His  | VUS | -0.28  | Neutral       | 0.1246 | Benign     | 0.35   | Benign     | 0.15 | Neutral | 0.18 | Benign            | 0.64 | Tolerated   |       |             |
| p.Leu21Gln  | VUS | -1.06  | Neutral       | 0.0787 | Benign     | -1.63  | Benign     | 0.11 | Neutral | 0.00 | Benign            | 0.55 | Tolerated   | 13.36 | Neutral     |
| p.Leu21Pro  | VUS | -0.56  | Neutral       | 0.7069 | Pathogenic | -7.54  | Pathogenic | 0.23 | Neutral | 0.07 | Benign            | 0.26 | Tolerated   | 14.80 | Neutral     |
| p.Leu21Asp  | VUS | 0.00   | Neutral       | 0.4718 | Ambiguous  | -5.15  | Benign     | 0.29 | Neutral | 0.05 | Benign            | 0.27 | Tolerated   |       |             |
| p.Leu21Glu  | VUS | -3.77  | Neutral       | 0.1833 | Benign     | -2.75  | Benign     | 0.18 | Neutral | 0.01 | Benign            | 0.76 | Tolerated   |       |             |
| p.Leu21Ala  | VUS | -2.68  | Neutral       | 0.1338 | Benign     | -0.09  | Benign     | 0.22 | Neutral | 0.01 | Benign            | 0.59 | Tolerated   |       |             |
| p.Leu21Gly  | VUS | -3.55  | Neutral       | 0.168  | Benign     | -0.18  | Benign     | 0.15 | Neutral | 0.02 | Benign            | 0.38 | Tolerated   |       |             |
| p.Leu21Val  | VUS | -0.04  | Neutral       | 0.1629 | Benign     | -5.47  | Benign     | 0.14 | Neutral | 0.00 | Benign            | 0.51 | Tolerated   | 17.90 | Deleterious |
| p.Leu21Tyr  | VUS | -0.11  | Neutral       | 0.2306 | Benign     | -1.88  | Benign     | 0.24 | Neutral | 0.00 | Benign            | 1    | Tolerated   |       |             |
| p.Leu21Cys  | VUS | -0.25  | Neutral       | 0.2808 | Benign     | -0.78  | Benign     | 0.25 | Neutral | 0.56 | Possibly damaging | 0.17 | Tolerated   |       |             |
| p.Leu21Trp  | VUS | -3.11  | Neutral       | 0.1596 | Benign     | -5.17  | Benign     | 0.26 | Neutral | 0.26 | Benign            | 0.18 | Tolerated   |       |             |
| p.Leu21Phe  | VUS | -0.56  | Neutral       | 0.1576 | Benign     | -2.40  | Benign     | 0.12 | Neutral | 0.00 | Benign            | 0.65 | Tolerated   |       |             |
| p.Gly122Asn | VUS | -0.06  | Neutral       | 0.6676 | Pathogenic | -9.46  | Pathogenic | 0.41 | Neutral | 1.00 | Probably damaging | 0.27 | Tolerated   |       |             |
| p.Gly122Lys | VUS | -0.45  | Neutral       | 0.8542 | Pathogenic | -8.95  | Pathogenic | 0.64 | Disease | 1.00 | Probably damaging | 0.05 | Deleterious |       |             |
| p.Gly122Thr | VUS | -0.11  | Neutral       | 0.7899 | Pathogenic | -9.54  | Pathogenic | 0.43 | Neutral | 1.00 | Probably damaging | 0.04 | Deleterious |       |             |
| p.Gly122Arg | VUS | -2.36  | Neutral       | 0.6425 | Pathogenic | -6.20  | Benign     | 0.66 | Disease | 1.00 | Probably damaging | 0.03 | Deleterious | 25.80 | Deleterious |
| p.Gly122Ser | VUS | -0.02  | Neutral       | 0.4055 | Ambiguous  | -8.12  | Pathogenic | 0.55 | Disease | 1.00 | Probably damaging | 0.1  | Tolerated   | 25.80 | Deleterious |
| p.Gly122Ile | VUS | -3.72  | Neutral       | 0.9444 | Pathogenic | -12.62 | Pathogenic | 0.68 | Disease | 1.00 | Probably damaging | 0.01 | Deleterious |       |             |
| p.Gly122Met | VUS | -0.24  | Neutral       | 0.9514 | Pathogenic | -6.51  | Benign     | 0.68 | Disease | 1.00 | Probably damaging | 0    | Deleterious |       |             |
| p.Gly122His | VUS | -0.06  | Neutral       | 0.7213 | Pathogenic | -7.17  | Benign     | 0.62 | Disease | 1.00 | Probably damaging | 0.03 | Deleterious |       |             |
| p.Gly122Gln | VUS | -0.10  | Neutral       | 0.6852 | Pathogenic | -6.15  | Benign     | 0.59 | Disease | 1.00 | Probably damaging | 0.03 | Deleterious |       |             |
| p.Gly122Pro | VUS | -1.75  | Neutral       | 0.972  | Pathogenic | -10.91 | Pathogenic | 0.43 | Neutral | 1.00 | Probably damaging | 0.19 | Tolerated   |       |             |
| p.Gly122Leu | VUS | -0.96  | Neutral       | 0.8733 | Pathogenic | -4.19  | Benign     | 0.66 | Disease | 1.00 | Probably damaging | 0.01 | Deleterious |       |             |
| p.Gly122Asp | VUS | -0.29  | Neutral       | 0.4509 | Ambiguous  | -8.31  | Pathogenic | 0.66 | Disease | 1.00 | Probably damaging | 0.14 | Tolerated   | 25.50 | Deleterious |
| p.Gly122Glu | VUS | -0.41  | Neutral       | 0.6464 | Pathogenic | -7.32  | Benign     | 0.   |         |      |                   |      |             |       |             |

|             |               |        |               |        |            |        |            |      |         |      |                   |      |             |       |               |
|-------------|---------------|--------|---------------|--------|------------|--------|------------|------|---------|------|-------------------|------|-------------|-------|---------------|
| p.His123Leu | VUS           | -8.40  | Indeterminate | 0.5414 | Ambiguous  | -11.64 | Pathogenic | 0.77 | Disease | 1.00 | Probably damaging | 0.04 | Deleterious | 25.20 | Deleterious   |
| p.His123Asp | VUS           | -19.23 | Indeterminate | 0.8124 | Pathogenic | -12.97 | Pathogenic | 0.75 | Disease | 1.00 | Probably damaging | 0.1  | Tolerated   | 25.60 | Deleterious   |
| p.His123Glu | VUS           | -16.55 | Indeterminate | 0.8202 | Pathogenic | -11.12 | Pathogenic | 0.64 | Disease | 1.00 | Probably damaging | 0.06 | Tolerated   |       |               |
| p.His123Ala | VUS           | -5.96  | Indeterminate | 0.8083 | Pathogenic | -11.49 | Pathogenic | 0.69 | Disease | 1.00 | Probably damaging | 0.09 | Tolerated   |       |               |
| p.His123Gly | VUS           | -53.15 | Deleterious   | 0.8408 | Pathogenic | -12.93 | Pathogenic | 0.71 | Disease | 1.00 | Probably damaging | 0.09 | Tolerated   |       |               |
| p.His123Val | VUS           | -27.77 | Indeterminate | 0.8496 | Pathogenic | -15.85 | Pathogenic | 0.72 | Disease | 1.00 | Probably damaging | 0.05 | Deleterious |       |               |
| p.His123Tyr | VUS           | -0.91  | Neutral       | 0.2345 | Benign     | -9.44  | Pathogenic | 0.69 | Disease | 1.00 | Probably damaging | 0.03 | Deleterious | 25.50 | Deleterious   |
| p.His123Cys | VUS           | -1.67  | Neutral       | 0.4191 | Ambiguous  | -11.97 | Pathogenic | 0.46 | Neutral | 1.00 | Probably damaging | 0.02 | Deleterious |       |               |
| p.His123Trp | VUS           | -0.86  | Neutral       | 0.5355 | Ambiguous  | -10.89 | Pathogenic | 0.71 | Disease | 1.00 | Probably damaging | 0.01 | Deleterious |       |               |
| p.His123Phe | VUS           | -24.07 | Indeterminate | 0.5384 | Ambiguous  | -10.33 | Pathogenic | 0.71 | Disease | 1.00 | Probably damaging | 0.02 | Deleterious |       |               |
| p.Arg124Asn | VUS           | -0.04  | Neutral       | 0.3597 | Ambiguous  | -8.79  | Pathogenic | 0.39 | Neutral | 0.82 | Possibly damaging | 0.5  | Tolerated   |       |               |
| p.Arg124Lys | VUS           | -0.74  | Neutral       | 0.1647 | Benign     | -6.83  | Benign     | 0.23 | Neutral | 0.18 | Benign            | 1    | Tolerated   |       |               |
| p.Arg124Thr | VUS           | -8.50  | Indeterminate | 0.1369 | Benign     | -7.10  | Benign     | 0.21 | Neutral | 0.82 | Possibly damaging | 0.59 | Tolerated   |       |               |
| p.Arg124Ser | VUS           | -0.05  | Neutral       | 0.211  | Benign     | -7.20  | Benign     | 0.18 | Neutral | 0.97 | Probably damaging | 0.72 | Tolerated   | 6.28  | Neutral       |
| p.Arg124Ile | VUS           | -32.97 | Indeterminate | 0.2337 | Benign     | -10.01 | Pathogenic | 0.38 | Neutral | 0.99 | Probably damaging | 0.24 | Tolerated   |       |               |
| p.Arg124Met | VUS           | -0.21  | Neutral       | 0.3405 | Ambiguous  | -9.58  | Pathogenic | 0.37 | Neutral | 0.94 | Possibly damaging | 0.14 | Tolerated   |       |               |
| p.Arg124His | VUS           | -0.31  | Neutral       | 0.1059 | Benign     | -6.32  | Benign     | 0.10 | Neutral | 0.01 | Benign            | 0.23 | Tolerated   | 11.48 | Neutral       |
| p.Arg124Gln | VUS           | -0.20  | Neutral       | 0.1057 | Benign     | -6.73  | Benign     | 0.12 | Neutral | 0.87 | Possibly damaging | 0.61 | Tolerated   |       |               |
| p.Arg124Pro | VUS           | -0.31  | Neutral       | 0.1531 | Benign     | -8.06  | Pathogenic | 0.42 | Neutral | 1.00 | Probably damaging | 0.29 | Tolerated   | 16.31 | Deleterious   |
| p.Arg124Leu | VUS           | -0.46  | Neutral       | 0.1291 | Benign     | -7.80  | Pathogenic | 0.16 | Neutral | 0.96 | Possibly damaging | 0.41 | Tolerated   | 10.34 | Neutral       |
| p.Arg124Asp | VUS           | -0.04  | Neutral       | 0.2316 | Benign     | -6.81  | Benign     | 0.29 | Neutral | 0.98 | Possibly damaging | 0.58 | Tolerated   |       |               |
| p.Arg124Glu | VUS           | -0.26  | Neutral       | 0.1569 | Benign     | -6.75  | Benign     | 0.36 | Neutral | 0.58 | Possibly damaging | 0.94 | Tolerated   |       |               |
| p.Arg124Ala | VUS           | -0.23  | Neutral       | 0.118  | Benign     | -6.06  | Benign     | 0.27 | Neutral | 0.48 | Possibly damaging | 0.76 | Tolerated   |       |               |
| p.Arg124Gly | VUS           | -11.05 | Indeterminate | 0.0959 | Benign     | -6.10  | Benign     | 0.11 | Neutral | 0.05 | Benign            | 0.4  | Tolerated   | 6.52  | Neutral       |
| p.Arg124Val | VUS           | -1.45  | Neutral       | 0.1826 | Benign     | -7.60  | Pathogenic | 0.27 | Neutral | 0.89 | Possibly damaging | 0.35 | Tolerated   |       |               |
| p.Arg124Tyr | VUS           | -15.60 | Indeterminate | 0.3596 | Ambiguous  | -10.13 | Pathogenic | 0.36 | Neutral | 0.31 | Benign            | 0.23 | Tolerated   |       |               |
| p.Arg124Cys | VUS           | -1.37  | Neutral       | 0.2354 | Benign     | -9.11  | Pathogenic | 0.17 | Neutral | 0.63 | Possibly damaging | 0.08 | Tolerated   | 12.16 | Neutral       |
| p.Arg124Trp | VUS           | -0.21  | Neutral       | 0.1848 | Benign     | -8.64  | Pathogenic | 0.19 | Neutral | 0.98 | Probably damaging | 0.05 | Deleterious |       |               |
| p.Arg124Phe | VUS           | -0.13  | Neutral       | 0.3872 | Ambiguous  | -10.36 | Pathogenic | 0.40 | Neutral | 0.47 | Possibly damaging | 0.18 | Tolerated   |       |               |
| p.Asp125Asn | VUS           | -0.69  | Neutral       | 0.238  | Benign     | -6.08  | Benign     | 0.41 | Neutral | 0.11 | Benign            | 0.27 | Tolerated   | 15.76 | Deleterious   |
| p.Asp125Lys | VUS           | -0.03  | Neutral       | 0.4591 | Ambiguous  | -8.56  | Pathogenic | 0.47 | Neutral | 0.19 | Benign            | 0.47 | Tolerated   |       |               |
| p.Asp125Thr | VUS           | 0.00   | Neutral       | 0.3727 | Ambiguous  | -6.64  | Benign     | 0.45 | Neutral | 0.06 | Benign            | 0.31 | Tolerated   |       |               |
| p.Asp125Arg | VUS           | -0.24  | Neutral       | 0.3515 | Ambiguous  | -6.43  | Benign     | 0.45 | Neutral | 0.62 | Possibly damaging | 0.35 | Tolerated   |       |               |
| p.Asp125Ser | VUS           | -0.29  | Neutral       | 0.2393 | Benign     | -5.78  | Benign     | 0.39 | Neutral | 0.27 | Benign            | 0.49 | Tolerated   |       |               |
| p.Asp125Ile | VUS           | 0.00   | Neutral       | 0.6176 | Pathogenic | -10.50 | Pathogenic | 0.50 | Neutral | 0.77 | Possibly damaging | 0.1  | Tolerated   |       |               |
| p.Asp125Met | VUS           | -0.01  | Neutral       | 0.8052 | Pathogenic | -9.40  | Pathogenic | 0.52 | Disease | 0.94 | Possibly damaging | 0.06 | Tolerated   |       |               |
| p.Asp125His | VUS           | -0.08  | Neutral       | 0.3071 | Benign     | -4.75  | Benign     | 0.27 | Neutral | 0.00 | Benign            | 0.08 | Tolerated   | 11.51 | Neutral       |
| p.Asp125Gln | VUS           | 0.00   | Neutral       | 0.2999 | Benign     | -5.99  | Benign     | 0.26 | Neutral | 0.24 | Benign            | 0.3  | Tolerated   |       |               |
| p.Asp125Pro | VUS           | -0.63  | Neutral       | 0.4534 | Ambiguous  | -6.85  | Benign     | 0.30 | Neutral | 0.06 | Benign            | 0.23 | Tolerated   |       |               |
| p.Asp125Leu | VUS           | -0.52  | Neutral       | 0.5063 | Ambiguous  | -7.72  | Pathogenic | 0.30 | Neutral | 0.62 | Possibly damaging | 0.22 | Tolerated   |       |               |
| p.Asp125Glu | VUS           | -0.31  | Neutral       | 0.1526 | Benign     | -4.16  | Benign     | 0.08 | Neutral | 0.00 | Benign            | 0.53 | Tolerated   | 3.76  | Neutral       |
| p.Asp125Ala | VUS           | -3.17  | Neutral       | 0.1713 | Benign     | -3.78  | Benign     | 0.17 | Neutral | 0.01 | Benign            | 0.47 | Tolerated   | 14.59 | Neutral       |
| p.Asp125Gly | VUS           | -1.02  | Neutral       | 0.2285 | Benign     | -5.41  | Benign     | 0.41 | Neutral | 0.34 | Benign            | 0.22 | Tolerated   | 18.70 | Deleterious   |
| p.Asp125Val | VUS           | 0.00   | Neutral       | 0.354  | Ambiguous  | -7.27  | Benign     | 0.32 | Neutral | 0.06 | Benign            | 0.16 | Tolerated   | 18.83 | Deleterious   |
| p.Asp125Tyr | VUS           | -53.15 | Deleterious   | 0.4002 | Ambiguous  | -10.54 | Pathogenic | 0.54 | Disease | 0.62 | Possibly damaging | 0.04 | Deleterious | 19.73 | Deleterious   |
| p.Asp125Cys | VUS           | -0.23  | Neutral       | 0.8053 | Pathogenic | -8.69  | Pathogenic | 0.51 | Disease | 1.00 | Probably damaging | 0.03 | Deleterious |       |               |
| p.Asp125Trp | VUS           | -0.08  | Neutral       | 0.8612 | Pathogenic | -10.59 | Pathogenic | 0.51 | Disease | 0.98 | Probably damaging | 0.01 | Deleterious |       |               |
| p.Asp125Phe | VUS           | -0.75  | Neutral       | 0.7897 | Pathogenic | -11.42 | Pathogenic | 0.52 | Disease | 0.62 | Possibly damaging | 0.04 | Deleterious |       |               |
| p.Val126Asn | VUS           | -0.47  | Neutral       | 0.9138 | Pathogenic | -15.68 | Pathogenic | 0.71 | Disease | 1.00 | Probably damaging | 0    | Deleterious |       |               |
| p.Val126Lys | VUS           | -53.15 | Deleterious   | 0.9309 | Pathogenic | -16.52 | Pathogenic | 0.78 | Disease | 1.00 | Probably damaging | 0    | Deleterious |       |               |
| p.Val126Thr | VUS           | 0.00   | Neutral       | 0.4014 | Ambiguous  | -8.18  | Pathogenic | 0.60 | Disease | 1.00 | Probably damaging | 0.01 | Deleterious |       |               |
| p.Val126Arg | VUS           | -53.15 | Deleterious   | 0.8469 | Pathogenic | -14.45 | Pathogenic | 0.78 | Disease | 1.00 | Probably damaging | 0    | Deleterious |       |               |
| p.Val126Ser | VUS           | 0.00   | Neutral       | 0.7069 | Pathogenic | -11.39 | Pathogenic | 0.71 | Disease | 1.00 | Probably damaging | 0    | Deleterious |       |               |
| p.Val126Ile | VUS           | 0.00   | Neutral       | 0.1435 | Benign     | -4.94  | Benign     | 0.24 | Neutral | 0.02 | Benign            | 0.18 | Tolerated   | 14.41 | Neutral       |
| p.Val126Met | VUS           | 0.00   | Neutral       | 0.6606 | Pathogenic | -9.28  | Pathogenic | 0.58 | Disease | 1.00 | Probably damaging | 0.01 | Deleterious |       |               |
| p.Val126His | VUS           | -33.22 | Indeterminate | 0.9725 | Pathogenic | -14.49 | Pathogenic | 0.72 | Disease | 1.00 | Probably damaging | 0    | Deleterious |       |               |
| p.Val126Gln | VUS           | -1.39  | Neutral       | 0.9026 | Pathogenic | -15.09 | Pathogenic | 0.75 | Disease | 1.00 | Probably damaging | 0    | Deleterious |       |               |
| p.Val126Pro | VUS           | 0.00   | Neutral       | 0.8918 | Pathogenic | -11.16 | Pathogenic | 0.73 | Disease | 1.00 | Probably damaging | 0    | Deleterious |       |               |
| p.Val126Leu | VUS           | 0.00   | Neutral       | 0.6571 | Pathogenic | -6.58  | Benign     | 0.55 | Disease | 0.38 | Benign            | 0.03 | Deleterious | 18.01 | Deleterious   |
| p.Val126Asp | Pathogenic    | -53.15 | Deleterious   | 0.9359 | Pathogenic | -15.06 | Pathogenic | 0.85 | Disease | 1.00 | Probably damaging | 0    | Deleterious | 24.20 | Deleterious   |
| p.Val126Glu | VUS           | -0.02  | Neutral       | 0.876  | Pathogenic | -13.79 | Pathogenic | 0.89 | Disease | 1.00 | Probably damaging | 0    | Deleterious |       |               |
| p.Val126Ala | VUS           | -0.01  | Neutral       | 0.3085 | Benign     | -6.81  | Benign     | 0.60 | Disease | 1.00 | Probably damaging | 0.01 | Deleterious | 23.60 | Deleterious   |
| p.Val126Gly | VUS           | -0.41  | Neutral       | 0.627  | Pathogenic | -12.00 | Pathogenic | 0.69 | Disease | 1.00 | Probably damaging | 0    | Deleterious | 23.80 | Deleterious   |
| p.Val126Tyr | VUS           | -53.15 | Deleterious   | 0.982  | Pathogenic | -16.16 | Pathogenic | 0.71 | Disease | 1.00 | Probably damaging | 0    | Deleterious |       |               |
| p.Val126Cys | VUS           | 0.00   | Neutral       | 0.9051 | Pathogenic | -8.45  | Pathogenic | 0.67 | Disease | 1.00 | Probably damaging | 0    | Deleterious |       |               |
| p.Val126Trp | VUS           | -53.15 | Deleterious   | 0.9938 | Pathogenic | -15.53 | Pathogenic | 0.68 | Disease | 1.00 | Probably damaging | 0    | Deleterious |       |               |
| p.Val126Phe | VUS           | -0.42  | Neutral       | 0.8624 | Pathogenic | -13.84 | Pathogenic | 0.78 | Disease | 0.99 | Probably damaging | 0    | Deleterious | 22.60 | Deleterious   |
| p.Ala127Asn | VUS           | -1.01  | Neutral       | 0.6811 | Pathogenic | -13.00 | Pathogenic | 0.62 | Disease | 0.97 | Probably damaging | 0.01 | Deleterious |       |               |
| p.Ala127Lys | VUS           | -6.63  | Indeterminate | 0.7578 | Pathogenic | -13.09 | Pathogenic | 0.67 | Disease | 1.00 | Probably damaging | 0.02 | Deleterious |       |               |
| p.Ala127Thr | VUS           | -24.84 | Indeterminate | 0.1629 | Benign     | -7.48  | Benign     | 0.39 | Neutral | 0.97 | Probably damaging | 0.08 | Tolerated   | 22.80 | Deleterious   |
| p.Ala127Arg | VUS           | -19.93 | Indeterminate | 0.501  | Ambiguous  | -10.02 | Pathogenic | 0.51 | Disease | 1.00 | Probably damaging | 0.01 | Deleterious |       |               |
| p.Ala127Ser | Likely benign | -2.10  | Neutral       | 0.1514 | Benign     | -6.46  | Benign     | 0.33 | Neutral | 0.77 | Possibly damaging | 0.02 | Deleterious | 19.18 | Deleterious   |
| p.Ala127Ile | VUS           | -19.64 | Indeterminate | 0.384  | Ambiguous  | -9.36  | Pathogenic | 0.51 | Disease | 0.96 | Possibly damaging | 0.41 | Tolerated   |       |               |
| p.Ala127Met | VUS           | -0.87  | Neutral       | 0.4705 | Ambiguous  | -9.42  | Pathogenic | 0.53 | Disease | 1.00 | Probably damaging | 0.03 | Deleterious |       |               |
| p.Ala127His | VUS           | -26.04 | Indeterminate | 0.7222 | Pathogenic | -11.09 | Pathogenic | 0.61 | Disease | 1.00 | Probably damaging | 0    | Deleterious |       |               |
| p.Ala127Gln | VUS           | -2.66  | Neutral       | 0.4734 | Ambiguous  | -9.09  | Pathogenic | 0.62 | Disease | 1.00 | Probably damaging | 0.01 | Deleterious |       |               |
| p.Ala127Pro | VUS           | -53.15 | Deleterious   | 0.729  | Pathogenic | -8.93  | Pathogenic | 0.72 | Disease | 1.00 | Probably damaging | 0.02 | Deleterious | 23.10 | Deleterious   |
| p.Ala127Leu | VUS           | -3.30  | Neutral       | 0.2703 | Benign     | -6.02  | Benign     | 0.36 | Neutral | 0.96 | Possibly damaging | 0.12 | Tolerated   |       |               |
| p.Ala127Asp | VUS           | -13.68 | Indeterminate | 0.6679 | Pathogenic | -12.66 | Pathogenic | 0.72 | Disease | 1.00 | Probably damaging | 0.01 | Deleterious |       |               |
| p.Ala127Glu | VUS           | -0.78  | Neutral       | 0.4097 | Ambiguous  | -9.59  | Pathogenic | 0.51 | Disease | 1.00 | Probably damaging | 0.02 | Deleterious | 19.09 | Deleterious   |
| p.Ala127Gly | VUS           | -7.66  | Indeterminate | 0.1776 | Benign     | -7.74  | Pathogenic | 0.34 | Neutral | 0.99 | Probably damaging | 0    | Deleterious | 12.32 | Neutral       |
| p.Ala127Val | VUS           | -0.26  | Neutral       | 0.1436 | Benign     | -4.38  | Benign     | 0.16 | Neutral | 0.14 | Benign            | 1    | Tolerated   | 6.92  | Neutral       |
| p.Ala127Tyr | VUS           | -6.56  | Indeterminate | 0.7619 | Pathogenic | -12.16 | Pathogenic | 0.60 | Disease | 1.00 | Probably damaging | 0.01 | Deleterious |       |               |
| p.Ala127Cys | VUS           | -0.09  | Neutral       | 0.5407 | Ambiguous  | -8.02  | Pathogenic | 0.49 | Neutral | 1.00 | Probably damaging | 0.02 | Deleterious |       |               |
| p.Ala127Trp | VUS           | -5.00  | Neutral       | 0.8559 | Pathogenic | -11.20 | Pathogenic | 0.59 | Disease | 1.00 | Probably damaging | 0    | Deleterious |       |               |
| p.Ala127Phe | VUS           | -3.71  | Neutral       | 0.6267 | Pathogenic | -10.86 | Pathogenic | 0.54 | Disease | 1.00 | Probably damaging | 0.02 | Deleterious |       |               |
| p.Arg128Asn | VUS           | 0.00   | Neutral       | 0.3288 | Benign     | -6.42  | Benign     | 0.23 | Neutral | 0.79 | Possibly damaging | 0.24 | Tolerated   |       |               |
| p.Arg128Lys | VUS           | -2.71  | Neutral       | 0.2077 | Benign     | -6.72  | Benign     | 0.12 | Neutral | 0.08 | Benign            | 0.44 | Tolerated   |       |               |
| p.Arg128Thr | VUS           | -0.32  | Neutral       | 0.1483 | Benign     | -6.10  | Benign     | 0.29 | Neutral | 0.79 | Possibly damaging | 0.27 | Tolerated   |       |               |
| p.Arg128Ser | VUS           | -19.13 | Indeterminate | 0.1872 | Benign     | -4.93  | Benign     | 0.14 | Neutral | 0.76 | Possibly damaging | 0.53 | Tolerated   |       |               |
| p.Arg128Ile | VUS           | -8.33  | Indeterminate | 0.2361 | Benign     | -8.69  | Pathogenic | 0.36 | Neutral | 0.90 | Possibly damaging | 0.08 | Tolerated   |       |               |
| p.Arg128Met | VUS           | -1.08  | Neutral       | 0.3178 | Benign     | -8.05  | Pathogenic | 0.37 | Neutral | 0.68 | Possibly damaging | 0.05 | Deleterious |       |               |
| p.Arg128His | VUS           | -3.37  | Neutral       | 0.1143 | Benign     | -5.66  | Benign     | 0.14 | Neutral | 0.81 | Possibly damaging | 0.07 | Tolerated   |       |               |
| p.Arg128Gln | VUS           | -0.11  | Neutral       | 0.118  | Benign     | -5.62  | Benign     | 0.12 | Neutral | 0.13 | Benign            | 0.28 | Tolerated   | 17.20 | Deleterious   |
| p.Arg128Pro | VUS           | -53.15 | Deleterious   | 0.6461 | Pathogenic | -10.17 | Pathogenic | 0.40 | Neutral | 1.00 | Probably damaging | 0.15 | Tolerated   | 19.02 | Deleterious</ |

|             |     |        |               |        |            |        |            |      |         |      |                   |      |             |       |             |
|-------------|-----|--------|---------------|--------|------------|--------|------------|------|---------|------|-------------------|------|-------------|-------|-------------|
| p.Tyr129Met | VUS | -0.78  | Neutral       | 0.9612 | Pathogenic | -12.23 | Pathogenic | 0.53 | Disease | 1.00 | Probably damaging | 0.08 | Tolerated   |       |             |
| p.Tyr129His | VUS | -1.08  | Neutral       | 0.8201 | Pathogenic | -7.47  | Benign     | 0.53 | Disease | 1.00 | Probably damaging | 0.16 | Tolerated   | 28.00 | Deleterious |
| p.Tyr129Gln | VUS | -0.73  | Neutral       | 0.9784 | Pathogenic | -11.98 | Pathogenic | 0.54 | Disease | 1.00 | Probably damaging | 0.09 | Tolerated   |       |             |
| p.Tyr129Pro | VUS | -53.15 | Deleterious   | 0.9962 | Pathogenic | -14.76 | Pathogenic | 0.59 | Disease | 1.00 | Probably damaging | 0.07 | Tolerated   |       |             |
| p.Tyr129Leu | VUS | -0.36  | Neutral       | 0.8573 | Pathogenic | -9.20  | Pathogenic | 0.52 | Disease | 0.94 | Possibly damaging | 0.28 | Tolerated   |       |             |
| p.Tyr129Asp | VUS | -16.50 | Indeterminate | 0.9656 | Pathogenic | -13.41 | Pathogenic | 0.64 | Disease | 1.00 | Probably damaging | 0.06 | Tolerated   | 32.00 | Deleterious |
| p.Tyr129Glu | VUS | -0.57  | Neutral       | 0.9774 | Pathogenic | -12.49 | Pathogenic | 0.60 | Disease | 1.00 | Probably damaging | 0.08 | Tolerated   |       |             |
| p.Tyr129Ala | VUS | -0.56  | Neutral       | 0.9607 | Pathogenic | -10.40 | Pathogenic | 0.39 | Neutral | 1.00 | Probably damaging | 0.17 | Tolerated   |       |             |
| p.Tyr129Gly | VUS | -3.93  | Neutral       | 0.9617 | Pathogenic | -14.19 | Pathogenic | 0.56 | Disease | 1.00 | Probably damaging | 0.1  | Tolerated   |       |             |
| p.Tyr129Val | VUS | -0.90  | Neutral       | 0.8873 | Pathogenic | -9.78  | Pathogenic | 0.57 | Disease | 1.00 | Probably damaging | 0.18 | Tolerated   |       |             |
| p.Tyr129Cys | VUS | -0.95  | Neutral       | 0.8807 | Pathogenic | -9.02  | Pathogenic | 0.41 | Neutral | 1.00 | Probably damaging | 0.15 | Tolerated   | 27.90 | Deleterious |
| p.Tyr129Trp | VUS | -0.17  | Neutral       | 0.7312 | Pathogenic | -7.42  | Benign     | 0.52 | Disease | 1.00 | Probably damaging | 0.14 | Tolerated   |       |             |
| p.Tyr129Phe | VUS | -1.69  | Neutral       | 0.2033 | Benign     | -2.91  | Benign     | 0.24 | Neutral | 0.18 | Benign            | 0.96 | Tolerated   | 22.70 | Deleterious |
| p.Leu130Asn | VUS | -29.02 | Indeterminate | 0.9902 | Pathogenic | -16.37 | Pathogenic | 0.76 | Disease | 1.00 | Probably damaging | 0.01 | Deleterious |       |             |
| p.Leu130Lys | VUS | -53.15 | Deleterious   | 0.9732 | Pathogenic | -16.08 | Pathogenic | 0.78 | Disease | 0.56 | Possibly damaging | 0.02 | Deleterious |       |             |
| p.Leu130Thr | VUS | -2.31  | Neutral       | 0.9455 | Pathogenic | -11.34 | Pathogenic | 0.79 | Disease | 1.00 | Probably damaging | 0.19 | Tolerated   |       |             |
| p.Leu130Arg | VUS | -53.15 | Deleterious   | 0.8515 | Pathogenic | -12.89 | Pathogenic | 0.90 | Disease | 0.99 | Probably damaging | 0.01 | Deleterious | 26.80 | Deleterious |
| p.Leu130Ser | VUS | -3.13  | Neutral       | 0.9847 | Pathogenic | -12.78 | Pathogenic | 0.87 | Disease | 1.00 | Probably damaging | 0.04 | Deleterious |       |             |
| p.Leu130Ile | VUS | -0.30  | Neutral       | 0.4013 | Ambiguous  | -6.51  | Benign     | 0.60 | Disease | 1.00 | Probably damaging | 0.11 | Tolerated   |       |             |
| p.Leu130Met | VUS | -0.88  | Neutral       | 0.6895 | Pathogenic | -8.81  | Pathogenic | 0.66 | Disease | 1.00 | Probably damaging | 0.05 | Deleterious | 24.90 | Deleterious |
| p.Leu130His | VUS | -26.23 | Indeterminate | 0.9657 | Pathogenic | -14.64 | Pathogenic | 0.87 | Disease | 1.00 | Probably damaging | 0.01 | Deleterious |       |             |
| p.Leu130Gln | VUS | -21.89 | Indeterminate | 0.9262 | Pathogenic | -13.79 | Pathogenic | 0.89 | Disease | 0.99 | Probably damaging | 0.01 | Deleterious | 27.00 | Deleterious |
| p.Leu130Pro | VUS | -53.15 | Deleterious   | 0.9537 | Pathogenic | -13.21 | Pathogenic | 0.92 | Disease | 1.00 | Probably damaging | 0.01 | Deleterious | 27.00 | Deleterious |
| p.Leu130Asp | VUS | -53.15 | Deleterious   | 0.9973 | Pathogenic | -15.79 | Pathogenic | 0.74 | Disease | 1.00 | Probably damaging | 0.01 | Deleterious |       |             |
| p.Leu130Glu | VUS | -33.22 | Indeterminate | 0.9695 | Pathogenic | -14.38 | Pathogenic | 0.79 | Disease | 1.00 | Probably damaging | 0.01 | Deleterious |       |             |
| p.Leu130Ala | VUS | -3.07  | Neutral       | 0.8823 | Pathogenic | -9.53  | Pathogenic | 0.76 | Disease | 1.00 | Probably damaging | 0.08 | Tolerated   |       |             |
| p.Leu130Gly | VUS | -2.06  | Neutral       | 0.9579 | Pathogenic | -14.41 | Pathogenic | 0.79 | Disease | 1.00 | Probably damaging | 0.01 | Deleterious |       |             |
| p.Leu130Val | VUS | -0.32  | Neutral       | 0.3976 | Ambiguous  | -6.54  | Benign     | 0.67 | Disease | 0.97 | Probably damaging | 0.13 | Tolerated   | 25.80 | Deleterious |
| p.Leu130Tyr | VUS | -3.10  | Neutral       | 0.9672 | Pathogenic | -14.10 | Pathogenic | 0.74 | Disease | 0.99 | Probably damaging | 0.01 | Deleterious |       |             |
| p.Leu130Cys | VUS | -1.46  | Neutral       | 0.8681 | Pathogenic | -11.99 | Pathogenic | 0.72 | Disease | 1.00 | Probably damaging | 0.16 | Tolerated   |       |             |
| p.Leu130Trp | VUS | -8.91  | Indeterminate | 0.9236 | Pathogenic | -12.53 | Pathogenic | 0.62 | Disease | 1.00 | Probably damaging | 0.01 | Deleterious |       |             |
| p.Leu130Phe | VUS | -0.48  | Neutral       | 0.7227 | Pathogenic | -8.71  | Pathogenic | 0.67 | Disease | 1.00 | Probably damaging | 0.04 | Deleterious |       |             |
| p.Arg131Asn | VUS | -0.68  | Neutral       | 0.451  | Ambiguous  | -8.74  | Pathogenic | 0.52 | Disease | 0.99 | Probably damaging | 0.27 | Tolerated   |       |             |
| p.Arg131Lys | VUS | -0.01  | Neutral       | 0.1996 | Benign     | -7.54  | Pathogenic | 0.48 | Neutral | 0.87 | Possibly damaging | 0.7  | Tolerated   |       |             |
| p.Arg131Thr | VUS | -8.63  | Indeterminate | 0.2073 | Benign     | -7.55  | Pathogenic | 0.54 | Disease | 1.00 | Probably damaging | 0.38 | Tolerated   |       |             |
| p.Arg131Ser | VUS | -1.15  | Neutral       | 0.3002 | Benign     | -6.80  | Benign     | 0.53 | Disease | 1.00 | Probably damaging | 0.34 | Tolerated   | 25.70 | Deleterious |
| p.Arg131Ile | VUS | -0.04  | Neutral       | 0.2953 | Benign     | -9.77  | Pathogenic | 0.59 | Disease | 1.00 | Probably damaging | 0.34 | Tolerated   |       |             |
| p.Arg131Met | VUS | -0.35  | Neutral       | 0.3648 | Ambiguous  | -9.38  | Pathogenic | 0.58 | Disease | 1.00 | Probably damaging | 0.35 | Tolerated   |       |             |
| p.Arg131His | VUS | -0.64  | Neutral       | 0.1147 | Benign     | -6.76  | Benign     | 0.33 | Neutral | 0.23 | Benign            | 0.41 | Tolerated   | 24.10 | Deleterious |
| p.Arg131Gln | VUS | -22.33 | Indeterminate | 0.1263 | Benign     | -6.16  | Benign     | 0.34 | Neutral | 1.00 | Probably damaging | 0.37 | Tolerated   |       |             |
| p.Arg131Pro | VUS | -19.41 | Indeterminate | 0.7075 | Pathogenic | -10.28 | Pathogenic | 0.64 | Disease | 1.00 | Probably damaging | 0.2  | Tolerated   | 23.80 | Deleterious |
| p.Arg131Leu | VUS | -0.02  | Neutral       | 0.1195 | Benign     | -6.72  | Benign     | 0.37 | Neutral | 1.00 | Probably damaging | 0.54 | Tolerated   | 22.80 | Deleterious |
| p.Arg131Asp | VUS | 0.00   | Neutral       | 0.3993 | Ambiguous  | -8.15  | Pathogenic | 0.59 | Disease | 1.00 | Probably damaging | 0.17 | Tolerated   |       |             |
| p.Arg131Glu | VUS | -0.04  | Neutral       | 0.2321 | Benign     | -6.63  | Benign     | 0.53 | Disease | 0.98 | Probably damaging | 0.32 | Tolerated   |       |             |
| p.Arg131Ala | VUS | -0.74  | Neutral       | 0.1688 | Benign     | -5.48  | Benign     | 0.53 | Disease | 1.00 | Probably damaging | 0.52 | Tolerated   |       |             |
| p.Arg131Gly | VUS | -1.08  | Neutral       | 0.1641 | Benign     | -6.87  | Benign     | 0.38 | Neutral | 1.00 | Probably damaging | 0.26 | Tolerated   | 25.70 | Deleterious |
| p.Arg131Val | VUS | -0.61  | Neutral       | 0.2515 | Benign     | -8.11  | Pathogenic | 0.58 | Disease | 1.00 | Probably damaging | 0.56 | Tolerated   |       |             |
| p.Arg131Tyr | VUS | -0.93  | Neutral       | 0.3346 | Benign     | -9.54  | Pathogenic | 0.53 | Disease | 0.93 | Possibly damaging | 0.58 | Tolerated   |       |             |
| p.Arg131Cys | VUS | -53.15 | Deleterious   | 0.2663 | Benign     | -8.50  | Pathogenic | 0.41 | Neutral | 1.00 | Probably damaging | 0.12 | Tolerated   | 28.30 | Deleterious |
| p.Arg131Trp | VUS | -0.79  | Neutral       | 0.1928 | Benign     | -8.69  | Pathogenic | 0.58 | Disease | 1.00 | Probably damaging | 0.11 | Tolerated   |       |             |
| p.Arg131Phe | VUS | 0.00   | Neutral       | 0.3727 | Ambiguous  | -10.29 | Pathogenic | 0.57 | Disease | 0.97 | Probably damaging | 0.41 | Tolerated   |       |             |
| p.Ala132Asn | VUS | -33.21 | Indeterminate | 0.2461 | Benign     | -6.61  | Benign     | 0.35 | Neutral | 0.00 | Benign            | 0.08 | Tolerated   |       |             |
| p.Ala132Lys | VUS | -3.78  | Neutral       | 0.3425 | Ambiguous  | -6.43  | Benign     | 0.46 | Neutral | 0.85 | Possibly damaging | 0.41 | Tolerated   |       |             |
| p.Ala132Thr | VUS | -20.37 | Indeterminate | 0.1104 | Benign     | -5.18  | Benign     | 0.31 | Neutral | 0.05 | Benign            | 0.35 | Tolerated   | 12.63 | Neutral     |
| p.Ala132Arg | VUS | -1.61  | Neutral       | 0.2268 | Benign     | -4.54  | Benign     | 0.38 | Neutral | 0.95 | Possibly damaging | 0.07 | Tolerated   |       |             |
| p.Ala132Ser | VUS | -33.21 | Indeterminate | 0.1128 | Benign     | -4.01  | Benign     | 0.29 | Neutral | 0.04 | Benign            | 0.56 | Tolerated   | 10.21 | Neutral     |
| p.Ala132Ile | VUS | -12.89 | Indeterminate | 0.3068 | Benign     | -7.48  | Benign     | 0.47 | Neutral | 0.74 | Possibly damaging | 0.03 | Deleterious |       |             |
| p.Ala132Met | VUS | -8.62  | Indeterminate | 0.2506 | Benign     | -7.04  | Benign     | 0.43 | Neutral | 0.98 | Probably damaging | 0.02 | Deleterious |       |             |
| p.Ala132His | VUS | -19.91 | Indeterminate | 0.2825 | Benign     | -6.65  | Benign     | 0.46 | Neutral | 0.99 | Probably damaging | 0.02 | Deleterious |       |             |
| p.Ala132Gln | VUS | -1.62  | Neutral       | 0.1939 | Benign     | -4.86  | Benign     | 0.36 | Neutral | 0.98 | Probably damaging | 0.07 | Tolerated   |       |             |
| p.Ala132Pro | VUS | -3.53  | Neutral       | 0.5877 | Pathogenic | -6.77  | Benign     | 0.52 | Disease | 0.95 | Possibly damaging | 0.06 | Tolerated   | 18.35 | Deleterious |
| p.Ala132Leu | VUS | -9.42  | Indeterminate | 0.1643 | Benign     | -5.30  | Benign     | 0.45 | Neutral | 0.74 | Possibly damaging | 0.05 | Deleterious |       |             |
| p.Ala132Asp | VUS | -29.25 | Indeterminate | 0.1618 | Benign     | -4.14  | Benign     | 0.36 | Neutral | 0.01 | Benign            | 0.08 | Tolerated   |       |             |
| p.Ala132Glu | VUS | -9.67  | Indeterminate | 0.1341 | Benign     | -2.89  | Benign     | 0.31 | Neutral | 0.67 | Possibly damaging | 0.1  | Tolerated   | 10.63 | Neutral     |
| p.Ala132Gly | VUS | -53.15 | Deleterious   | 0.1244 | Benign     | -3.15  | Benign     | 0.29 | Neutral | 0.63 | Possibly damaging | 0.09 | Tolerated   | 14.01 | Neutral     |
| p.Ala132Val | VUS | -4.37  | Neutral       | 0.1471 | Benign     | -5.64  | Benign     | 0.30 | Neutral | 0.11 | Benign            | 0.06 | Tolerated   | 10.93 | Neutral     |
| p.Ala132Tyr | VUS | -8.74  | Indeterminate | 0.3593 | Ambiguous  | -8.46  | Pathogenic | 0.46 | Neutral | 0.99 | Probably damaging | 0.01 | Deleterious |       |             |
| p.Ala132Cys | VUS | -14.40 | Indeterminate | 0.4755 | Ambiguous  | -6.02  | Benign     | 0.44 | Neutral | 0.99 | Probably damaging | 0.02 | Deleterious |       |             |
| p.Ala132Trp | VUS | -4.92  | Neutral       | 0.4766 | Ambiguous  | -7.45  | Benign     | 0.51 | Disease | 1.00 | Probably damaging | 0.01 | Deleterious |       |             |
| p.Ala132Phe | VUS | -4.29  | Neutral       | 0.29   | Benign     | -8.13  | Pathogenic | 0.46 | Neutral | 0.98 | Probably damaging | 0.01 | Deleterious |       |             |
| p.Ala133Asn | VUS | -0.02  | Neutral       | 0.4307 | Ambiguous  | -7.78  | Pathogenic | 0.40 | Neutral | 0.00 | Benign            | 0.33 | Tolerated   |       |             |
| p.Ala133Lys | VUS | -0.09  | Neutral       | 0.5727 | Pathogenic | -5.53  | Benign     | 0.51 | Disease | 0.65 | Possibly damaging | 0.36 | Tolerated   |       |             |
| p.Ala133Thr | VUS | -0.13  | Neutral       | 0.125  | Benign     | -5.14  | Benign     | 0.43 | Neutral | 0.00 | Benign            | 0.42 | Tolerated   | 18.39 | Deleterious |
| p.Ala133Arg | VUS | -2.27  | Neutral       | 0.3825 | Ambiguous  | -3.20  | Benign     | 0.50 | Disease | 0.87 | Possibly damaging | 0.39 | Tolerated   |       |             |
| p.Ala133Ser | VUS | -0.11  | Neutral       | 0.1281 | Benign     | -5.87  | Benign     | 0.31 | Neutral | 0.01 | Benign            | 0.43 | Tolerated   | 16.65 | Deleterious |
| p.Ala133Ile | VUS | -0.71  | Neutral       | 0.3424 | Ambiguous  | -5.89  | Benign     | 0.39 | Neutral | 0.48 | Possibly damaging | 0.4  | Tolerated   |       |             |
| p.Ala133Met | VUS | -0.01  | Neutral       | 0.3164 | Benign     | -4.42  | Benign     | 0.49 | Neutral | 0.93 | Possibly damaging | 0.22 | Tolerated   |       |             |
| p.Ala133His | VUS | -0.26  | Neutral       | 0.449  | Ambiguous  | -5.71  | Benign     | 0.50 | Neutral | 0.98 | Probably damaging | 0.55 | Tolerated   |       |             |
| p.Ala133Gln | VUS | -0.08  | Neutral       | 0.3327 | Benign     | -3.97  | Benign     | 0.51 | Disease | 0.87 | Possibly damaging | 0.33 | Tolerated   |       |             |
| p.Ala133Pro | VUS | -0.37  | Neutral       | 0.5773 | Pathogenic | -6.87  | Benign     | 0.38 | Neutral | 0.73 | Possibly damaging | 0.22 | Tolerated   | 22.30 | Deleterious |
| p.Ala133Leu | VUS | -0.18  | Neutral       | 0.2337 | Benign     | -3.65  | Benign     | 0.49 | Neutral | 0.48 | Possibly damaging | 0.66 | Tolerated   |       |             |
| p.Ala133Asp | VUS | -7.43  | Indeterminate | 0.4543 | Ambiguous  | -7.93  | Pathogenic | 0.57 | Disease | 0.16 | Benign            | 0.24 | Tolerated   | 17.88 | Deleterious |
| p.Ala133Glu | VUS | -2.21  | Neutral       | 0.2918 | Benign     | -5.22  | Benign     | 0.50 | Neutral | 0.41 | Benign            | 0.32 | Tolerated   |       |             |
| p.Ala133Gly | VUS | -1.09  | Neutral       | 0.178  | Benign     | -5.15  | Benign     | 0.45 | Neutral | 0.00 | Benign            | 0.35 | Tolerated   | 16.79 | Deleterious |
| p.Ala133Val | VUS | -2.44  | Neutral       | 0.1407 | Benign     | -3.13  | Benign     | 0.31 | Neutral | 0.01 | Benign            | 0.51 | Tolerated   | 13.93 | Neutral     |
| p.Ala133Tyr | VUS | -1.01  | Neutral       | 0.5866 | Pathogenic | -8.24  | Pathogenic | 0.53 | Disease | 0.98 | Probably damaging | 1    | Tolerated   |       |             |
| p.Ala133Cys | VUS | -0.27  | Neutral       | 0.4304 | Ambiguous  | -6.36  | Benign     | 0.50 | Neutral | 0.98 | Probably damaging | 0.18 | Tolerated   |       |             |
| p.Ala133Trp | VUS | -0.43  | Neutral       | 0.7089 | Pathogenic | -6.23  | Benign     | 0.55 | Disease | 0.99 | Probably damaging | 0.18 | Tolerated   |       |             |
| p.Ala133Phe | VUS | -0.96  | Neutral       | 0.4143 | Ambiguous  | -7.72  | Pathogenic | 0.53 | Disease | 0.93 | Possibly damaging | 0.7  | Tolerated   |       |             |
| p.Ala134Asn | VUS | -0.10  | Neutral       | 0.2328 | Benign     | -7.73  | Pathogenic | 0.37 | Neutral | 0.03 | Benign            | 0.2  | Tolerated   |       |             |
| p.Ala134Lys | VUS | -0.93  | Neutral       | 0.3067 | Benign     | -7.53  | Pathogenic | 0.38 | Neutral | 0.29 | Benign            | 0.31 | Tolerated   |       |             |
| p.Ala134Thr | VUS | -2.44  | Neutral       | 0.0865 | Benign     | -5.69  | Benign     | 0.23 | Neutral | 0.00 | Benign            | 1    | Tolerated   | 0.94  | Neutral     |
| p.Ala134Arg | VUS | -2.27  | Neutral       | 0.1773 | Benign     | -5.05  | Benign     | 0.37 | Neutral | 0.45 | Possibly damaging | 0.19 | Tolerated   |       |             |
| p.Ala134Ser | VUS | -1.36  | Neutral       | 0.0891 | Benign     | -5.10  | Benign     | 0.19 | Neutral | 0.00 | Benign            | 0.47 | Tolerated   | 0.19  | Neutral     |
| p.Ala134Ile | VUS | -0.33  | Neutral       | 0.2793 | Benign     | -7.47  | Benign     | 0.39 | Neutral | 0.29 | Benign            |      |             |       |             |

|             |     |        |               |        |           |       |            |      |         |      |                   |      |             |       |             |
|-------------|-----|--------|---------------|--------|-----------|-------|------------|------|---------|------|-------------------|------|-------------|-------|-------------|
| p.Gly135Arg | VUS | 0.00   | Neutral       | 0.1684 | Benign    | -4.16 | Benign     | 0.29 | Neutral | 0.97 | Probably damaging | 0.08 | Tolerated   | 14.69 | Neutral     |
| p.Gly135Ser | VUS | -1.39  | Neutral       | 0.1081 | Benign    | -4.09 | Benign     | 0.18 | Neutral | 0.93 | Possibly damaging | 0.44 | Tolerated   |       |             |
| p.Gly135Ile | VUS | -2.16  | Neutral       | 0.2628 | Benign    | -7.30 | Benign     | 0.45 | Neutral | 1.00 | Probably damaging | 0.06 | Tolerated   |       |             |
| p.Gly135Met | VUS | -0.29  | Neutral       | 0.4175 | Ambiguous | -6.81 | Benign     | 0.46 | Neutral | 1.00 | Probably damaging | 0.05 | Deleterious |       |             |
| p.Gly135His | VUS | -0.47  | Neutral       | 0.2218 | Benign    | -6.08 | Benign     | 0.45 | Neutral | 1.00 | Probably damaging | 0.03 | Deleterious |       |             |
| p.Gly135Gln | VUS | -0.74  | Neutral       | 0.2094 | Benign    | -4.77 | Benign     | 0.42 | Neutral | 0.96 | Probably damaging | 0.07 | Tolerated   |       |             |
| p.Gly135Pro | VUS | -0.58  | Neutral       | 0.3056 | Benign    | -4.07 | Benign     | 0.41 | Neutral | 0.99 | Probably damaging | 0.22 | Tolerated   |       |             |
| p.Gly135Leu | VUS | -1.45  | Neutral       | 0.2535 | Benign    | -5.17 | Benign     | 0.43 | Neutral | 0.98 | Probably damaging | 0.23 | Tolerated   |       |             |
| p.Gly135Asp | VUS | -1.16  | Neutral       | 0.1262 | Benign    | -4.55 | Benign     | 0.30 | Neutral | 0.88 | Possibly damaging | 0.08 | Tolerated   |       |             |
| p.Gly135Glu | VUS | -31.01 | Indeterminate | 0.1313 | Benign    | -3.64 | Benign     | 0.20 | Neutral | 0.07 | Benign            | 0.1  | Tolerated   | 11.99 | Neutral     |
| p.Gly135Ala | VUS | -0.30  | Neutral       | 0.0882 | Benign    | -3.00 | Benign     | 0.31 | Neutral | 0.91 | Possibly damaging | 1    | Tolerated   | 14.70 | Neutral     |
| p.Gly135Val | VUS | -1.45  | Neutral       | 0.1561 | Benign    | -5.17 | Benign     | 0.40 | Neutral | 0.99 | Probably damaging | 0.16 | Tolerated   | 19.92 | Deleterious |
| p.Gly135Tyr | VUS | -0.60  | Neutral       | 0.3453 | Ambiguous | -7.46 | Benign     | 0.45 | Neutral | 1.00 | Probably damaging | 0.04 | Deleterious |       |             |
| p.Gly135Cys | VUS | -0.05  | Neutral       | 0.2046 | Benign    | -6.28 | Benign     | 0.39 | Neutral | 1.00 | Probably damaging | 0.09 | Tolerated   |       |             |
| p.Gly135Trp | VUS | -0.45  | Neutral       | 0.2645 | Benign    | -6.78 | Benign     | 0.43 | Neutral | 1.00 | Probably damaging | 0.02 | Deleterious | 21.20 | Deleterious |
| p.Gly135Phe | VUS | -0.98  | Neutral       | 0.4177 | Ambiguous | -7.49 | Benign     | 0.45 | Neutral | 1.00 | Probably damaging | 0.05 | Deleterious |       |             |
| p.Gly136Asn | VUS | -7.38  | Indeterminate | 0.1736 | Benign    | -5.90 | Benign     | 0.24 | Neutral | 0.00 | Benign            | 0.21 | Tolerated   |       |             |
| p.Gly136Lys | VUS | -0.08  | Neutral       | 0.2592 | Benign    | -5.97 | Benign     | 0.32 | Neutral | 0.36 | Benign            | 0.23 | Tolerated   |       |             |
| p.Gly136Thr | VUS | -0.05  | Neutral       | 0.1004 | Benign    | -4.43 | Benign     | 0.26 | Neutral | 0.52 | Possibly damaging | 0.41 | Tolerated   |       |             |
| p.Gly136Arg | VUS | -0.04  | Neutral       | 0.1522 | Benign    | -4.07 | Benign     | 0.19 | Neutral | 0.03 | Benign            | 0.19 | Tolerated   | 12.18 | Neutral     |
| p.Gly136Ser | VUS | -5.18  | Neutral       | 0.0975 | Benign    | -3.77 | Benign     | 0.16 | Neutral | 0.15 | Benign            | 0.65 | Tolerated   | 12.00 | Neutral     |
| p.Gly136Ile | VUS | -0.50  | Neutral       | 0.1965 | Benign    | -6.12 | Benign     | 0.35 | Neutral | 0.79 | Possibly damaging | 0.24 | Tolerated   |       |             |
| p.Gly136Met | VUS | -0.11  | Neutral       | 0.3032 | Benign    | -6.66 | Benign     | 0.33 | Neutral | 0.99 | Probably damaging | 0.1  | Tolerated   |       |             |
| p.Gly136His | VUS | -8.50  | Indeterminate | 0.1781 | Benign    | -5.62 | Benign     | 0.33 | Neutral | 0.02 | Benign            | 0.16 | Tolerated   |       |             |
| p.Gly136Gln | VUS | -0.68  | Neutral       | 0.1665 | Benign    | -4.91 | Benign     | 0.29 | Neutral | 0.89 | Possibly damaging | 0.18 | Tolerated   |       |             |
| p.Gly136Pro | VUS | -17.41 | Indeterminate | 0.2606 | Benign    | -3.68 | Benign     | 0.34 | Neutral | 0.89 | Possibly damaging | 0.27 | Tolerated   |       |             |
| p.Gly136Leu | VUS | -6.43  | Indeterminate | 0.2113 | Benign    | -4.75 | Benign     | 0.33 | Neutral | 0.52 | Possibly damaging | 0.29 | Tolerated   |       |             |
| p.Gly136Asp | VUS | -22.04 | Indeterminate | 0.0963 | Benign    | -4.26 | Benign     | 0.15 | Neutral | 0.00 | Benign            | 0.19 | Tolerated   | 0.01  | Neutral     |
| p.Gly136Glu | VUS | -0.28  | Neutral       | 0.0992 | Benign    | -3.98 | Benign     | 0.19 | Neutral | 0.36 | Benign            | 0.22 | Tolerated   |       |             |
| p.Gly136Ala | VUS | -0.61  | Neutral       | 0.09   | Benign    | -3.42 | Benign     | 0.12 | Neutral | 0.00 | Benign            | 1    | Tolerated   | 0.04  | Neutral     |
| p.Gly136Val | VUS | -0.13  | Neutral       | 0.1269 | Benign    | -4.79 | Benign     | 0.26 | Neutral | 0.29 | Benign            | 0.35 | Tolerated   | 7.01  | Neutral     |
| p.Gly136Tyr | VUS | -2.12  | Neutral       | 0.2855 | Benign    | -7.52 | Pathogenic | 0.37 | Neutral | 0.89 | Possibly damaging | 0.27 | Tolerated   |       |             |
| p.Gly136Cys | VUS | -9.10  | Indeterminate | 0.1768 | Benign    | -6.13 | Benign     | 0.32 | Neutral | 0.01 | Benign            | 0.13 | Tolerated   | 13.10 | Neutral     |
| p.Gly136Trp | VUS | -3.05  | Neutral       | 0.2066 | Benign    | -6.85 | Benign     | 0.34 | Neutral | 0.99 | Probably damaging | 0.06 | Tolerated   |       |             |
| p.Gly136Phe | VUS | -3.24  | Neutral       | 0.3221 | Benign    | -7.08 | Benign     | 0.34 | Neutral | 0.96 | Probably damaging | 0.21 | Tolerated   |       |             |
| p.Thr137Asn | VUS | -0.55  | Neutral       | 0.0965 | Benign    | -4.57 | Benign     | 0.23 | Neutral | 0.65 | Possibly damaging | 0.55 | Tolerated   | 14.08 | Neutral     |
| p.Thr137Lys | VUS | -0.52  | Neutral       | 0.1405 | Benign    | -4.41 | Benign     | 0.35 | Neutral | 0.55 | Possibly damaging | 0.23 | Tolerated   |       |             |
| p.Thr137Arg | VUS | -1.34  | Neutral       | 0.0794 | Benign    | -2.14 | Benign     | 0.29 | Neutral | 0.02 | Benign            | 0.15 | Tolerated   |       |             |
| p.Thr137Ser | VUS | -0.38  | Neutral       | 0.0779 | Benign    | -2.45 | Benign     | 0.16 | Neutral | 0.01 | Benign            | 0.45 | Tolerated   | 6.14  |             |
| p.Thr137Ile | VUS | -3.13  | Neutral       | 0.1468 | Benign    | -5.11 | Benign     | 0.35 | Neutral | 0.48 | Possibly damaging | 0.06 | Tolerated   | 15.18 | Deleterious |
| p.Thr137Met | VUS | -0.62  | Neutral       | 0.1281 | Benign    | -5.43 | Benign     | 0.37 | Neutral | 0.95 | Possibly damaging | 0.03 | Deleterious |       |             |
| p.Thr137His | VUS | -1.76  | Neutral       | 0.1225 | Benign    | -3.97 | Benign     | 0.41 | Neutral | 0.99 | Probably damaging | 0.06 | Tolerated   |       |             |
| p.Thr137Gln | VUS | -3.36  | Neutral       | 0.1096 | Benign    | -3.44 | Benign     | 0.36 | Neutral | 0.90 | Possibly damaging | 0.36 | Tolerated   |       |             |
| p.Thr137Pro | VUS | -0.52  | Neutral       | 0.056  | Benign    | -2.24 | Benign     | 0.19 | Neutral | 0.01 | Benign            | 0.1  | Tolerated   | 6.04  | Neutral     |
| p.Thr137Leu | VUS | -0.74  | Neutral       | 0.0931 | Benign    | -3.41 | Benign     | 0.40 | Neutral | 0.34 | Benign            | 0.08 | Tolerated   |       |             |
| p.Thr137Asp | VUS | -1.83  | Neutral       | 0.1409 | Benign    | -2.83 | Benign     | 0.40 | Neutral | 0.71 | Possibly damaging | 0.24 | Tolerated   |       |             |
| p.Thr137Glu | VUS | -1.17  | Neutral       | 0.1202 | Benign    | -2.54 | Benign     | 0.40 | Neutral | 0.71 | Possibly damaging | 0.2  | Tolerated   |       |             |
| p.Thr137Ala | VUS | -3.04  | Neutral       | 0.0728 | Benign    | -2.00 | Benign     | 0.13 | Neutral | 0.00 | Benign            | 0.21 | Tolerated   | 2.64  | Neutral     |
| p.Thr137Gly | VUS | -0.57  | Neutral       | 0.0918 | Benign    | -1.59 | Benign     | 0.43 | Neutral | 0.34 | Benign            | 0.16 | Tolerated   |       |             |
| p.Thr137Val | VUS | -0.45  | Neutral       | 0.1196 | Benign    | -3.47 | Benign     | 0.39 | Neutral | 0.03 | Benign            | 0.09 | Tolerated   |       |             |
| p.Thr137Tyr | VUS | -0.56  | Neutral       | 0.1962 | Benign    | -6.09 | Benign     | 0.42 | Neutral | 0.98 | Probably damaging | 0.04 | Deleterious |       |             |
| p.Thr137Cys | VUS | -6.22  | Indeterminate | 0.2876 | Benign    | -4.48 | Benign     | 0.41 | Neutral | 0.99 | Probably damaging | 0.03 | Deleterious |       |             |
| p.Thr137Trp | VUS | -0.80  | Neutral       | 0.2606 | Benign    | -4.81 | Benign     | 0.47 | Neutral | 1.00 | Probably damaging | 0.01 | Deleterious |       |             |
| p.Thr137Phe | VUS | -0.80  | Neutral       | 0.1667 | Benign    | -5.57 | Benign     | 0.43 | Neutral | 0.95 | Possibly damaging | 0.03 | Deleterious |       |             |
| p.Arg138Asn | VUS | -1.57  | Neutral       | 0.2106 | Benign    | -4.35 | Benign     | 0.27 | Neutral | 0.00 | Benign            | 0.34 | Tolerated   |       |             |
| p.Arg138Lys | VUS | -0.03  | Neutral       | 0.142  | Benign    | -5.07 | Benign     | 0.17 | Neutral | 0.00 | Benign            | 1    | Tolerated   | 0.10  | Neutral     |
| p.Arg138Thr | VUS | -0.25  | Neutral       | 0.0777 | Benign    | -3.90 | Benign     | 0.13 | Neutral | 0.00 | Benign            | 0.38 | Tolerated   | 0.07  | Neutral     |
| p.Arg138Ser | VUS | 0.00   | Neutral       | 0.1182 | Benign    | -3.18 | Benign     | 0.19 | Neutral | 0.00 | Benign            | 0.43 | Tolerated   | 7.95  | Neutral     |
| p.Arg138Ile | VUS | -0.01  | Neutral       | 0.1574 | Benign    | -5.73 | Benign     | 0.25 | Neutral | 0.01 | Benign            | 0.16 | Tolerated   | 6.18  | Neutral     |
| p.Arg138Met | VUS | 0.00   | Neutral       | 0.2112 | Benign    | -5.98 | Benign     | 0.26 | Neutral | 0.11 | Benign            | 0.09 | Tolerated   |       |             |
| p.Arg138His | VUS | -1.18  | Neutral       | 0.0894 | Benign    | -4.65 | Benign     | 0.17 | Neutral | 0.07 | Benign            | 0.17 | Tolerated   |       |             |
| p.Arg138Gln | VUS | -0.05  | Neutral       | 0.0888 | Benign    | -4.23 | Benign     | 0.12 | Neutral | 0.00 | Benign            | 0.47 | Tolerated   |       |             |
| p.Arg138Pro | VUS | -4.52  | Neutral       | 0.081  | Benign    | -2.99 | Benign     | 0.24 | Neutral | 0.03 | Benign            | 0.2  | Tolerated   |       |             |
| p.Arg138Leu | VUS | 0.00   | Neutral       | 0.1027 | Benign    | -4.21 | Benign     | 0.22 | Neutral | 0.00 | Benign            | 0.27 | Tolerated   |       |             |
| p.Arg138Asp | VUS | -0.07  | Neutral       | 0.1354 | Benign    | -3.15 | Benign     | 0.17 | Neutral | 0.00 | Benign            | 0.32 | Tolerated   |       |             |
| p.Arg138Glu | VUS | -0.95  | Neutral       | 0.1114 | Benign    | -3.13 | Benign     | 0.15 | Neutral | 0.00 | Benign            | 0.57 | Tolerated   |       |             |
| p.Arg138Ala | VUS | -1.36  | Neutral       | 0.0753 | Benign    | -2.56 | Benign     | 0.26 | Neutral | 0.00 | Benign            | 0.46 | Tolerated   |       |             |
| p.Arg138Gly | VUS | -0.38  | Neutral       | 0.0609 | Benign    | -2.55 | Benign     | 0.10 | Neutral | 0.00 | Benign            | 0.26 | Tolerated   | 9.06  | Neutral     |
| p.Arg138Val | VUS | -0.15  | Neutral       | 0.1281 | Benign    | -4.09 | Benign     | 0.29 | Neutral | 0.00 | Benign            | 0.23 | Tolerated   |       |             |
| p.Arg138Tyr | VUS | 0.00   | Neutral       | 0.225  | Benign    | -6.28 | Benign     | 0.28 | Neutral | 0.18 | Benign            | 0.14 | Tolerated   |       |             |
| p.Arg138Cys | VUS | -0.01  | Neutral       | 0.1701 | Benign    | -5.08 | Benign     | 0.23 | Neutral | 0.43 | Benign            | 0.05 | Deleterious |       |             |
| p.Arg138Trp | VUS | 0.00   | Neutral       | 0.1311 | Benign    | -6.12 | Benign     | 0.21 | Neutral | 0.43 | Benign            | 0.04 | Deleterious |       |             |
| p.Arg138Phe | VUS | -0.11  | Neutral       | 0.2553 | Benign    | -6.12 | Benign     | 0.29 | Neutral | 0.03 | Benign            | 0.1  | Tolerated   |       |             |
| p.Gly139Asn | VUS | -2.55  | Neutral       | 0.1977 | Benign    | -5.50 | Benign     | 0.40 | Neutral | 0.30 | Benign            | 0    | Deleterious |       |             |
| p.Gly139Lys | VUS | -4.57  | Neutral       | 0.3065 | Benign    | -5.76 | Benign     | 0.43 | Neutral | 0.02 | Benign            | 0    | Deleterious |       |             |
| p.Gly139Thr | VUS | -7.65  | Indeterminate | 0.1081 | Benign    | -4.38 | Benign     | 0.31 | Neutral | 0.18 | Benign            | 0    | Deleterious |       |             |
| p.Gly139Arg | VUS | -1.61  | Neutral       | 0.17   | Benign    | -3.75 | Benign     | 0.26 | Neutral | 0.00 | Benign            | 0    | Deleterious | 10.44 | Neutral     |
| p.Gly139Ser | VUS | -4.27  | Neutral       | 0.1007 | Benign    | -3.68 | Benign     | 0.18 | Neutral | 0.00 | Benign            | 0    | Deleterious | 4.19  | Neutral     |
| p.Gly139Ile | VUS | -1.29  | Neutral       | 0.1859 | Benign    | -5.82 | Benign     | 0.46 | Neutral | 0.18 | Benign            | 0    | Deleterious |       |             |
| p.Gly139Met | VUS | -5.11  | Neutral       | 0.3266 | Benign    | -6.63 | Benign     | 0.46 | Neutral | 0.90 | Possibly damaging | 0    | Deleterious |       |             |
| p.Gly139His | VUS | -1.68  | Neutral       | 0.191  | Benign    | -5.23 | Benign     | 0.32 | Neutral | 0.00 | Benign            | 0    | Deleterious |       |             |
| p.Gly139Gln | VUS | -1.02  | Neutral       | 0.185  | Benign    | -4.97 | Benign     | 0.42 | Neutral | 0.04 | Benign            | 0    | Deleterious |       |             |
| p.Gly139Pro | VUS | -6.78  | Indeterminate | 0.2134 | Benign    | -3.36 | Benign     | 0.42 | Neutral | 0.75 | Possibly damaging | 0    | Deleterious |       |             |
| p.Gly139Leu | VUS | -3.93  | Neutral       | 0.2184 | Benign    | -4.61 | Benign     | 0.44 | Neutral | 0.18 | Benign            | 0    | Deleterious |       |             |
| p.Gly139Asp | VUS | -7.08  | Indeterminate | 0.1074 | Benign    | -4.34 | Benign     | 0.27 | Neutral | 0.01 | Benign            | 0    | Deleterious | 15.62 | Deleterious |
| p.Gly139Glu | VUS | -3.30  | Neutral       | 0.1158 | Benign    | -4.40 | Benign     | 0.38 | Neutral | 0.15 | Benign            | 0    | Deleterious |       |             |
| p.Gly139Ala | VUS | -7.05  | Indeterminate | 0.0943 | Benign    | -3.44 | Benign     | 0.19 | Neutral | 0.03 | Benign            | 0    | Deleterious | 14.30 | Neutral     |
| p.Gly139Val | VUS | -0.26  | Neutral       | 0.1219 | Benign    | -4.71 | Benign     | 0.29 | Neutral | 0.01 | Benign            | 0    | Deleterious | 15.89 | Deleterious |
| p.Gly139Tyr | VUS | -11.79 | Indeterminate | 0.2451 | Benign    | -6.64 | Benign     | 0.47 | Neutral | 0.60 | Possibly damaging | 0    | Deleterious |       |             |
| p.Gly139Cys | VUS | -0.55  | Neutral       | 0.1649 | Benign    | -5.70 | Benign     | 0.42 | Neutral | 0.00 | Benign            | 0    | Deleterious | 11.46 | Neutral     |
| p.Gly139Trp | VUS | -2.00  | Neutral       | 0.1747 | Benign    | -6.41 | Benign     | 0.44 | Neutral | 0.97 | Probably damaging | 0    | Deleterious |       |             |
| p.Gly139Phe | VUS | -4.58  | Neutral       | 0.3282 | Benign    | -6.45 | Benign     | 0.45 | Neutral | 0.75 | Possibly damaging | 0    | Deleterious |       |             |
| p.Ser140Asn | VUS | -0.75  | Neutral       | 0.1255 | Benign    | -4.78 | Benign     | 0.20 | Neutral | 0.07 | Benign            | 0.86 | Tolerated   | 10.99 | Neutral     |
| p.Ser140Lys | VUS | -0.33  | Neutral       | 0.3318 | Benign    | -4.95 | Benign     | 0.28 | Neutral | 0.05 | Benign            | 0.48 | Tolerated   |       |             |
| p.Ser140Thr | VUS | -0.31  | Neutral       | 0.0958 | Benign    | -4.00 | Benign     | 0.19 | Neutral | 0.26 | Benign            | 0.74 | Tolerated   | 14.43 | Neutral     |
| p.Ser140Arg | VUS | -3.36  | Neutral       | 0.1902 | Benign    | -3.15 | Benign     | 0.21 | Neutral | 0.00 | Benign            | 0.34 | Tolerated   | 3.22  | Neutral</   |

|             |               |       |         |        |           |       |        |      |         |      |                   |      |             |       |             |
|-------------|---------------|-------|---------|--------|-----------|-------|--------|------|---------|------|-------------------|------|-------------|-------|-------------|
| p.Asn141Lys | VUS           | -0.39 | Neutral | 0.2591 | Benign    | -0.77 | Benign | 0.11 | Neutral | 0.01 | Benign            | 0.72 | Tolerated   | 11.59 | Neutral     |
| p.Asn141Thr | VUS           | -2.77 | Neutral | 0.0964 | Benign    | -1.83 | Benign | 0.11 | Neutral | 0.01 | Benign            | 0.25 | Tolerated   | 1.26  | Neutral     |
| p.Asn141Arg | VUS           | -0.97 | Neutral | 0.1387 | Benign    | -0.94 | Benign | 0.15 | Neutral | 0.00 | Benign            | 1    | Tolerated   |       |             |
| p.Asn141Ser | VUS           | -0.22 | Neutral | 0.06   | Benign    | -0.87 | Benign | 0.05 | Neutral | 0.00 | Benign            | 0.31 | Tolerated   | 0.01  | Neutral     |
| p.Asn141Ile | VUS           | -0.37 | Neutral | 0.1859 | Benign    | -3.06 | Benign | 0.22 | Neutral | 0.01 | Benign            | 0.08 | Tolerated   | 9.60  | Neutral     |
| p.Asn141Met | VUS           | -0.27 | Neutral | 0.3507 | Ambiguous | -3.84 | Benign | 0.25 | Neutral | 0.10 | Benign            | 0.05 | Deleterious |       |             |
| p.Asn141His | VUS           | -2.15 | Neutral | 0.0972 | Benign    | -2.50 | Benign | 0.15 | Neutral | 0.14 | Benign            | 0.15 | Tolerated   | 11.25 | Neutral     |
| p.Asn141Gln | VUS           | -0.80 | Neutral | 0.2108 | Benign    | -2.04 | Benign | 0.13 | Neutral | 0.03 | Benign            | 0.31 | Tolerated   |       |             |
| p.Asn141Pro | VUS           | -1.00 | Neutral | 0.1131 | Benign    | -0.78 | Benign | 0.20 | Neutral | 0.03 | Benign            | 0.14 | Tolerated   |       |             |
| p.Asn141Leu | VUS           | -0.14 | Neutral | 0.1576 | Benign    | -1.46 | Benign | 0.21 | Neutral | 0.00 | Benign            | 0.15 | Tolerated   |       |             |
| p.Asn141Asp | VUS           | -0.21 | Neutral | 0.10   | Benign    | -1.68 | Benign | 0.07 | Neutral | 0.00 | Benign            | 0.33 | Tolerated   | 5.52  | Neutral     |
| p.Asn141Glu | VUS           | -1.28 | Neutral | 0.2015 | Benign    | -1.38 | Benign | 0.13 | Neutral | 0.01 | Benign            | 0.32 | Tolerated   |       |             |
| p.Asn141Ala | VUS           | -0.22 | Neutral | 0.1119 | Benign    | -0.72 | Benign | 0.19 | Neutral | 0.00 | Benign            | 0.25 | Tolerated   |       |             |
| p.Asn141Gly | VUS           | -0.33 | Neutral | 0.128  | Benign    | -0.38 | Benign | 0.10 | Neutral | 0.00 | Benign            | 0.28 | Tolerated   |       |             |
| p.Asn141Val | VUS           | -0.04 | Neutral | 0.1653 | Benign    | -1.97 | Benign | 0.23 | Neutral | 0.01 | Benign            | 0.11 | Tolerated   |       |             |
| p.Asn141Tyr | VUS           | -0.90 | Neutral | 0.14   | Benign    | -4.40 | Benign | 0.19 | Neutral | 0.14 | Benign            | 0.1  | Tolerated   | 12.95 | Neutral     |
| p.Asn141Cys | VUS           | -2.57 | Neutral | 0.1935 | Benign    | -2.75 | Benign | 0.24 | Neutral | 0.18 | Benign            | 0.03 | Deleterious |       |             |
| p.Asn141Trp | VUS           | -0.06 | Neutral | 0.4218 | Ambiguous | -3.02 | Benign | 0.28 | Neutral | 0.71 | Possibly damaging | 0.03 | Deleterious |       |             |
| p.Asn141Phe | VUS           | -0.47 | Neutral | 0.3924 | Ambiguous | -3.45 | Benign | 0.25 | Neutral | 0.10 | Benign            | 0.06 | Tolerated   |       |             |
| p.His142Asn | VUS           | 0.00  | Neutral | 0.1197 | Benign    | -3.33 | Benign | 0.25 | Neutral | 0.02 | Benign            | 1    | Tolerated   | 11.88 | Neutral     |
| p.His142Lys | VUS           | 0.00  | Neutral | 0.2146 | Benign    | -3.01 | Benign | 0.28 | Neutral | 0.01 | Benign            | 0.17 | Tolerated   |       |             |
| p.His142Thr | VUS           | 0.00  | Neutral | 0.1444 | Benign    | -2.18 | Benign | 0.30 | Neutral | 0.01 | Benign            | 0.12 | Tolerated   |       |             |
| p.His142Arg | VUS           | 0.00  | Neutral | 0.0718 | Benign    | -1.68 | Benign | 0.23 | Neutral | 0.00 | Benign            | 0.11 | Tolerated   |       |             |
| p.His142Ser | VUS           | 0.00  | Neutral | 0.1269 | Benign    | -1.78 | Benign | 0.25 | Neutral | 0.00 | Benign            | 0.22 | Tolerated   |       |             |
| p.His142Ile | VUS           | 0.00  | Neutral | 0.2557 | Benign    | -3.13 | Benign | 0.31 | Neutral | 0.09 | Benign            | 0.03 | Deleterious |       |             |
| p.His142Met | VUS           | 0.00  | Neutral | 0.3804 | Ambiguous | -3.62 | Benign | 0.32 | Neutral | 0.52 | Possibly damaging |      | Deleterious |       |             |
| p.His142Gln | VUS           | -0.01 | Neutral | 0.1289 | Benign    | -2.77 | Benign | 0.19 | Neutral | 0.00 | Benign            | 0.1  | Tolerated   | 0.01  | Neutral     |
| p.His142Pro | VUS           | 0.00  | Neutral | 0.0702 | Benign    | -1.34 | Benign | 0.18 | Neutral | 0.00 | Benign            | 0.07 | Tolerated   | 0.05  | Neutral     |
| p.His142Leu | VUS           | 0.00  | Neutral | 0.1061 | Benign    | -1.95 | Benign | 0.31 | Neutral | 0.02 | Benign            | 0.06 | Tolerated   | 4.22  | Neutral     |
| p.His142Asp | VUS           | 0.00  | Neutral | 0.1004 | Benign    | -2.16 | Benign | 0.22 | Neutral | 0.02 | Benign            | 0.35 | Tolerated   | 12.83 | Neutral     |
| p.His142Glu | VUS           | 0.00  | Neutral | 0.1352 | Benign    | -1.77 | Benign | 0.27 | Neutral | 0.01 | Benign            | 0.15 | Tolerated   |       |             |
| p.His142Ala | VUS           | 0.00  | Neutral | 0.1025 | Benign    | -1.08 | Benign | 0.33 | Neutral | 0.01 | Benign            | 0.11 | Tolerated   |       |             |
| p.His142Gly | VUS           | 0.00  | Neutral | 0.1126 | Benign    | -0.62 | Benign | 0.26 | Neutral | 0.01 | Benign            | 0.25 | Tolerated   |       |             |
| p.His142Val | VUS           | 0.00  | Neutral | 0.1537 | Benign    | -2.18 | Benign | 0.32 | Neutral | 0.05 | Benign            | 0.05 | Deleterious |       |             |
| p.His142Tyr | VUS           | 0.00  | Neutral | 0.1167 | Benign    | -4.44 | Benign | 0.29 | Neutral | 0.07 | Benign            | 0.09 | Tolerated   | 15.56 | Deleterious |
| p.His142Cys | VUS           | 0.00  | Neutral | 0.2166 | Benign    | -3.85 | Benign | 0.26 | Neutral | 0.81 | Possibly damaging | 0.03 | Deleterious |       |             |
| p.His142Trp | VUS           | 0.00  | Neutral | 0.2488 | Benign    | -4.24 | Benign | 0.32 | Neutral | 0.81 | Possibly damaging | 0.02 | Deleterious |       |             |
| p.His142Phe | VUS           | -0.01 | Neutral | 0.2291 | Benign    | -3.98 | Benign | 0.32 | Neutral | 0.27 | Benign            | 0.05 | Deleterious |       |             |
| p.Ala143Asn | VUS           | -1.04 | Neutral | 0.1998 | Benign    | -4.62 | Benign | 0.35 | Neutral | 0.69 | Possibly damaging | 0.54 | Tolerated   |       |             |
| p.Ala143Lys | VUS           | -0.58 | Neutral | 0.2701 | Benign    | -4.70 | Benign | 0.27 | Neutral | 0.69 | Possibly damaging | 0.67 | Tolerated   |       |             |
| p.Ala143Thr | VUS           | -0.48 | Neutral | 0.0847 | Benign    | -4.30 | Benign | 0.28 | Neutral | 0.00 | Benign            | 0.56 | Tolerated   | 8.17  | Neutral     |
| p.Ala143Arg | VUS           | -0.80 | Neutral | 0.1332 | Benign    | -3.14 | Benign | 0.35 | Neutral | 0.69 | Possibly damaging | 0.52 | Tolerated   |       |             |
| p.Ala143Ser | VUS           | -0.86 | Neutral | 0.0842 | Benign    | -3.57 | Benign | 0.26 | Neutral | 0.19 | Benign            | 0.72 | Tolerated   | 12.41 | Neutral     |
| p.Ala143Ile | VUS           | -0.71 | Neutral | 0.2309 | Benign    | -5.25 | Benign | 0.27 | Neutral | 0.24 | Benign            | 0.33 | Tolerated   |       |             |
| p.Ala143Met | VUS           | -0.89 | Neutral | 0.2533 | Benign    | -5.97 | Benign | 0.39 | Neutral | 0.94 | Possibly damaging | 0.18 | Tolerated   |       |             |
| p.Ala143His | VUS           | -1.17 | Neutral | 0.1867 | Benign    | -4.21 | Benign | 0.37 | Neutral | 0.98 | Probably damaging | 0.42 | Tolerated   |       |             |
| p.Ala143Gln | VUS           | -0.91 | Neutral | 0.1507 | Benign    | -4.16 | Benign | 0.33 | Neutral | 0.82 | Possibly damaging | 0.44 | Tolerated   |       |             |
| p.Ala143Pro | VUS           | -1.82 | Neutral | 0.0784 | Benign    | -3.37 | Benign | 0.27 | Neutral | 0.77 | Possibly damaging | 0.34 | Tolerated   | 16.83 | Deleterious |
| p.Ala143Leu | VUS           | -0.93 | Neutral | 0.1214 | Benign    | -4.00 | Benign | 0.37 | Neutral | 0.24 | Benign            | 0.53 | Tolerated   |       |             |
| p.Ala143Asp | VUS           | -0.87 | Neutral | 0.118  | Benign    | -3.80 | Benign | 0.38 | Neutral | 0.62 | Possibly damaging | 0.54 | Tolerated   | 15.10 | Deleterious |
| p.Ala143Glu | VUS           | -0.69 | Neutral | 0.117  | Benign    | -3.79 | Benign | 0.33 | Neutral | 0.69 | Possibly damaging | 0.65 | Tolerated   |       |             |
| p.Ala143Gly | VUS           | -0.83 | Neutral | 0.0776 | Benign    | -3.01 | Benign | 0.30 | Neutral | 0.32 | Benign            | 0.61 | Tolerated   | 14.00 | Neutral     |
| p.Ala143Val | VUS           | -0.68 | Neutral | 0.1113 | Benign    | -4.29 | Benign | 0.28 | Neutral | 0.00 | Benign            | 0.53 | Tolerated   | 10.91 | Neutral     |
| p.Ala143Tyr | VUS           | -1.11 | Neutral | 0.2593 | Benign    | -5.92 | Benign | 0.39 | Neutral | 0.93 | Possibly damaging | 0.53 | Tolerated   |       |             |
| p.Ala143Cys | VUS           | -1.23 | Neutral | 0.2989 | Benign    | -5.09 | Benign | 0.39 | Neutral | 0.98 | Probably damaging | 0.16 | Tolerated   |       |             |
| p.Ala143Trp | VUS           | -1.68 | Neutral | 0.3151 | Benign    | -5.77 | Benign | 0.44 | Neutral | 0.98 | Probably damaging | 0.11 | Tolerated   |       |             |
| p.Ala143Phe | VUS           | -0.74 | Neutral | 0.2193 | Benign    | -5.72 | Benign | 0.40 | Neutral | 0.82 | Possibly damaging | 0.38 | Tolerated   |       |             |
| p.Arg144Asn | VUS           | -0.11 | Neutral | 0.2474 | Benign    | -4.32 | Benign | 0.31 | Neutral | 0.01 | Benign            | 0.09 | Tolerated   |       |             |
| p.Arg144Lys | VUS           | -0.74 | Neutral | 0.1626 | Benign    | -4.96 | Benign | 0.20 | Neutral | 0.01 | Benign            | 1    | Tolerated   |       |             |
| p.Arg144Thr | VUS           | -0.34 | Neutral | 0.1087 | Benign    | -3.81 | Benign | 0.26 | Neutral | 0.01 | Benign            | 0.1  | Tolerated   |       |             |
| p.Arg144Ser | VUS           | -0.41 | Neutral | 0.1479 | Benign    | -3.10 | Benign | 0.17 | Neutral | 0.00 | Benign            | 0.11 | Tolerated   | 0.04  | Neutral     |
| p.Arg144Ile | VUS           | -0.67 | Neutral | 0.1729 | Benign    | -4.85 | Benign | 0.23 | Neutral | 0.03 | Benign            | 0.04 | Deleterious |       |             |
| p.Arg144Met | VUS           | -0.35 | Neutral | 0.218  | Benign    | -5.62 | Benign | 0.31 | Neutral | 0.39 | Benign            | 0.03 | Deleterious |       |             |
| p.Arg144His | VUS           | -0.56 | Neutral | 0.0933 | Benign    | -4.43 | Benign | 0.11 | Neutral | 0.00 | Benign            | 0.06 | Tolerated   | 4.38  | Neutral     |
| p.Arg144Gln | VUS           | -0.43 | Neutral | 0.0911 | Benign    | -4.18 | Benign | 0.17 | Neutral | 0.03 | Benign            | 0.17 | Tolerated   |       |             |
| p.Arg144Pro | VUS           | -1.27 | Neutral | 0.0937 | Benign    | -3.26 | Benign | 0.24 | Neutral | 0.00 | Benign            | 0.07 | Tolerated   | 6.21  | Neutral     |
| p.Arg144Leu | VUS           | -0.17 | Neutral | 0.1097 | Benign    | -4.07 | Benign | 0.19 | Neutral | 0.01 | Benign            | 0.08 | Tolerated   | 2.32  | Neutral     |
| p.Arg144Asp | VUS           | -0.45 | Neutral | 0.1536 | Benign    | -2.90 | Benign | 0.29 | Neutral | 0.01 | Benign            | 0.08 | Tolerated   |       |             |
| p.Arg144Glu | VUS           | -0.46 | Neutral | 0.127  | Benign    | -3.09 | Benign | 0.26 | Neutral | 0.01 | Benign            | 0.66 | Tolerated   |       |             |
| p.Arg144Ala | VUS           | -0.38 | Neutral | 0.1021 | Benign    | -2.55 | Benign | 0.27 | Neutral | 0.00 | Benign            | 0.12 | Tolerated   |       |             |
| p.Arg144Gly | VUS           | -0.84 | Neutral | 0.0753 | Benign    | -2.52 | Benign | 0.14 | Neutral | 0.00 | Benign            | 0.07 | Tolerated   | 0.14  | Neutral     |
| p.Arg144Val | VUS           | -0.16 | Neutral | 0.1463 | Benign    | -3.69 | Benign | 0.25 | Neutral | 0.01 | Benign            | 0.05 | Deleterious |       |             |
| p.Arg144Tyr | VUS           | -0.32 | Neutral | 0.2413 | Benign    | -5.87 | Benign | 0.27 | Neutral | 0.02 | Benign            | 0.03 | Deleterious |       |             |
| p.Arg144Cys | Likely benign | -0.03 | Neutral | 0.1551 | Benign    | -5.12 | Benign | 0.26 | Neutral | 0.00 | Benign            | 0.01 | Deleterious | 4.63  | Neutral     |
| p.Arg144Trp | VUS           | -0.28 | Neutral | 0.1153 | Benign    | -5.87 | Benign | 0.27 | Neutral | 0.71 | Possibly damaging | 0.01 | Deleterious |       |             |
| p.Arg144Phe | VUS           | -0.11 | Neutral | 0.2614 | Benign    | -5.77 | Benign | 0.34 | Neutral | 0.03 | Benign            | 0.02 | Deleterious |       |             |
| p.Ile145Asn | VUS           | -0.68 | Neutral | 0.1287 | Benign    | -2.73 | Benign | 0.13 | Neutral | 0.03 | Benign            | 0.13 | Tolerated   |       |             |
| p.Ile145Lys | VUS           | -0.74 | Neutral | 0.2074 | Benign    | -2.37 | Benign | 0.25 | Neutral | 0.02 | Benign            | 0.16 | Tolerated   | 9.74  | Neutral     |
| p.Ile145Thr | VUS           | -1.03 | Neutral | 0.1185 | Benign    | -1.66 | Benign | 0.09 | Neutral | 0.00 | Benign            | 0.2  | Tolerated   | 5.59  | Neutral     |
| p.Ile145Arg | VUS           | -1.68 | Neutral | 0.1187 | Benign    | -0.84 | Benign | 0.19 | Neutral | 0.05 | Benign            | 0.12 | Tolerated   | 8.58  | Neutral     |
| p.Ile145Ser | VUS           | -0.64 | Neutral | 0.1266 | Benign    | -1.11 | Benign | 0.12 | Neutral | 0.00 | Benign            | 0.29 | Tolerated   |       |             |
| p.Ile145Met | VUS           | -3.12 | Neutral | 0.0964 | Benign    | -3.42 | Benign | 0.13 | Neutral | 0.29 | Benign            | 0.13 | Tolerated   | 0.23  | Neutral     |
| p.Ile145His | VUS           | -0.55 | Neutral | 0.2337 | Benign    | -2.10 | Benign | 0.20 | Neutral | 0.62 | Possibly damaging | 0.06 | Tolerated   |       |             |
| p.Ile145Gln | VUS           | -1.06 | Neutral | 0.1739 | Benign    | -1.49 | Benign | 0.19 | Neutral | 0.13 | Benign            | 0.1  | Tolerated   |       |             |
| p.Ile145Pro | VUS           | -0.38 | Neutral | 0.1772 | Benign    | -0.58 | Benign | 0.21 | Neutral | 0.00 | Benign            | 0.14 | Tolerated   |       |             |
| p.Ile145Leu | VUS           | -0.77 | Neutral | 0.1002 | Benign    | -1.63 | Benign | 0.22 | Neutral | 0.01 | Benign            | 0.61 | Tolerated   | 0.07  | Neutral     |
| p.Ile145Asp | VUS           | -1.09 | Neutral | 0.2116 | Benign    | -0.72 | Benign | 0.30 | Neutral | 0.03 | Benign            | 0.13 | Tolerated   |       |             |
| p.Ile145Glu | VUS           | -0.60 | Neutral | 0.1666 | Benign    | -0.54 | Benign | 0.30 | Neutral | 0.03 | Benign            | 0.13 | Tolerated   |       |             |
| p.Ile145Ala | VUS           | -3.86 | Neutral | 0.1271 | Benign    | -0.29 | Benign | 0.18 | Neutral | 0.00 | Benign            | 0.47 | Tolerated   |       |             |
| p.Ile145Gly | VUS           | -0.33 | Neutral | 0.2128 | Benign    | -0.19 | Benign | 0.17 | Neutral | 0.00 | Benign            | 0.3  | Tolerated   |       |             |
| p.Ile145Val | VUS           | -2.24 | Neutral | 0.0996 | Benign    | -1.76 | Benign | 0.12 | Neutral | 0.00 | Benign            | 0.97 | Tolerated   | 0.00  | Neutral     |
| p.Ile145Tyr | VUS           | -0.82 | Neutral | 0.2778 | Benign    | -4.33 | Benign | 0.30 | Neutral | 0.32 | Benign            | 0.12 | Tolerated   |       |             |
| p.Ile145Cys | VUS           | -0.23 | Neutral | 0.4874 | Ambiguous | -2.99 | Benign | 0.29 | Neutral | 0.35 | Benign            | 0.07 | Tolerated   |       |             |
| p.Ile145Trp | VUS           | -1.01 | Neutral | 0.3666 | Ambiguous | -3.77 | Benign | 0.32 | Neutral | 0.86 | Possibly damaging | 0.03 | Deleterious |       |             |
| p.Ile145Phe | VUS           | -0.95 | Neutral | 0.1128 | Benign    | -3.99 | Benign | 0.25 | Neutral | 0.13 | Benign            | 0.16 | Tolerated   |       |             |
| p.Asp146Asn | VUS           | -3.08 | Neutral | 0.148  | Benign    | -4.76 | Benign | 0.13 | Neutral | 0.00 | Benign            | 0    |             |       |             |

|             |               |        |               |        |            |       |        |      |         |      |                   |      |             |       |             |
|-------------|---------------|--------|---------------|--------|------------|-------|--------|------|---------|------|-------------------|------|-------------|-------|-------------|
| p.Asp146Cys | VUS           | -3.78  | Neutral       | 0.3974 | Ambiguous  | -4.71 | Benign | 0.37 | Neutral | 0.58 | Possibly damaging | 0    | Deleterious |       |             |
| p.Asp146Trp | VUS           | -0.56  | Neutral       | 0.5798 | Pathogenic | -5.33 | Benign | 0.37 | Neutral | 0.58 | Possibly damaging | 0    | Deleterious |       |             |
| p.Asp146Phe | VUS           | -1.81  | Neutral       | 0.3732 | Ambiguous  | -5.37 | Benign | 0.35 | Neutral | 0.08 | Benign            | 0    | Deleterious |       |             |
| p.Ala147Asn | VUS           | -0.93  | Neutral       | 0.2019 | Benign     | -5.67 | Benign | 0.38 | Neutral | 0.45 | Benign            | 0.17 | Tolerated   |       |             |
| p.Ala147Lys | VUS           | -1.03  | Neutral       | 0.2553 | Benign     | -5.44 | Benign | 0.39 | Neutral | 0.19 | Benign            | 0.18 | Tolerated   |       |             |
| p.Ala147Thr | VUS           | -0.92  | Neutral       | 0.0804 | Benign     | -4.49 | Benign | 0.16 | Neutral | 0.08 | Benign            | 0.91 | Tolerated   | 15.28 | Deleterious |
| p.Ala147Arg | VUS           | -0.26  | Neutral       | 0.1538 | Benign     | -4.27 | Benign | 0.29 | Neutral | 0.45 | Benign            | 0.12 | Tolerated   |       |             |
| p.Ala147Ser | VUS           | -1.41  | Neutral       | 0.0998 | Benign     | -4.21 | Benign | 0.15 | Neutral | 0.00 | Benign            | 0.7  | Tolerated   | 7.95  | Neutral     |
| p.Ala147Ile | VUS           | -0.68  | Neutral       | 0.1893 | Benign     | -5.47 | Benign | 0.38 | Neutral | 0.10 | Benign            | 0.3  | Tolerated   |       |             |
| p.Ala147Met | VUS           | -1.38  | Neutral       | 0.2114 | Benign     | -6.10 | Benign | 0.36 | Neutral | 0.62 | Possibly damaging | 0.1  | Tolerated   |       |             |
| p.Ala147His | VUS           | -0.23  | Neutral       | 0.2085 | Benign     | -5.71 | Benign | 0.29 | Neutral | 0.95 | Possibly damaging | 0.06 | Tolerated   |       |             |
| p.Ala147Gln | VUS           | -5.59  | Neutral       | 0.1828 | Benign     | -5.29 | Benign | 0.38 | Neutral | 0.45 | Benign            | 0.13 | Tolerated   |       |             |
| p.Ala147Pro | VUS           | -1.86  | Neutral       | 0.0928 | Benign     | -3.80 | Benign | 0.21 | Neutral | 0.00 | Benign            | 0.24 | Tolerated   | 12.40 | Neutral     |
| p.Ala147Leu | VUS           | -1.49  | Neutral       | 0.1278 | Benign     | -4.42 | Benign | 0.37 | Neutral | 0.05 | Benign            | 0.27 | Tolerated   |       |             |
| p.Ala147Asp | VUS           | -2.43  | Neutral       | 0.1068 | Benign     | -4.04 | Benign | 0.25 | Neutral | 0.15 | Benign            | 0.13 | Tolerated   | 14.09 | Neutral     |
| p.Ala147Glu | VUS           | -0.24  | Neutral       | 0.1148 | Benign     | -3.75 | Benign | 0.35 | Neutral | 0.19 | Benign            | 0.16 | Tolerated   |       |             |
| p.Ala147Gly | VUS           | -0.97  | Neutral       | 0.09   | Benign     | -3.42 | Benign | 0.18 | Neutral | 0.00 | Benign            | 0.34 | Tolerated   | 9.12  | Neutral     |
| p.Ala147Val | VUS           | -1.68  | Neutral       | 0.1016 | Benign     | -4.38 | Benign | 0.17 | Neutral | 0.00 | Benign            | 0.64 | Tolerated   | 9.43  | Neutral     |
| p.Ala147Tyr | VUS           | -0.40  | Neutral       | 0.2901 | Benign     | -6.98 | Benign | 0.31 | Neutral | 0.83 | Possibly damaging | 0.08 | Tolerated   |       |             |
| p.Ala147Cys | VUS           | -0.81  | Neutral       | 0.3345 | Benign     | -6.15 | Benign | 0.27 | Neutral | 0.95 | Possibly damaging | 0.23 | Tolerated   |       |             |
| p.Ala147Trp | VUS           | -0.55  | Neutral       | 0.3676 | Ambiguous  | -6.70 | Benign | 0.40 | Neutral | 0.95 | Possibly damaging | 0.03 | Deleterious |       |             |
| p.Ala147Phe | VUS           | -0.22  | Neutral       | 0.2218 | Benign     | -6.35 | Benign | 0.39 | Neutral | 0.62 | Possibly damaging | 0.09 | Tolerated   |       |             |
| p.Ala148Asn | VUS           | -6.43  | Indeterminate | 0.2079 | Benign     | -5.63 | Benign | 0.46 | Neutral | 0.77 | Possibly damaging | 0    | Deleterious |       |             |
| p.Ala148Lys | VUS           | -26.41 | Indeterminate | 0.2504 | Benign     | -5.49 | Benign | 0.48 | Neutral | 0.33 | Benign            | 0    | Deleterious |       |             |
| p.Ala148Thr | Likely benign | -1.32  | Neutral       | 0.0801 | Benign     | -4.63 | Benign | 0.12 | Neutral | 0.80 | Possibly damaging | 0    | Deleterious | 15.70 | Deleterious |
| p.Ala148Arg | VUS           | -8.95  | Indeterminate | 0.1519 | Benign     | -4.24 | Benign | 0.36 | Neutral | 0.63 | Possibly damaging | 0    | Deleterious |       |             |
| p.Ala148Ser | VUS           | -2.30  | Neutral       | 0.0873 | Benign     | -4.09 | Benign | 0.17 | Neutral | 0.07 | Benign            | 0    | Deleterious | 14.77 | Neutral     |
| p.Ala148Ile | VUS           | -3.57  | Neutral       | 0.2128 | Benign     | -5.17 | Benign | 0.46 | Neutral | 0.63 | Possibly damaging | 0    | Deleterious |       |             |
| p.Ala148Met | VUS           | -12.46 | Indeterminate | 0.219  | Benign     | -5.53 | Benign | 0.46 | Neutral | 0.96 | Probably damaging | 0    | Deleterious |       |             |
| p.Ala148His | VUS           | -6.12  | Indeterminate | 0.2355 | Benign     | -5.65 | Benign | 0.45 | Neutral | 0.96 | Probably damaging | 0    | Deleterious |       |             |
| p.Ala148Gln | VUS           | -9.43  | Indeterminate | 0.1675 | Benign     | -4.87 | Benign | 0.31 | Neutral | 0.03 | Benign            | 0    | Deleterious |       |             |
| p.Ala148Pro | VUS           | -4.20  | Neutral       | 0.0883 | Benign     | -3.89 | Benign | 0.48 | Neutral | 0.01 | Benign            | 0    | Deleterious | 15.93 | Deleterious |
| p.Ala148Leu | VUS           | -4.52  | Neutral       | 0.1365 | Benign     | -4.13 | Benign | 0.47 | Neutral | 0.33 | Benign            | 0    | Deleterious |       |             |
| p.Ala148Asp | VUS           | -3.31  | Neutral       | 0.1202 | Benign     | -3.97 | Benign | 0.48 | Neutral | 0.33 | Benign            | 0    | Deleterious |       |             |
| p.Ala148Glu | VUS           | -7.75  | Indeterminate | 0.1156 | Benign     | -3.57 | Benign | 0.22 | Neutral | 0.01 | Benign            | 0    | Deleterious | 13.03 | Neutral     |
| p.Ala148Gly | VUS           | -1.38  | Neutral       | 0.0837 | Benign     | -3.48 | Benign | 0.26 | Neutral | 0.01 | Benign            | 0    | Deleterious | 10.10 | Neutral     |
| p.Ala148Val | VUS           | -10.84 | Indeterminate | 0.1065 | Benign     | -4.20 | Benign | 0.16 | Neutral | 0.03 | Benign            | 0    | Deleterious | 9.76  | Neutral     |
| p.Ala148Tyr | VUS           | -0.81  | Neutral       | 0.3042 | Benign     | -6.69 | Benign | 0.47 | Neutral | 0.87 | Possibly damaging | 0    | Deleterious |       |             |
| p.Ala148Cys | VUS           | -0.04  | Neutral       | 0.3346 | Benign     | -5.91 | Benign | 0.41 | Neutral | 0.99 | Probably damaging | 0    | Deleterious |       |             |
| p.Ala148Trp | VUS           | -23.29 | Indeterminate | 0.3527 | Ambiguous  | -6.33 | Benign | 0.51 | Disease | 0.99 | Probably damaging | 0    | Deleterious |       |             |
| p.Ala148Phe | VUS           | -24.04 | Indeterminate | 0.2336 | Benign     | -6.05 | Benign | 0.49 | Neutral | 0.77 | Possibly damaging | 0    | Deleterious |       |             |
| p.Glu149Asn | VUS           | -0.21  | Neutral       | 0.2363 | Benign     | -4.72 | Benign | 0.38 | Neutral | 0.12 | Benign            | 0.08 | Tolerated   |       |             |
| p.Glu149Lys | VUS           | -1.24  | Neutral       | 0.1483 | Benign     | -5.09 | Benign | 0.35 | Neutral | 0.04 | Benign            | 0.12 | Tolerated   | 16.13 | Deleterious |
| p.Glu149Thr | VUS           | -3.47  | Neutral       | 0.1487 | Benign     | -3.51 | Benign | 0.39 | Neutral | 0.05 | Benign            | 0.06 | Tolerated   |       |             |
| p.Glu149Arg | VUS           | -0.32  | Neutral       | 0.1196 | Benign     | -3.11 | Benign | 0.37 | Neutral | 0.01 | Benign            | 0.04 | Deleterious |       |             |
| p.Glu149Ser | VUS           | -5.62  | Neutral       | 0.1372 | Benign     | -3.06 | Benign | 0.39 | Neutral | 0.03 | Benign            | 0.08 | Tolerated   |       |             |
| p.Glu149Ile | VUS           | -3.18  | Neutral       | 0.3233 | Benign     | -5.12 | Benign | 0.46 | Neutral | 0.00 | Benign            | 0.02 | Deleterious |       |             |
| p.Glu149Met | VUS           | -0.48  | Neutral       | 0.4196 | Ambiguous  | -5.39 | Benign | 0.34 | Neutral | 0.01 | Benign            | 0.01 | Deleterious |       |             |
| p.Glu149His | VUS           | -1.17  | Neutral       | 0.215  | Benign     | -4.58 | Benign | 0.25 | Neutral | 0.74 | Possibly damaging | 0.03 | Deleterious |       |             |
| p.Glu149Gln | VUS           | -0.22  | Neutral       | 0.1027 | Benign     | -4.20 | Benign | 0.15 | Neutral | 0.17 | Benign            | 0.13 | Tolerated   | 10.92 | Neutral     |
| p.Glu149Pro | VUS           | -0.16  | Neutral       | 0.1886 | Benign     | -2.71 | Benign | 0.43 | Neutral | 0.00 | Benign            | 0.06 | Tolerated   |       |             |
| p.Glu149Leu | VUS           | -0.12  | Neutral       | 0.258  | Benign     | -3.72 | Benign | 0.45 | Neutral | 0.01 | Benign            | 0.03 | Deleterious |       |             |
| p.Glu149Asp | VUS           | -1.68  | Neutral       | 0.1    | Benign     | -3.21 | Benign | 0.25 | Neutral | 0.04 | Benign            | 0.76 | Tolerated   | 6.26  | Neutral     |
| p.Glu149Ala | VUS           | -2.07  | Neutral       | 0.0853 | Benign     | -2.16 | Benign | 0.23 | Neutral | 0.00 | Benign            | 0.11 | Tolerated   | 11.61 | Neutral     |
| p.Glu149Gly | VUS           | -1.58  | Neutral       | 0.0873 | Benign     | -2.74 | Benign | 0.19 | Neutral | 0.00 | Benign            | 0.06 | Tolerated   | 12.78 | Neutral     |
| p.Glu149Val | VUS           | -1.34  | Neutral       | 0.1769 | Benign     | -3.95 | Benign | 0.42 | Neutral | 0.00 | Benign            | 0.03 | Deleterious | 16.59 | Deleterious |
| p.Glu149Tyr | VUS           | -1.10  | Neutral       | 0.3748 | Ambiguous  | -5.81 | Benign | 0.43 | Neutral | 0.74 | Possibly damaging | 0.01 | Deleterious |       |             |
| p.Glu149Cys | VUS           | -1.40  | Neutral       | 0.5637 | Ambiguous  | -4.96 | Benign | 0.33 | Neutral | 0.91 | Possibly damaging | 0    | Deleterious |       |             |
| p.Glu149Trp | VUS           | -1.72  | Neutral       | 0.5825 | Pathogenic | -6.09 | Benign | 0.46 | Neutral | 0.91 | Possibly damaging | 0    | Deleterious |       |             |
| p.Glu149Phe | VUS           | -4.67  | Neutral       | 0.4663 | Ambiguous  | -5.34 | Benign | 0.46 | Neutral | 0.31 | Benign            | 0.01 | Deleterious |       |             |
| p.Gly150Asn | VUS           | -0.22  | Neutral       | 0.1638 | Benign     | -5.06 | Benign | 0.39 | Neutral | 0.02 | Benign            | 0.41 | Tolerated   |       |             |
| p.Gly150Lys | VUS           | -2.08  | Neutral       | 0.2131 | Benign     | -5.12 | Benign | 0.41 | Neutral | 0.51 | Possibly damaging | 1    | Tolerated   |       |             |
| p.Gly150Thr | VUS           | -1.15  | Neutral       | 0.0936 | Benign     | -4.15 | Benign | 0.27 | Neutral | 0.51 | Possibly damaging | 0.27 | Tolerated   |       |             |
| p.Gly150Arg | VUS           | -0.34  | Neutral       | 0.1683 | Benign     | -3.78 | Benign | 0.41 | Neutral | 0.03 | Benign            | 0.47 | Tolerated   | 14.19 | Neutral     |
| p.Gly150Ser | VUS           | -1.31  | Neutral       | 0.0985 | Benign     | -3.67 | Benign | 0.14 | Neutral | 0.05 | Benign            | 0.42 | Tolerated   | 10.05 | Neutral     |
| p.Gly150Ile | VUS           | -0.16  | Neutral       | 0.1346 | Benign     | -4.58 | Benign | 0.44 | Neutral | 0.94 | Possibly damaging | 0.09 | Tolerated   |       |             |
| p.Gly150Met | VUS           | -0.78  | Neutral       | 0.231  | Benign     | -5.39 | Benign | 0.45 | Neutral | 0.99 | Probably damaging | 0.06 | Tolerated   |       |             |
| p.Gly150His | VUS           | -1.35  | Neutral       | 0.1691 | Benign     | -5.13 | Benign | 0.32 | Neutral | 0.98 | Probably damaging | 0.14 | Tolerated   |       |             |
| p.Gly150Gln | VUS           | -1.46  | Neutral       | 0.1539 | Benign     | -4.40 | Benign | 0.38 | Neutral | 0.88 | Possibly damaging | 0.32 | Tolerated   |       |             |
| p.Gly150Pro | VUS           | -0.78  | Neutral       | 0.2298 | Benign     | -3.31 | Benign | 0.39 | Neutral | 0.94 | Possibly damaging | 0.19 | Tolerated   |       |             |
| p.Gly150Leu | VUS           | -0.48  | Neutral       | 0.1639 | Benign     | -3.85 | Benign | 0.30 | Neutral | 0.88 | Possibly damaging | 0.17 | Tolerated   |       |             |
| p.Gly150Asp | VUS           | -1.76  | Neutral       | 0.0881 | Benign     | -3.69 | Benign | 0.29 | Neutral | 0.01 | Benign            | 0.39 | Tolerated   | 10.58 | Neutral     |
| p.Gly150Glu | VUS           | -0.18  | Neutral       | 0.084  | Benign     | -3.41 | Benign | 0.37 | Neutral | 0.51 | Possibly damaging | 0.42 | Tolerated   |       |             |
| p.Gly150Ala | VUS           | -0.14  | Neutral       | 0.0866 | Benign     | -3.32 | Benign | 0.13 | Neutral | 0.06 | Benign            | 0.47 | Tolerated   | 8.81  | Neutral     |
| p.Gly150Val | VUS           | -0.76  | Neutral       | 0.0977 | Benign     | -3.95 | Benign | 0.29 | Neutral | 0.85 | Possibly damaging | 0.14 | Tolerated   | 17.64 | Deleterious |
| p.Gly150Tyr | VUS           | -0.13  | Neutral       | 0.1895 | Benign     | -6.43 | Benign | 0.44 | Neutral | 0.98 | Probably damaging | 0.09 | Tolerated   |       |             |
| p.Gly150Cys | VUS           | -0.02  | Neutral       | 0.1781 | Benign     | -5.86 | Benign | 0.44 | Neutral | 0.99 | Probably damaging | 0.05 | Deleterious | 15.99 | Deleterious |
| p.Gly150Trp | VUS           | -0.49  | Neutral       | 0.1743 | Benign     | -6.25 | Benign | 0.44 | Neutral | 0.99 | Probably damaging | 0.03 | Deleterious |       |             |
| p.Gly150Phe | VUS           | -0.87  | Neutral       | 0.2684 | Benign     | -5.52 | Benign | 0.44 | Neutral | 0.98 | Probably damaging | 0.06 | Tolerated   |       |             |
| p.Pro151Asn | VUS           | -0.72  | Neutral       | 0.1899 | Benign     | -4.86 | Benign | 0.44 | Neutral | 0.77 | Possibly damaging | 0.41 | Tolerated   |       |             |
| p.Pro151Lys | VUS           | -0.10  | Neutral       | 0.1679 | Benign     | -5.17 | Benign | 0.48 | Neutral | 0.49 | Possibly damaging | 0.45 | Tolerated   |       |             |
| p.Pro151Thr | VUS           | -1.96  | Neutral       | 0.0763 | Benign     | -3.99 | Benign | 0.20 | Neutral | 0.00 | Benign            | 0.46 | Tolerated   | 9.37  | Neutral     |
| p.Pro151Arg | VUS           | -0.63  | Neutral       | 0.0798 | Benign     | -3.63 | Benign | 0.29 | Neutral | 0.72 | Possibly damaging | 0.42 | Tolerated   | 14.93 | Neutral     |
| p.Pro151Ser | VUS           | -15.51 | Indeterminate | 0.0798 | Benign     | -3.16 | Benign | 0.24 | Neutral | 0.01 | Benign            | 0.54 | Tolerated   | 9.05  | Neutral     |
| p.Pro151Ile | VUS           | -0.49  | Neutral       | 0.1737 | Benign     | -4.99 | Benign | 0.51 | Disease | 0.63 | Possibly damaging | 0.37 | Tolerated   |       |             |
| p.Pro151Met | VUS           | -0.07  | Neutral       | 0.2229 | Benign     | -5.77 | Benign | 0.49 | Neutral | 0.96 | Probably damaging | 0.2  | Tolerated   |       |             |
| p.Pro151His | VUS           | -0.88  | Neutral       | 0.0925 | Benign     | -4.94 | Benign | 0.28 | Neutral | 0.01 | Benign            | 0.42 | Tolerated   | 14.78 | Neutral     |
| p.Pro151Gln | VUS           | -0.19  | Neutral       | 0.0882 | Benign     | -4.84 | Benign | 0.41 | Neutral | 0.77 | Possibly damaging | 0.33 | Tolerated   |       |             |
| p.Pro151Leu | VUS           | -3.56  | Neutral       | 0.1004 | Benign     | -4.02 | Benign | 0.26 | Neutral | 0.27 | Benign            | 0.64 | Tolerated   | 15.41 | Deleterious |
| p.Pro151Asp | VUS           | -2.62  | Neutral       | 0.1412 | Benign     | -3.26 | Benign | 0.48 | Neutral | 0.49 | Possibly damaging | 0.36 | Tolerated   |       |             |
| p.Pro151Glu | VUS           | -0.84  | Neutral       | 0.1103 | Benign     | -3.74 | Benign | 0.44 | Neutral | 0.49 | Possibly damaging | 0.4  | Tolerated   |       |             |
| p.Pro151Ala | VUS           | -2.27  | Neutral       | 0.063  | Benign     | -3.15 | Benign | 0.32 | Neutral | 0.13 | Benign            | 0.67 | Tolerated   | 11.33 | Neutral     |
| p.Pro151Gly | VUS           | -8.60  | Indeterminate | 0.1164 | Benign     | -2.83 | Benign | 0.44 | Neutral | 0.33 | Benign            | 0.47 | Tolerated   |       |             |
| p.Pro151Val | VUS           | -0.18  | Neutral       | 0.1199 | Benign     | -4.25 | Benign | 0.31 | Neutral | 0.03 | Benign            | 0.48 | Tolerated   |       |             |
| p.Pro151Tyr | VUS           | -0.04  | Neutral       | 0.204  | Benign     | -5.61 | Benign | 0.49 | Neutral | 0.77 | Possibly damaging | 1    | Tolerated   |       |             |
| p.Pro151Cys | VUS           | -0.48  | Neutral       | 0.2543 | Benign     | -5.01 | Benign | 0.49 | Neutral | 0.99 | Probably damaging |      |             |       |             |

|             |     |        |               |        |            |       |        |      |         |      |                   |      |             |       |             |
|-------------|-----|--------|---------------|--------|------------|-------|--------|------|---------|------|-------------------|------|-------------|-------|-------------|
| p.Ser152Gly | VUS | -4.94  | Neutral       | 0.0752 | Benign     | -2.64 | Benign | 0.15 | Neutral | 0.05 | Benign            | 0.79 | Tolerated   |       |             |
| p.Ser152Val | VUS | -0.74  | Neutral       | 0.1548 | Benign     | -3.64 | Benign | 0.25 | Neutral | 0.05 | Benign            | 0.19 | Tolerated   |       |             |
| p.Ser152Tyr | VUS | -6.00  | Indeterminate | 0.1686 | Benign     | -5.83 | Benign | 0.35 | Neutral | 0.83 | Possibly damaging | 0.09 | Tolerated   |       |             |
| p.Ser152Cys | VUS | -0.14  | Neutral       | 0.1286 | Benign     | -5.27 | Benign | 0.32 | Neutral | 0.62 | Possibly damaging | 0.11 | Tolerated   |       |             |
| p.Ser152Trp | VUS | -0.77  | Neutral       | 0.1637 | Benign     | -5.34 | Benign | 0.40 | Neutral | 0.95 | Possibly damaging | 0.03 | Deleterious |       |             |
| p.Ser152Phe | VUS | -0.82  | Neutral       | 0.2066 | Benign     | -5.34 | Benign | 0.35 | Neutral | 0.62 | Possibly damaging | 0.07 | Tolerated   |       |             |
| p.Asp153Asn | VUS | -3.03  | Neutral       | 0.1258 | Benign     | -4.57 | Benign | 0.22 | Neutral | 0.08 | Benign            | 1    | Tolerated   | 25.20 | Deleterious |
| p.Asp153Lys | VUS | -1.73  | Neutral       | 0.2406 | Benign     | -4.74 | Benign | 0.29 | Neutral | 0.05 | Benign            | 0.13 | Tolerated   |       |             |
| p.Asp153Thr | VUS | -5.10  | Neutral       | 0.1456 | Benign     | -3.57 | Benign | 0.29 | Neutral | 0.10 | Benign            | 0.1  | Tolerated   |       |             |
| p.Asp153Arg | VUS | -4.54  | Neutral       | 0.1458 | Benign     | -3.09 | Benign | 0.28 | Neutral | 0.29 | Benign            | 0.06 | Tolerated   |       |             |
| p.Asp153Ser | VUS | 0.00   | Neutral       | 0.0995 | Benign     | -2.91 | Benign | 0.28 | Neutral | 0.05 | Benign            | 0.2  | Tolerated   |       |             |
| p.Asp153Ile | VUS | -0.70  | Neutral       | 0.2505 | Benign     | -4.40 | Benign | 0.30 | Neutral | 0.29 | Benign            | 0.01 | Deleterious |       |             |
| p.Asp153Met | VUS | -1.49  | Neutral       | 0.4459 | Ambiguous  | -5.20 | Benign | 0.31 | Neutral | 0.90 | Possibly damaging | 0.01 | Deleterious |       |             |
| p.Asp153His | VUS | -2.40  | Neutral       | 0.1339 | Benign     | -4.29 | Benign | 0.19 | Neutral | 0.88 | Possibly damaging | 0.07 | Tolerated   | 24.40 | Deleterious |
| p.Asp153Gln | VUS | -2.53  | Neutral       | 0.1533 | Benign     | -4.09 | Benign | 0.27 | Neutral | 0.29 | Benign            | 0.09 | Tolerated   |       |             |
| p.Asp153Pro | VUS | 0.00   | Neutral       | 0.2242 | Benign     | -2.92 | Benign | 0.31 | Neutral | 0.45 | Benign            | 0.06 | Tolerated   |       |             |
| p.Asp153Leu | VUS | -1.93  | Neutral       | 0.217  | Benign     | -3.61 | Benign | 0.32 | Neutral | 0.17 | Benign            | 0.03 | Deleterious |       |             |
| p.Asp153Glu | VUS | -0.72  | Neutral       | 0.11   | Benign     | -3.39 | Benign | 0.07 | Neutral | 0.00 | Benign            | 0.17 | Tolerated   | 0.30  | Neutral     |
| p.Asp153Ala | VUS | -0.06  | Neutral       | 0.0941 | Benign     | -2.90 | Benign | 0.19 | Neutral | 0.02 | Benign            | 0.1  | Tolerated   | 3.18  | Neutral     |
| p.Asp153Gly | VUS | 0.00   | Neutral       | 0.0907 | Benign     | -2.74 | Benign | 0.13 | Neutral | 0.00 | Benign            | 0.24 | Tolerated   | 1.87  | Neutral     |
| p.Asp153Val | VUS | -3.27  | Neutral       | 0.1424 | Benign     | -3.92 | Benign | 0.27 | Neutral | 0.13 | Benign            | 0.02 | Deleterious | 6.46  | Neutral     |
| p.Asp153Tyr | VUS | -3.98  | Neutral       | 0.1422 | Benign     | -4.27 | Benign | 0.28 | Neutral | 0.65 | Possibly damaging | 0.04 | Deleterious | 49.00 | Deleterious |
| p.Asp153Cys | VUS | -2.76  | Neutral       | 0.3314 | Benign     | -4.38 | Benign | 0.31 | Neutral | 0.00 | Benign            | 0.02 | Deleterious |       |             |
| p.Asp153Trp | VUS | -2.73  | Neutral       | 0.4708 | Ambiguous  | -5.07 | Benign | 0.36 | Neutral | 0.90 | Possibly damaging | 0.01 | Deleterious |       |             |
| p.Asp153Phe | VUS | -0.54  | Neutral       | 0.3314 | Benign     | -4.49 | Benign | 0.31 | Neutral | 0.45 | Benign            | 0.02 | Deleterious |       |             |
| p.Ile154Asn | VUS | -4.12  | Neutral       | 0.1052 | Benign     | -3.50 | Benign | 0.10 | Neutral | 0.00 | Benign            | 0.1  | Tolerated   | 4.16  | Neutral     |
| p.Ile154Lys | VUS | -0.82  | Neutral       | 0.243  | Benign     | -3.21 | Benign | 0.19 | Neutral | 0.00 | Benign            | 0.13 | Tolerated   |       |             |
| p.Ile154Thr | VUS | -4.01  | Neutral       | 0.20   | Benign     | -2.18 | Benign | 0.05 | Neutral | 0.00 | Benign            | 0.79 | Tolerated   | 6.37  | Neutral     |
| p.Ile154Arg | VUS | -1.80  | Neutral       | 0.1514 | Benign     | -1.74 | Benign | 0.18 | Neutral | 0.00 | Benign            | 0.09 | Tolerated   |       |             |
| p.Ile154Ser | VUS | -1.22  | Neutral       | 0.12   | Benign     | -1.48 | Benign | 0.08 | Neutral | 0.00 | Benign            | 0.29 | Tolerated   | 7.22  | Neutral     |
| p.Ile154Met | VUS | -2.85  | Neutral       | 0.1331 | Benign     | -3.99 | Benign | 0.08 | Neutral | 0.03 | Benign            | 0.12 | Tolerated   | 6.97  | Neutral     |
| p.Ile154His | VUS | -7.49  | Indeterminate | 0.1902 | Benign     | -3.01 | Benign | 0.21 | Neutral | 0.20 | Benign            | 0.05 | Deleterious |       |             |
| p.Ile154Gln | VUS | -2.71  | Neutral       | 0.1991 | Benign     | -2.54 | Benign | 0.23 | Neutral | 0.01 | Benign            | 0.09 | Tolerated   |       |             |
| p.Ile154Pro | VUS | -11.15 | Indeterminate | 0.2623 | Benign     | -1.45 | Benign | 0.23 | Neutral | 0.03 | Benign            | 0.11 | Tolerated   |       |             |
| p.Ile154Leu | VUS | -1.30  | Neutral       | 0.0907 | Benign     | -2.13 | Benign | 0.13 | Neutral | 0.00 | Benign            | 0.48 | Tolerated   | 0.60  | Neutral     |
| p.Ile154Asp | VUS | -1.80  | Neutral       | 0.1529 | Benign     | -1.86 | Benign | 0.17 | Neutral | 0.00 | Benign            | 0.08 | Tolerated   |       |             |
| p.Ile154Glu | VUS | -2.16  | Neutral       | 0.1869 | Benign     | -1.53 | Benign | 0.26 | Neutral | 0.00 | Benign            | 0.11 | Tolerated   |       |             |
| p.Ile154Ala | VUS | -11.26 | Indeterminate | 0.1848 | Benign     | -1.19 | Benign | 0.18 | Neutral | 0.00 | Benign            | 0.37 | Tolerated   |       |             |
| p.Ile154Gly | VUS | -0.86  | Neutral       | 0.2514 | Benign     | -0.95 | Benign | 0.14 | Neutral | 0.00 | Benign            | 0.07 | Tolerated   |       |             |
| p.Ile154Val | VUS | -5.37  | Neutral       | 0.12   | Benign     | -2.12 | Benign | 0.05 | Neutral | 0.00 | Benign            | 0.94 | Tolerated   | 0.70  | Neutral     |
| p.Ile154Tyr | VUS | -6.33  | Indeterminate | 0.2394 | Benign     | -4.89 | Benign | 0.18 | Neutral | 0.01 | Benign            | 0.08 | Tolerated   |       |             |
| p.Ile154Cys | VUS | -7.96  | Indeterminate | 0.457  | Ambiguous  | -3.47 | Benign | 0.18 | Neutral | 0.20 | Benign            | 0.07 | Tolerated   |       |             |
| p.Ile154Trp | VUS | -5.04  | Neutral       | 0.4093 | Ambiguous  | -4.07 | Benign | 0.20 | Neutral | 0.43 | Benign            | 0.02 | Deleterious |       |             |
| p.Ile154Phe | VUS | -2.57  | Neutral       | 0.102  | Benign     | -3.93 | Benign | 0.09 | Neutral | 0.00 | Benign            | 0.11 | Tolerated   | 0.84  | Neutral     |
| p.Pro155Asn | VUS | -1.38  | Neutral       | 0.245  | Benign     | -4.51 | Benign | 0.24 | Neutral | 0.77 | Possibly damaging | 0    | Deleterious |       |             |
| p.Pro155Lys | VUS | -4.81  | Neutral       | 0.2015 | Benign     | -3.82 | Benign | 0.21 | Neutral | 0.49 | Possibly damaging | 0    | Deleterious |       |             |
| p.Pro155Thr | VUS | 0.00   | Neutral       | 0.075  | Benign     | -3.48 | Benign | 0.14 | Neutral | 0.27 | Benign            | 0    | Deleterious | 5.66  | Neutral     |
| p.Pro155Arg | VUS | -0.34  | Neutral       | 0.0812 | Benign     | -3.02 | Benign | 0.16 | Neutral | 0.72 | Possibly damaging | 0    | Deleterious | 5.27  | Neutral     |
| p.Pro155Ser | VUS | -28.22 | Indeterminate | 0.0838 | Benign     | -2.51 | Benign | 0.08 | Neutral | 0.01 | Benign            | 0    | Deleterious | 6.39  | Neutral     |
| p.Pro155Ile | VUS | -7.35  | Indeterminate | 0.2085 | Benign     | -3.53 | Benign | 0.26 | Neutral | 0.33 | Benign            | 0    | Deleterious |       |             |
| p.Pro155Met | VUS | 0.00   | Neutral       | 0.2982 | Benign     | -4.40 | Benign | 0.23 | Neutral | 0.77 | Possibly damaging | 0    | Deleterious |       |             |
| p.Pro155His | VUS | -10.71 | Indeterminate | 0.123  | Benign     | -4.21 | Benign | 0.19 | Neutral | 0.98 | Probably damaging | 0    | Deleterious | 5.43  | Neutral     |
| p.Pro155Gln | VUS | 0.00   | Neutral       | 0.0963 | Benign     | -3.33 | Benign | 0.15 | Neutral | 0.87 | Possibly damaging | 0    | Deleterious |       |             |
| p.Pro155Leu | VUS | 0.00   | Neutral       | 0.125  | Benign     | -3.06 | Benign | 0.18 | Neutral | 0.00 | Benign            | 0    | Deleterious | 6.17  | Neutral     |
| p.Pro155Asp | VUS | -32.02 | Indeterminate | 0.1623 | Benign     | -2.61 | Benign | 0.26 | Neutral | 0.49 | Possibly damaging | 0    | Deleterious |       |             |
| p.Pro155Glu | VUS | 0.00   | Neutral       | 0.1133 | Benign     | -2.35 | Benign | 0.24 | Neutral | 0.49 | Possibly damaging | 0    | Deleterious |       |             |
| p.Pro155Ala | VUS | 0.00   | Neutral       | 0.0586 | Benign     | -2.99 | Benign | 0.14 | Neutral | 0.00 | Benign            | 0    | Deleterious | 5.51  | Neutral     |
| p.Pro155Gly | VUS | -0.04  | Neutral       | 0.1214 | Benign     | -2.95 | Benign | 0.18 | Neutral | 0.33 | Benign            | 0    | Deleterious |       |             |
| p.Pro155Val | VUS | -21.58 | Indeterminate | 0.138  | Benign     | -3.09 | Benign | 0.22 | Neutral | 0.33 | Benign            | 0    | Deleterious |       |             |
| p.Pro155Tyr | VUS | -0.02  | Neutral       | 0.2893 | Benign     | -5.04 | Benign | 0.25 | Neutral | 0.95 | Possibly damaging | 0    | Deleterious |       |             |
| p.Pro155Cys | VUS | 0.00   | Neutral       | 0.3012 | Benign     | -4.75 | Benign | 0.21 | Neutral | 0.96 | Probably damaging | 0    | Deleterious |       |             |
| p.Pro155Trp | VUS | -13.71 | Indeterminate | 0.3032 | Benign     | -4.95 | Benign | 0.27 | Neutral | 0.99 | Probably damaging | 0    | Deleterious |       |             |
| p.Pro155Phe | VUS | 0.00   | Neutral       | 0.3021 | Benign     | -4.46 | Benign | 0.25 | Neutral | 0.77 | Possibly damaging | 0    | Deleterious |       |             |
| p.Asp156Asn | VUS | -3.19  | Neutral       | 0.13   | Benign     | -4.37 | Benign | 0.05 | Neutral | 0.00 | Benign            | 0    | Deleterious | 10.02 | Neutral     |
| p.Asp156Lys | VUS | -7.54  | Indeterminate | 0.2314 | Benign     | -4.42 | Benign | 0.19 | Neutral | 0.21 | Benign            | 0    | Deleterious |       |             |
| p.Asp156Thr | VUS | -1.63  | Neutral       | 0.1663 | Benign     | -3.45 | Benign | 0.20 | Neutral | 0.34 | Benign            | 0    | Deleterious |       |             |
| p.Asp156Arg | VUS | -4.36  | Neutral       | 0.1677 | Benign     | -2.84 | Benign | 0.18 | Neutral | 0.65 | Possibly damaging | 0    | Deleterious |       |             |
| p.Asp156Ser | VUS | -0.77  | Neutral       | 0.0915 | Benign     | -2.61 | Benign | 0.19 | Neutral | 0.10 | Benign            | 0    | Deleterious |       |             |
| p.Asp156Ile | VUS | -2.46  | Neutral       | 0.3162 | Benign     | -4.16 | Benign | 0.23 | Neutral | 0.65 | Possibly damaging | 0    | Deleterious |       |             |
| p.Asp156Met | VUS | -1.90  | Neutral       | 0.5632 | Ambiguous  | -4.77 | Benign | 0.24 | Neutral | 0.98 | Probably damaging | 0    | Deleterious |       |             |
| p.Asp156His | VUS | -4.44  | Neutral       | 0.1454 | Benign     | -4.09 | Benign | 0.10 | Neutral | 0.88 | Possibly damaging | 0    | Deleterious | 9.67  | Neutral     |
| p.Asp156Gln | VUS | -6.15  | Indeterminate | 0.1475 | Benign     | -3.65 | Benign | 0.17 | Neutral | 0.48 | Possibly damaging | 0    | Deleterious |       |             |
| p.Asp156Pro | VUS | -0.96  | Neutral       | 0.2106 | Benign     | -2.74 | Benign | 0.22 | Neutral | 0.79 | Possibly damaging | 0    | Deleterious |       |             |
| p.Asp156Leu | VUS | -3.31  | Neutral       | 0.2758 | Benign     | -2.83 | Benign | 0.25 | Neutral | 0.21 | Benign            | 0    | Deleterious |       |             |
| p.Asp156Glu | VUS | -1.87  | Neutral       | 0.11   | Benign     | -3.22 | Benign | 0.06 | Neutral | 0.00 | Benign            | 0    | Deleterious | 4.93  | Neutral     |
| p.Asp156Ala | VUS | -9.22  | Indeterminate | 0.10   | Benign     | -2.29 | Benign | 0.06 | Neutral | 0.00 | Benign            | 0    | Deleterious | 7.78  | Neutral     |
| p.Asp156Gly | VUS | -3.71  | Neutral       | 0.12   | Benign     | -2.67 | Benign | 0.07 | Neutral | 0.08 | Benign            | 0    | Deleterious | 8.04  | Neutral     |
| p.Asp156Val | VUS | -3.79  | Neutral       | 0.188  | Benign     | -3.23 | Benign | 0.17 | Neutral | 0.16 | Benign            | 0    | Deleterious | 8.63  | Neutral     |
| p.Asp156Tyr | VUS | -6.31  | Indeterminate | 0.1729 | Benign     | -4.03 | Benign | 0.18 | Neutral | 0.96 | Possibly damaging | 0    | Deleterious | 11.12 | Neutral     |
| p.Asp156Cys | VUS | -6.69  | Indeterminate | 0.3819 | Ambiguous  | -3.93 | Benign | 0.23 | Neutral | 0.93 | Possibly damaging | 0    | Deleterious |       |             |
| p.Asp156Trp | VUS | -1.51  | Neutral       | 0.6033 | Pathogenic | -4.70 | Benign | 0.26 | Neutral | 0.98 | Probably damaging | 0    | Deleterious |       |             |
| p.Asp156Phe | VUS | -1.31  | Neutral       | 0.4633 | Ambiguous  | -3.52 | Benign | 0.22 | Neutral | 0.79 | Possibly damaging | 0    | Deleterious |       |             |
